# Supplementary material for: Genome-wide meta-analysis of insomnia prioritizes genes associated with metabolic and psychiatric pathways
Source: Springer Nature journal article supplement (doi:10.1038/s41588-022-01124-w), 2022-07-14

locus 1 rs528964

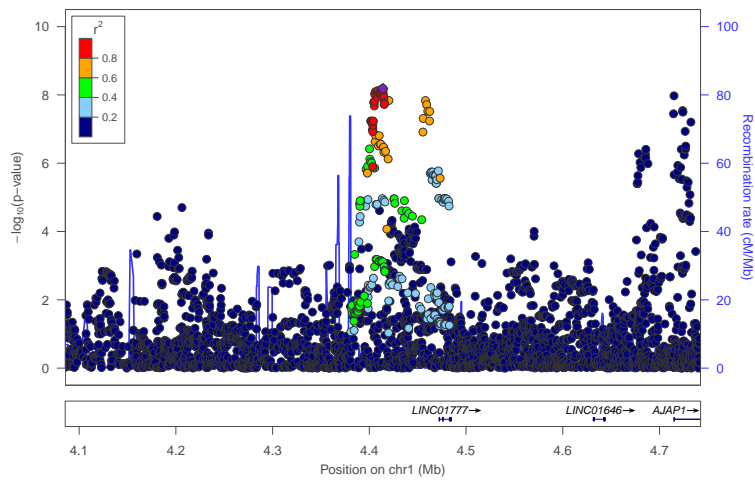

locus 2 rs148116709

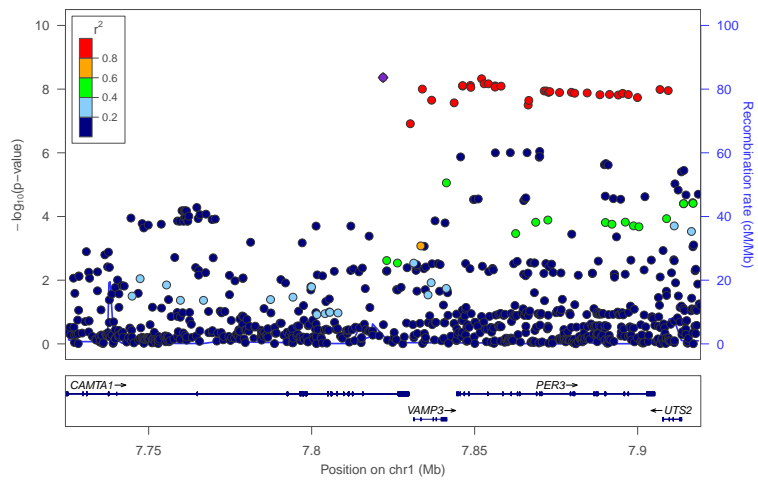

locus 3 rs10927840

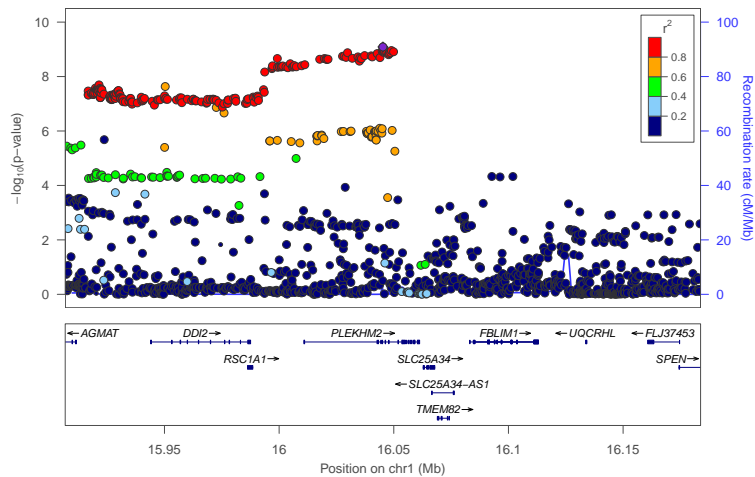

locus 4 rs112358407

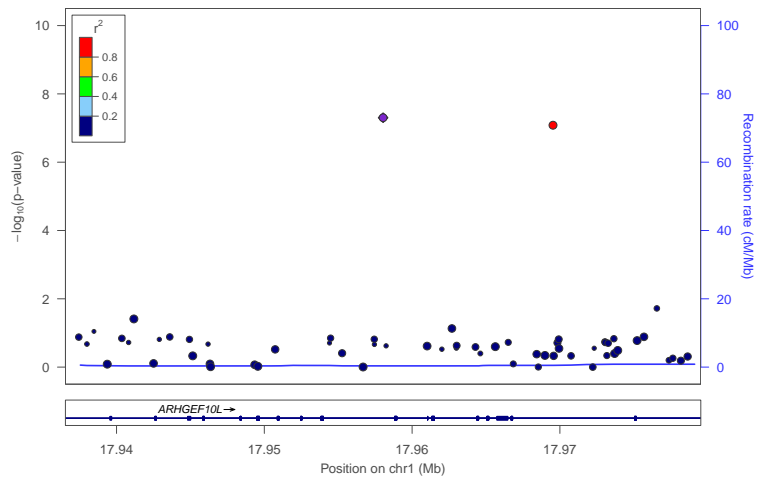

locus 5 rs55634335

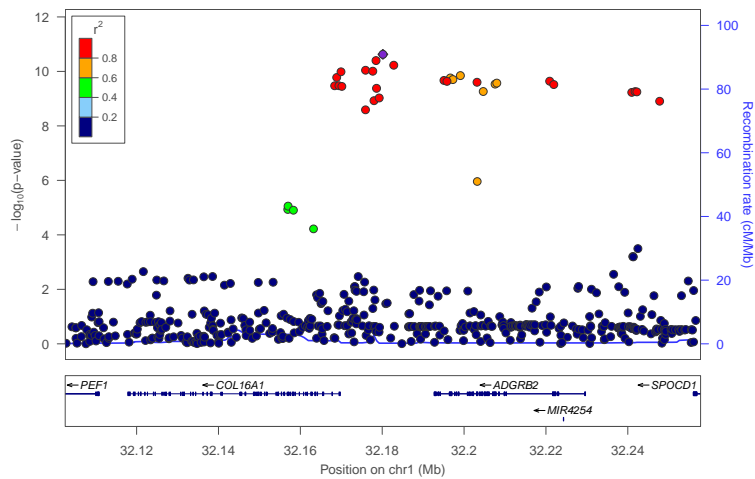

locus 6 rs11577667

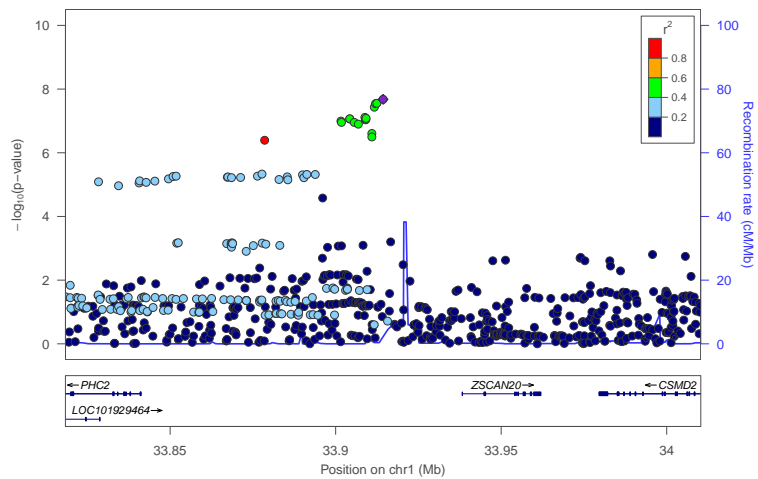

locus 7 rs72659623

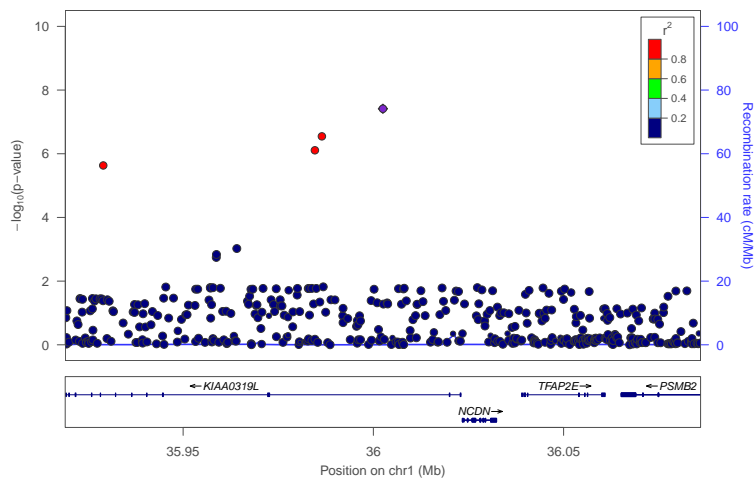

locus 8 rs218985

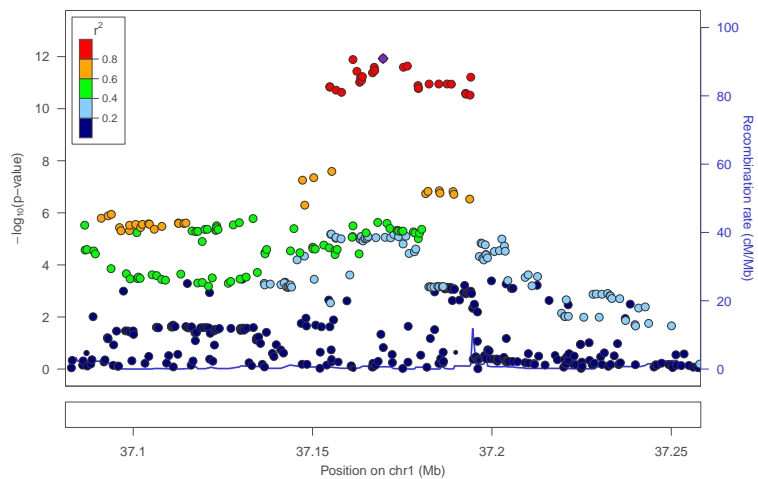

locus 9 rs1564119

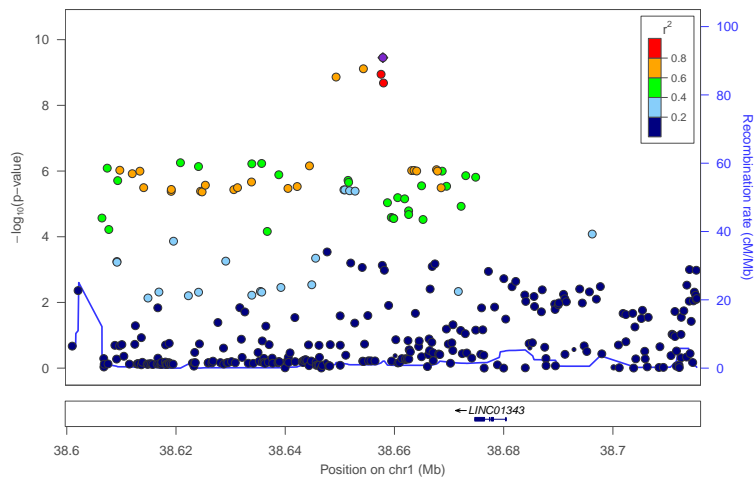

locus 10 rs579448

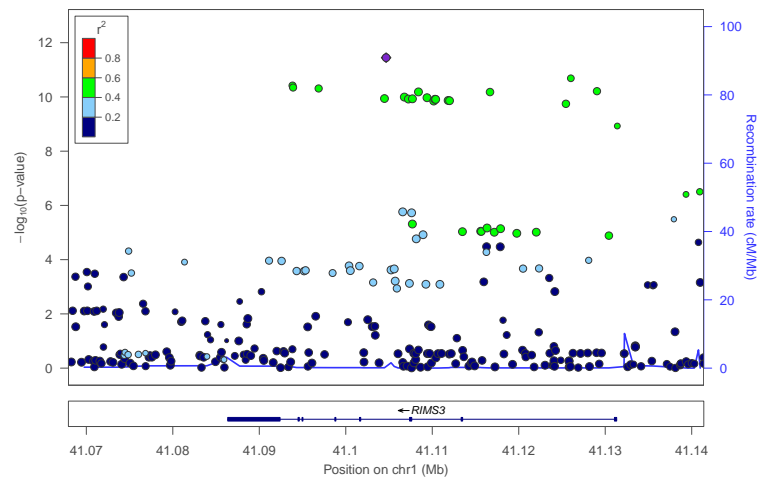

locus 11 rs4134058

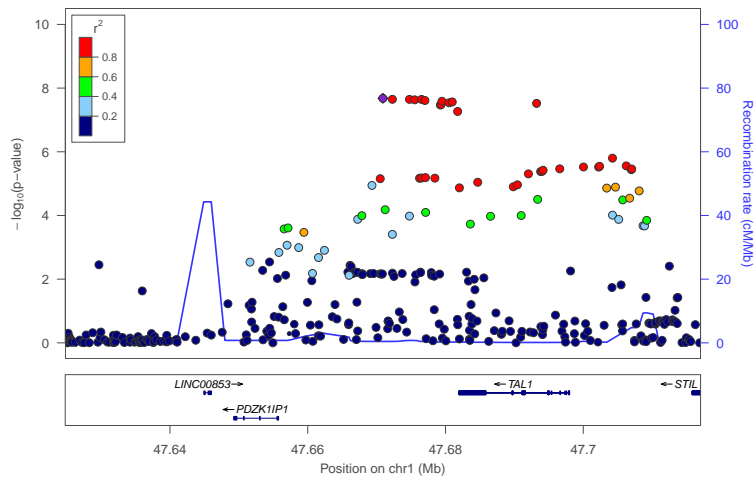

locus 12 rs12137221

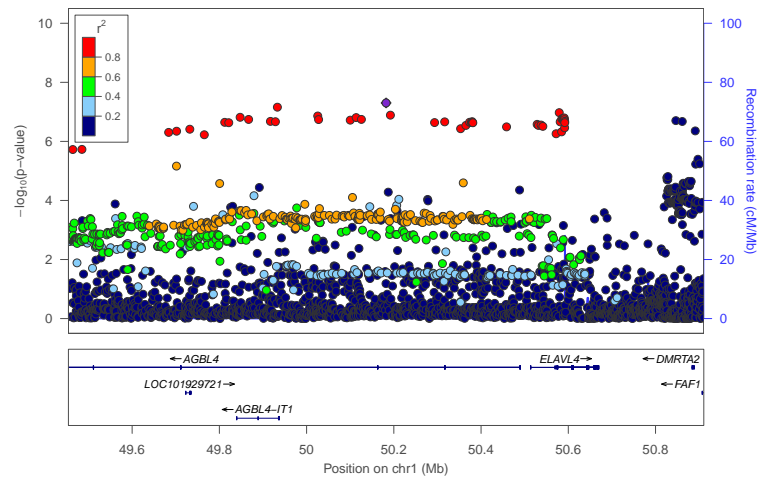

locus 13 rs543144

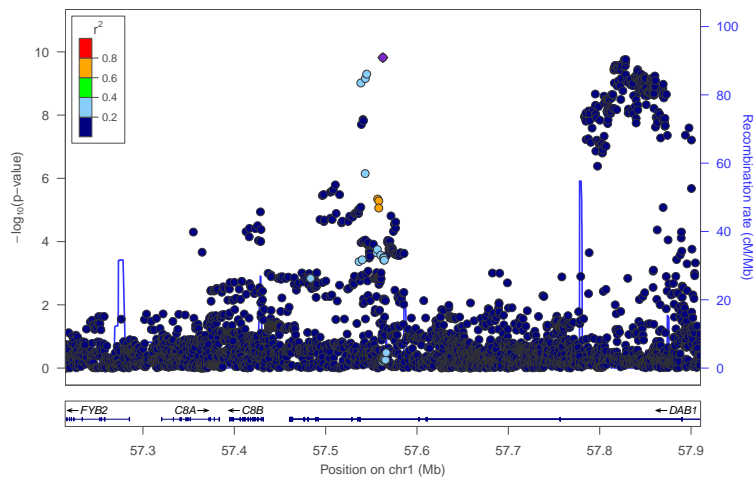

locus 14 rs61788417

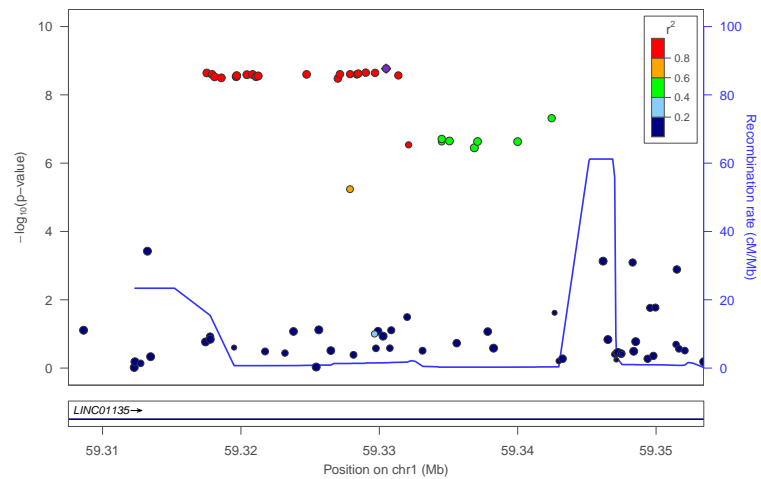

locus 15 rs2476194

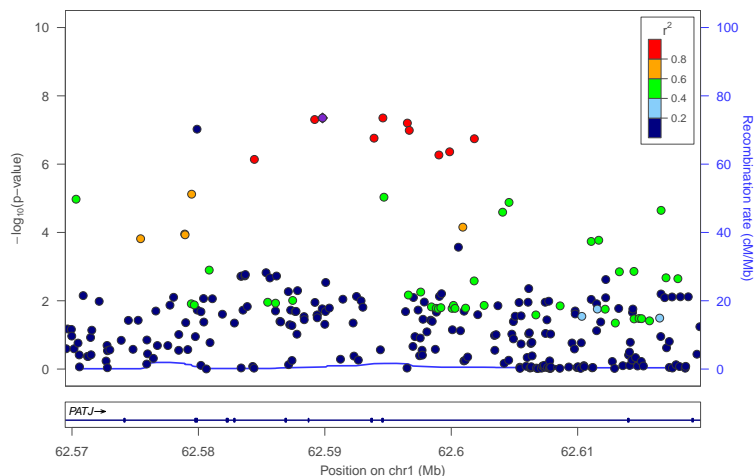

locus 16 rs6661750

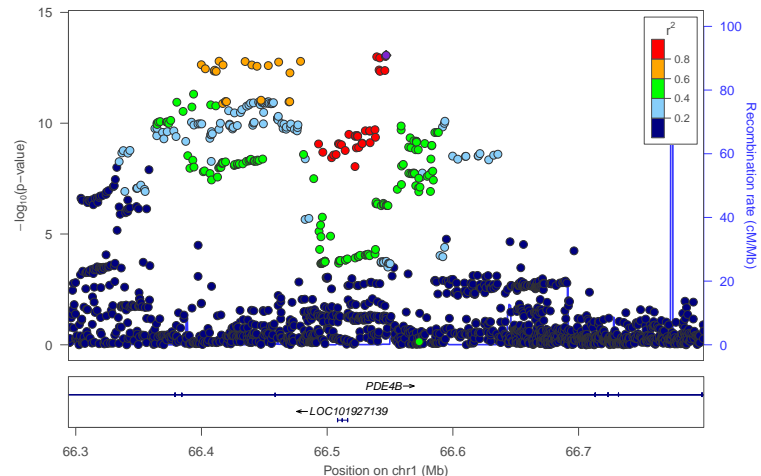

locus 17 rs3008892

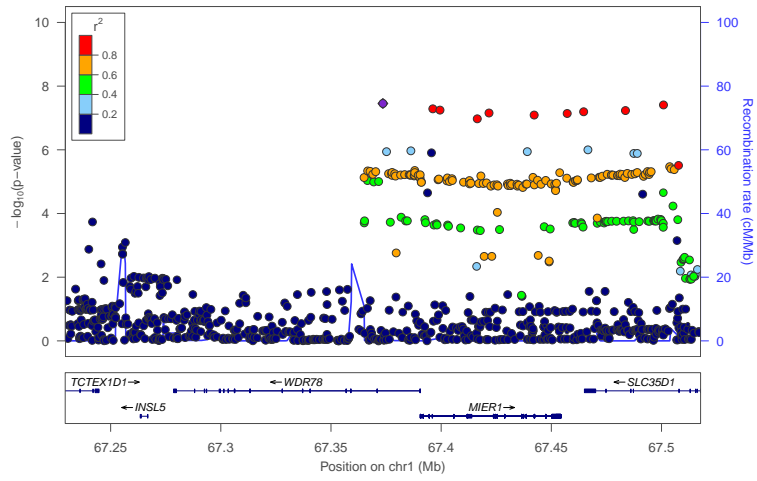

locus 18 rs2568960

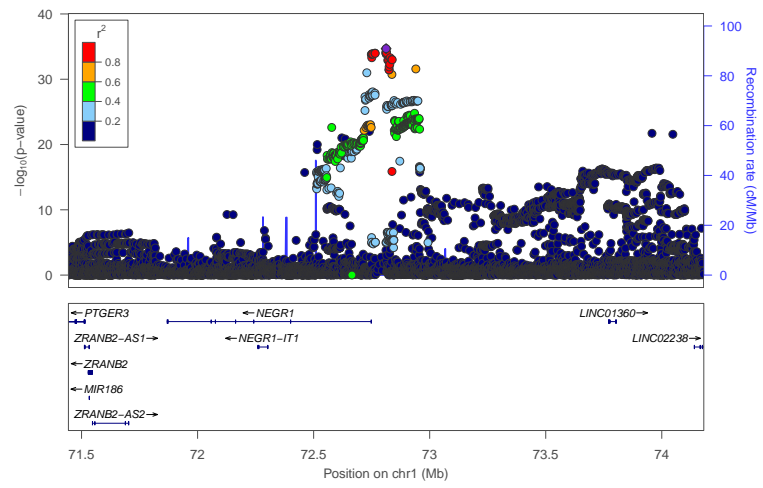

locus 19 rs4650265

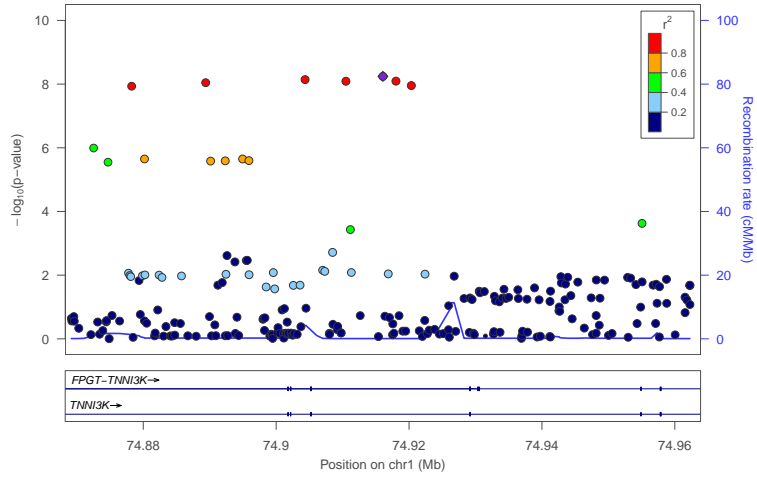

locus 20 rs34517439

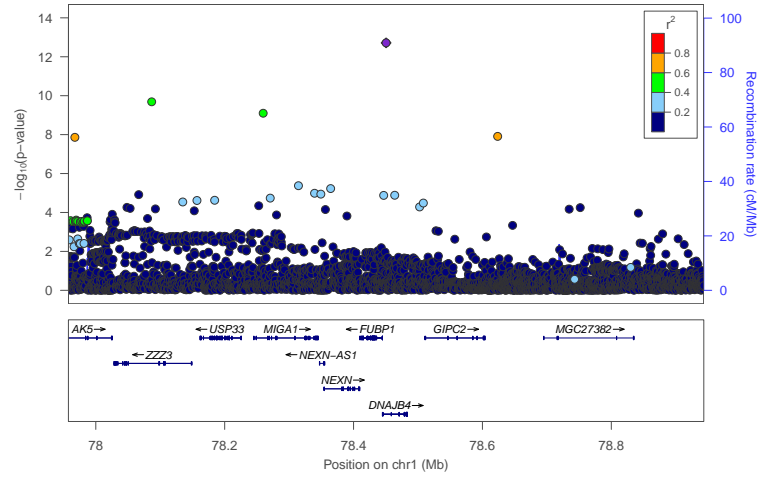

locus 21 rs72673689

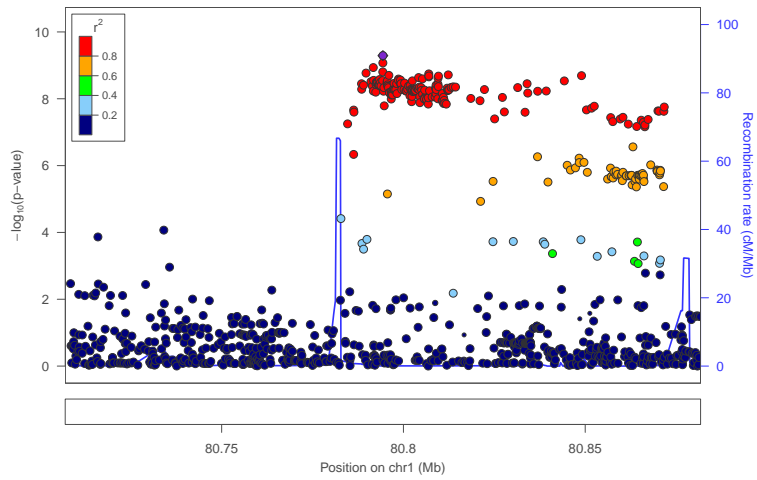

locus 22 rs503460

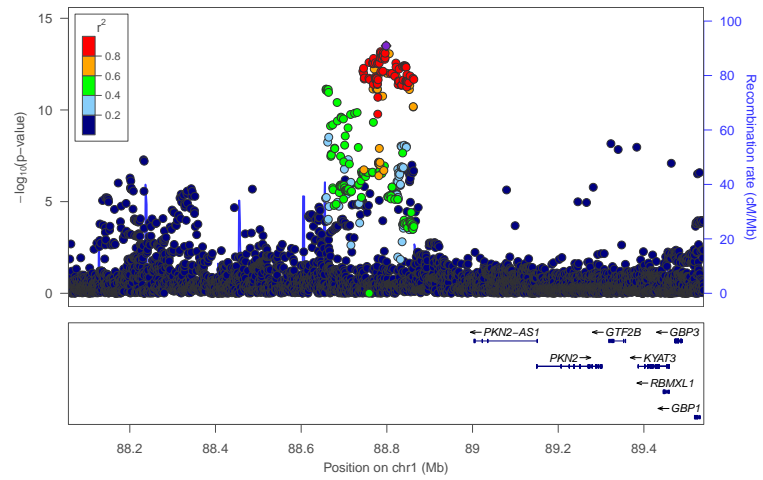

locus 23 rs12093332

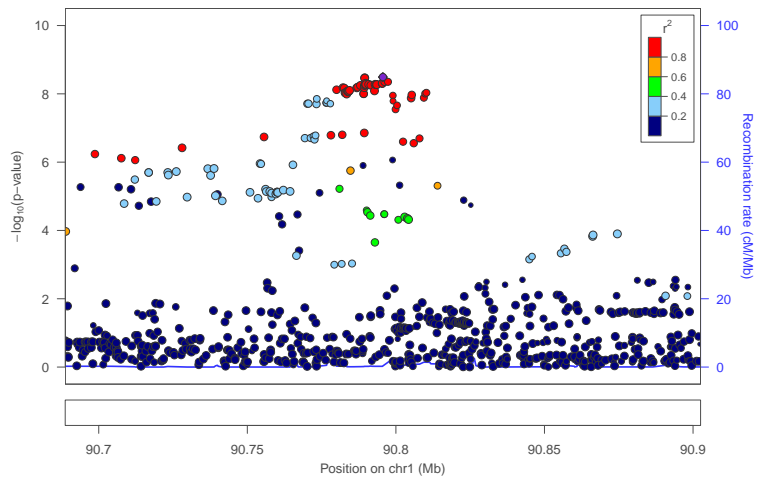

locus 24 rs11165657

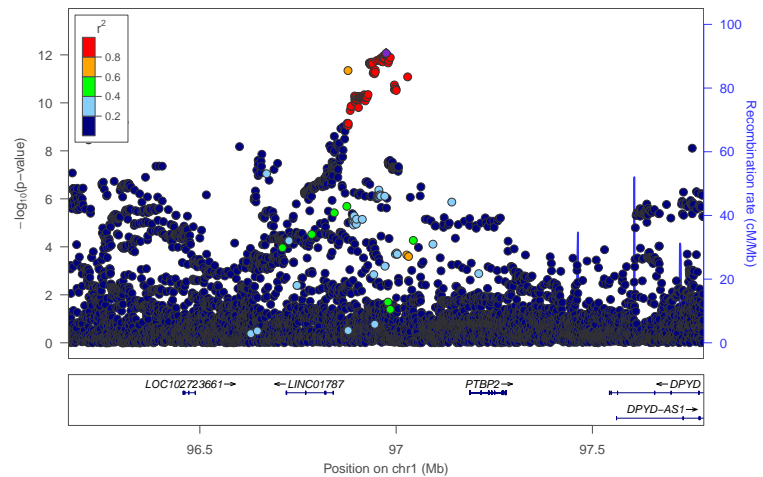

locus 25 rs12039093

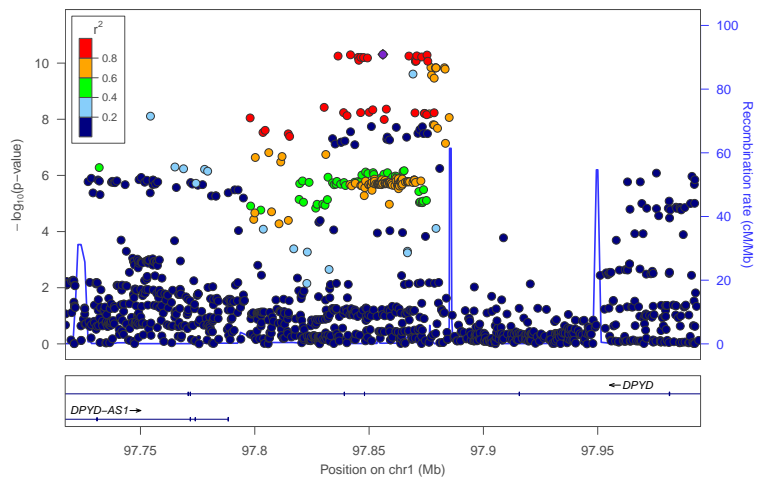

locus 26 rs9325358

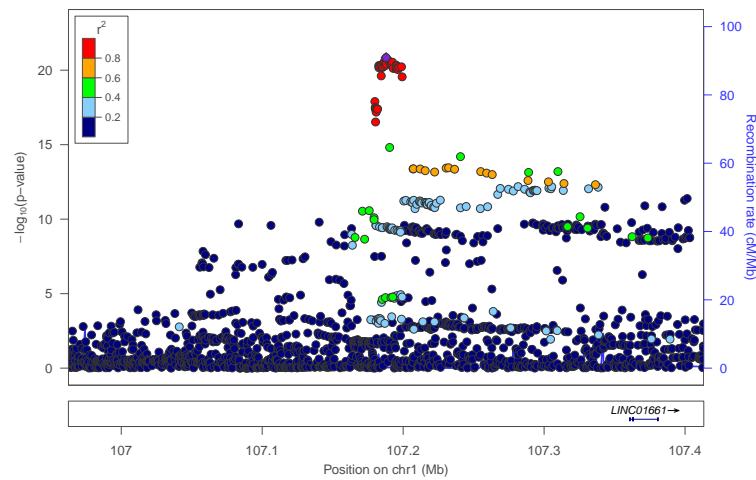

locus 27 rs1768790

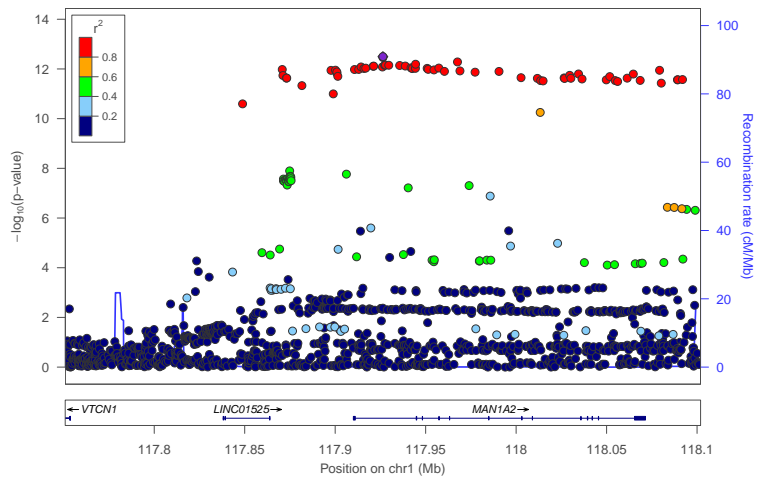

locus 28 rs834233

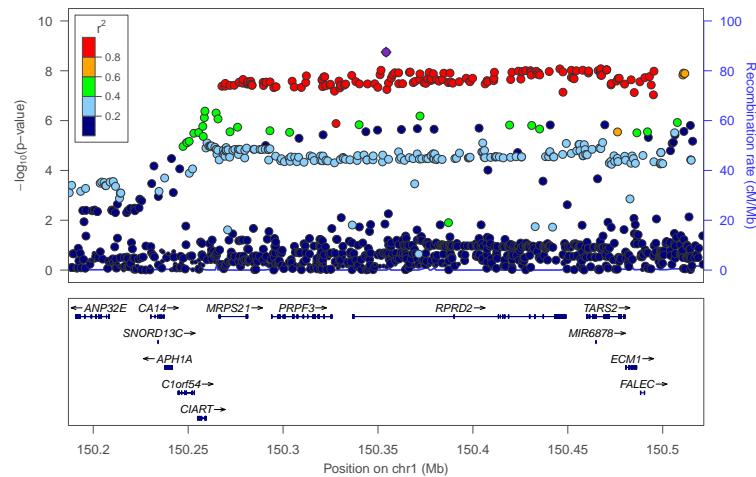

locus 29 rs11588258

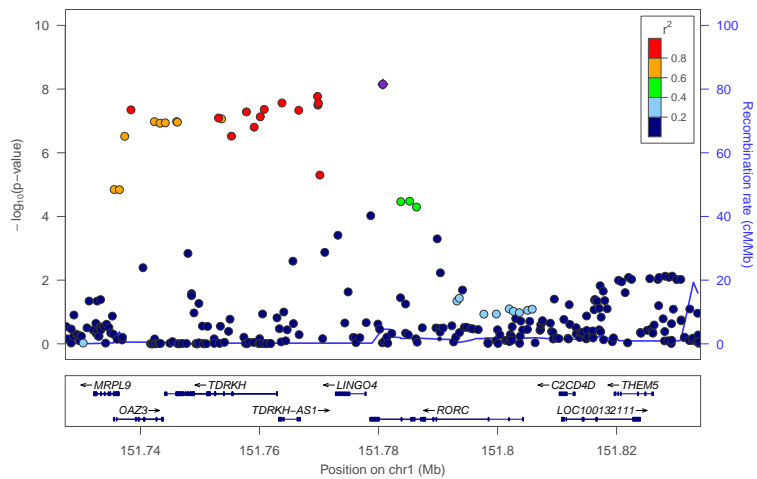

locus 30 rs12023901

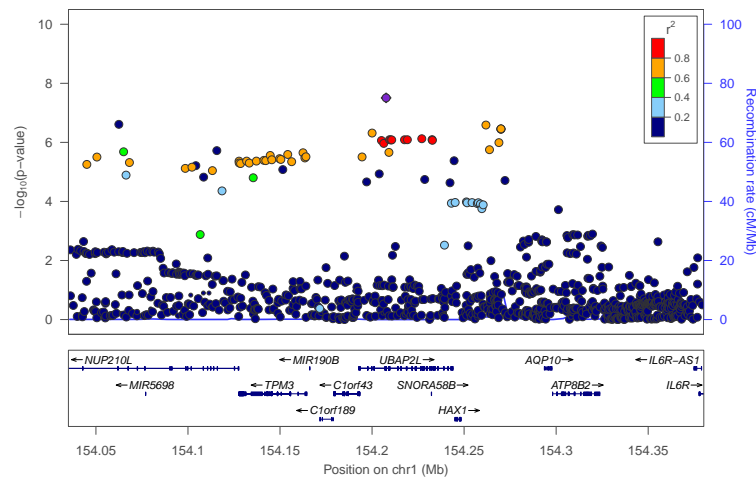

locus 31 rs7551881

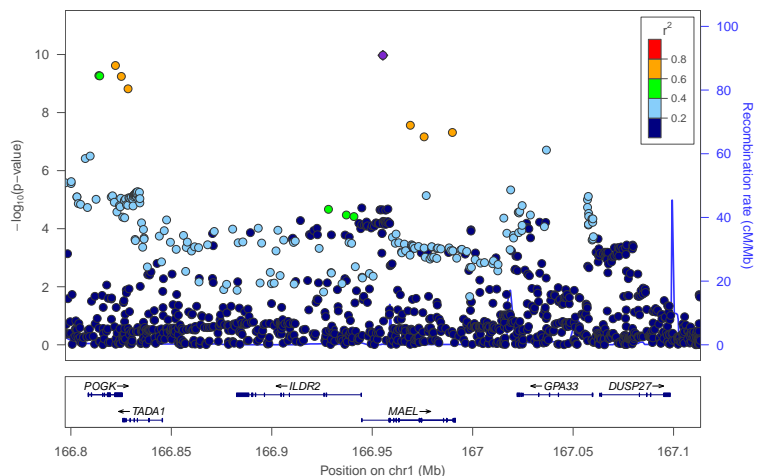

locus 32 rs56247945

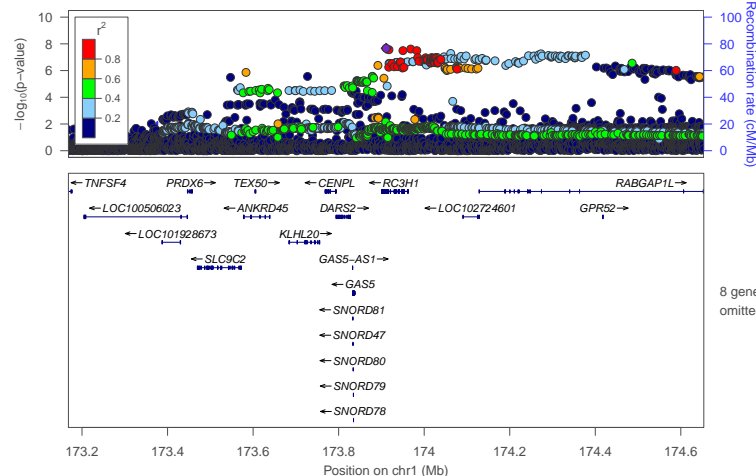

8 genes omitted



locus 33 rs509476

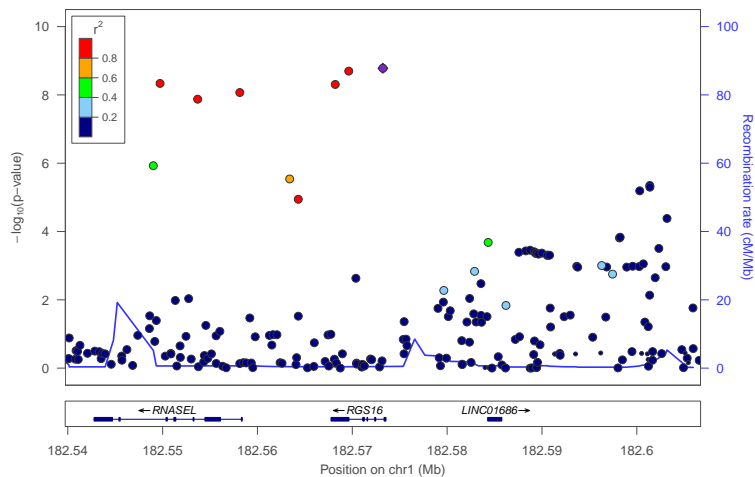

locus 34 rs2418884

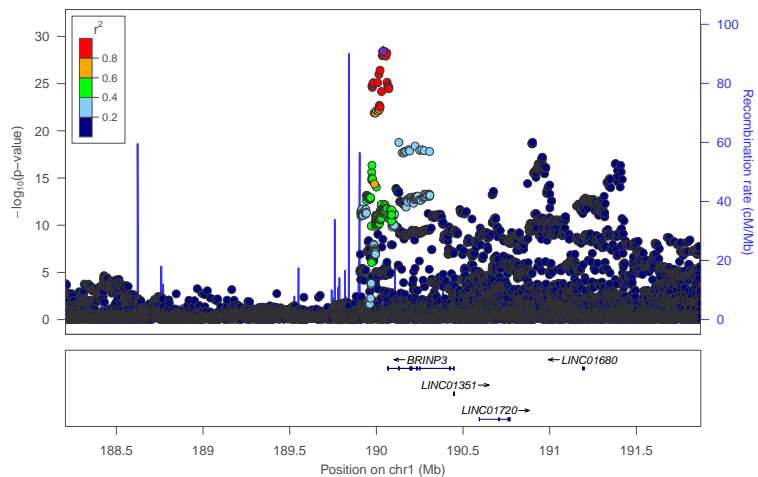

locus 35 rs5779928

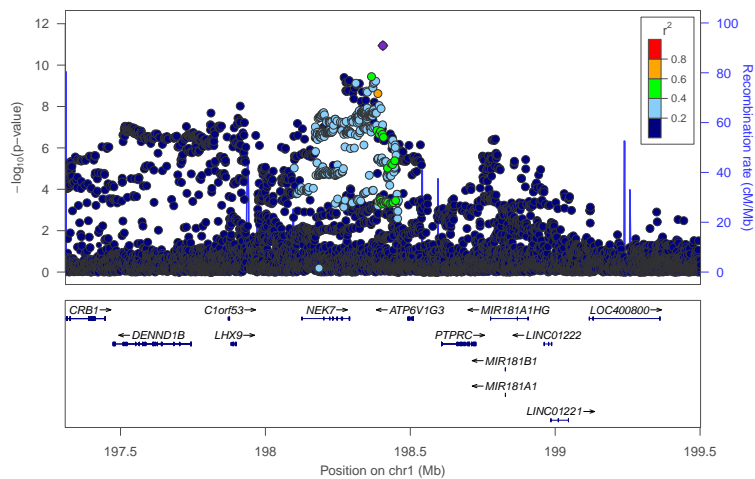

locus 36 rs2016475

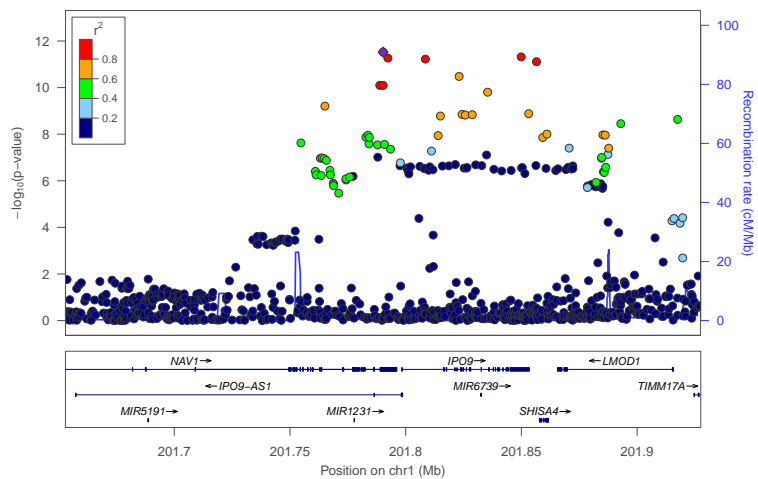

locus 38 rs58649262

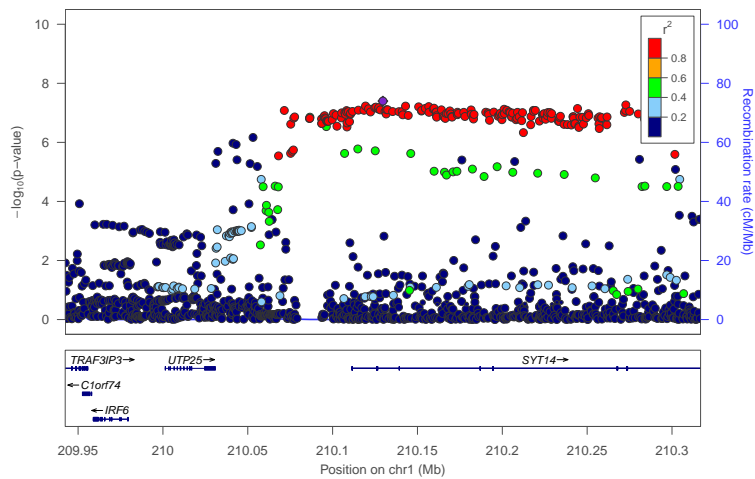

locus 39 rs55946391

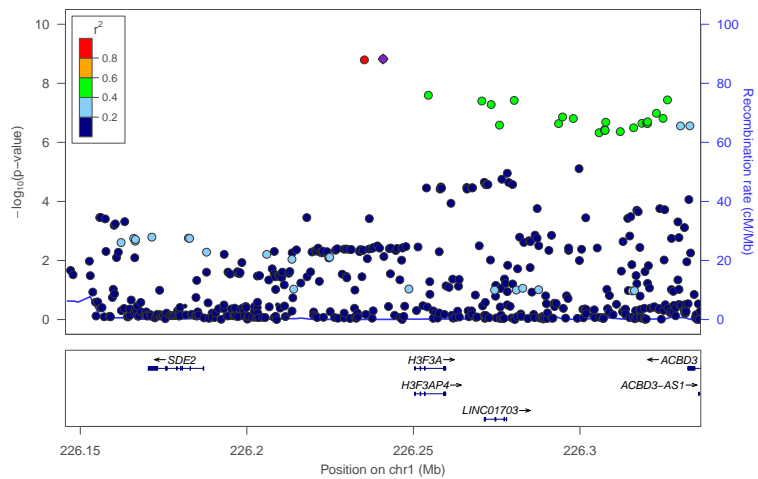

locus 40 rs4653743

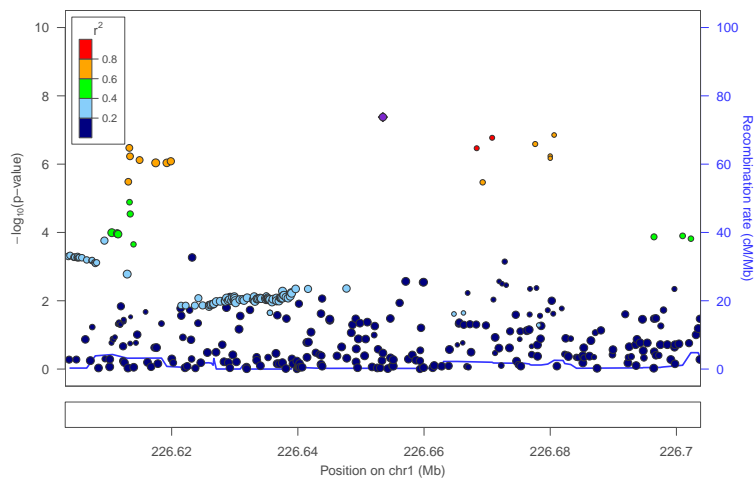

locus 41 rs11807834

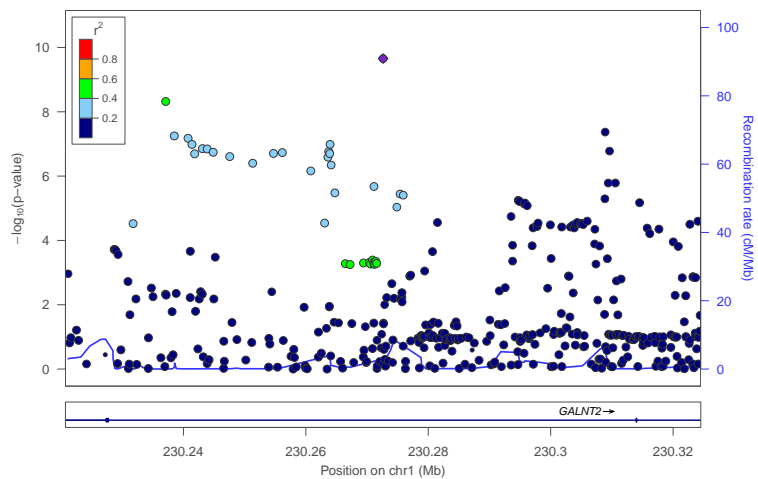

locus 42 rs10927078

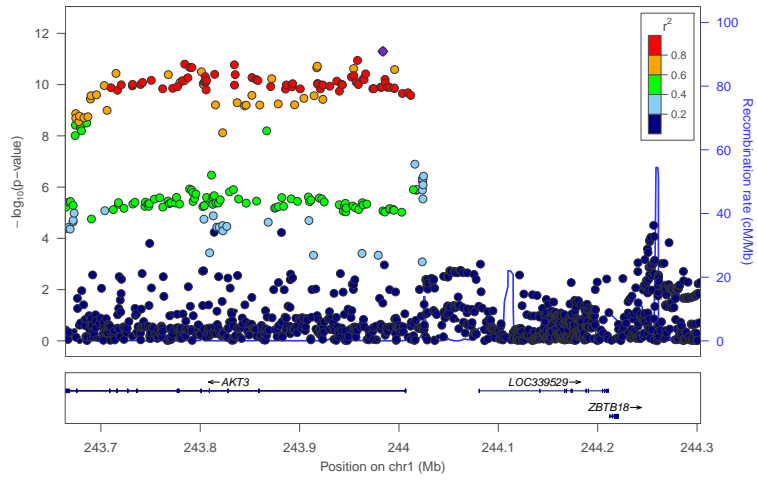

locus 43 rs823248

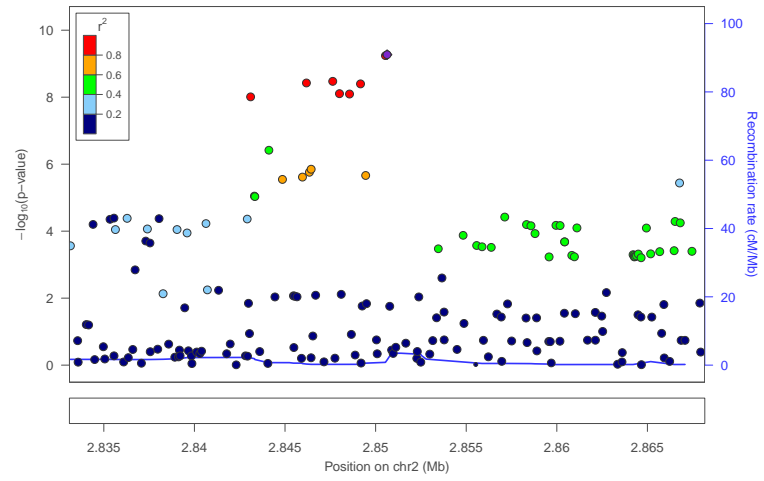

locus 44 rs10185535

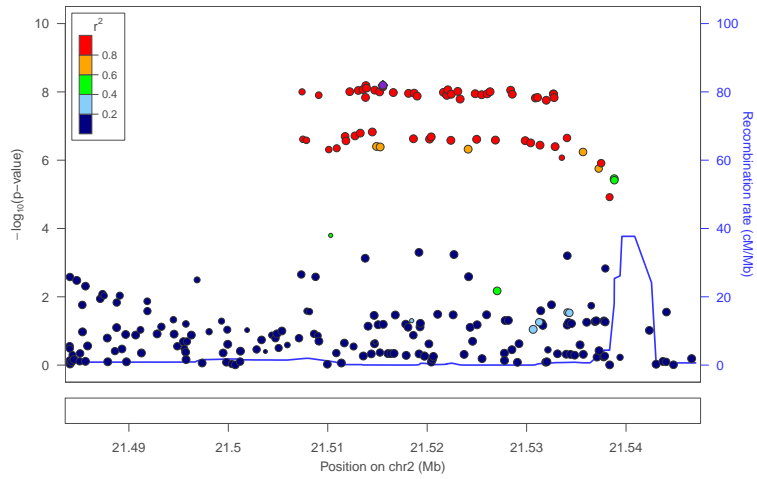

locus 45 rs12617557

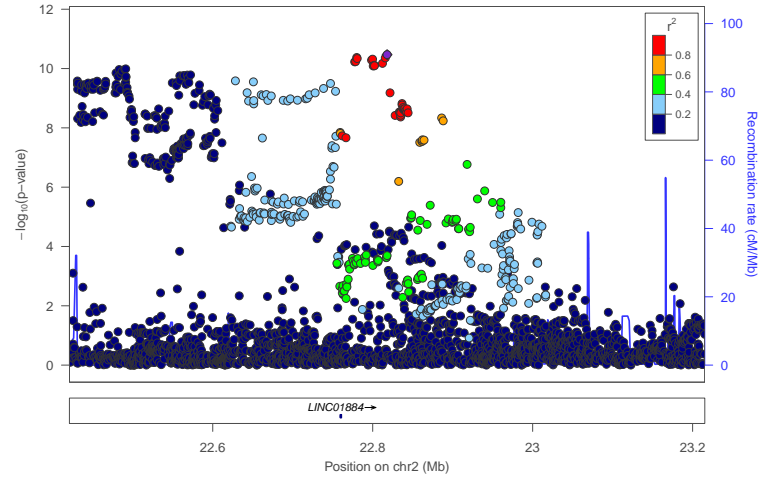

locus 46 rs10204586

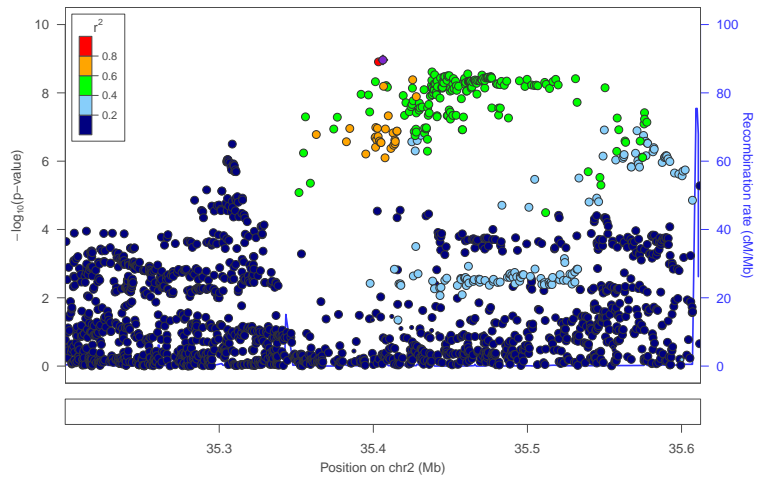

locus 47 rs11903069

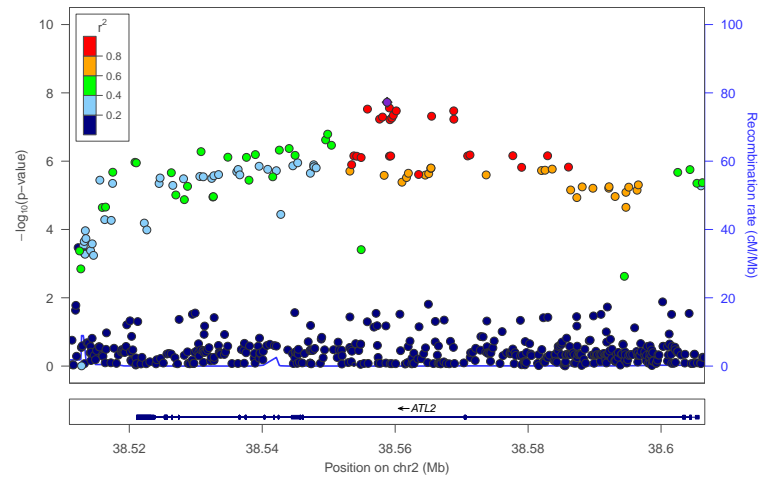

locus 48 rs2374423

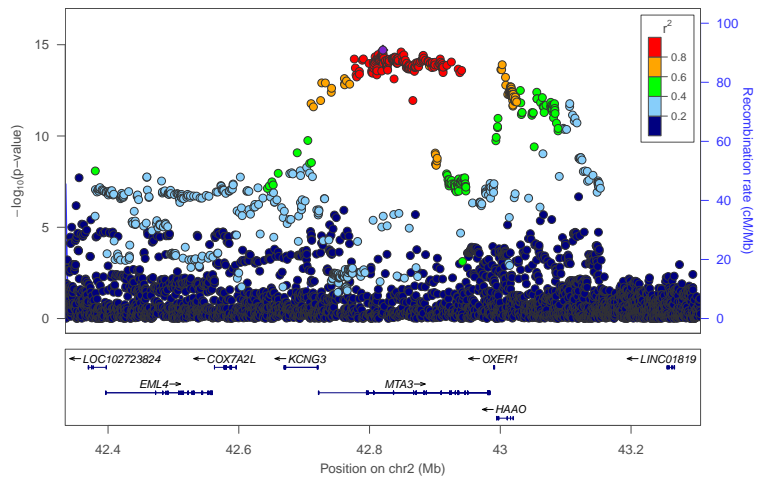

locus 49 rs6720846

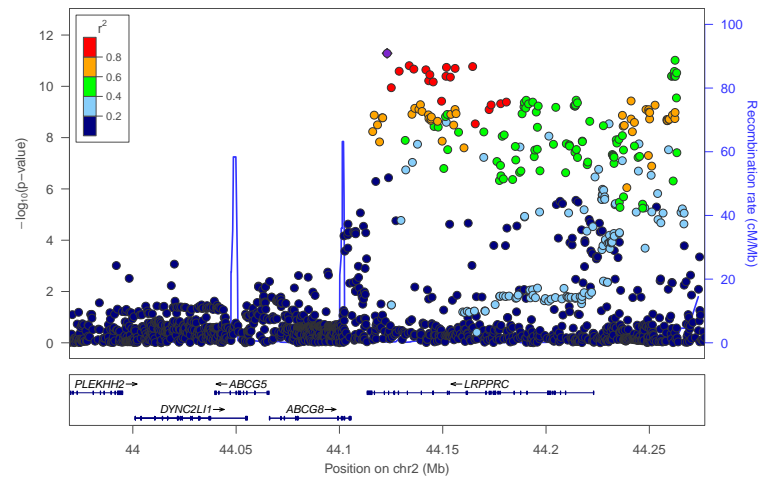

locus 50 rs2881935

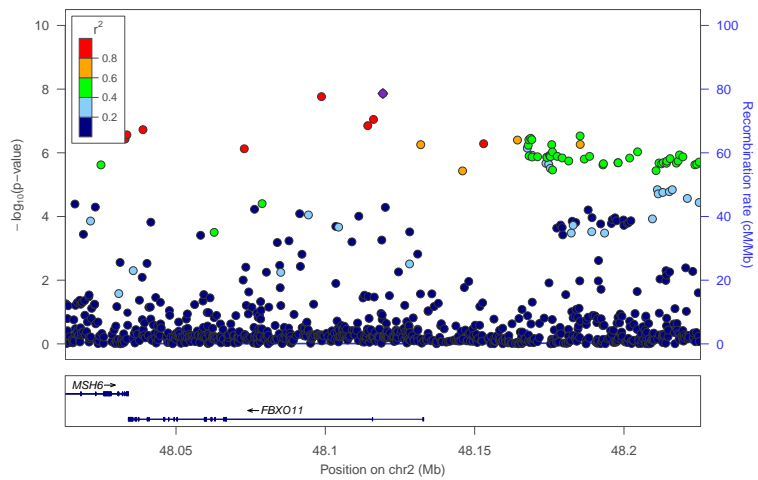

locus 51 rs74431276

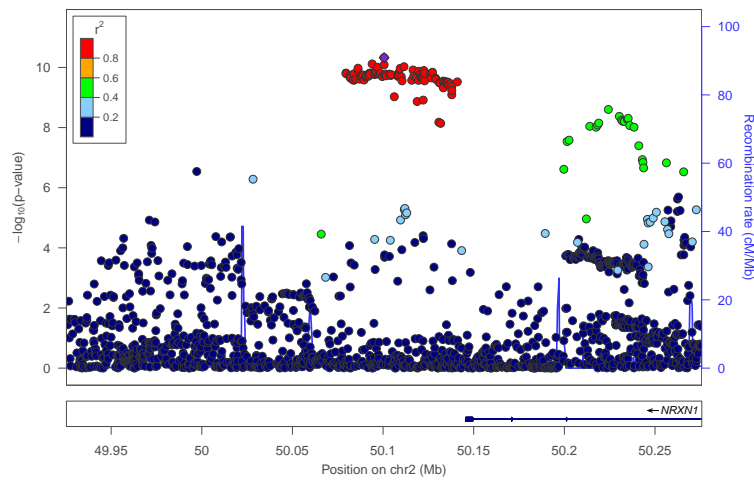

locus 52 rs72807818

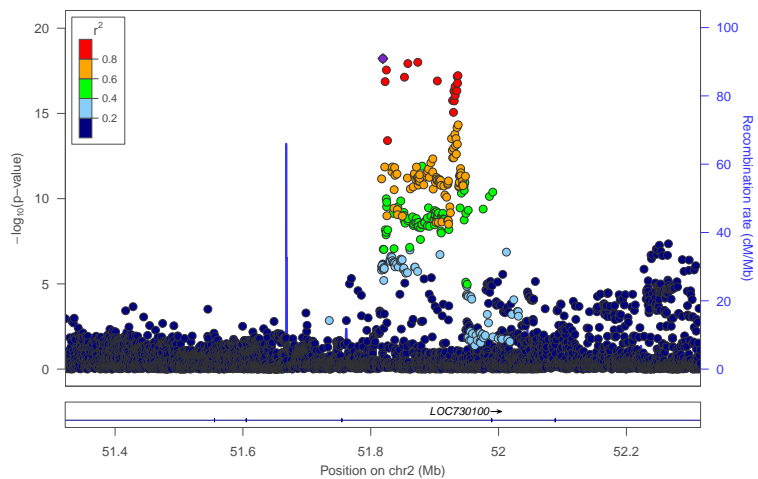

locus 53 rs13404175

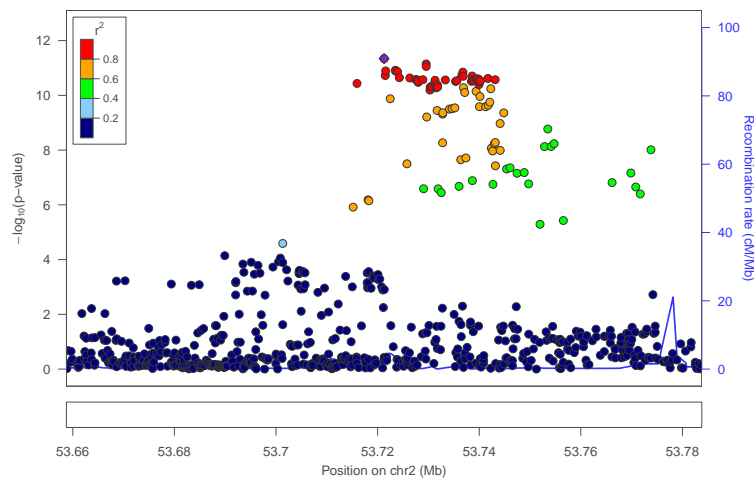

locus 54 rs12468708

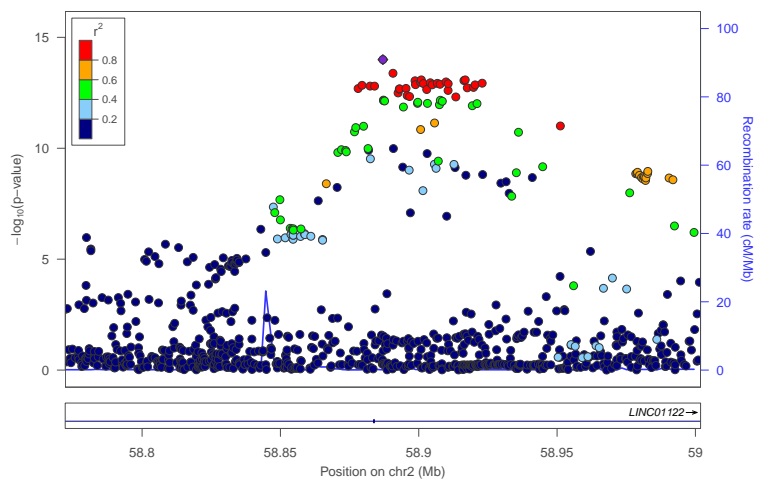

locus 55 rs359247

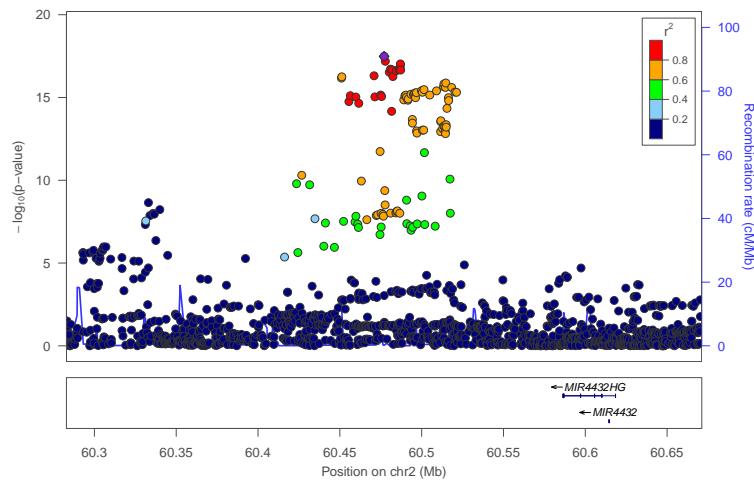

locus 56 rs13015703

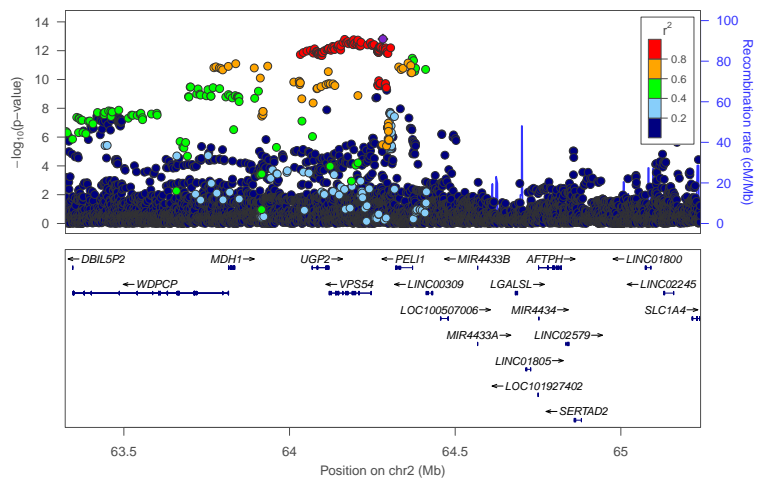

locus 57 rs62144053

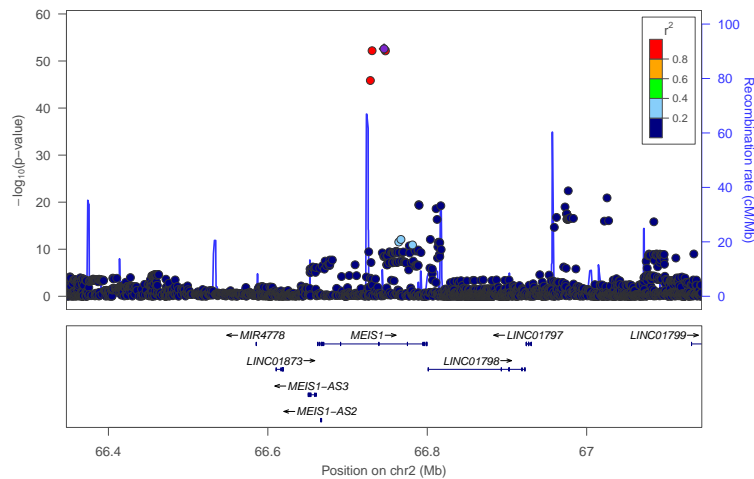

locus 58 rs2861752

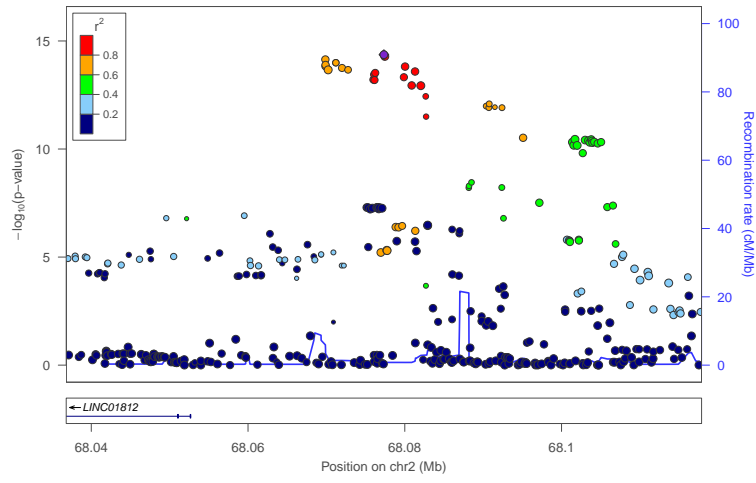

locus 59 rs62149809

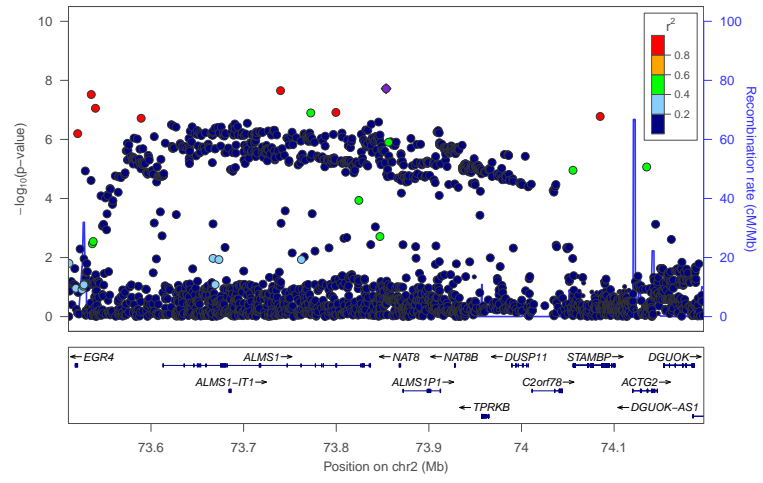

locus 60 rs4538233

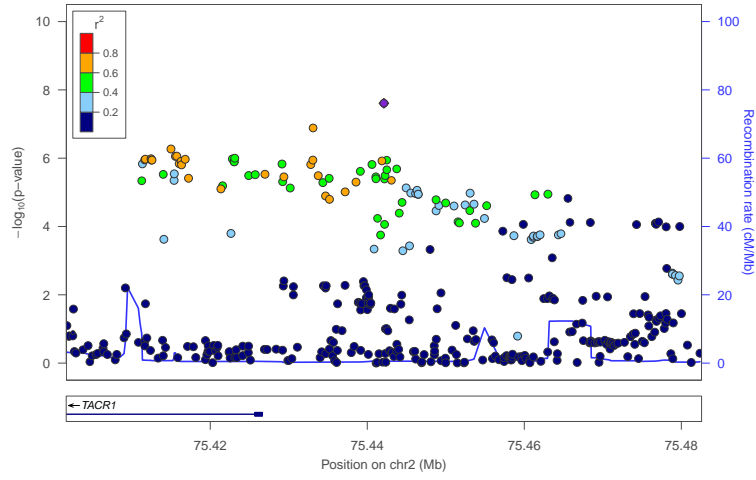

locus 61 rs6761838

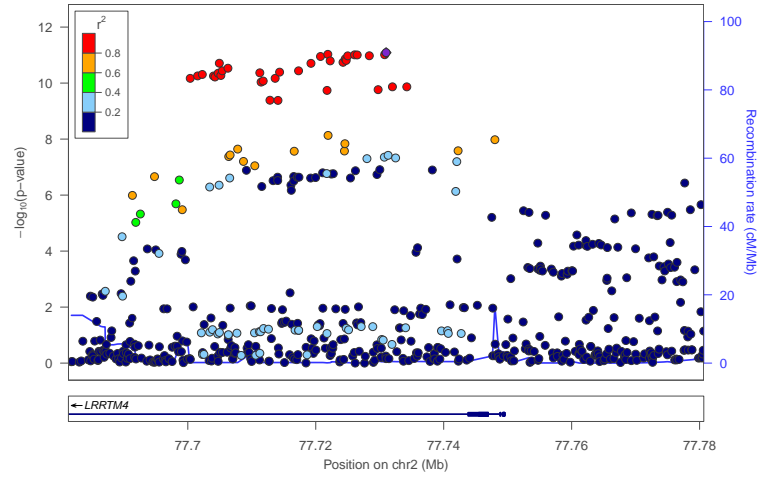

locus 62 rs6724539

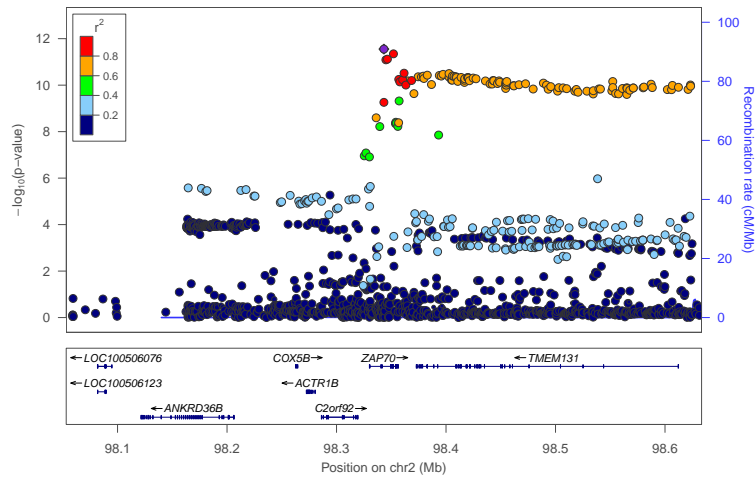

locus 63 rs6735012

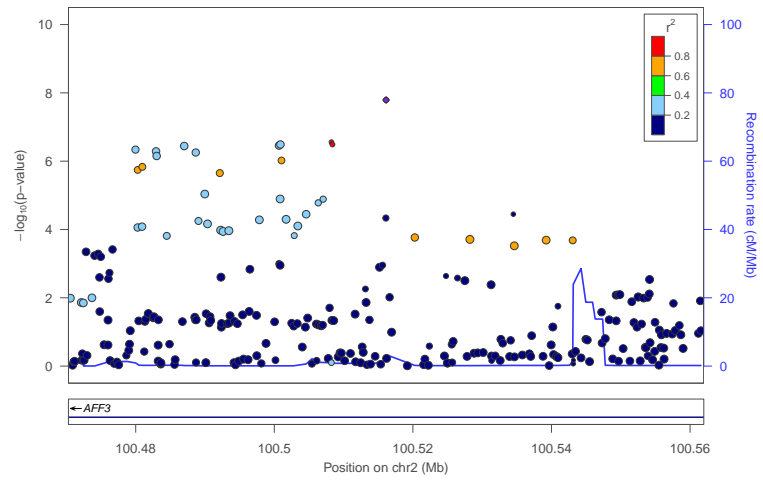

locus 64 rs4402784

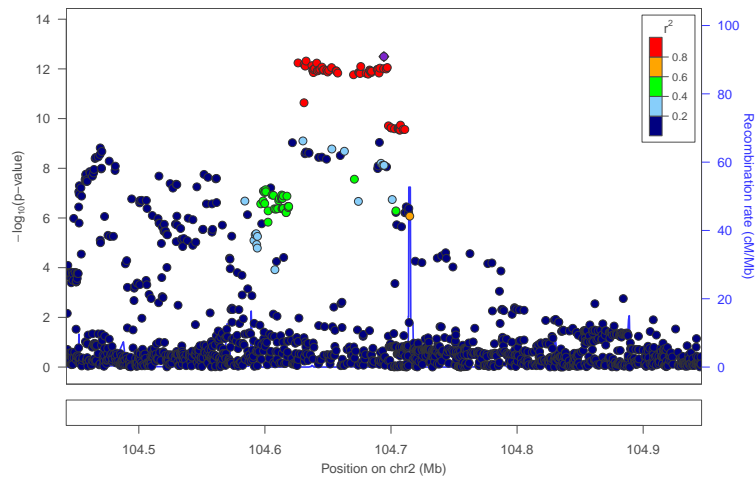

locus 65 rs62158170

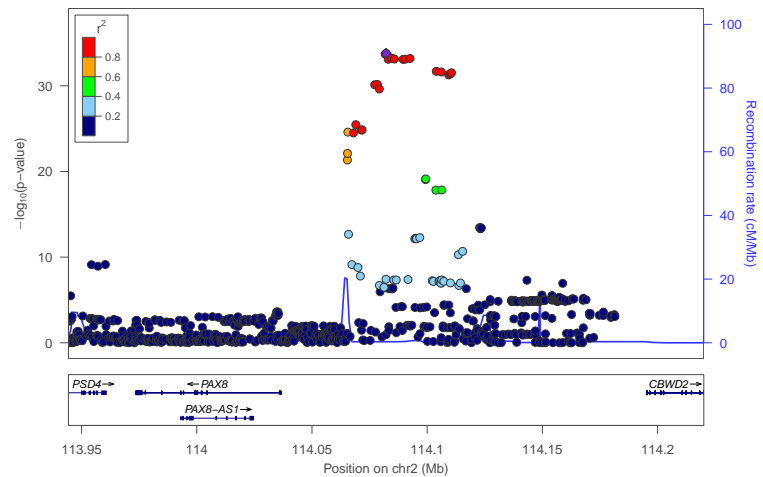



locus 66 rs2432721

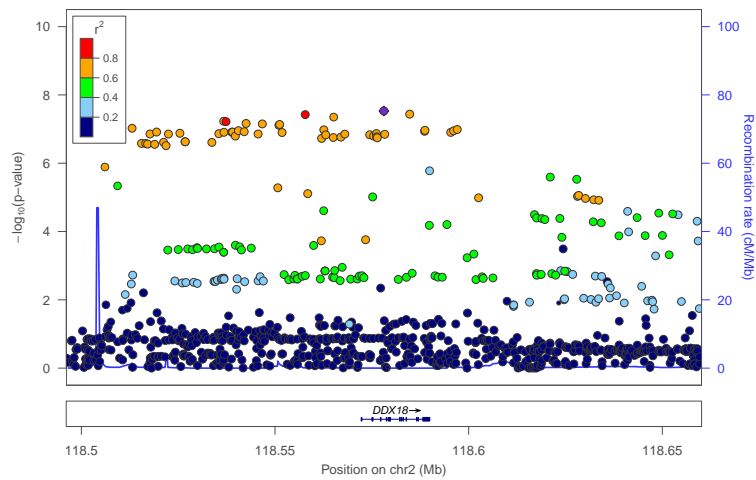

locus 67 rs4848524

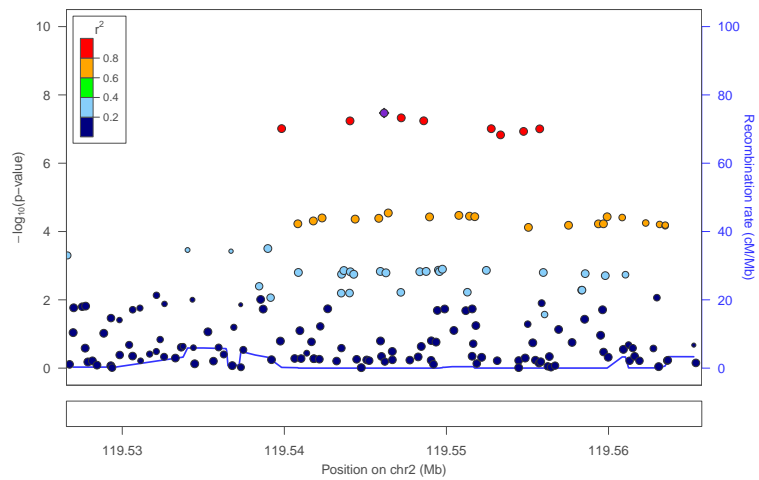

locus 68 rs12618343

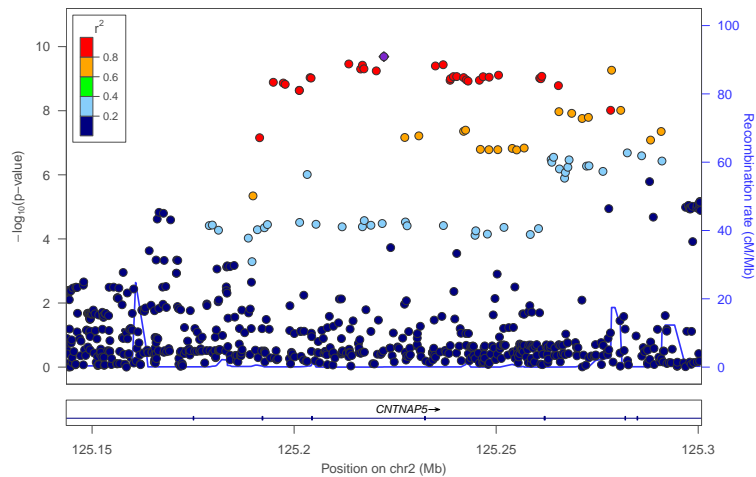

locus 69 rs773875123

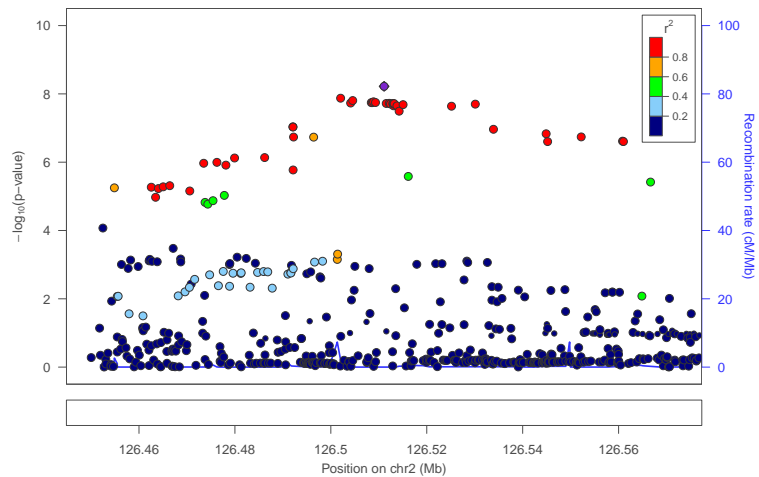

locus 70 rs13415724

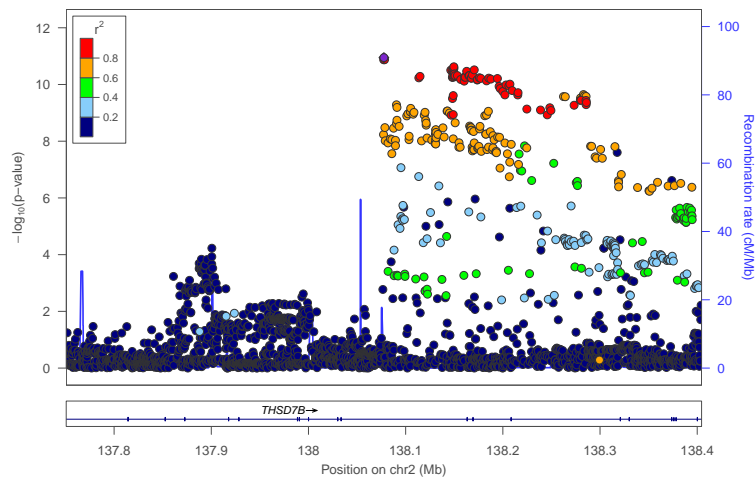

locus 71 rs78154941

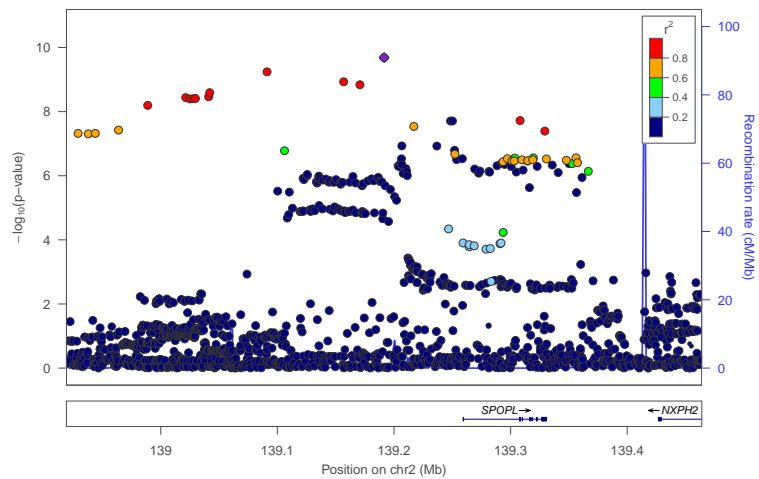

locus 72 rs1437334

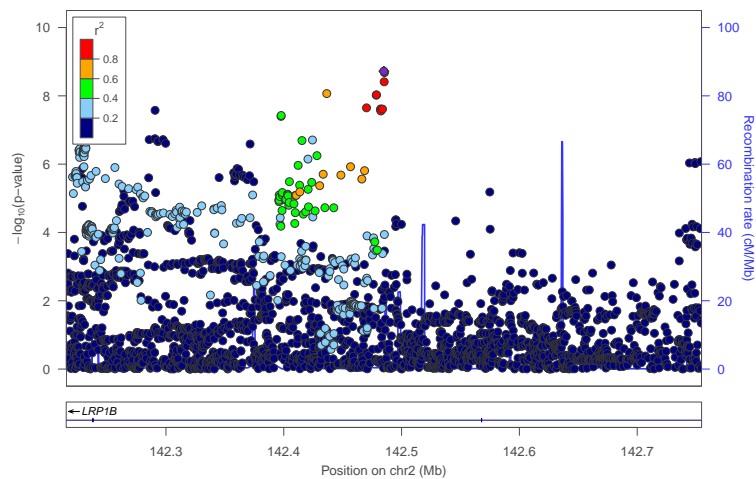

locus 73 rs13001483

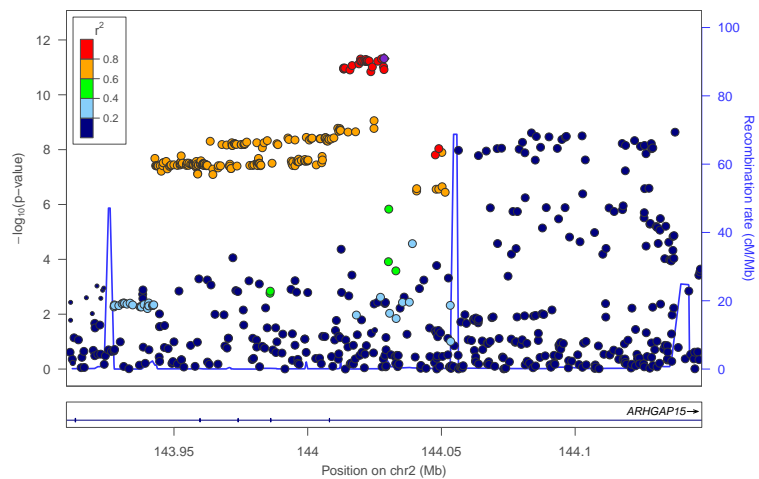

locus 74 rs7607770

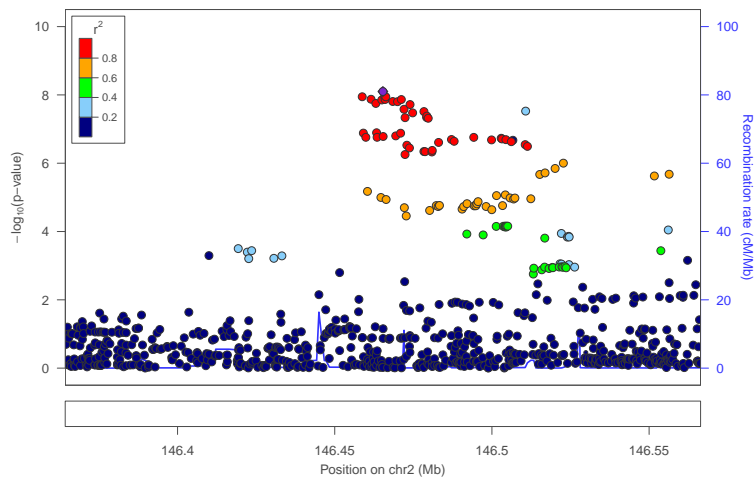

locus 75 rs62167788

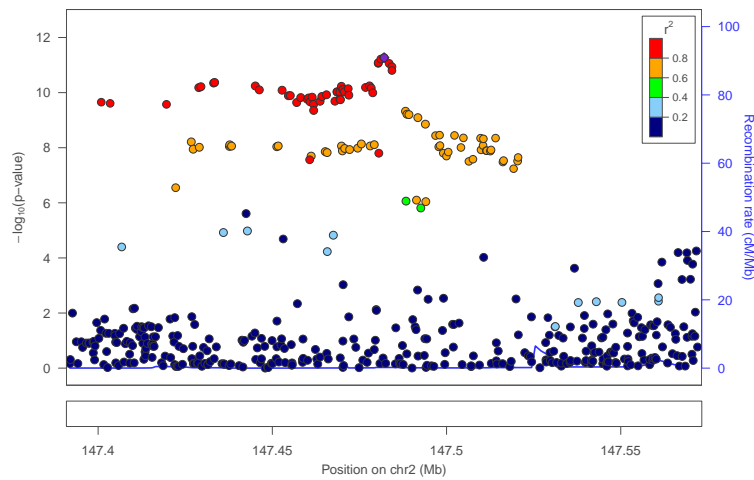

locus 76 2:148658595:A\_G

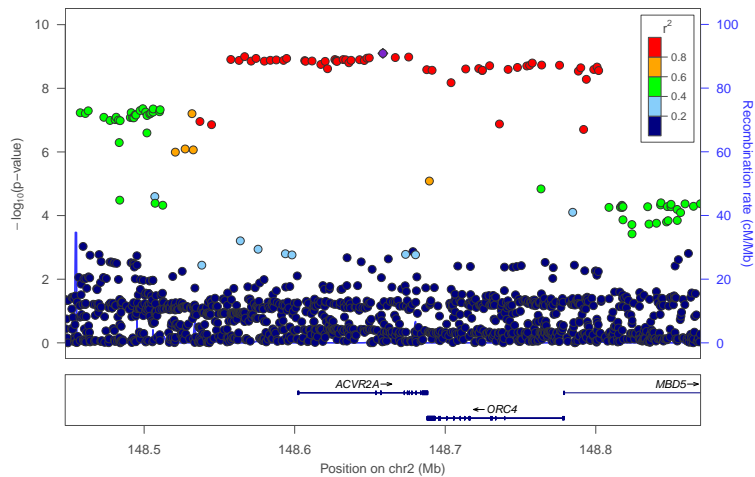

locus 77 rs77276698

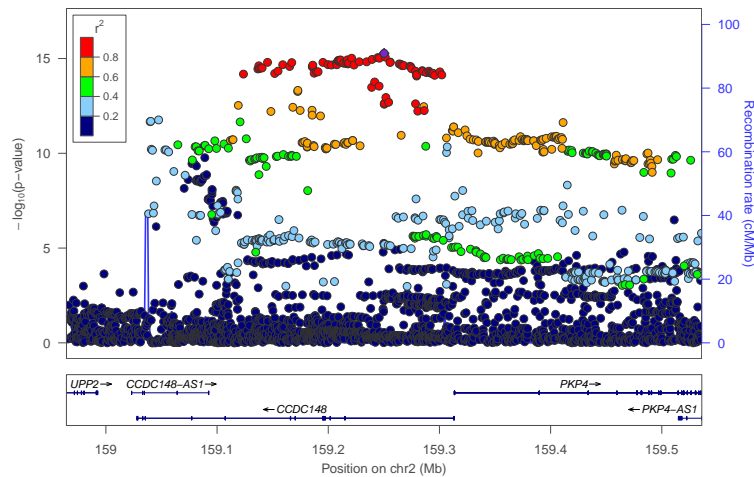

locus 78 rs1549577

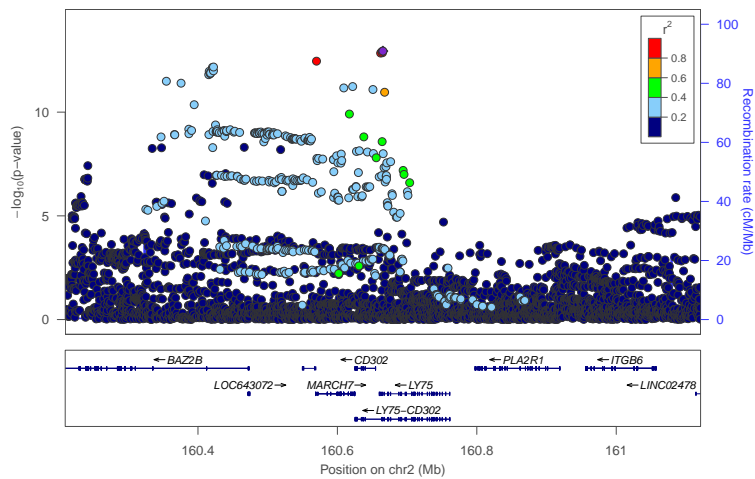

locus 79 rs1267070

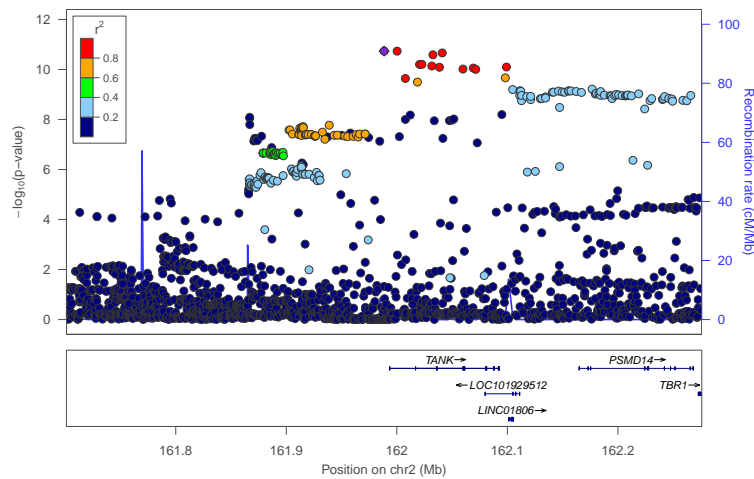

locus 80 rs11683458

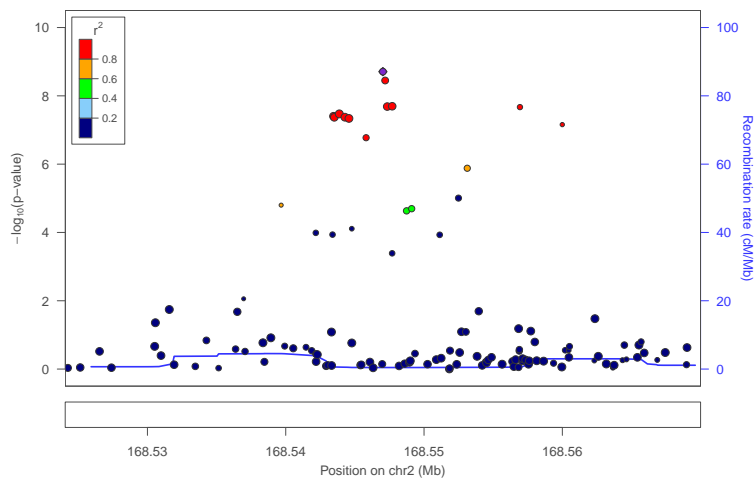

locus 81 rs10930502

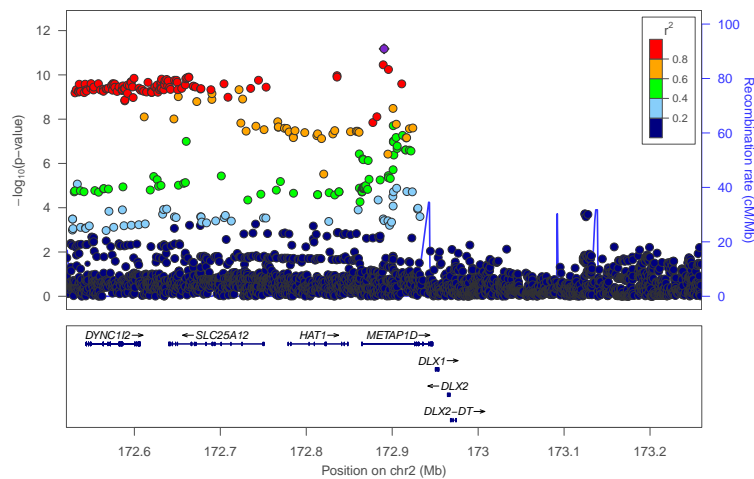

locus 82 rs836603

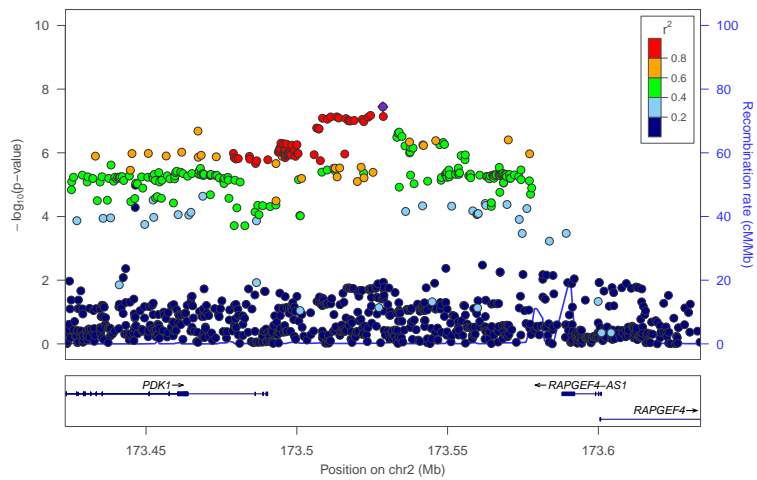

locus 83 rs2884836

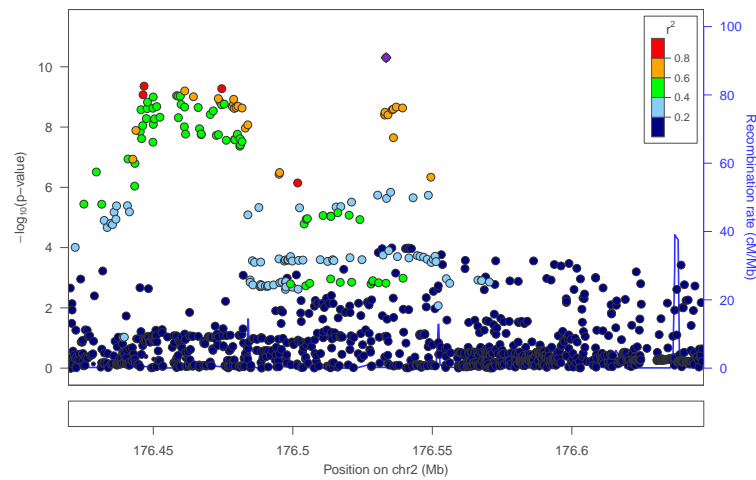

locus 84 rs2123641

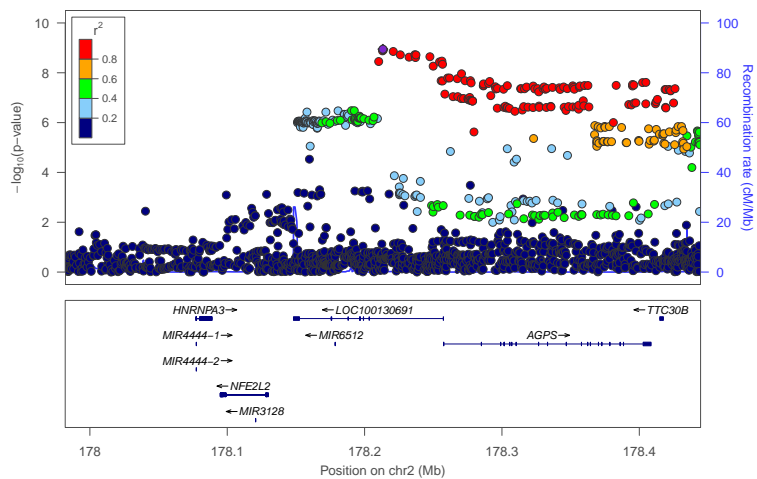

locus 85 rs10497655

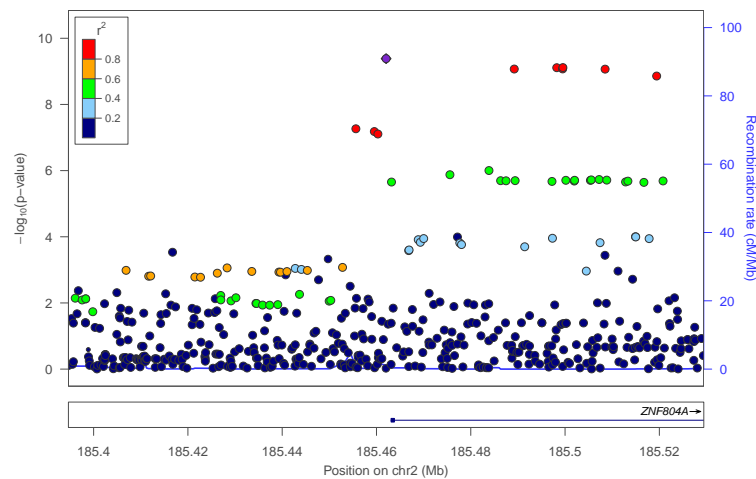

locus 86 rs1064213

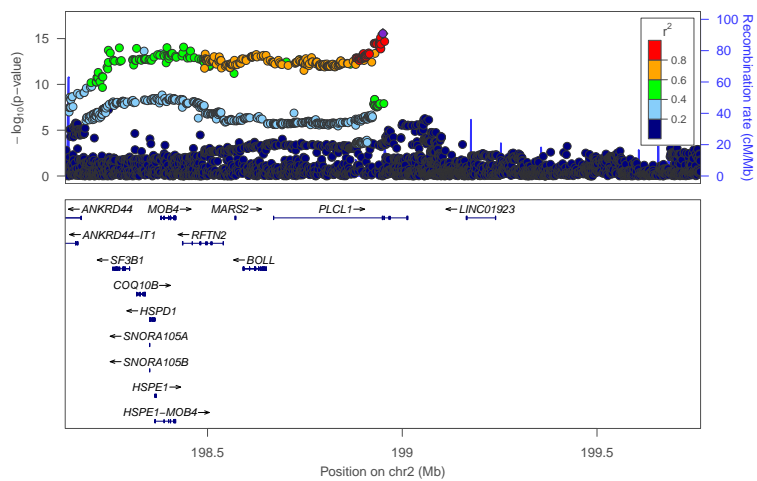

locus 87 rs60431238

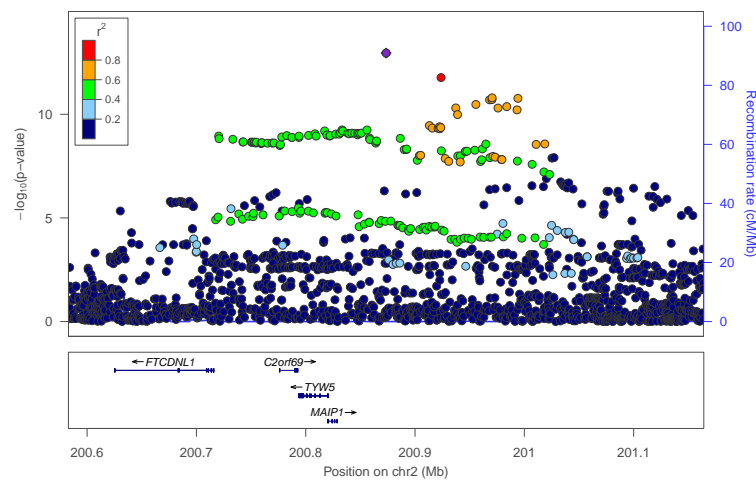

locus 88 rs145664840

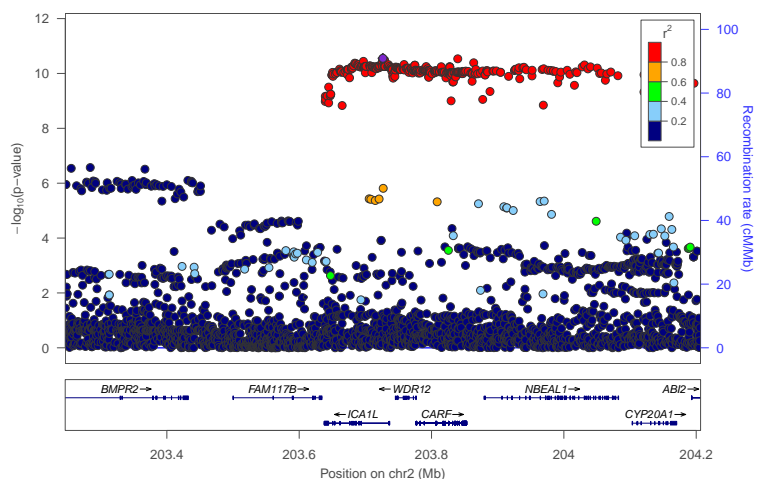

locus 89 rs10187826

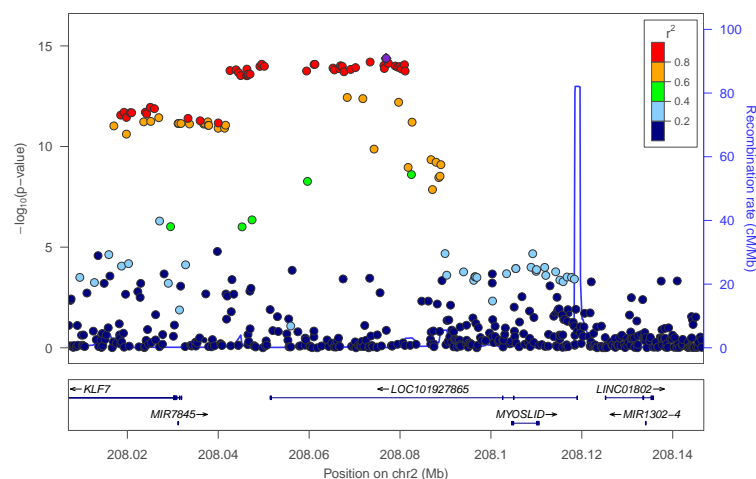

locus 90 rs62184481

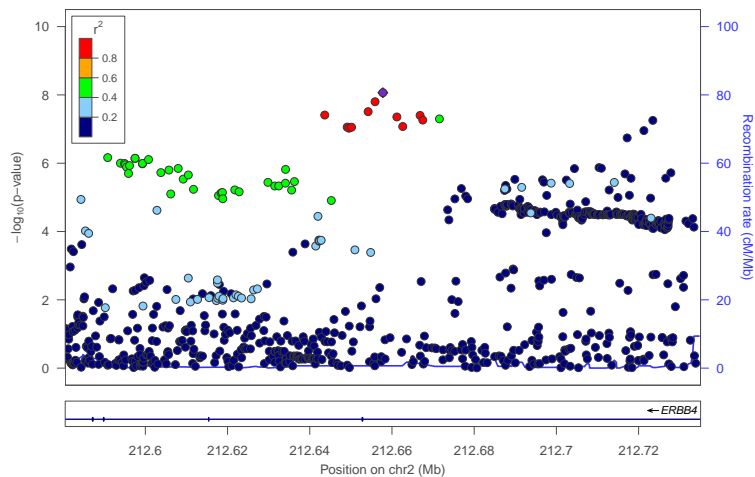

locus 91 rs34967082

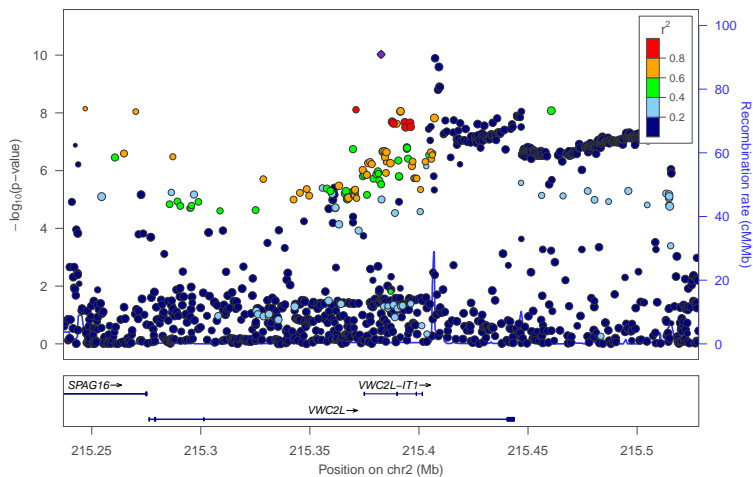

locus 92 rs62178707

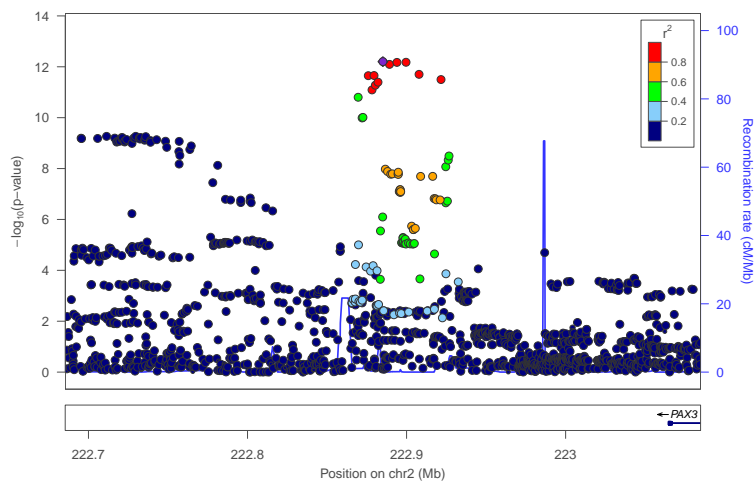

locus 93 rs11897824

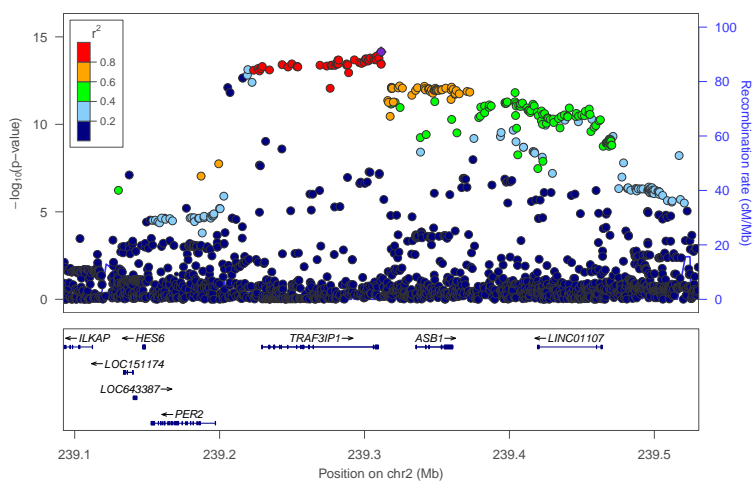

locus 94 rs4455151

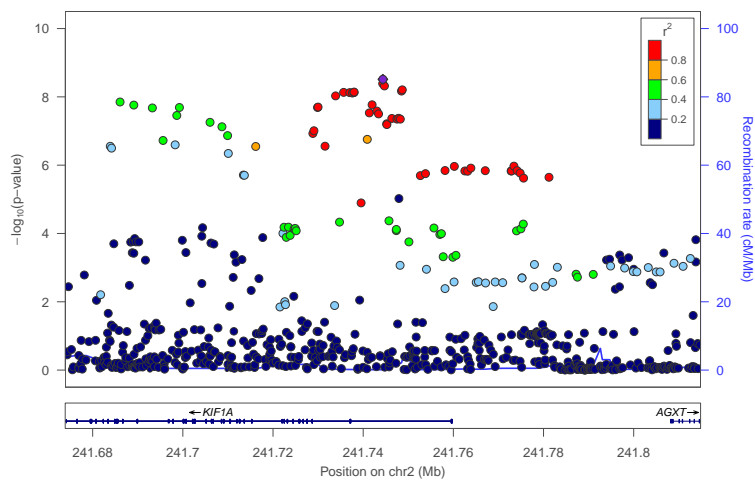

locus 95 rs2729303

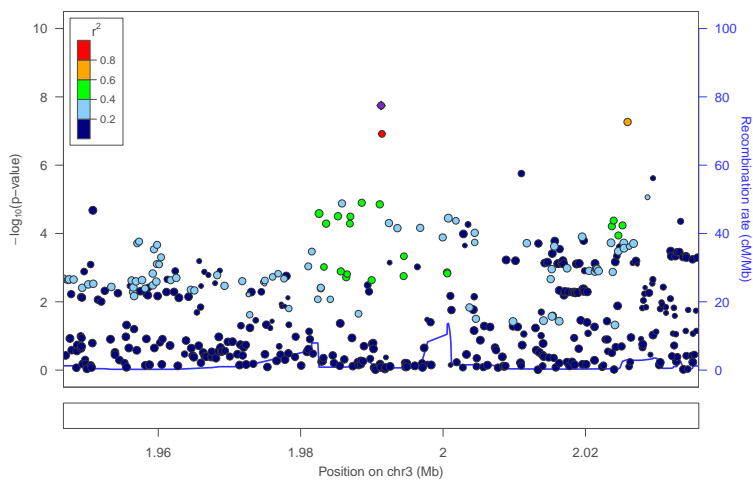

locus 96 rs76901635

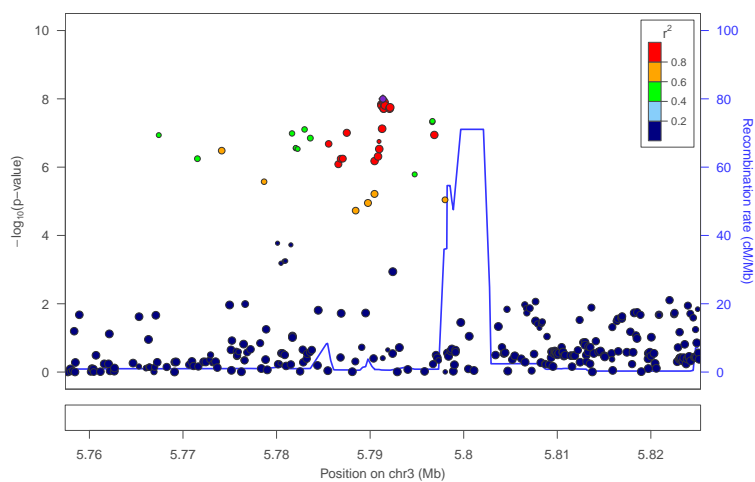

locus 97 rs78838624

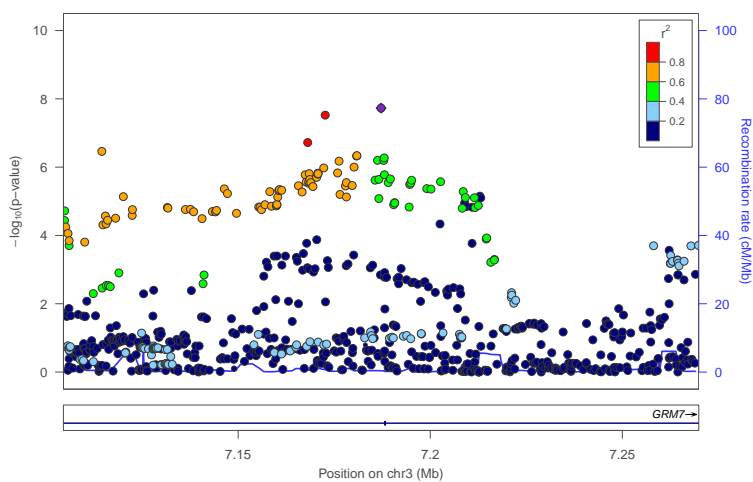



locus 98 rs6774026

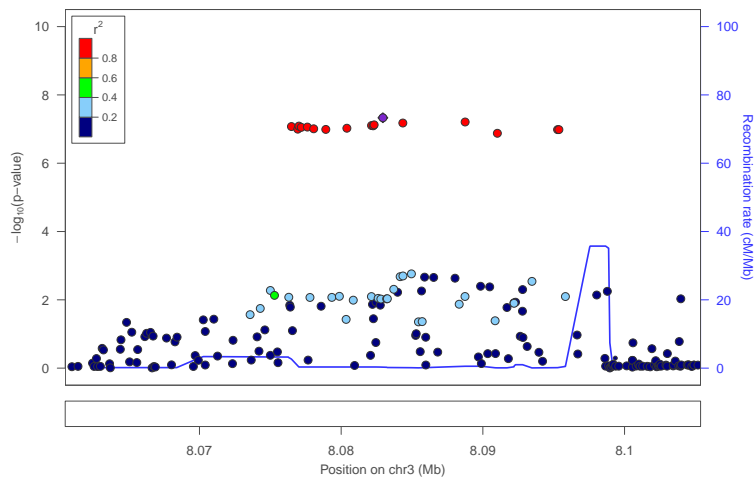

locus 99 rs4383496

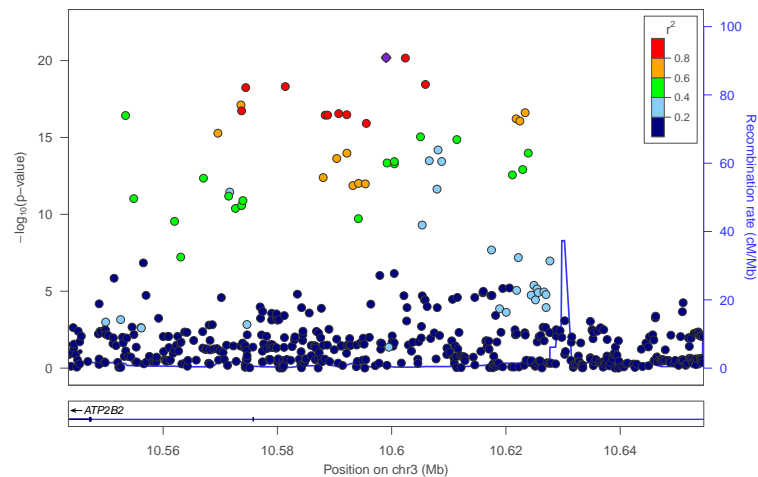

locus 100 rs9653970

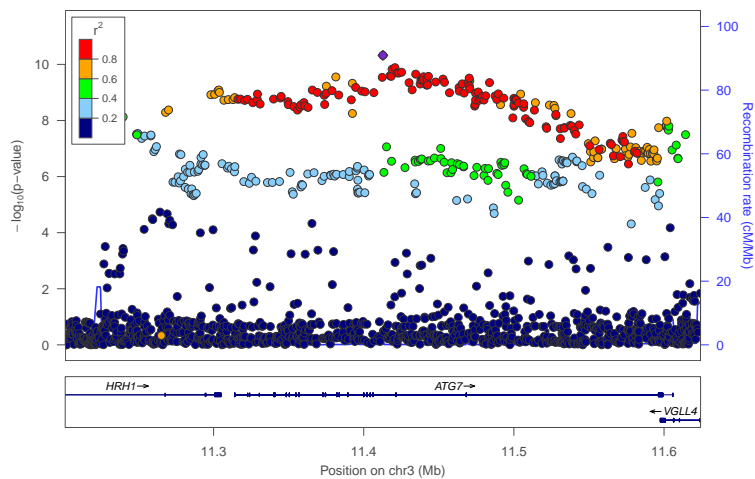

locus 101 rs9838564

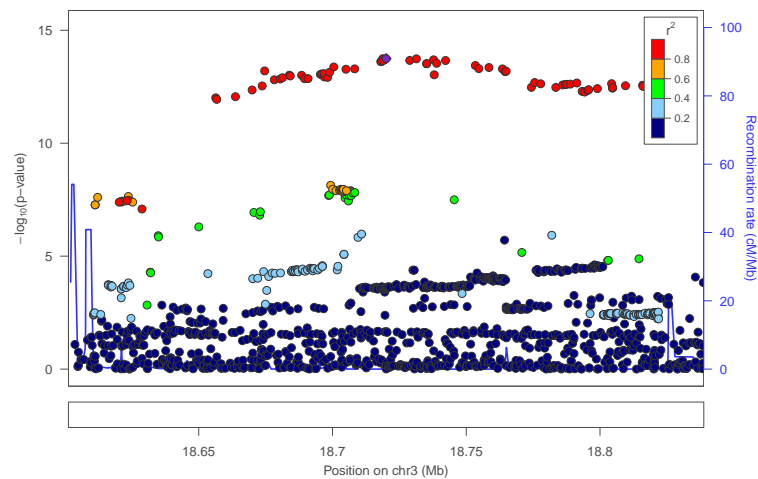

locus 102 rs4858241

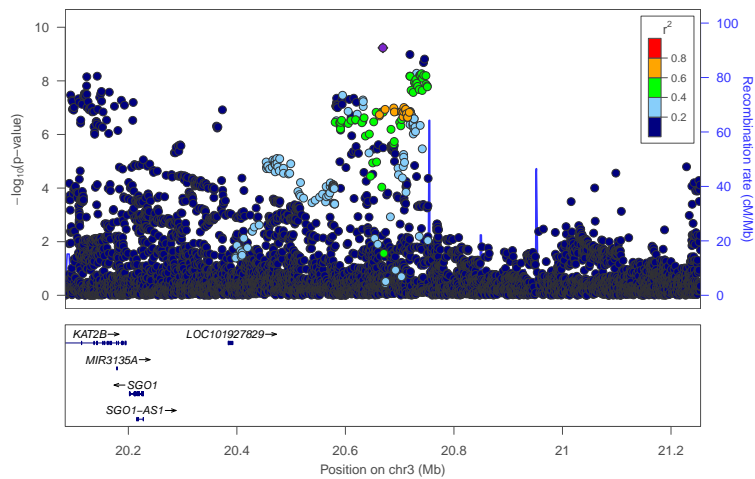

locus 103 rs1603985

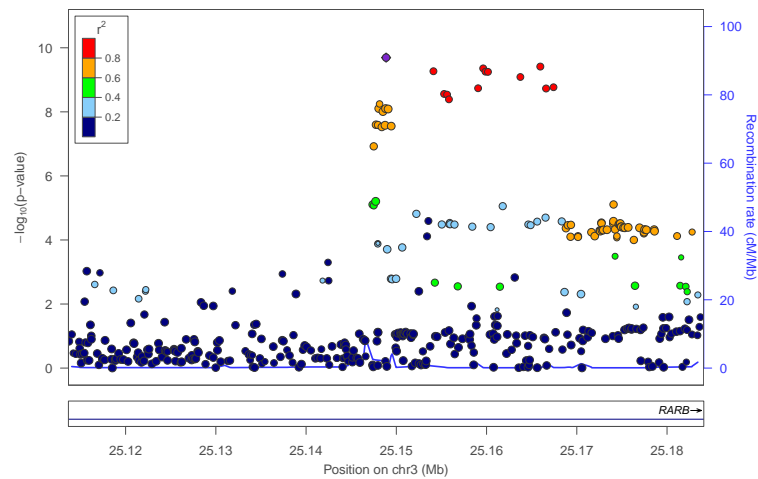

locus 104 rs2122231

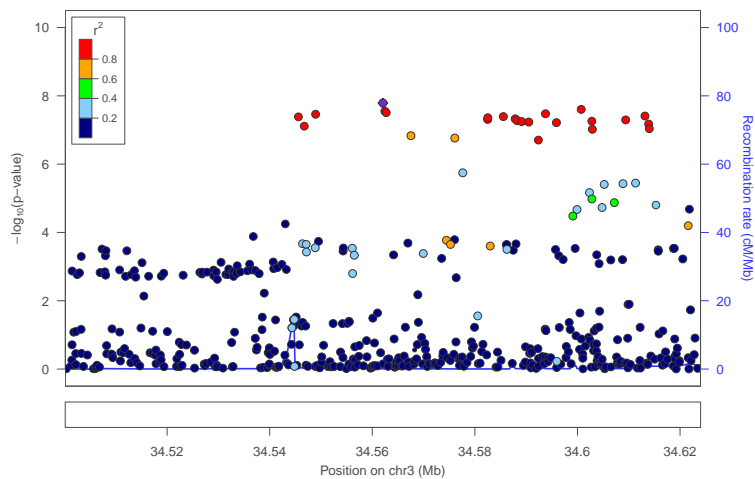

locus 105 rs9875582

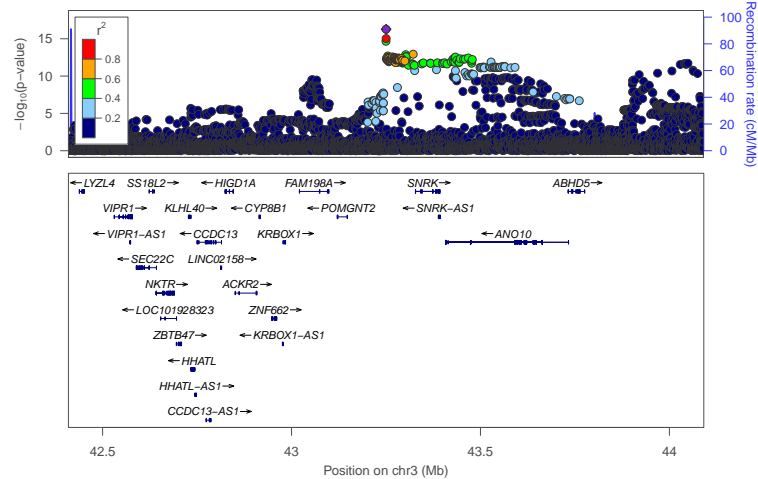

locus 106 rs3755831

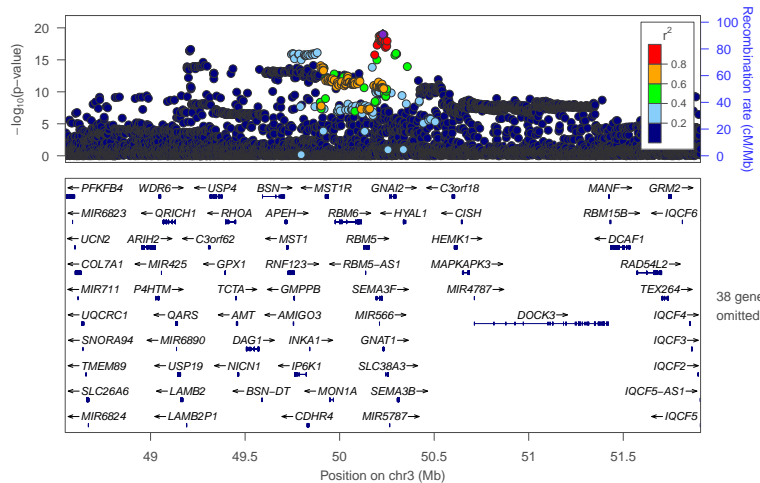

locus 107 rs62252339

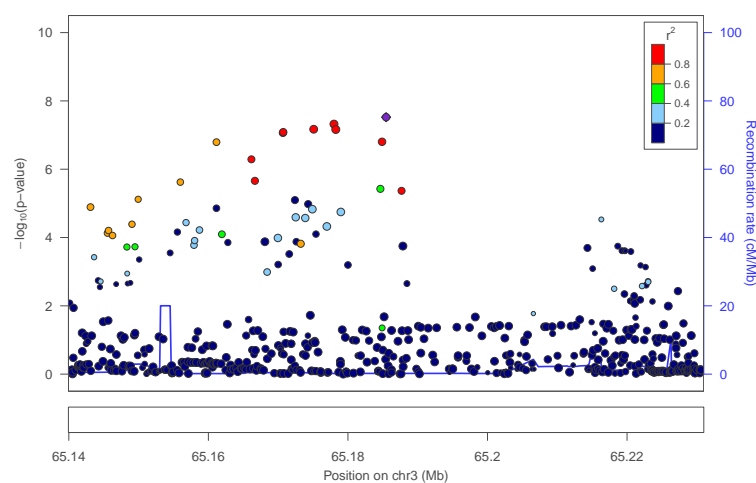

locus 108 rs6762926

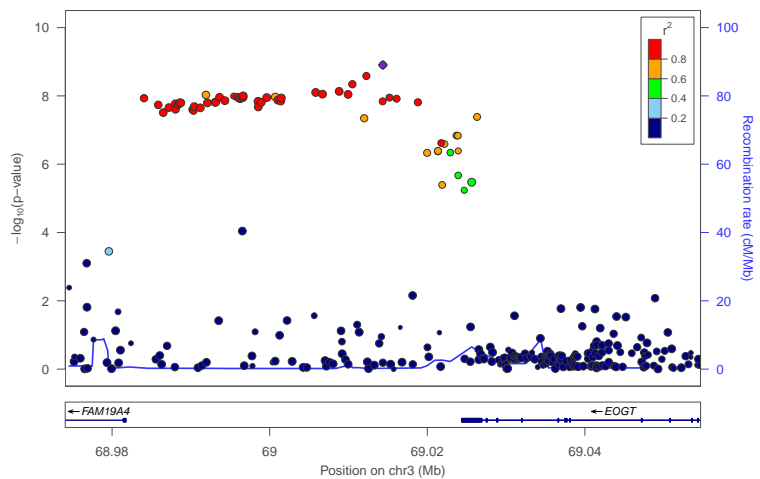

locus 109 rs67588220

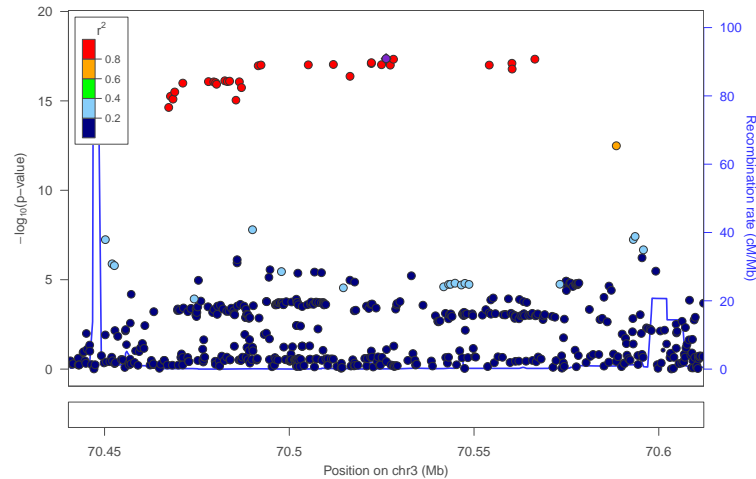

locus 110 rs115433278

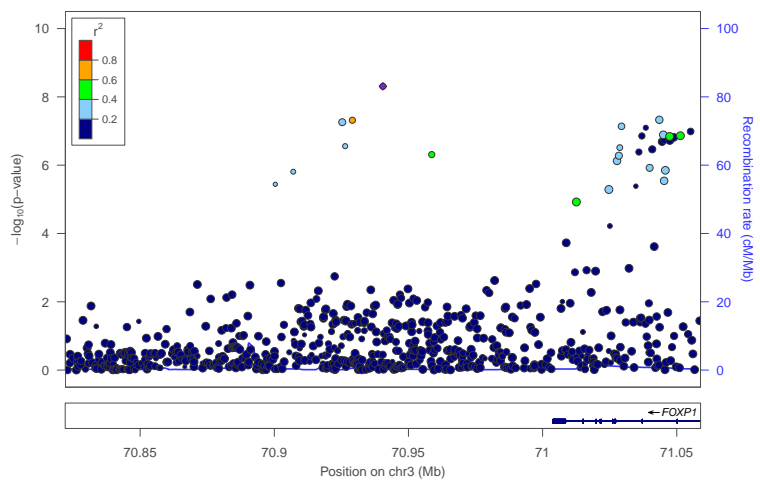

locus 111 rs1864896

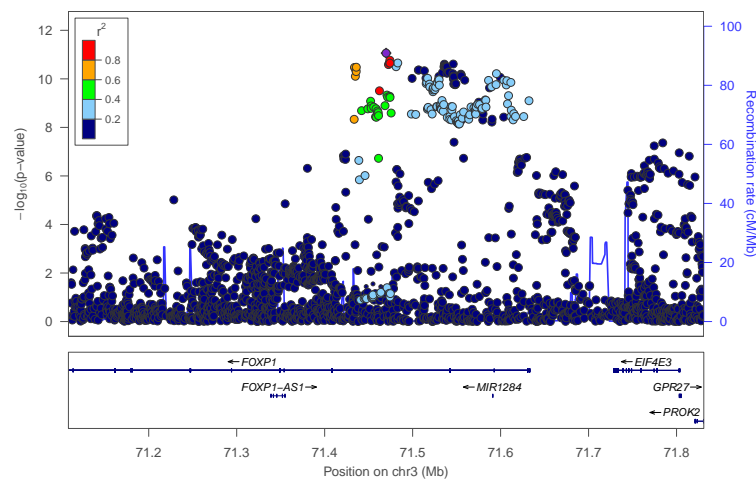

locus 112 rs113757655

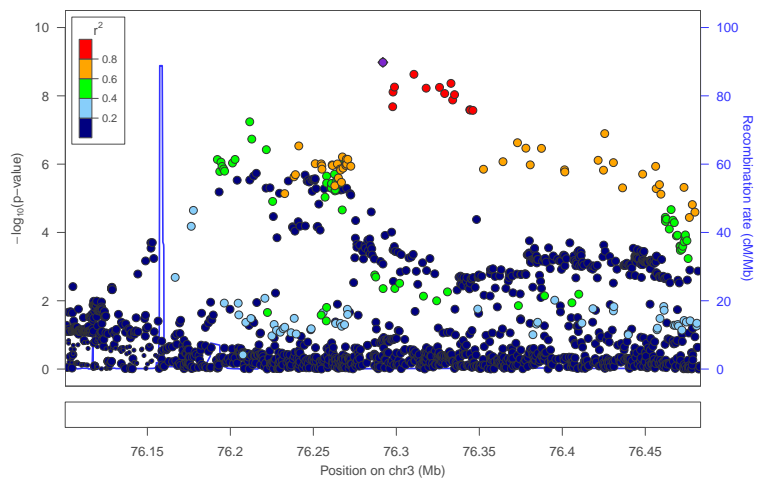

locus 113 rs11425226

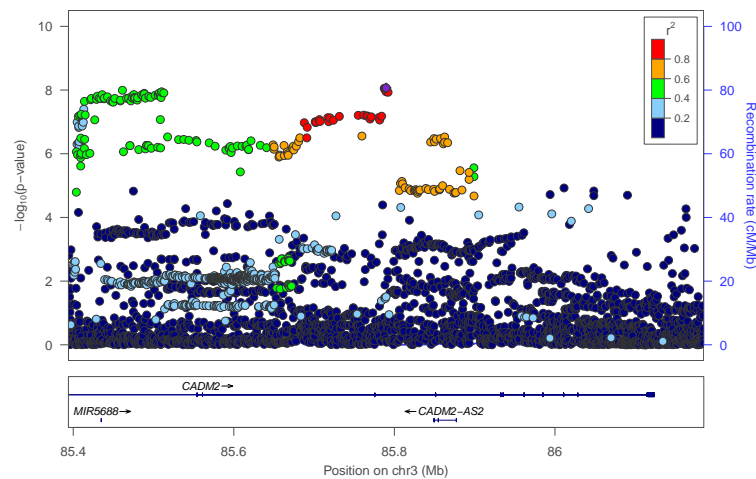

locus 114 rs13093657

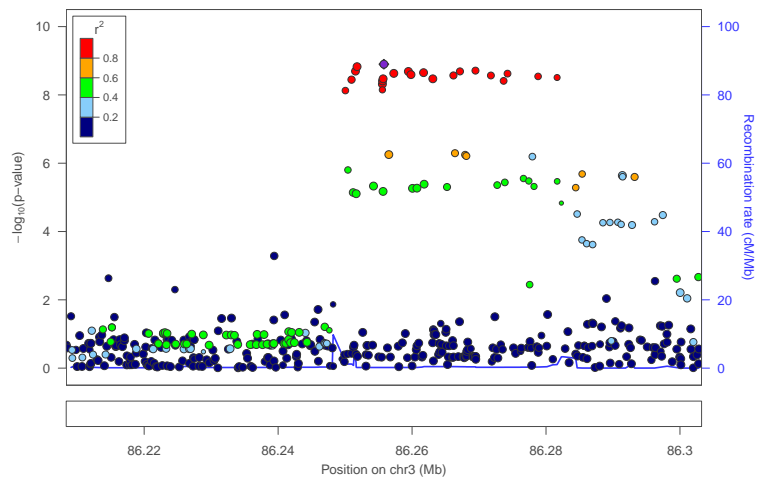

locus 115 rs147012818

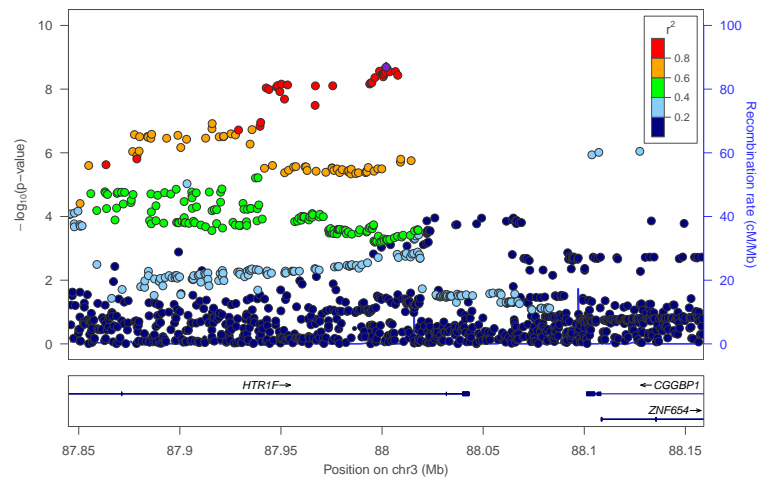

locus 116 rs78531597

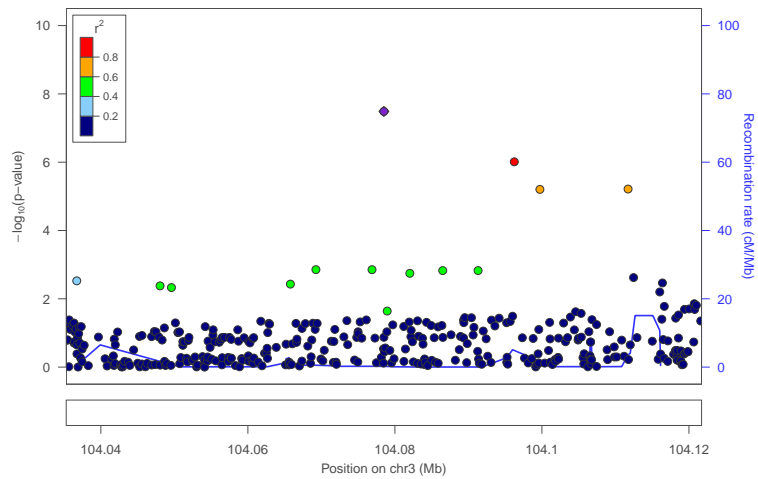

locus 117 rs2016469

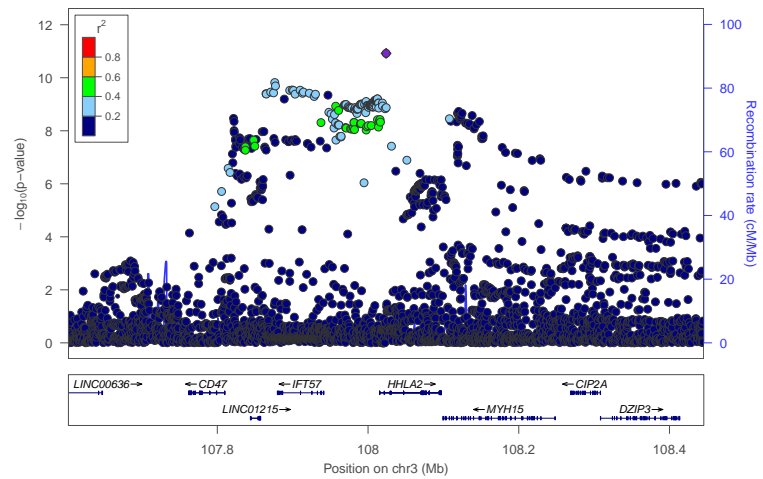

locus 118 rs7619638

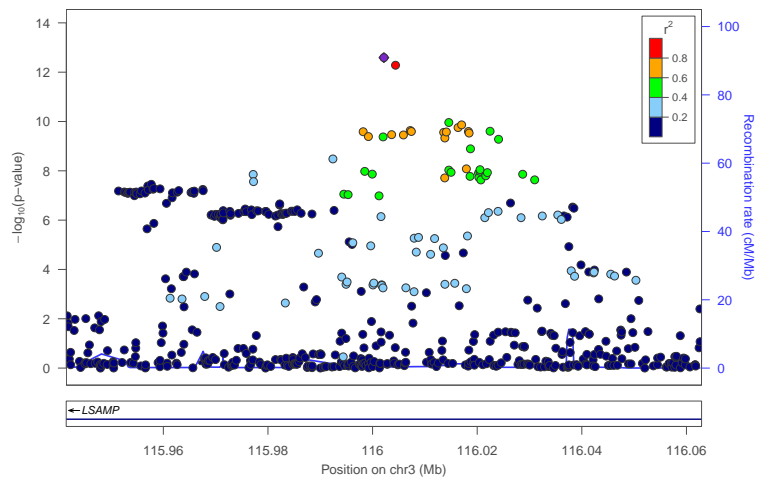

locus 119 rs9815484

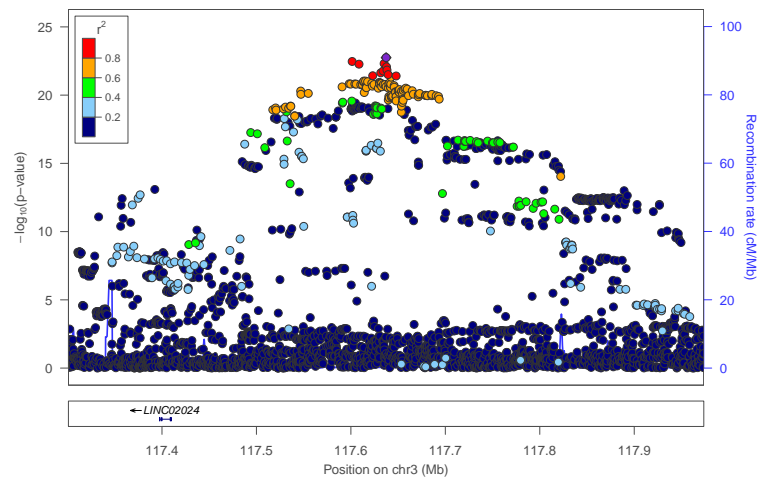

locus 120 rs75869405

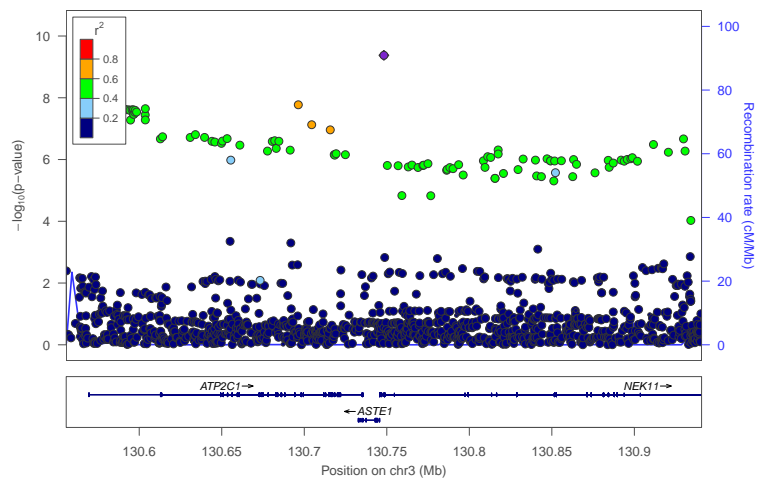

locus 121 rs67294685

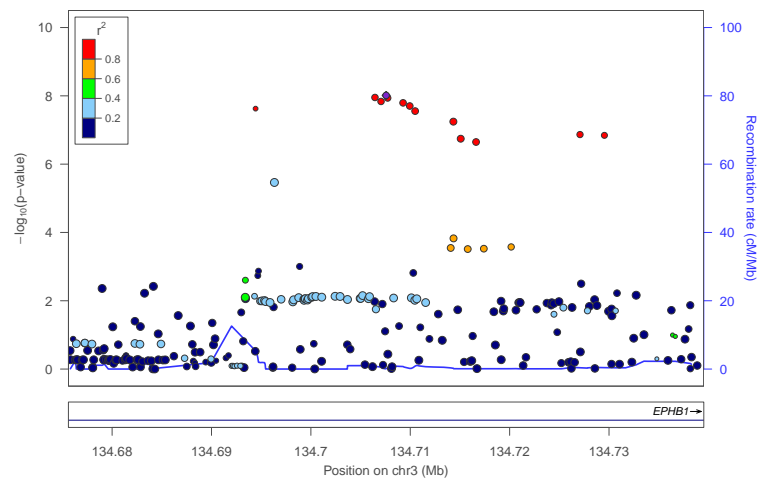

locus 122 rs4681358

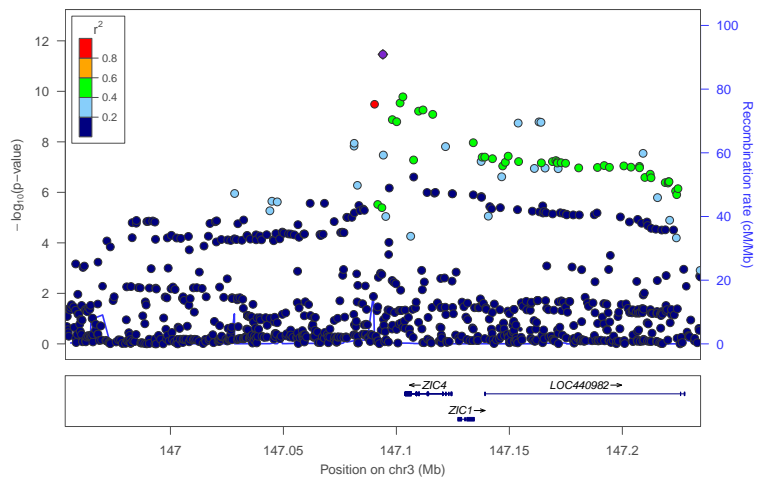

locus 123 rs55827025

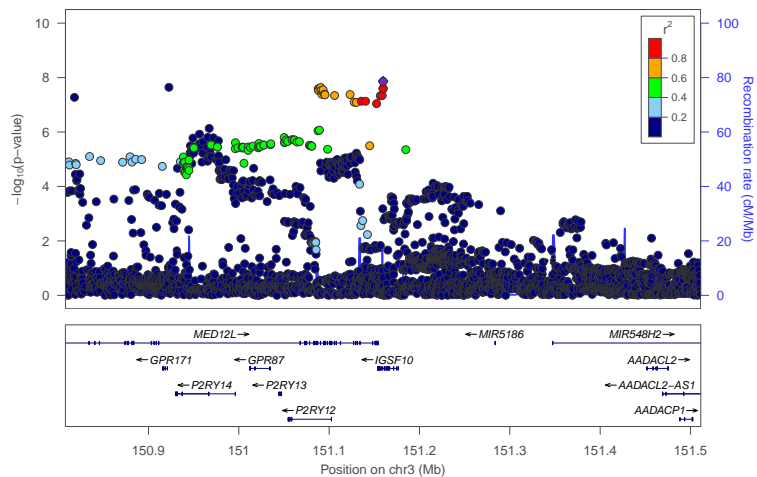

locus 124 rs9872362

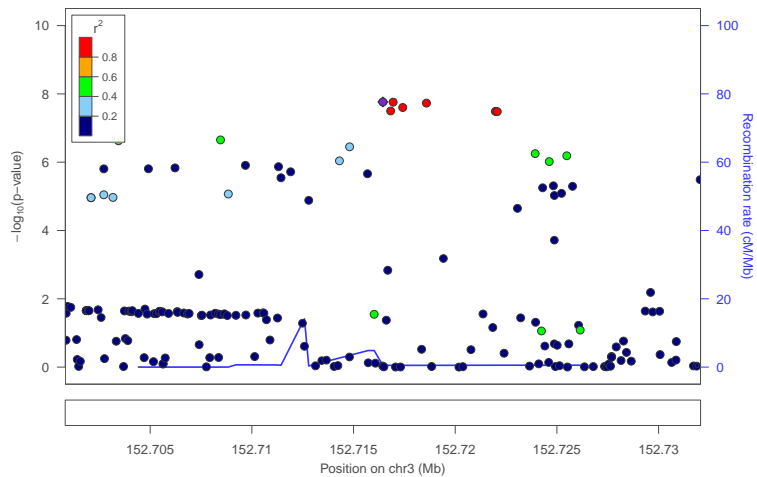

locus 125 rs13095140

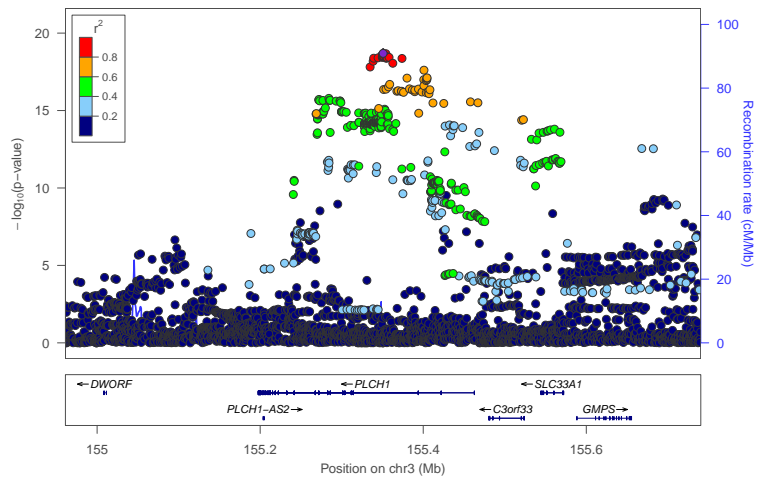

locus 126 rs2306531

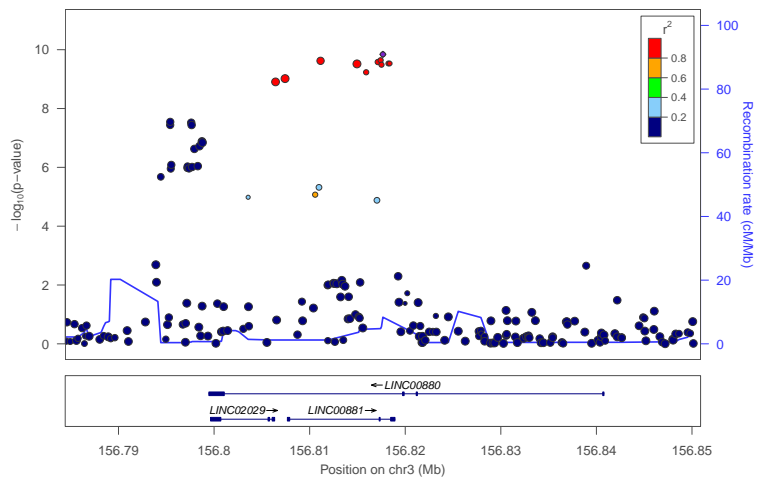

locus 127 rs34995891

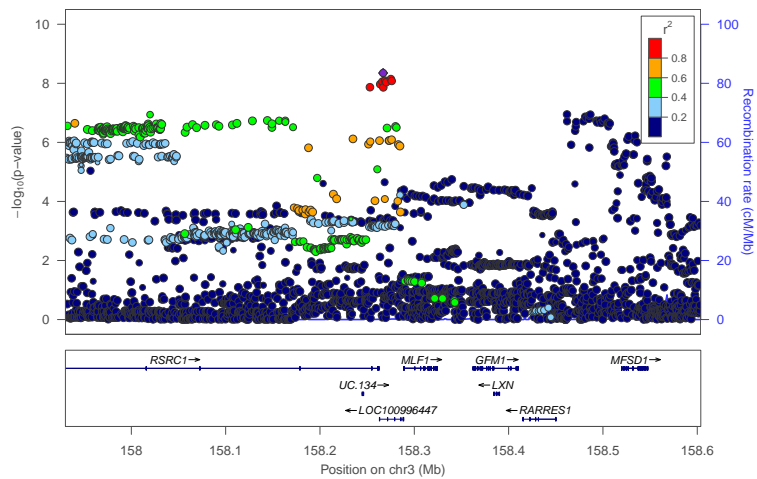

locus 128 rs111550352

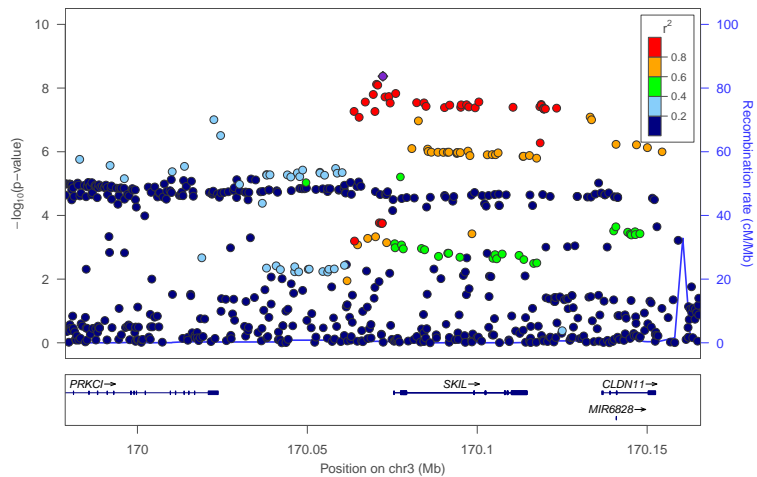

locus 129 rs10936661

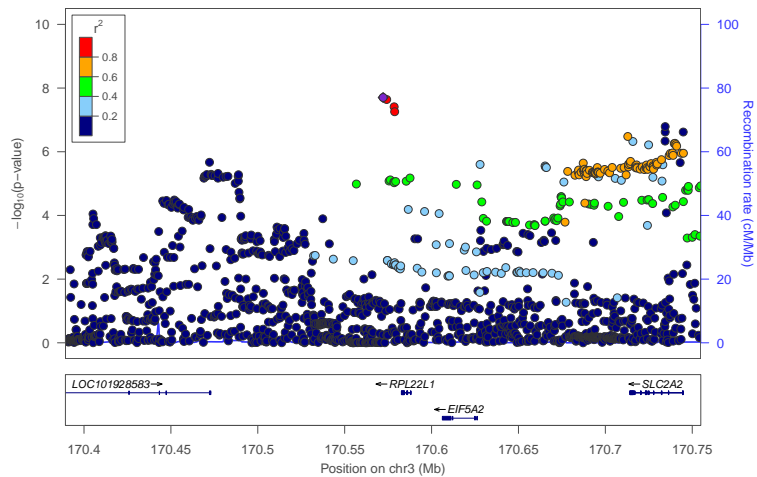



locus 130 rs694786

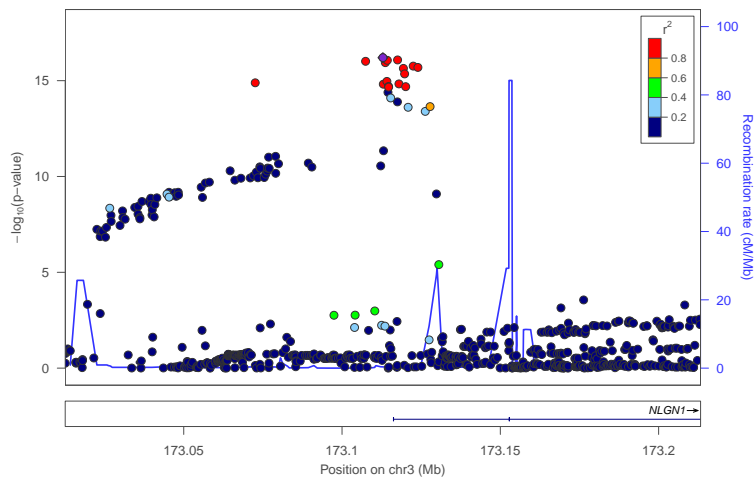

locus 131 rs60018000

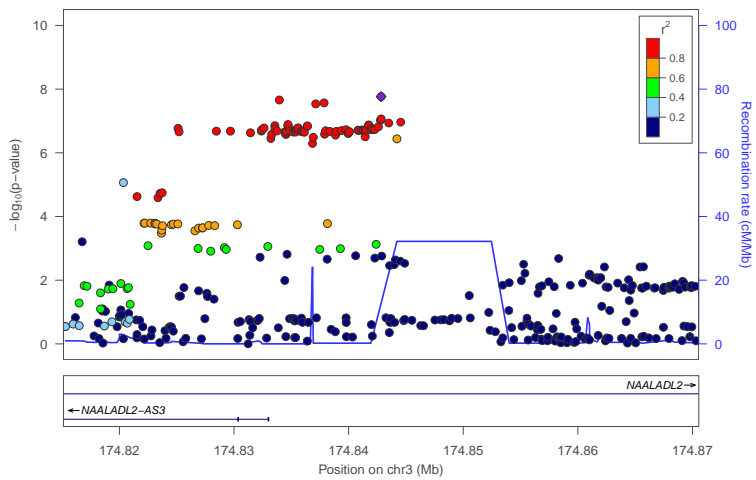

locus 132 rs4260410

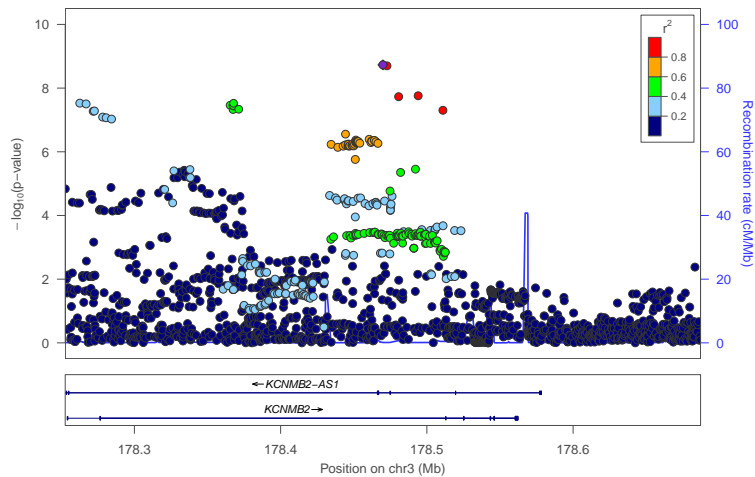

locus 133 rs2216427

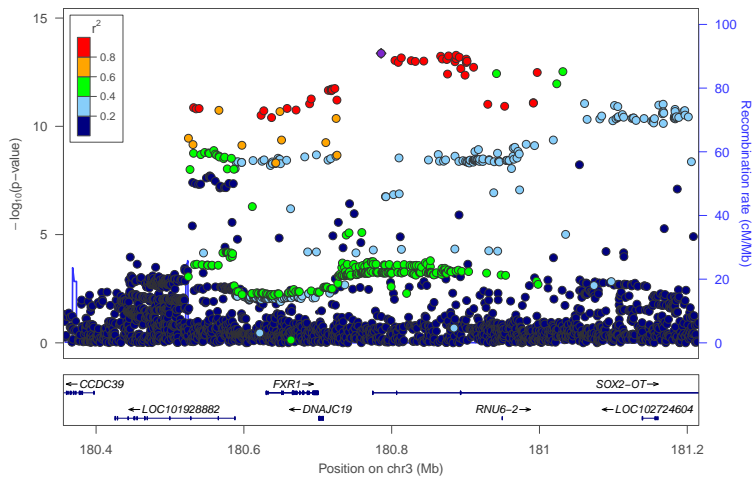

locus 134 rs6786798

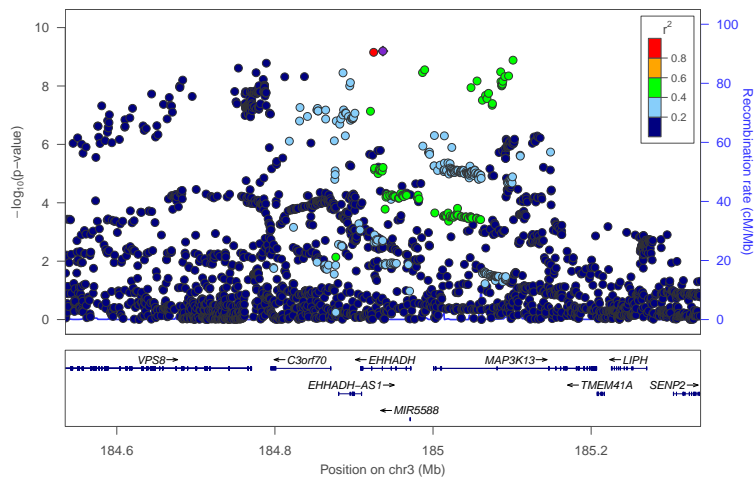

locus 135 rs745850919

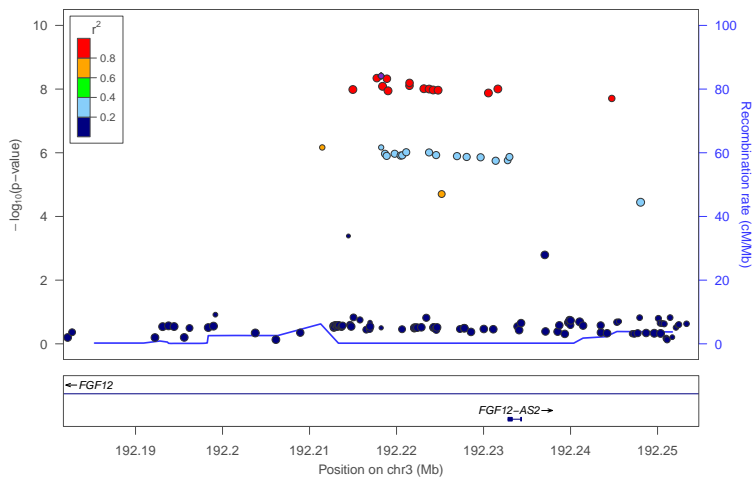

locus 136 rs12647020

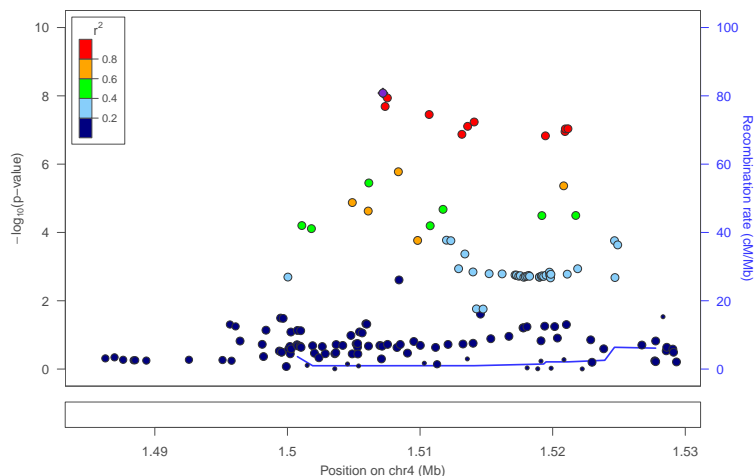

locus 137 rs6857447

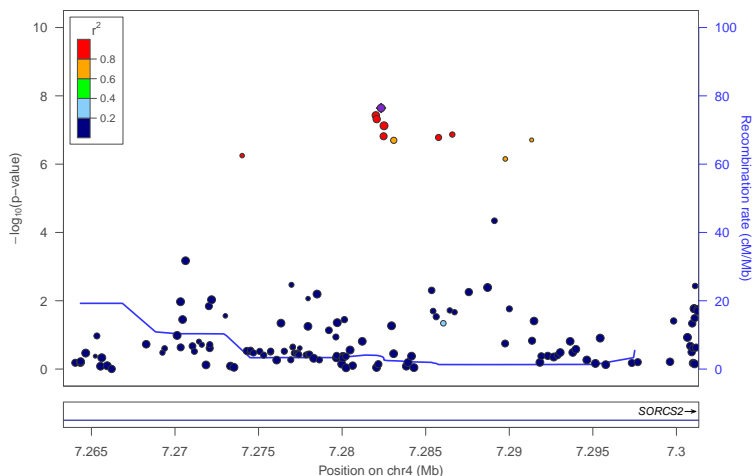

locus 138 rs2658509

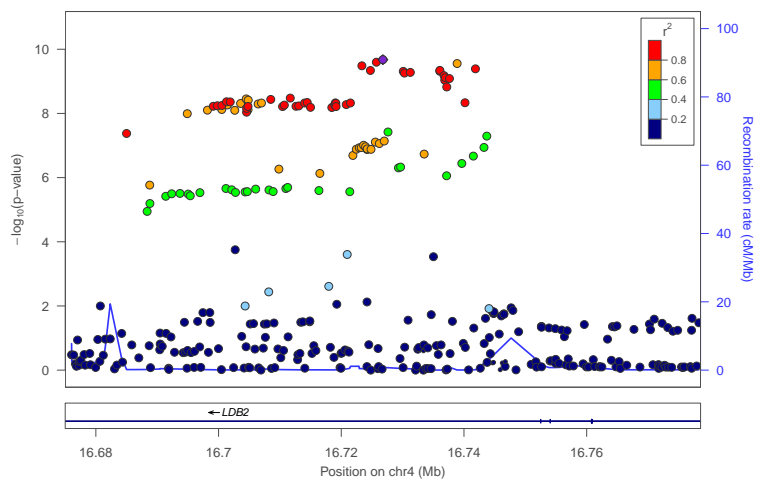

locus 139 rs113591949

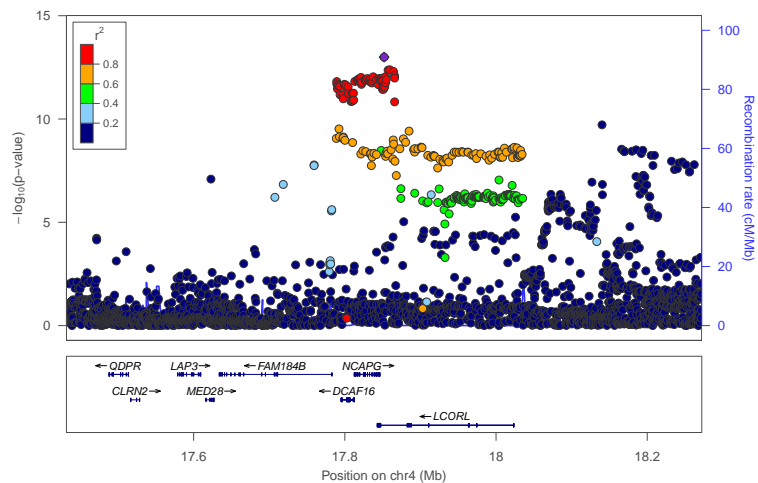

locus 140 rs34791171

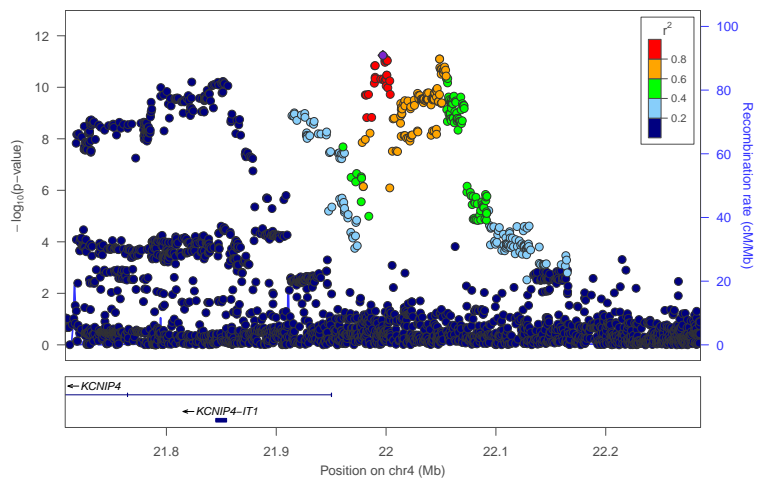

locus 141 rs2667298

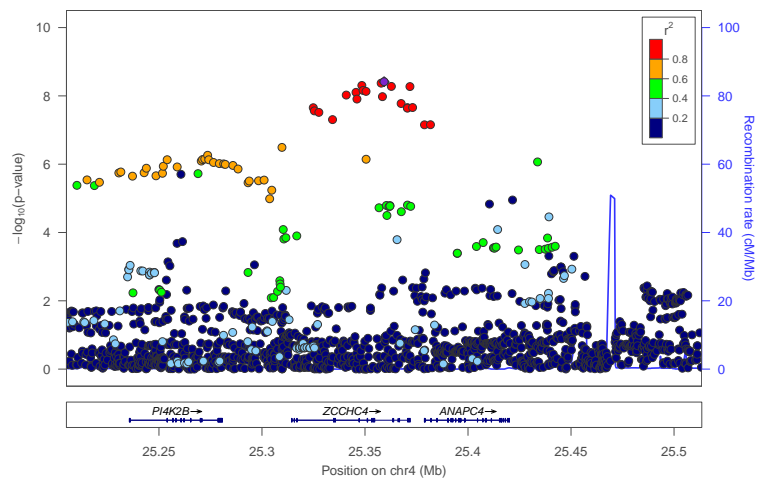

locus 142 rs190495

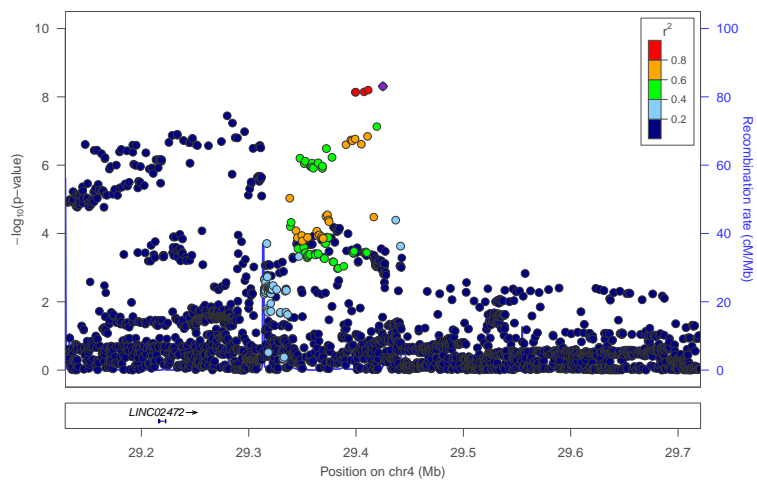

locus 143 rs10026643

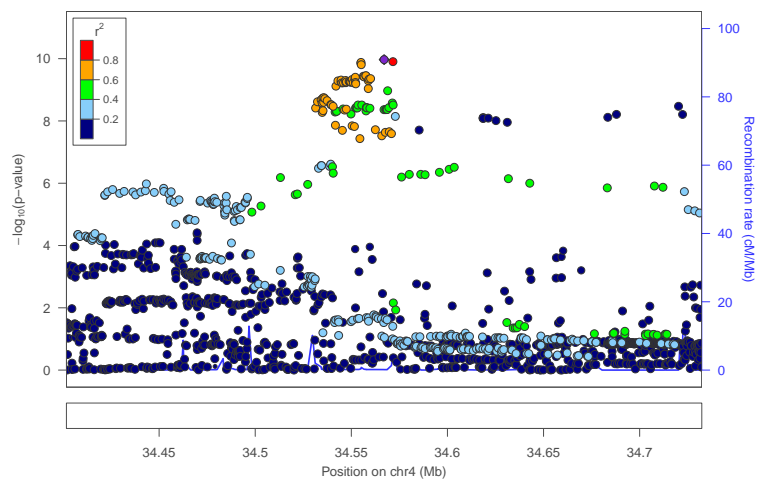

locus 144 rs2581458

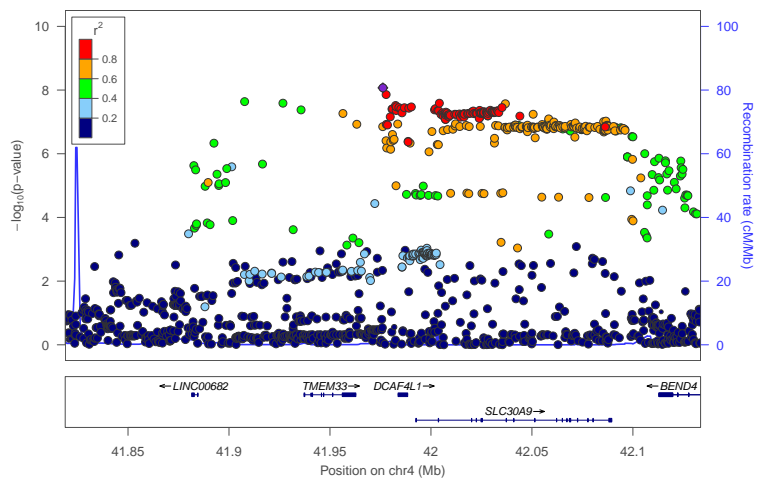

locus 145 rs10517119

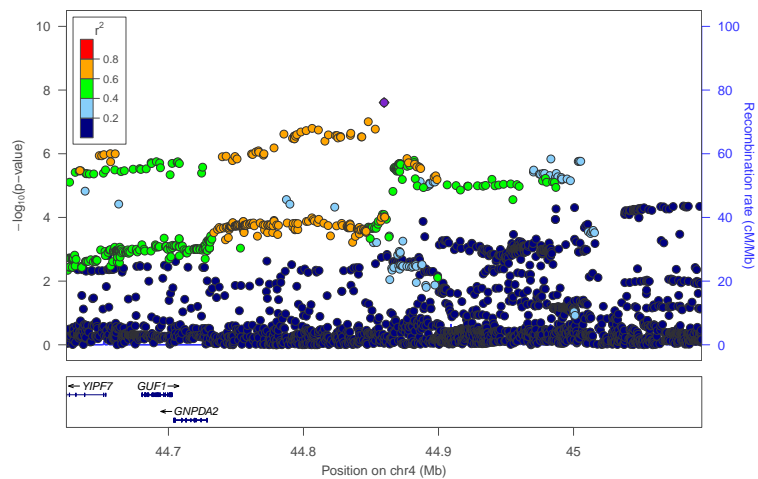

locus 146 rs4860090

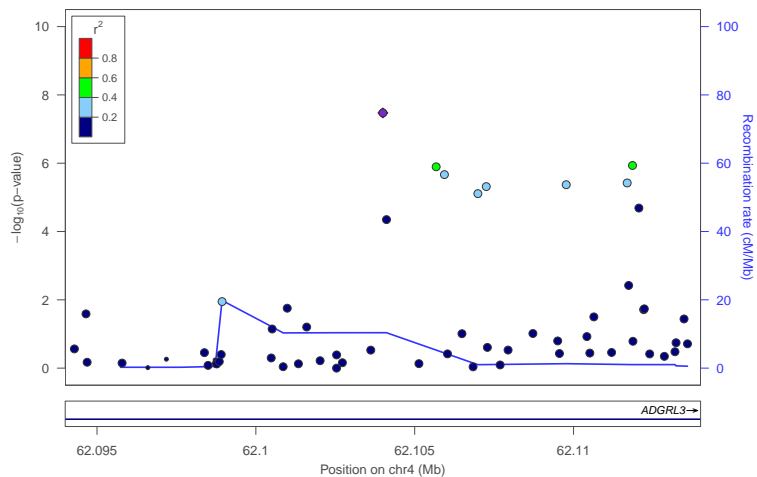

locus 147 rs6812227

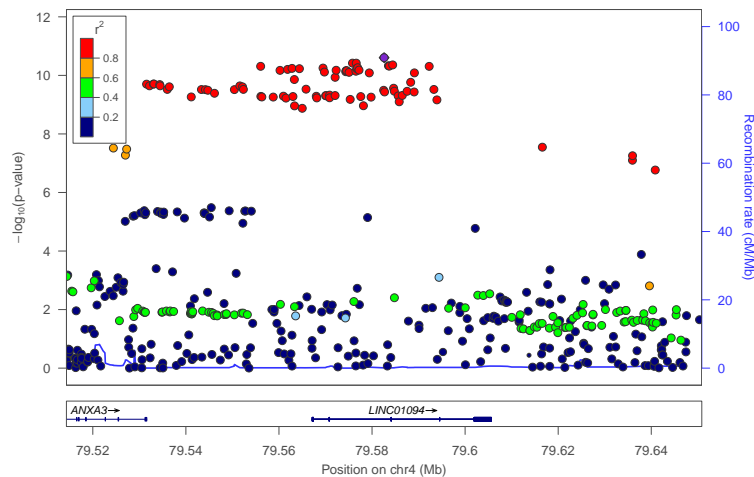

locus 148 rs1132460

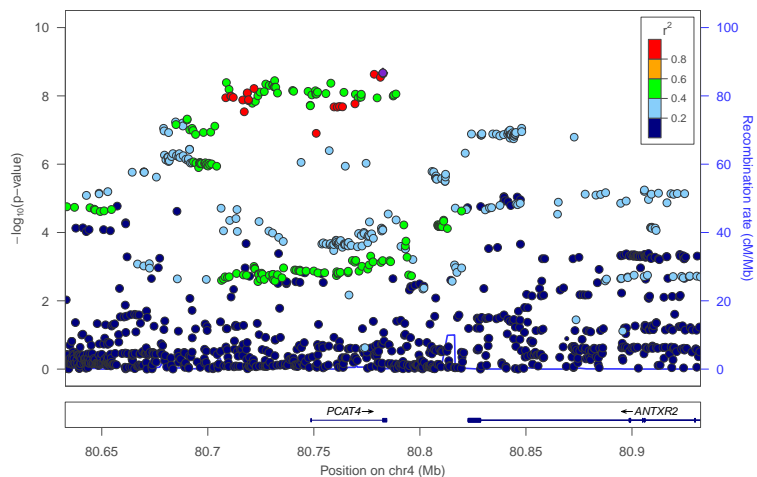

locus 149 rs2011962

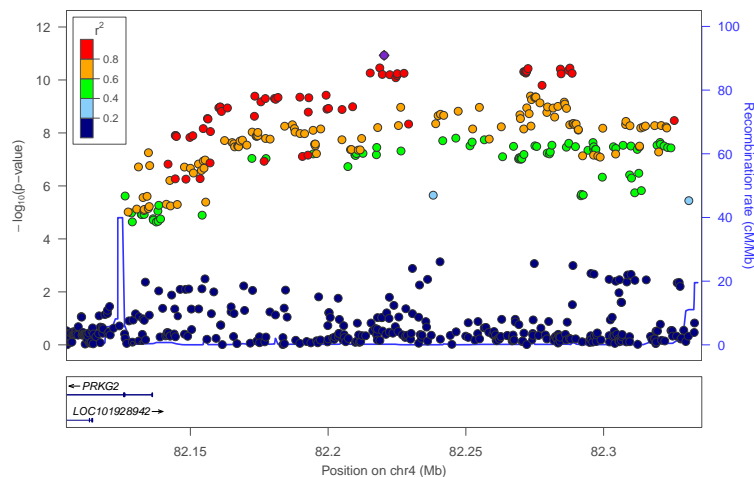

locus 150 rs356179

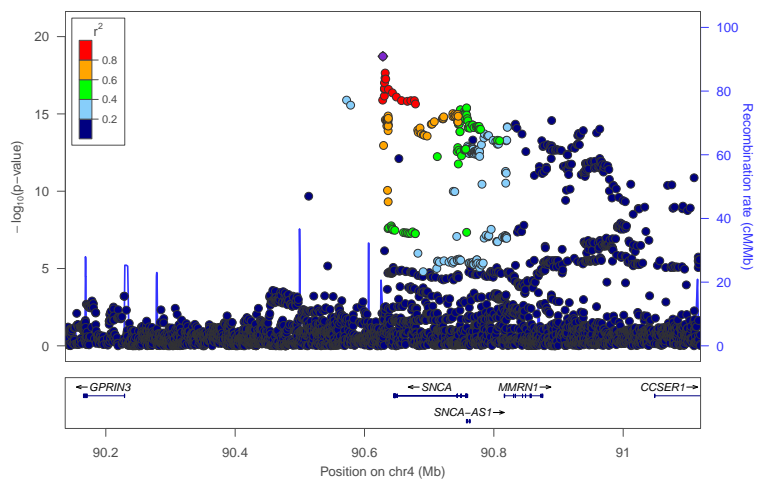

locus 151 rs11730384

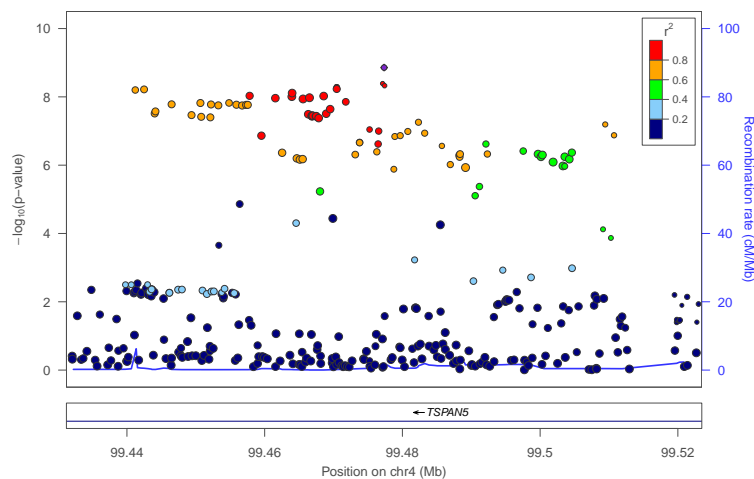

locus 152 rs11940529

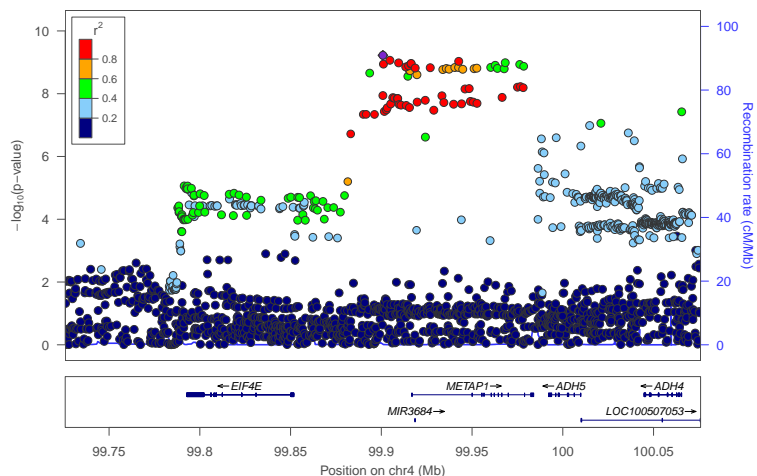

locus 153 rs62307308

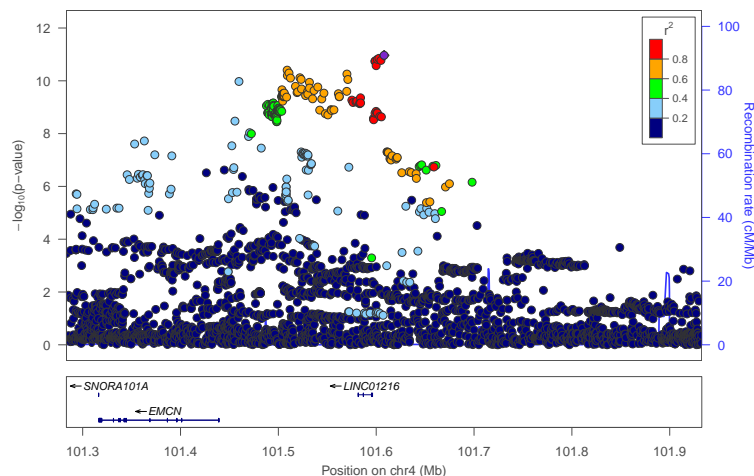

locus 154 rs13107325

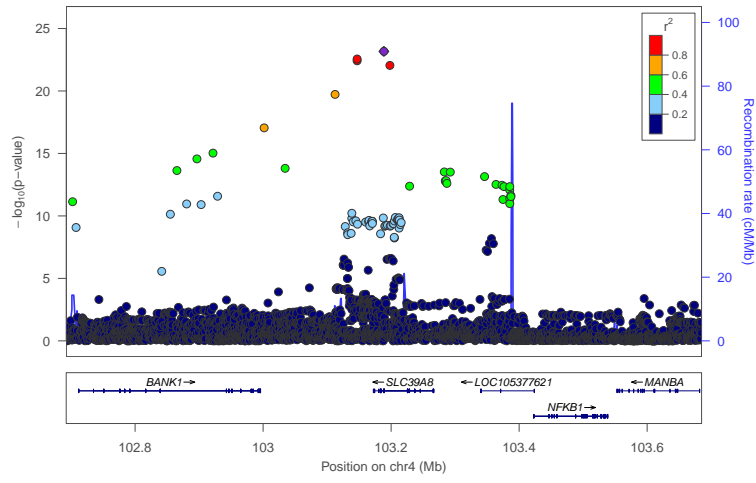

locus 155 rs2903385

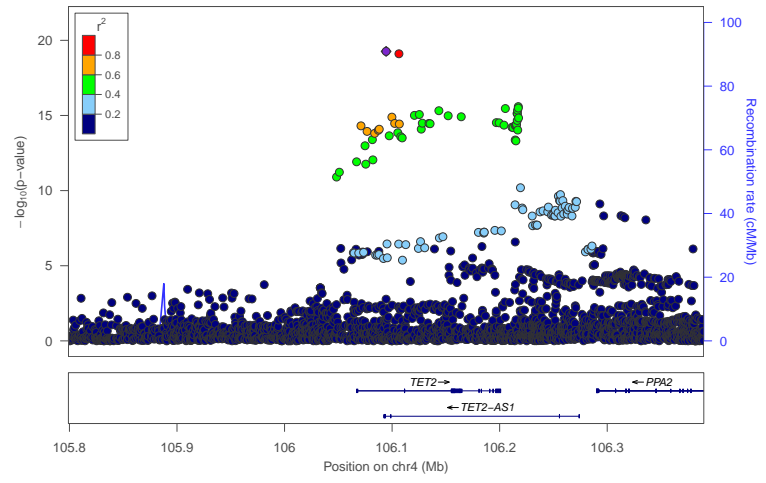

locus 156 rs13108200

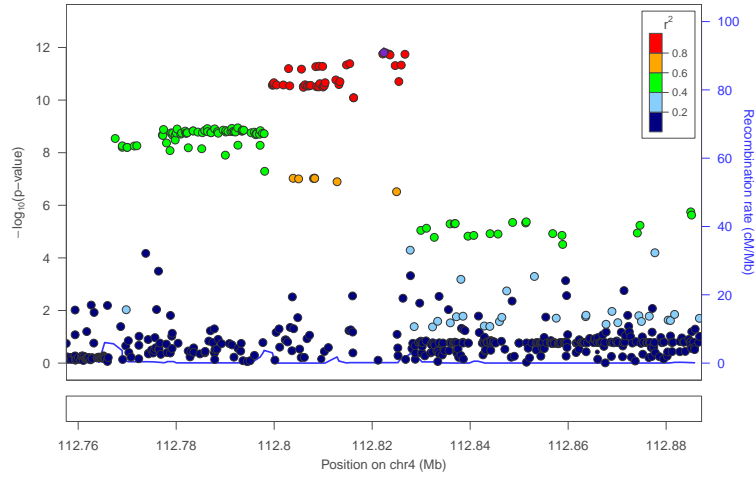

locus 157 rs6533604

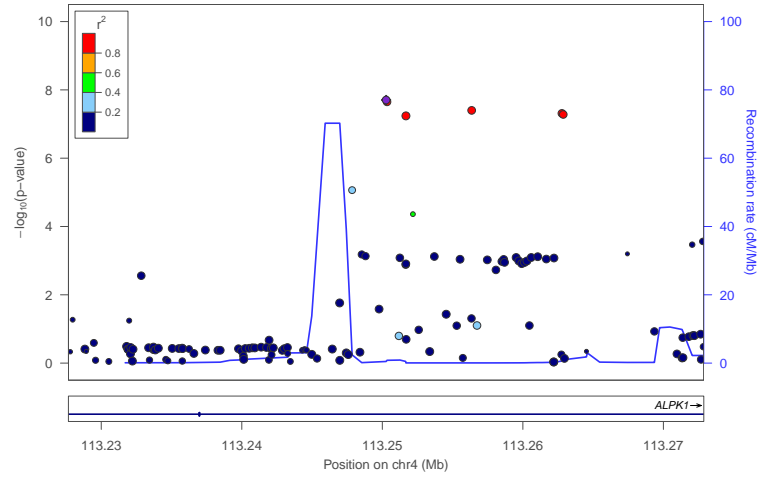

locus 158 rs45510091

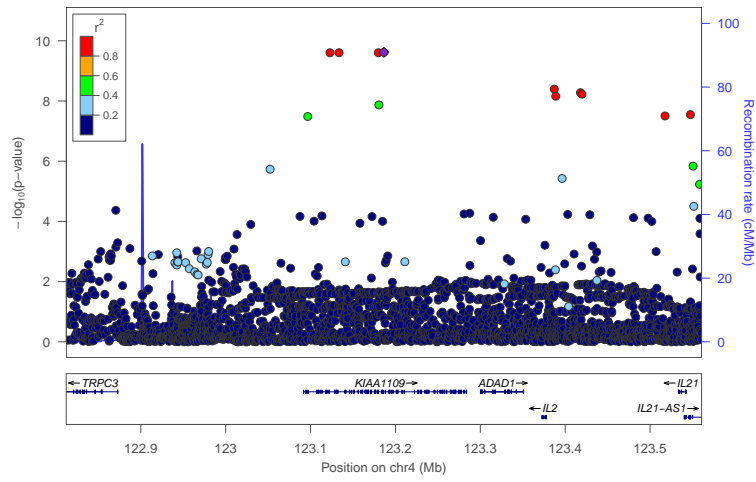

locus 159 rs7657954

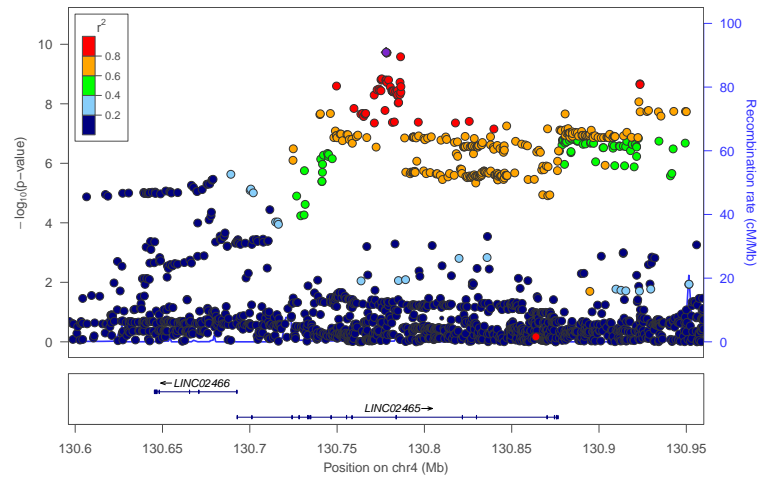

locus 160 rs3733421

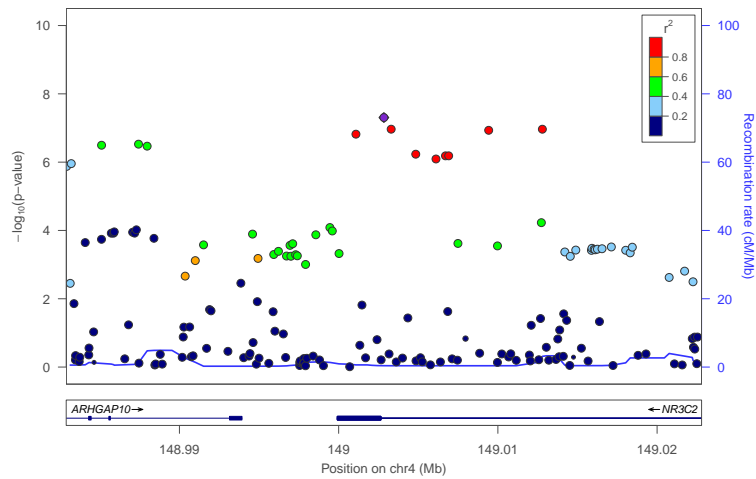

locus 161 rs1820514

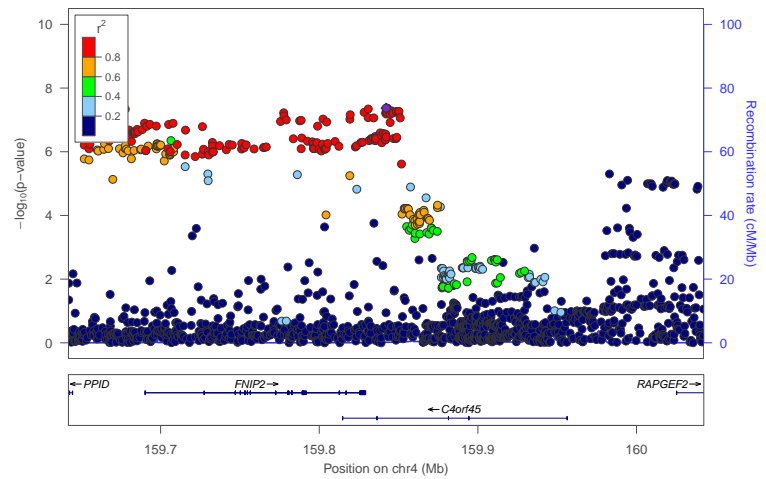



locus 162 rs11729015

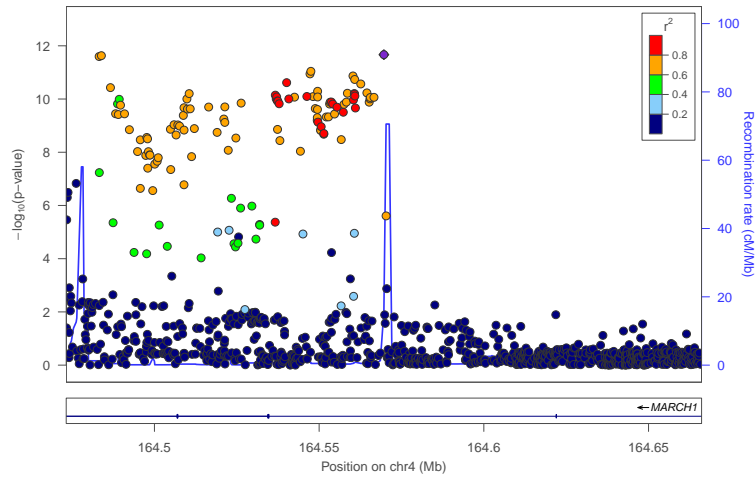

locus 163 rs11724690

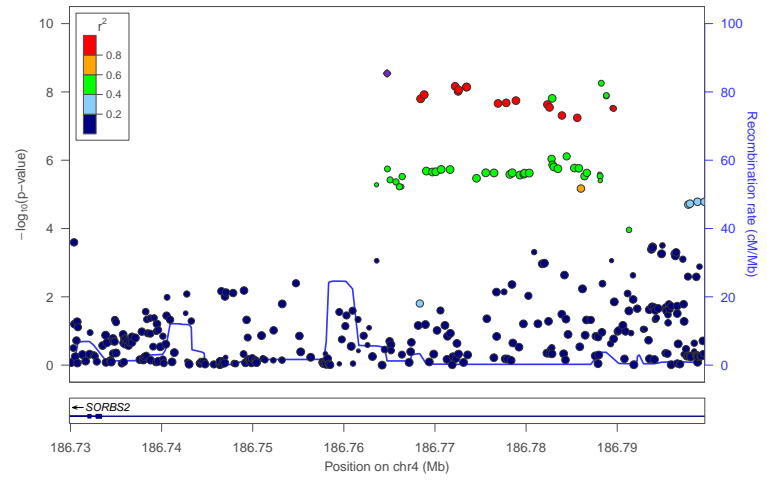

locus 164 rs14772881

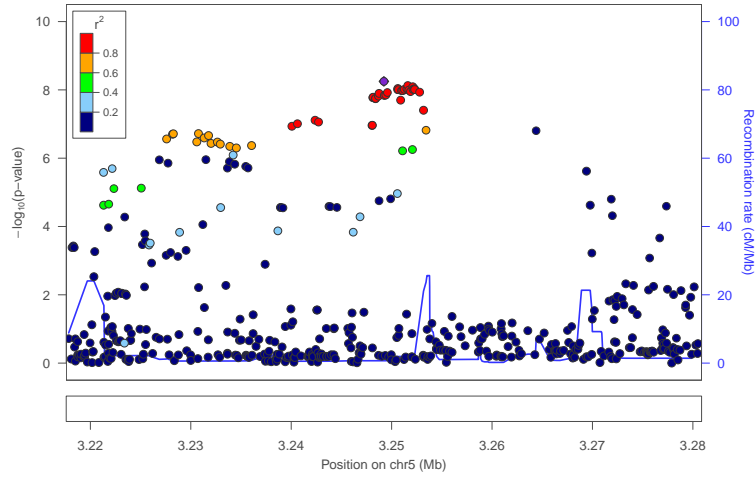

locus 165 rs4454035

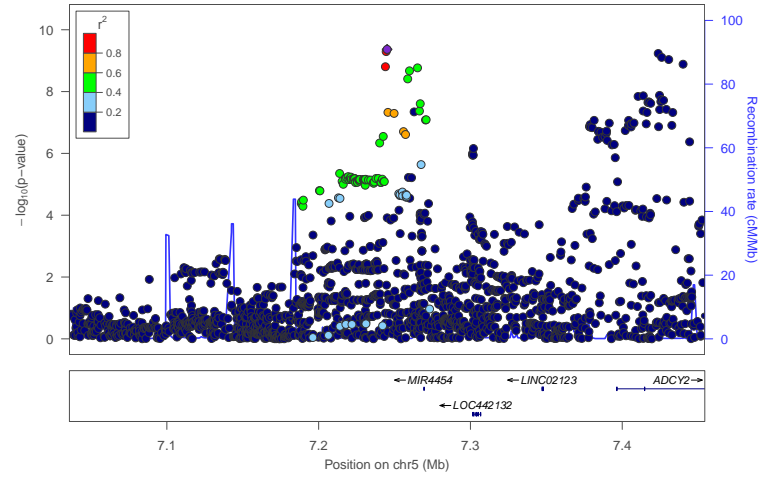

locus 166 rs6872919

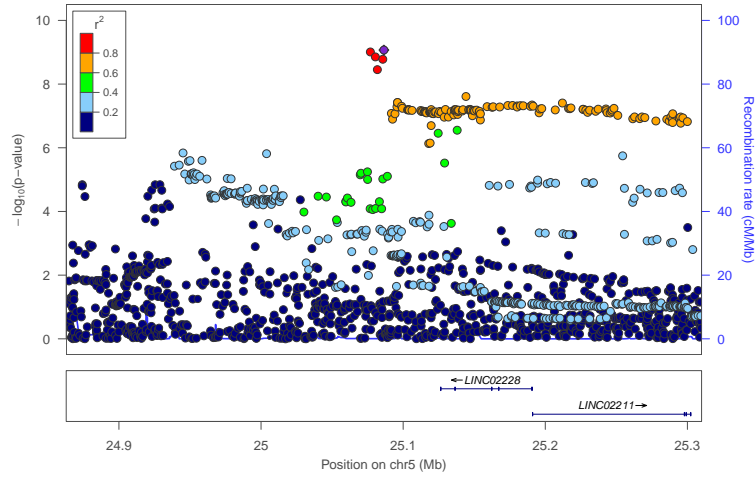

locus 167 rs34971686

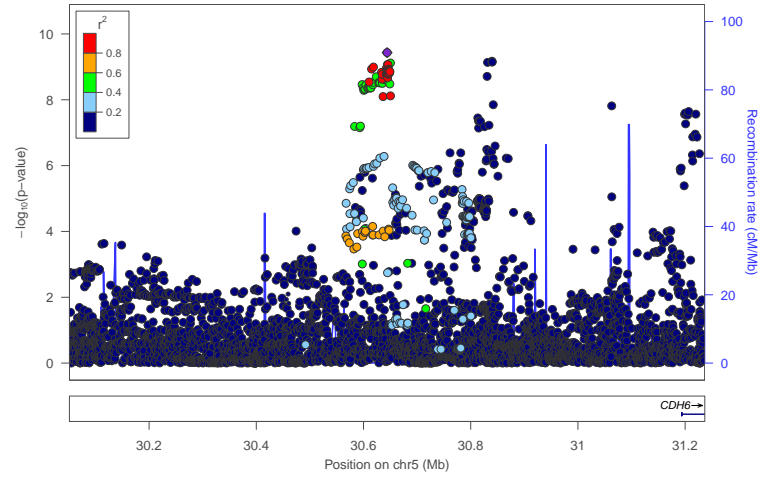

locus 168 rs77176363

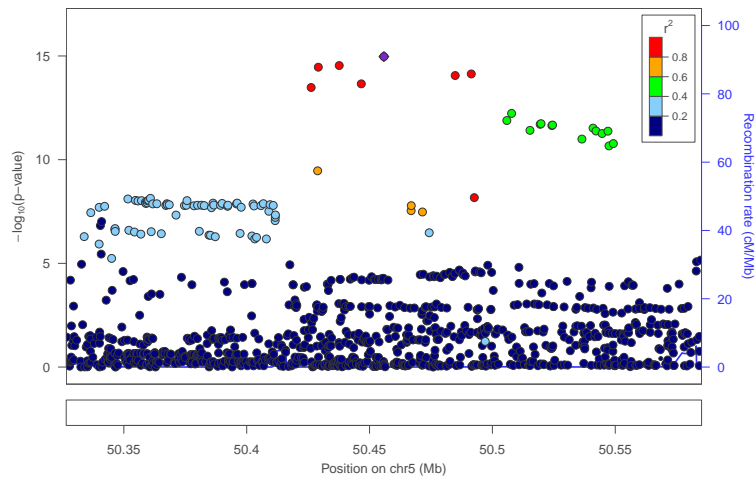

locus 169 rs6449590

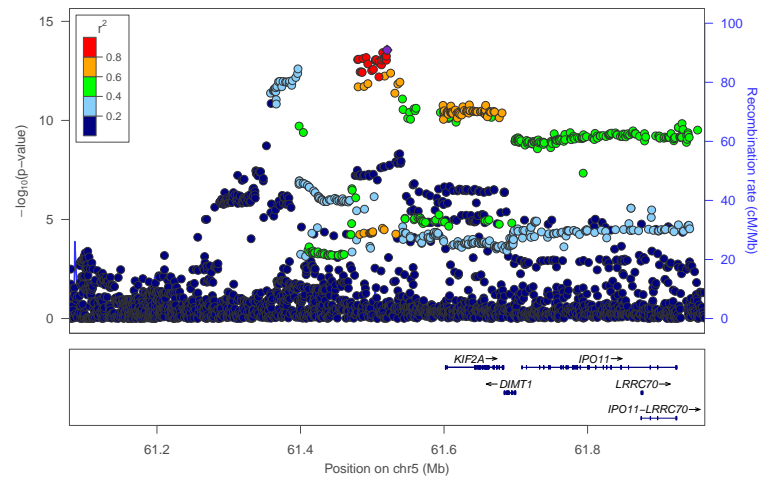

locus 170 rs669245

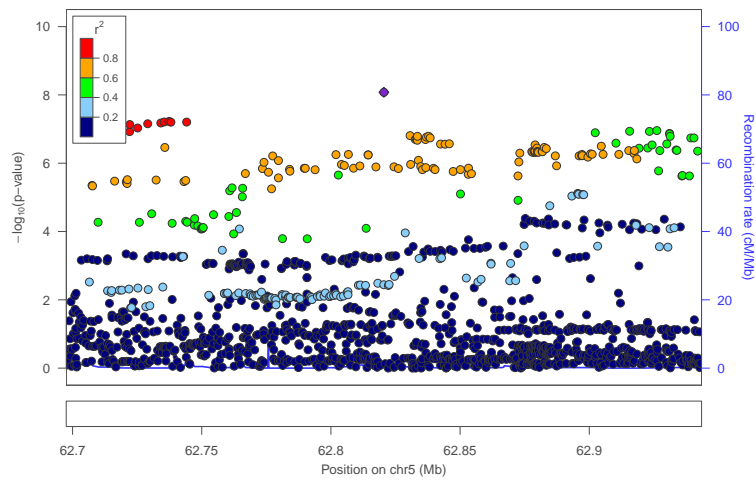

locus 171 rs6864168

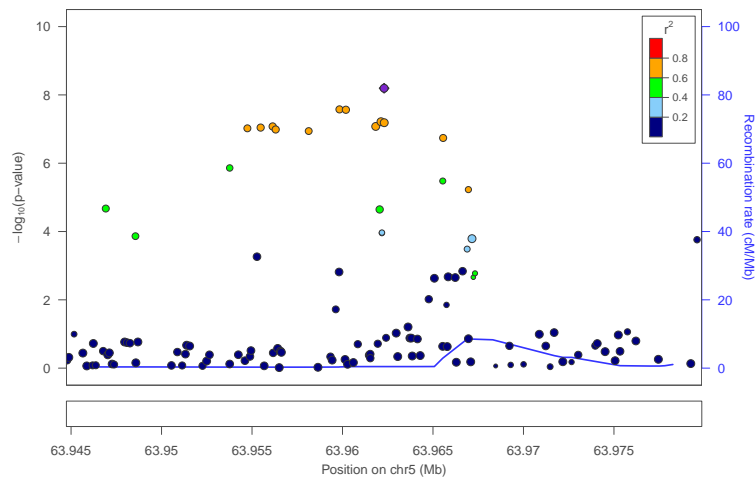

locus 172 rs62363245

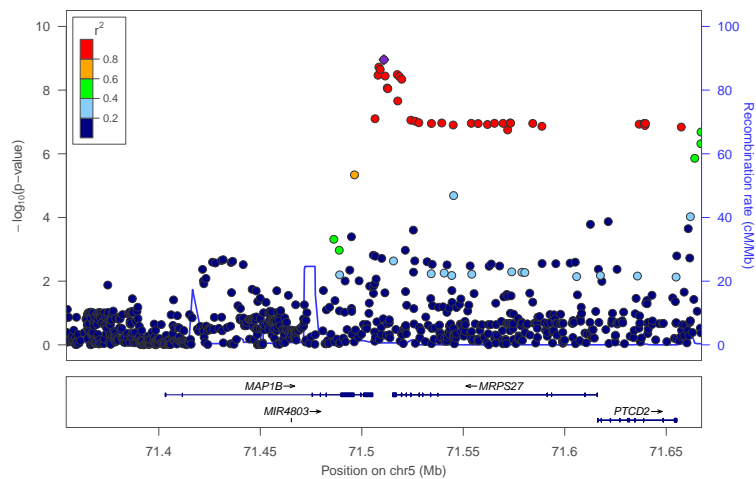

locus 173 rs11949379

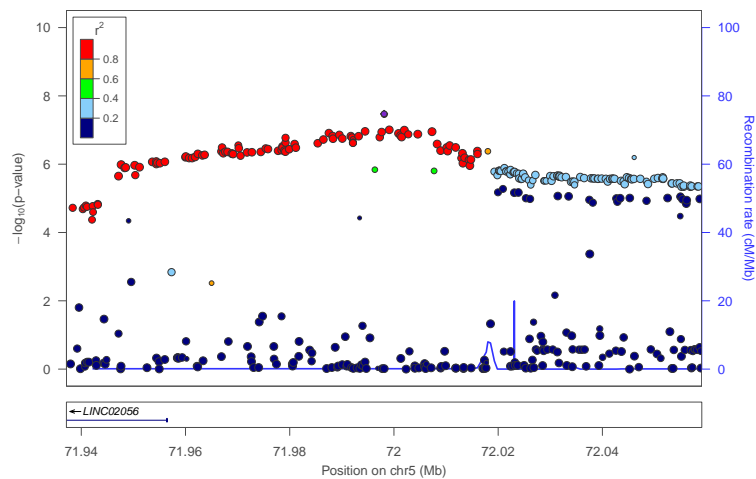

locus 174 rs7708900

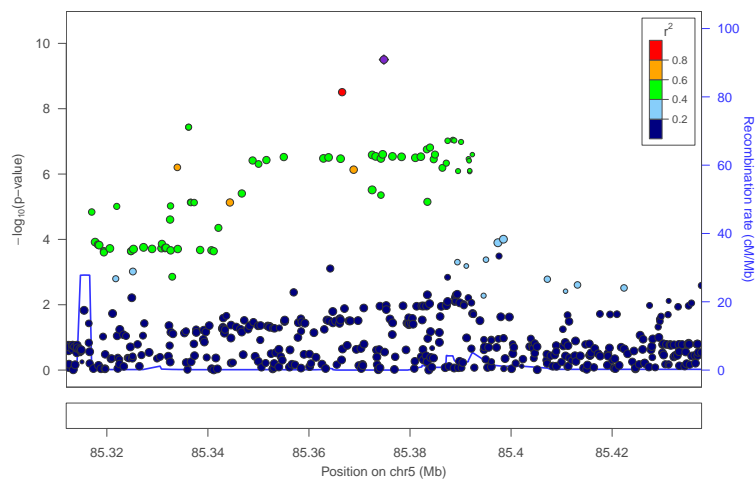

locus 175 rs34164261

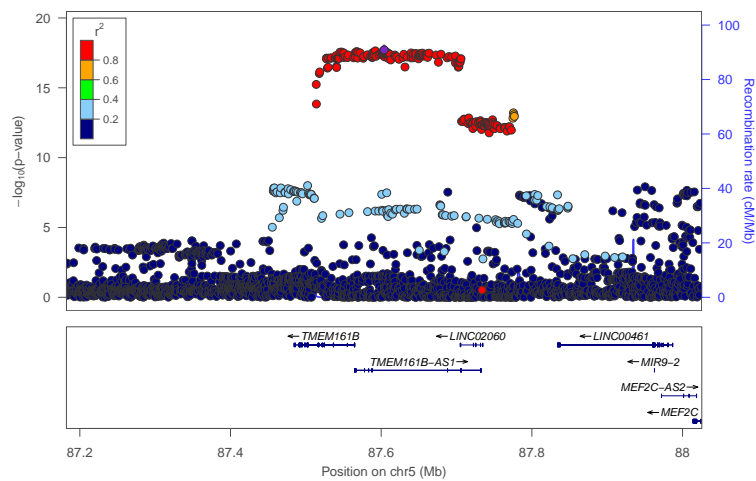

locus 176 rs4492142

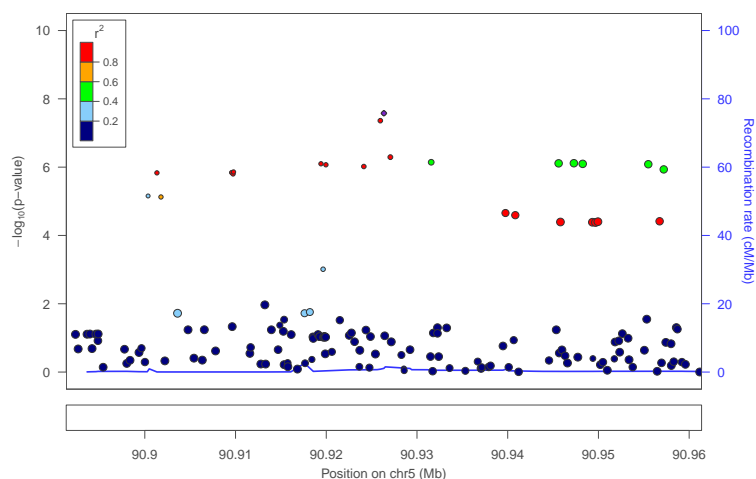

locus 177 rs34315689

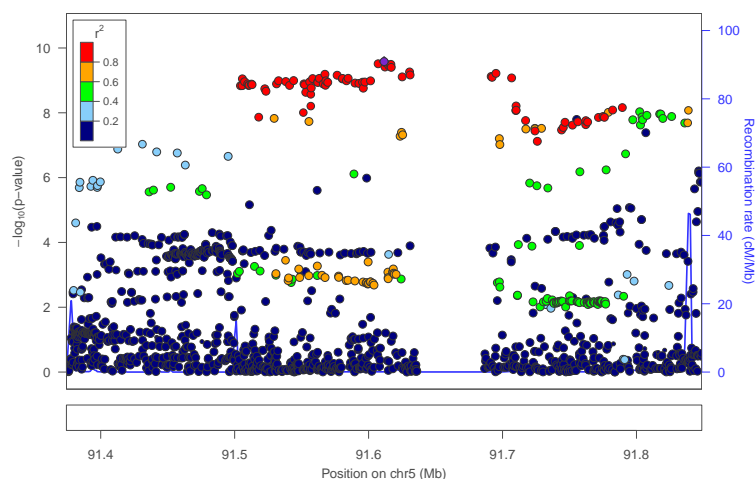

locus 178 rs11135493

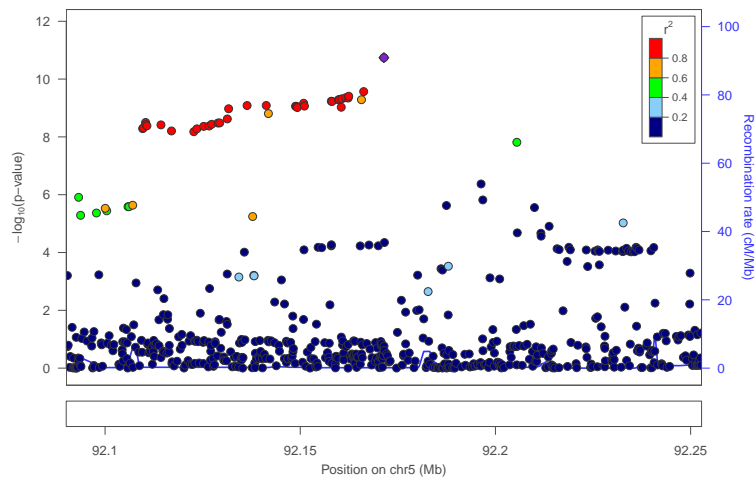

locus 179 rs10066873

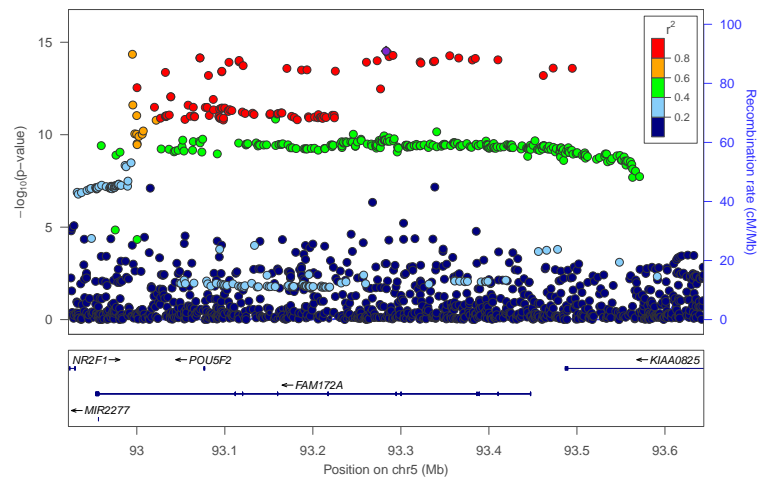

locus 180 rs2569013

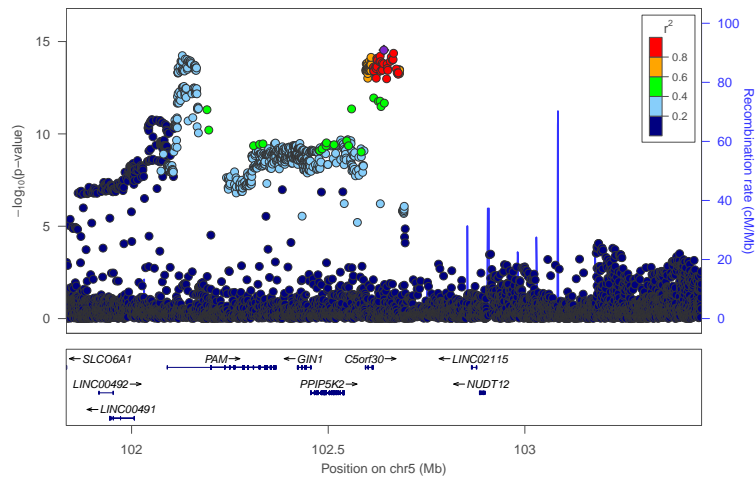

locus 181 rs2431108

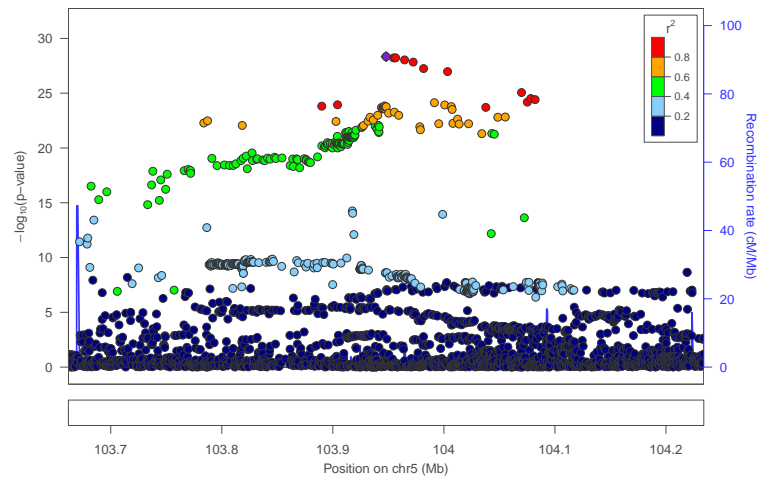

locus 182 rs71575448

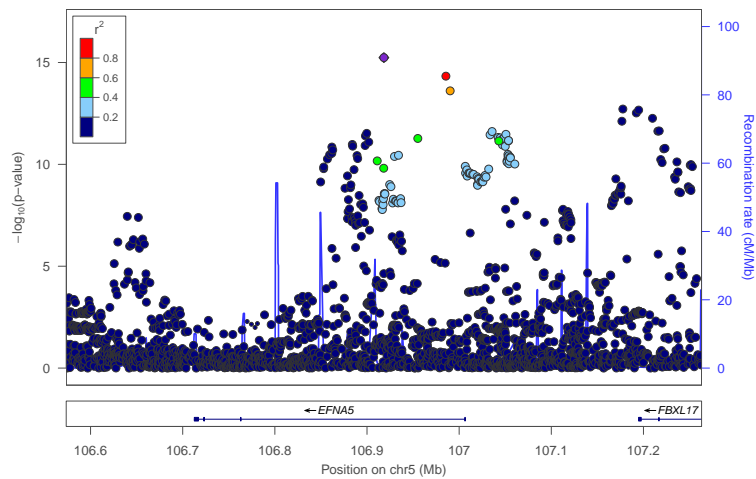

locus 183 rs872621

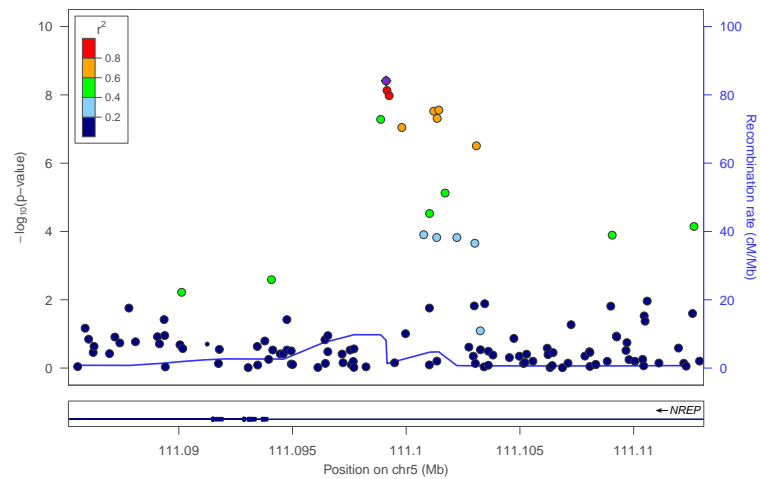

locus 184 rs62372418

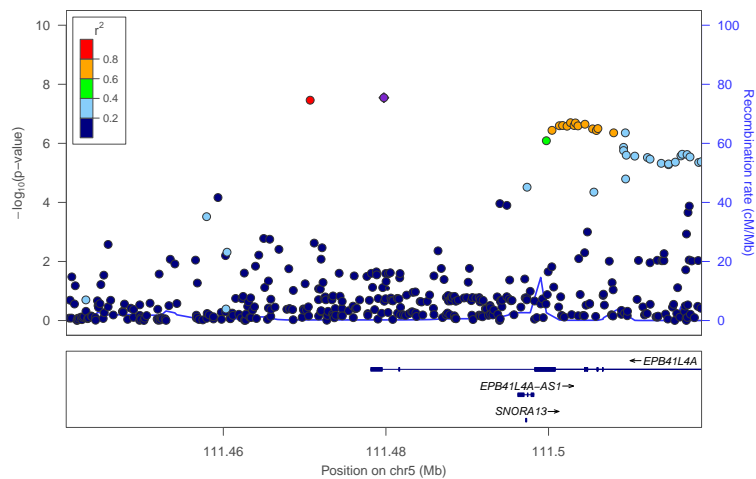

locus 185 rs11954162

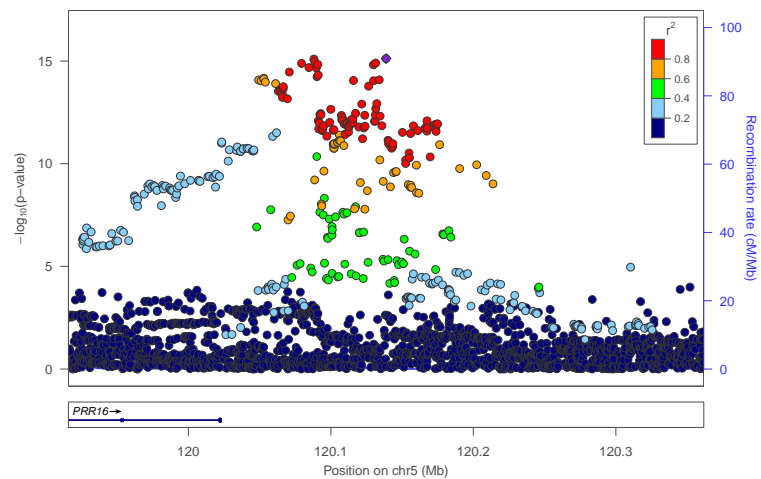

locus 186 rs7733986

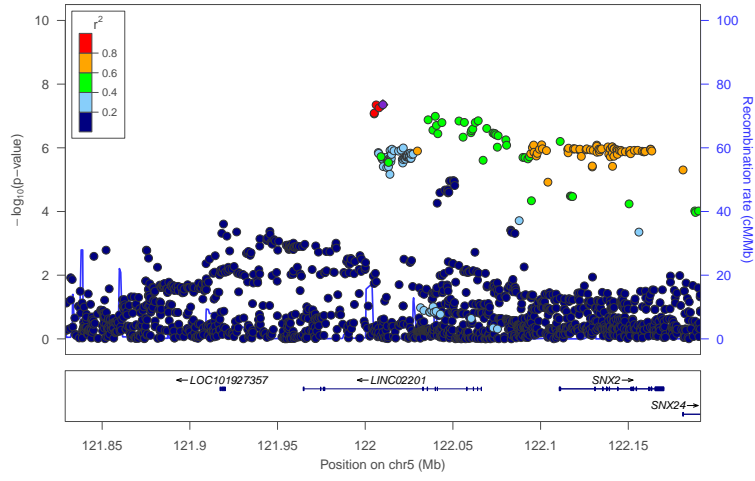

locus 187 rs35681248

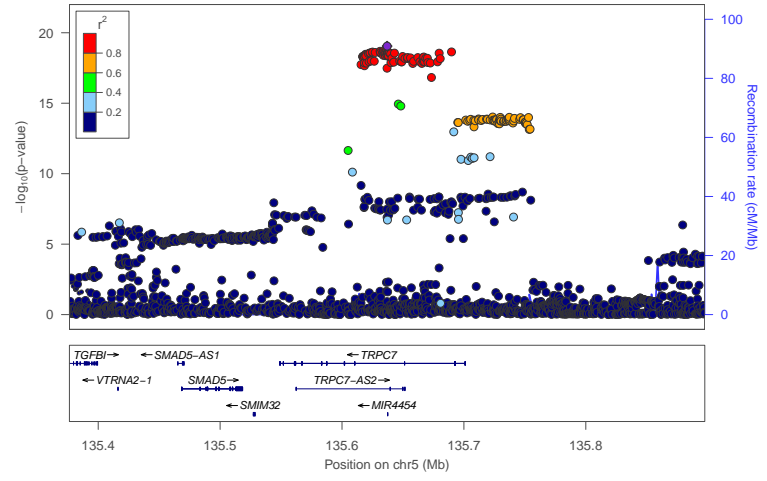

locus 188 rs10043722

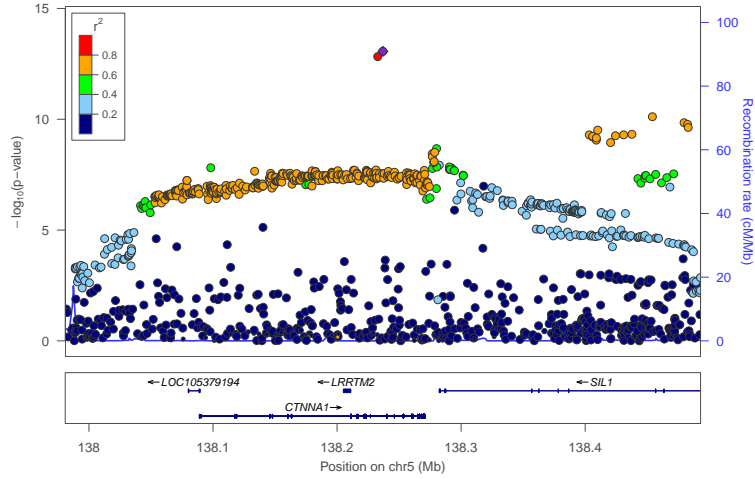

locus 189 rs251369

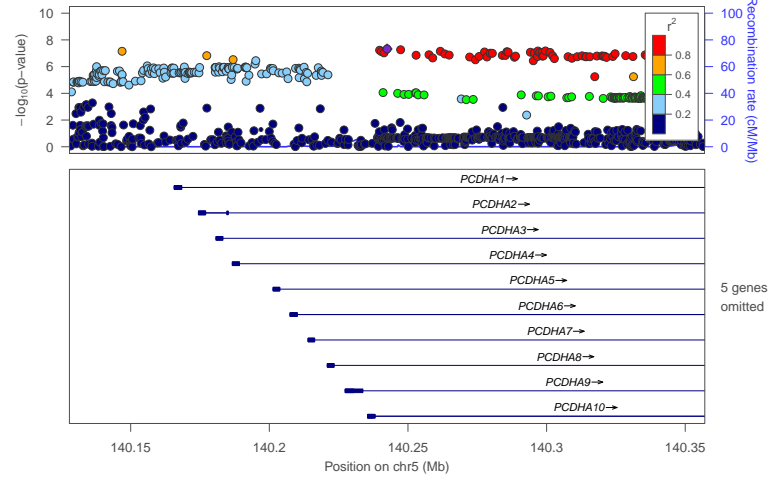

locus 190 rs6888135

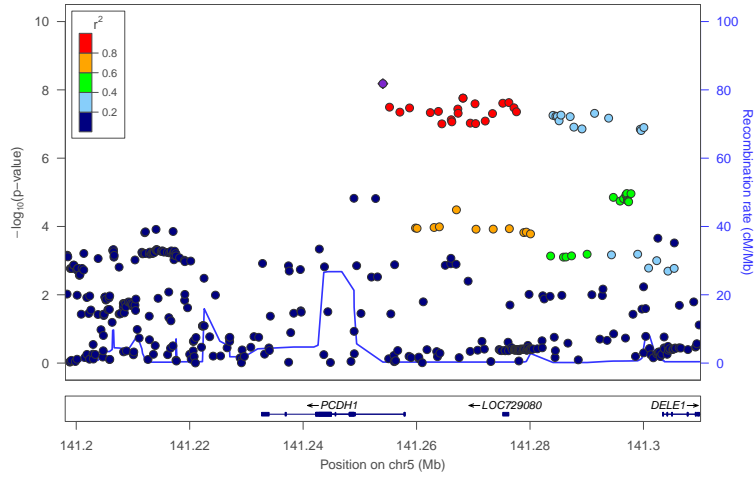

locus 191 rs4912844

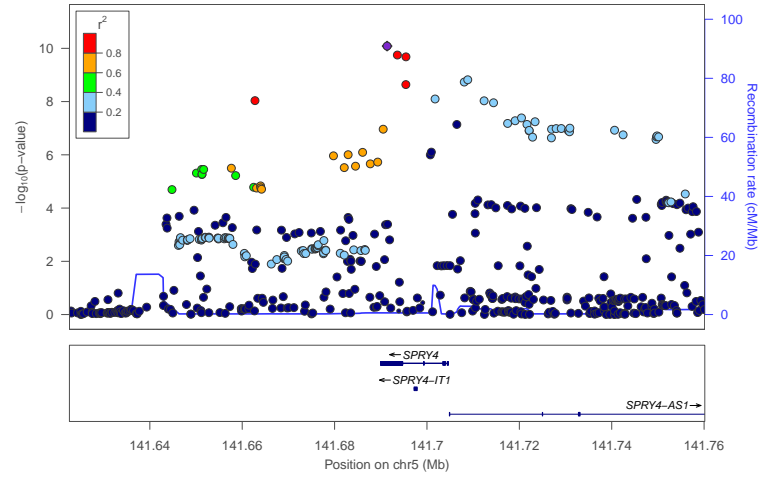

locus 192 rs463245

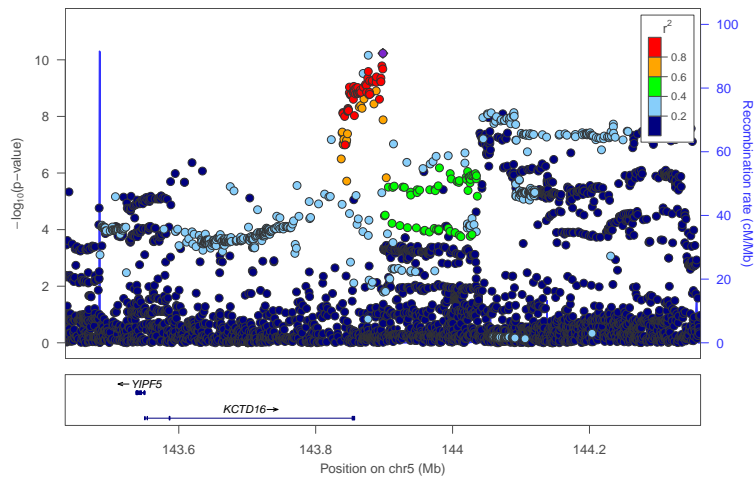

locus 193 rs6580564

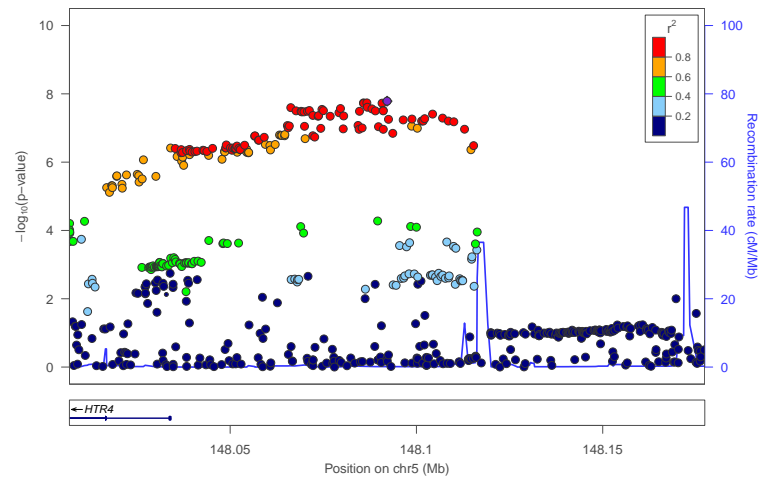



locus 194 rs10045427

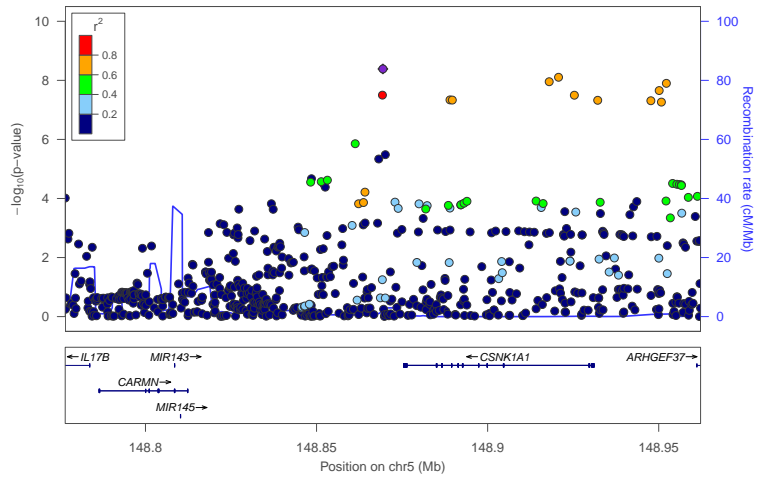

locus 195 rs10035289

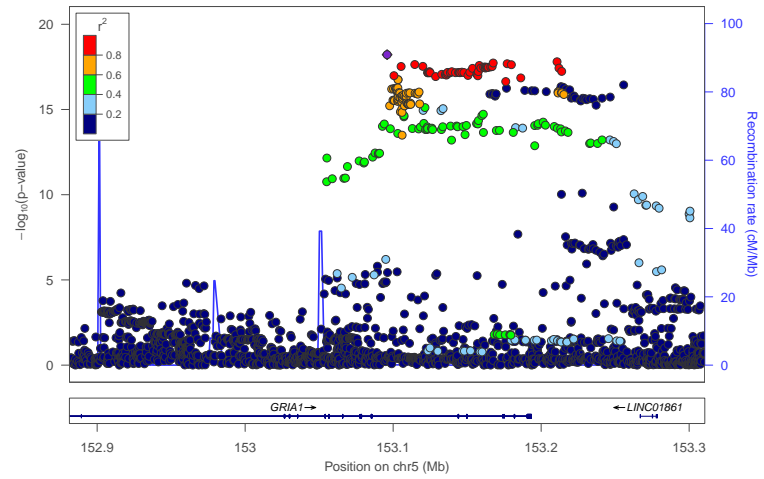

locus 196 rs11956866

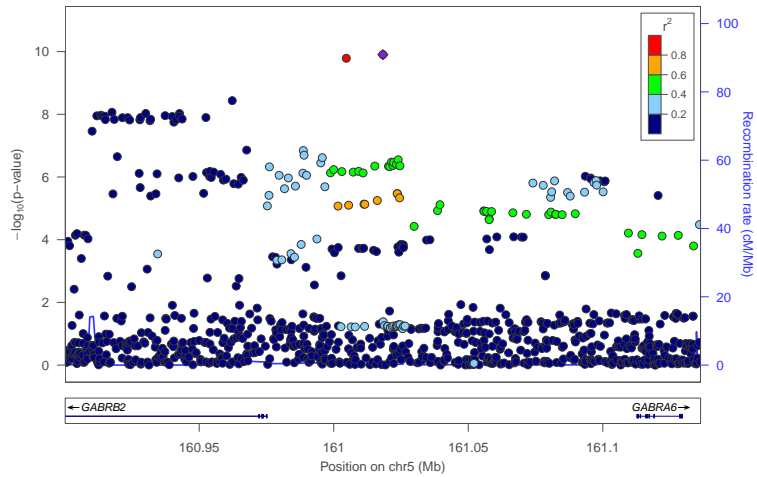

locus 197 rs62383290

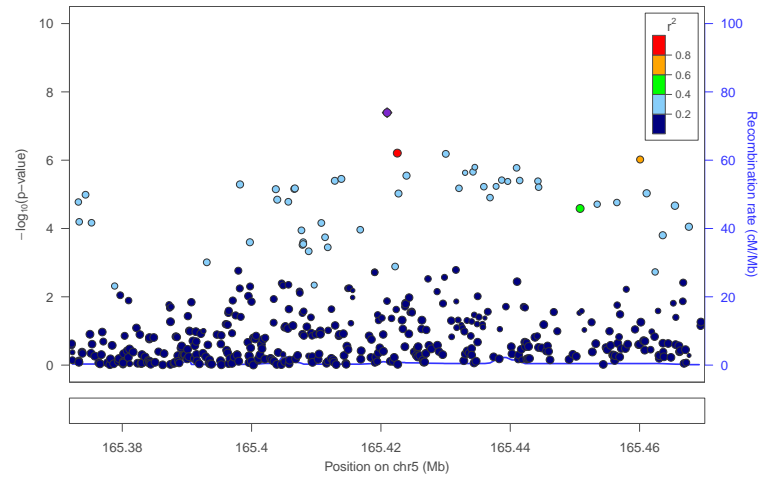

locus 198 rs9313374

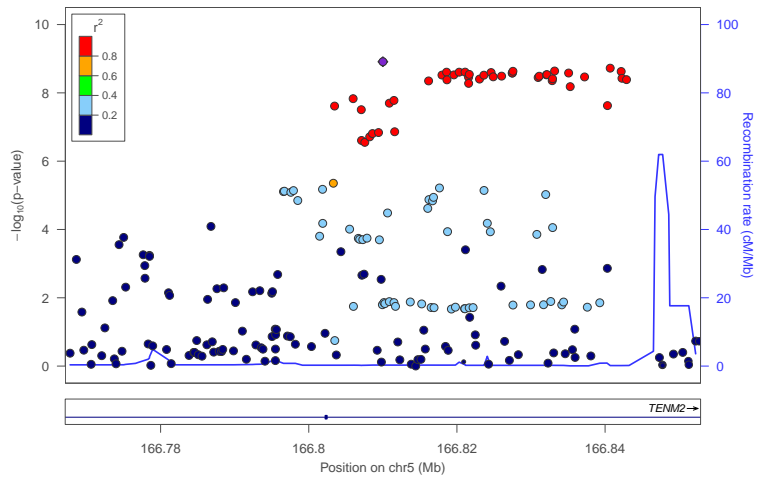

locus 199 rs879483

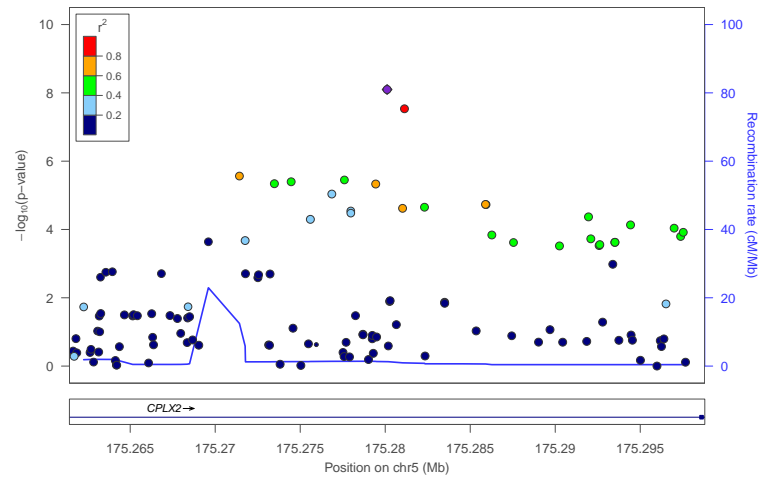

locus 200 rs6878050

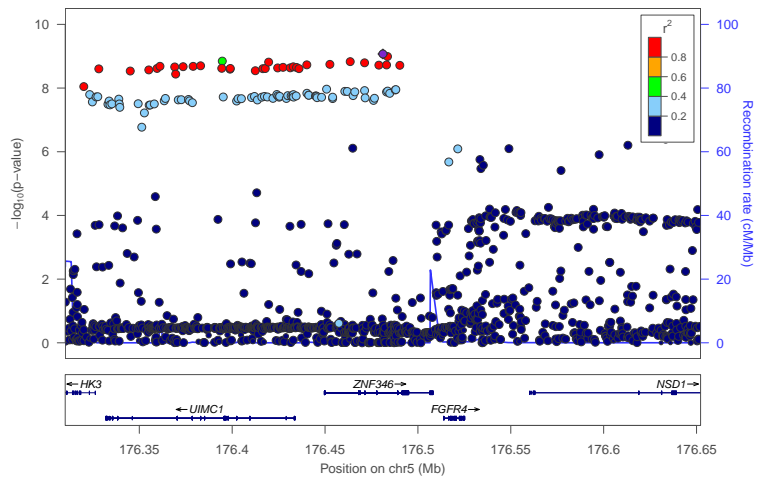

locus 201 rs4290977

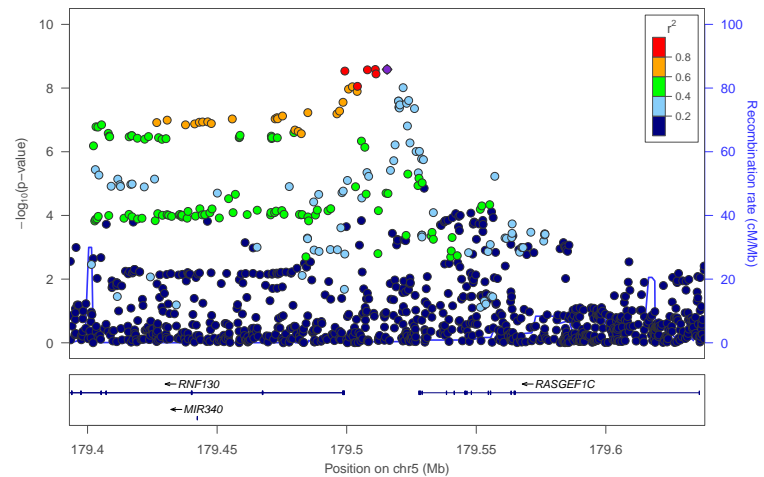

locus 202 rs377472105

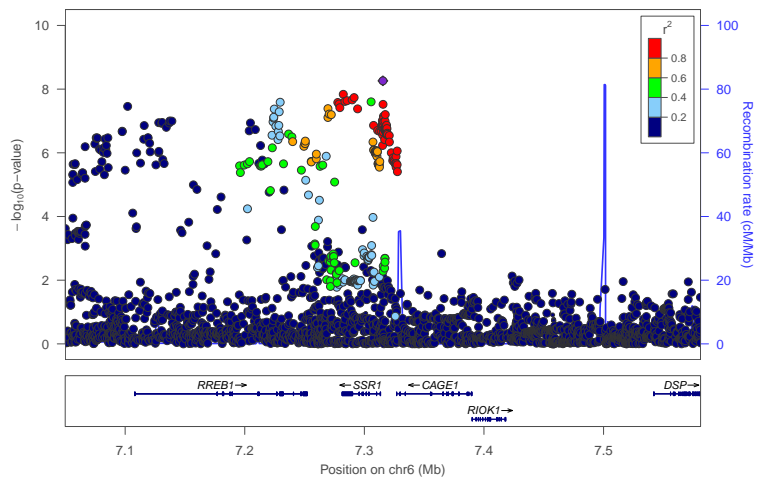

locus 203 rs35056688

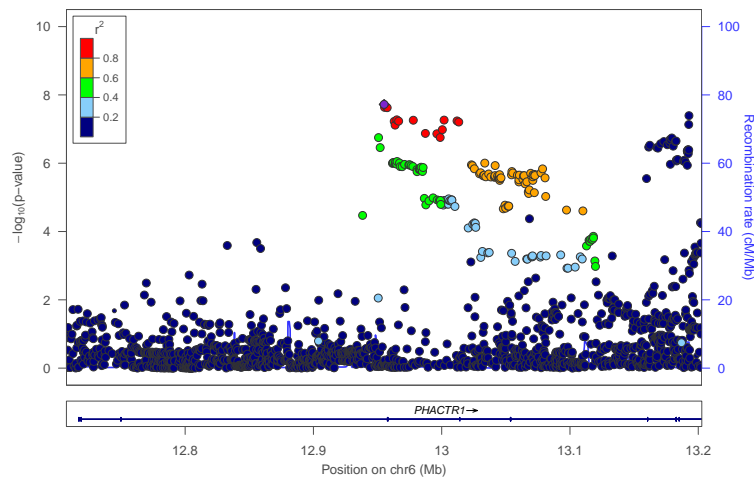

locus 204 rs427597

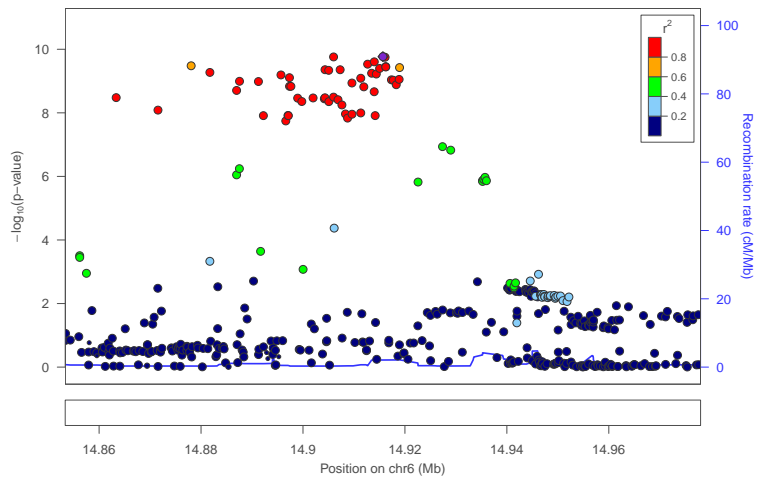

locus 205 rs1397844

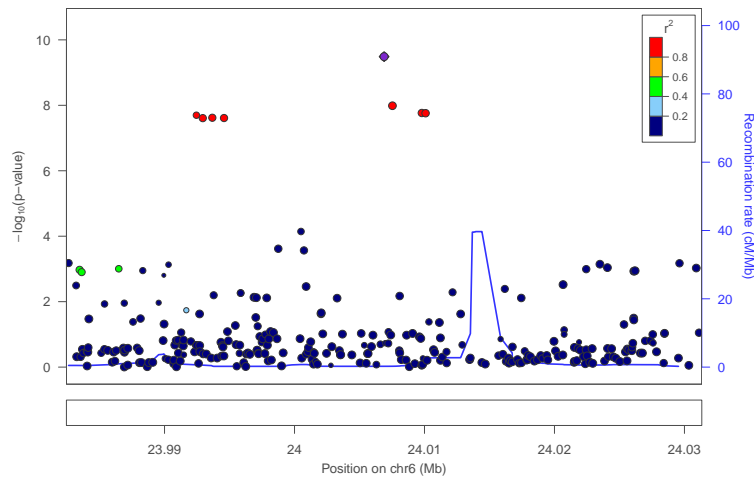

locus 206 rs2066295

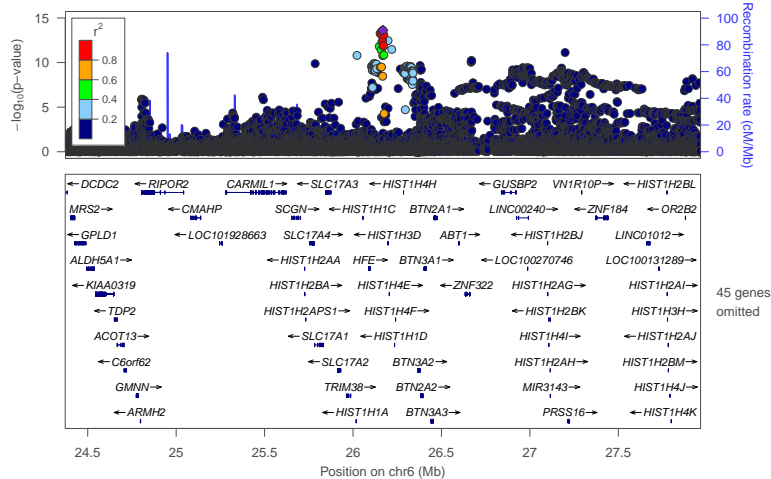

locus 207 rs55777621

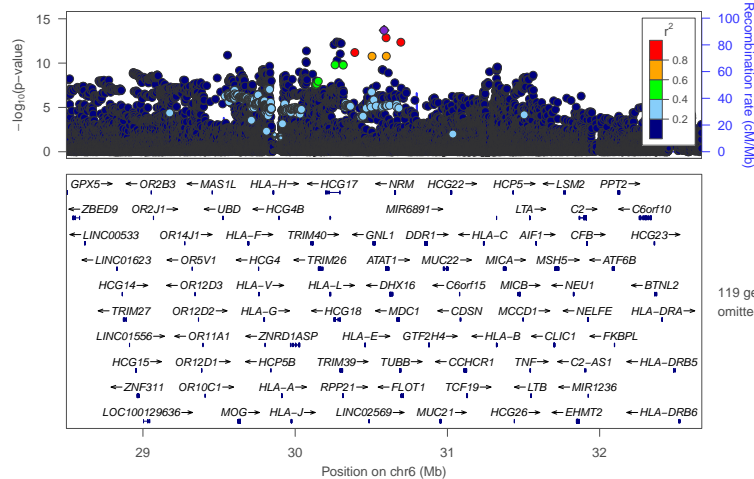

locus 208 rs2523578

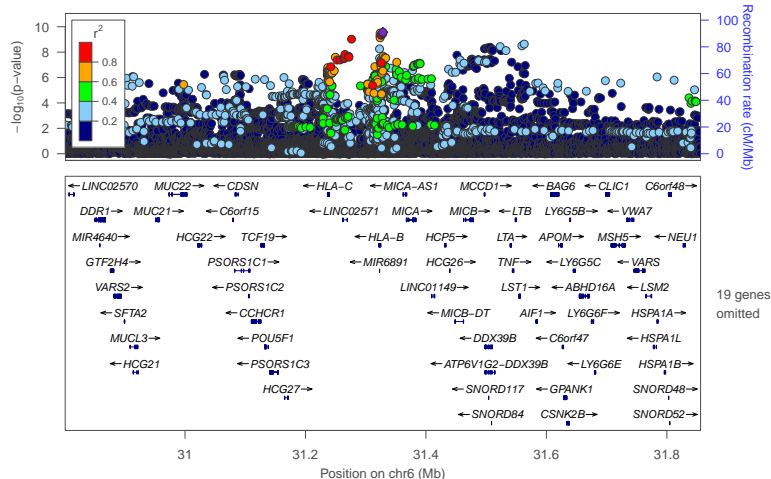

locus 209 rs9271763

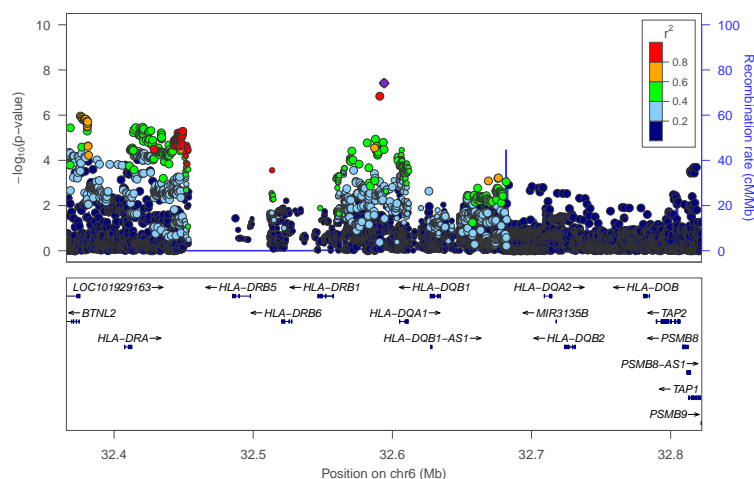

locus 210 rs10947428

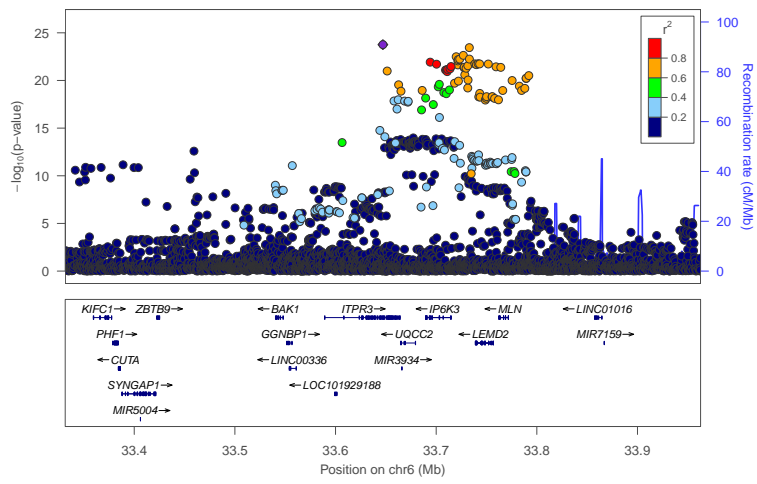

locus 211 rs9462029

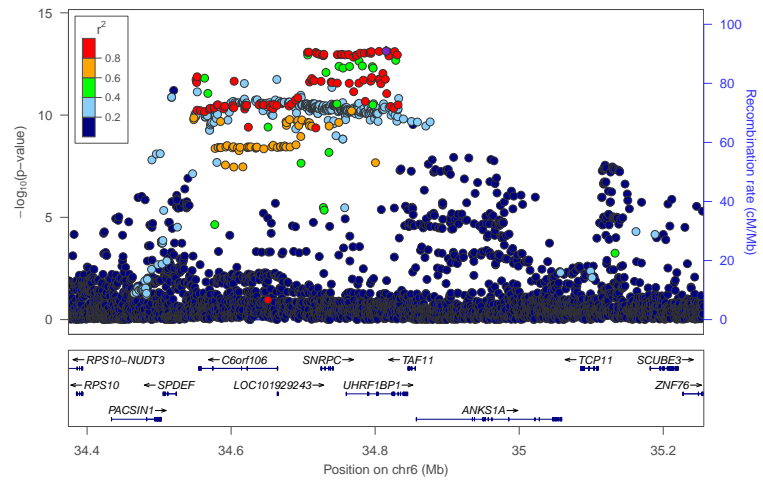

locus 212 rs9394502

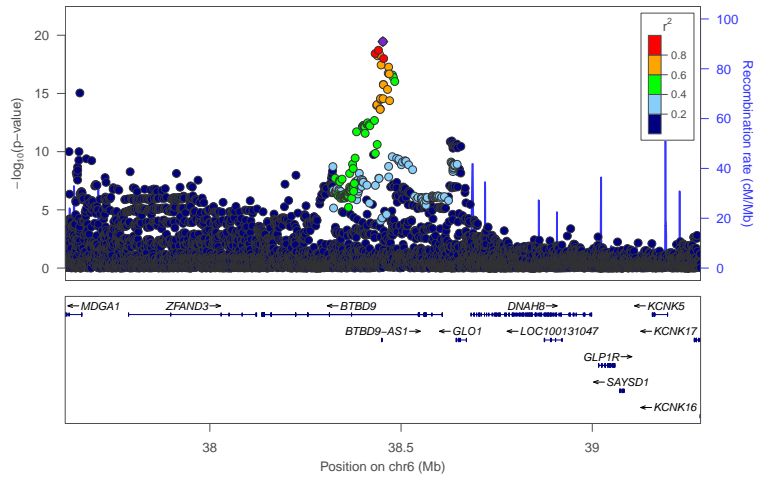

locus 213 rs9367074

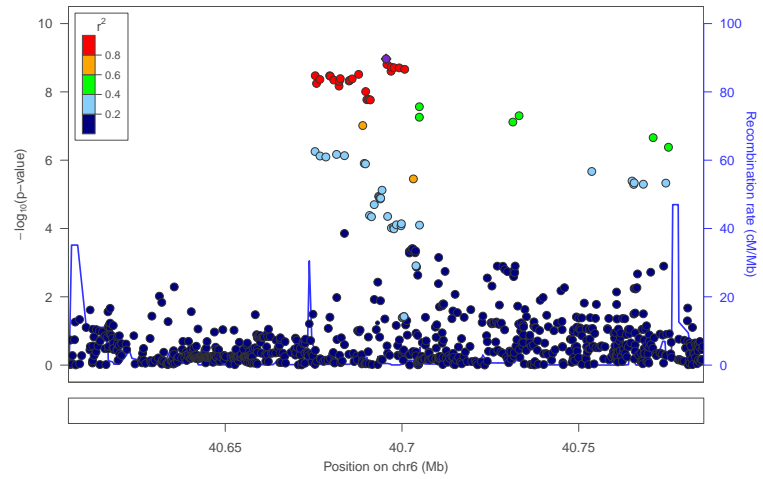

locus 214 rs62396748

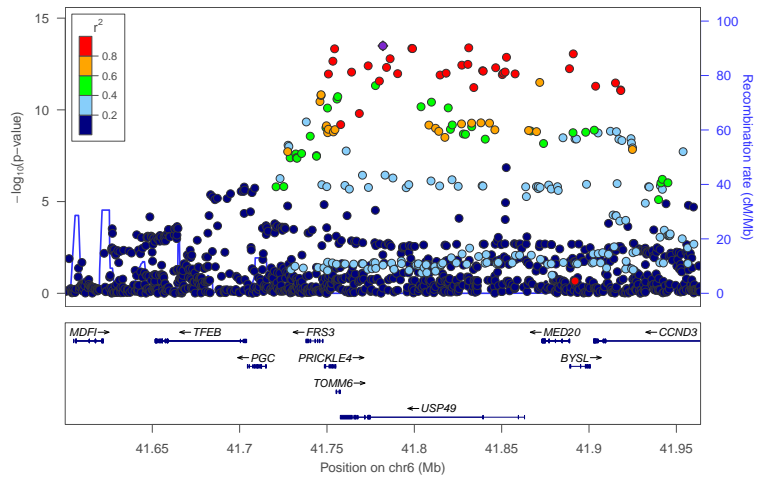

locus 215 rs833061

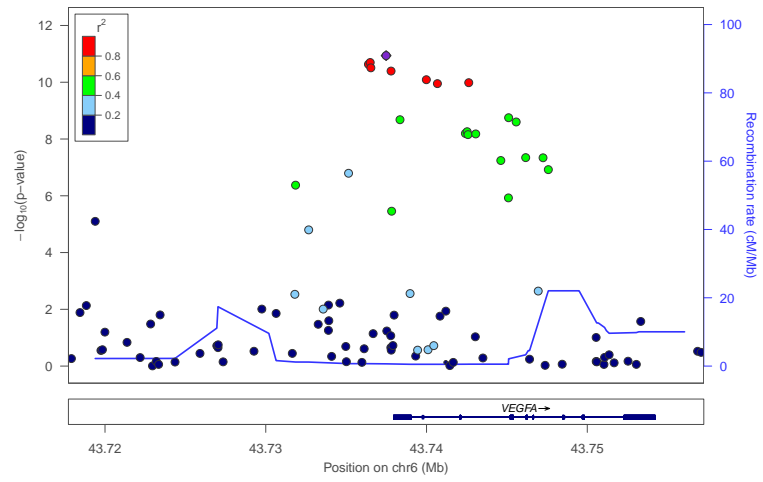

locus 216 rs16895508

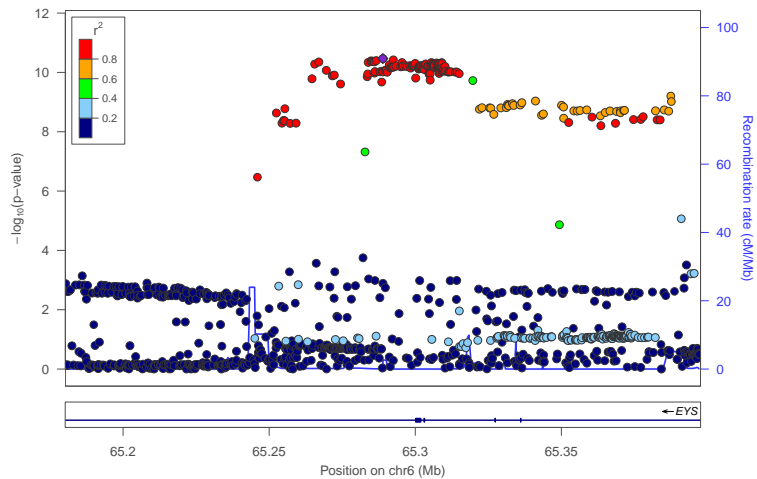

locus 217 rs13191563

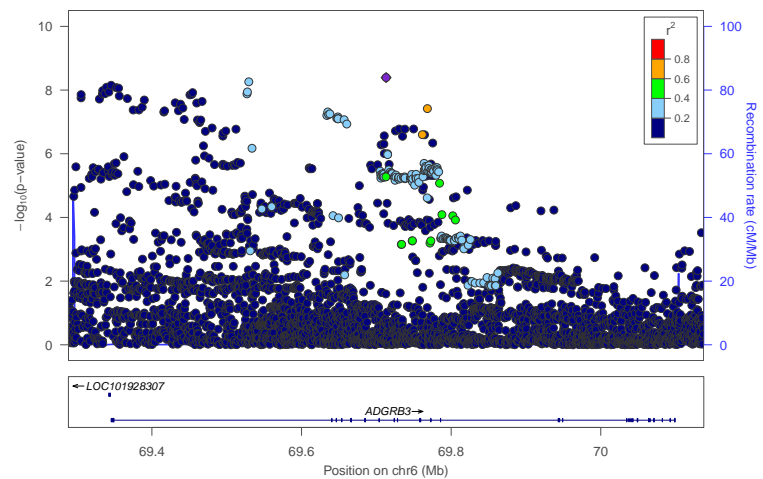

locus 218 rs615526

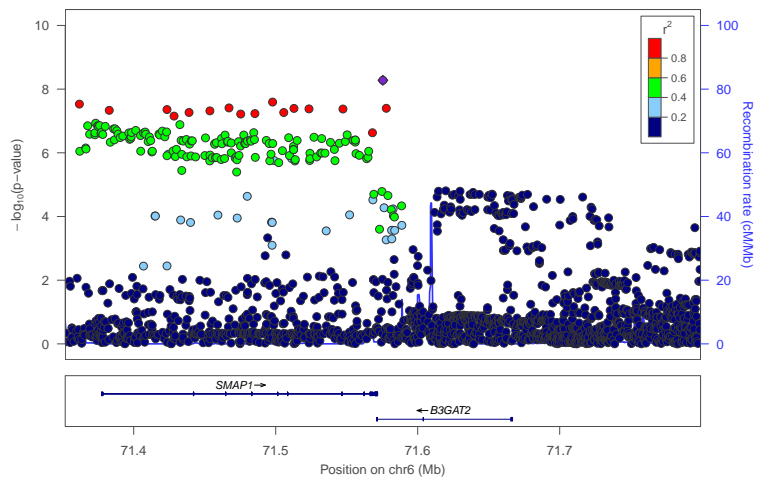

locus 219 rs1204329

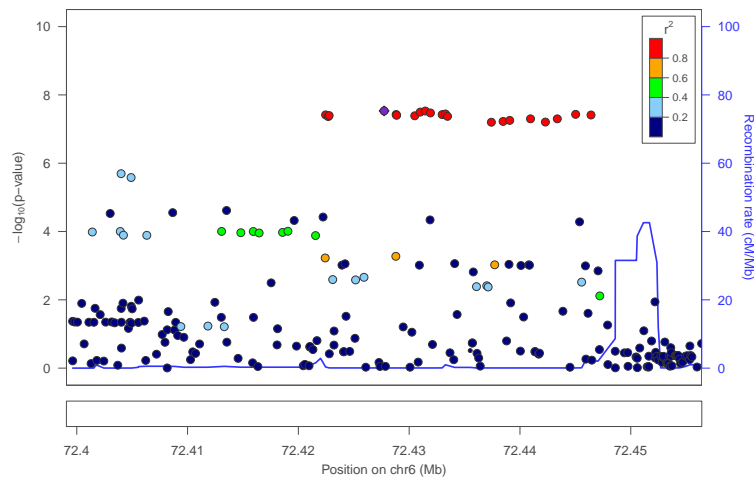

locus 220 rs9342993

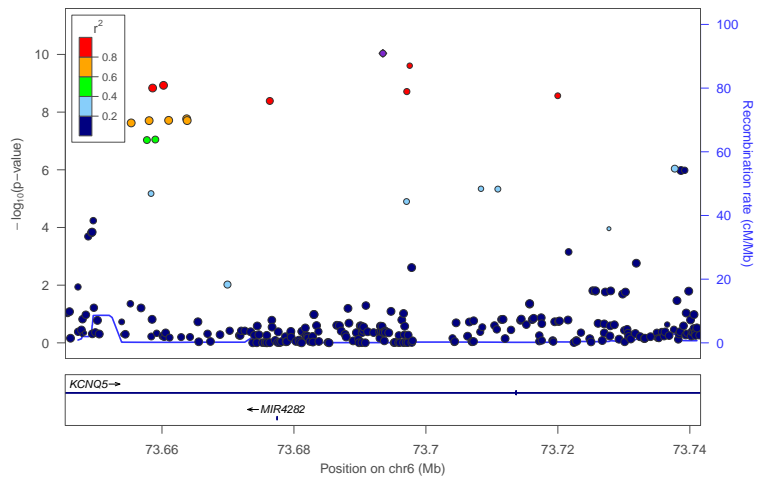

locus 221 rs16885957

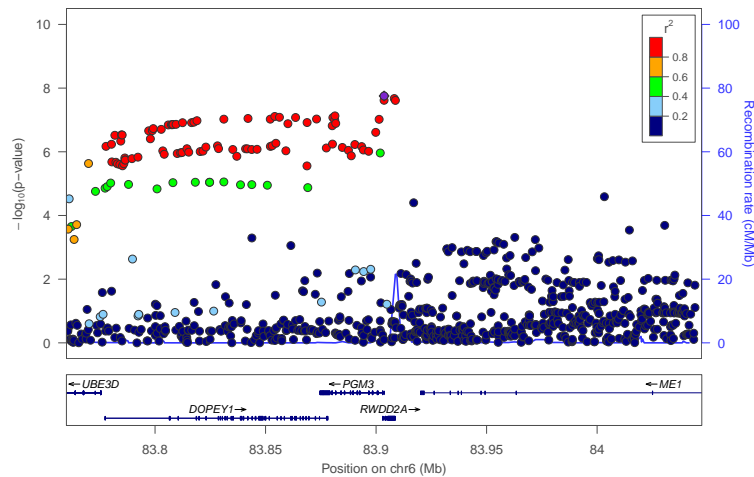

locus 222 rs62414180

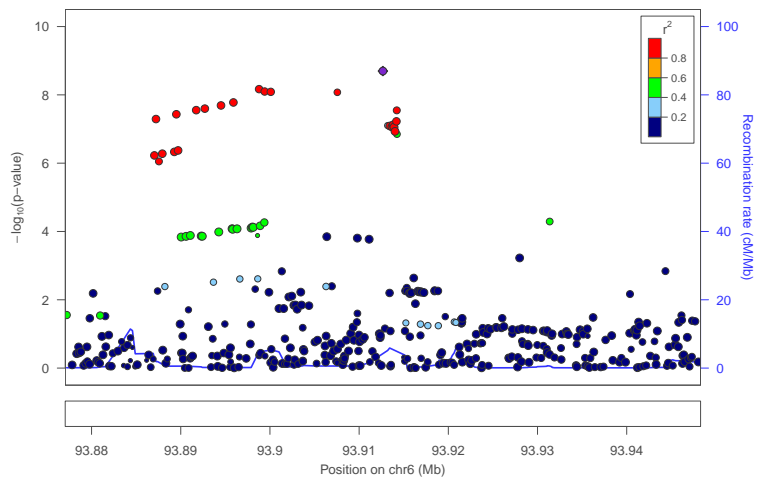

locus 223 rs9452444

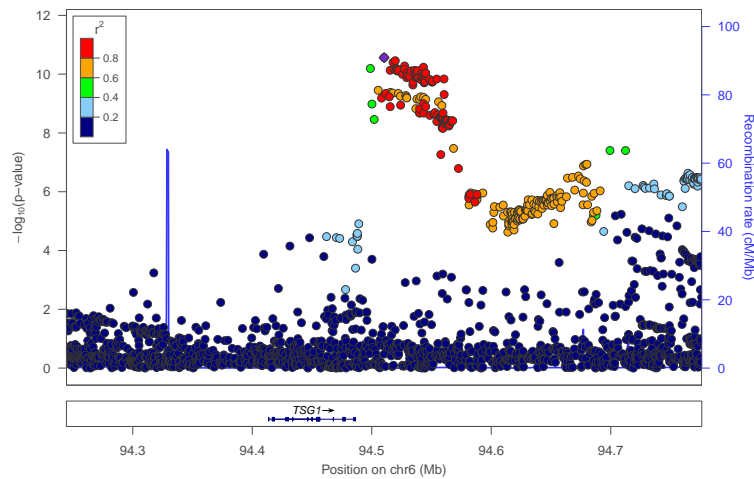

locus 224 rs9375945

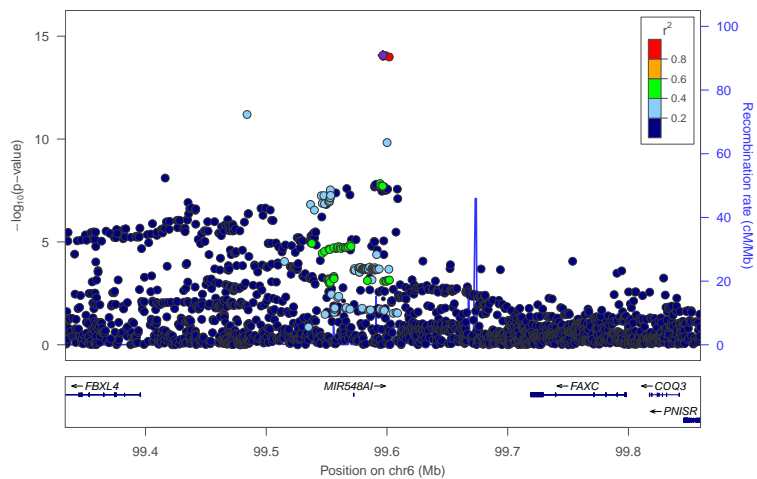

locus 225 rs240110

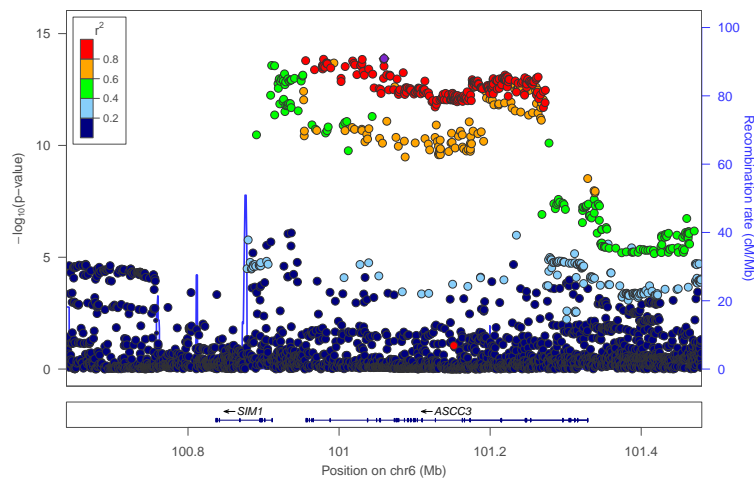



locus 226 rs314281

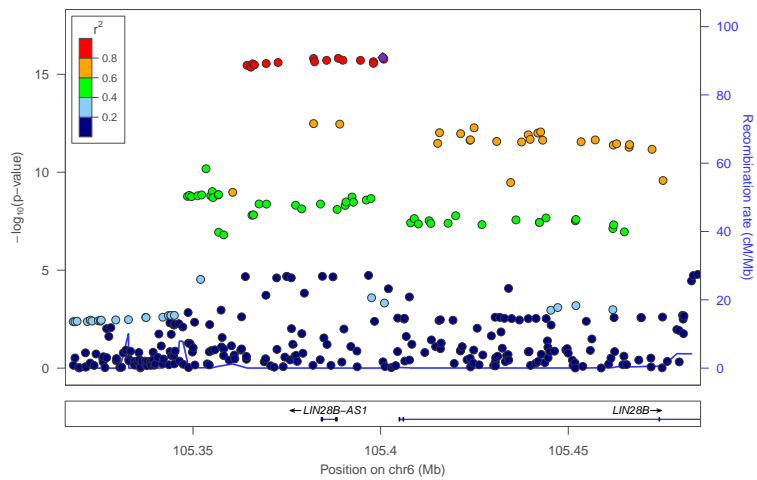

locus 228 rs6149792

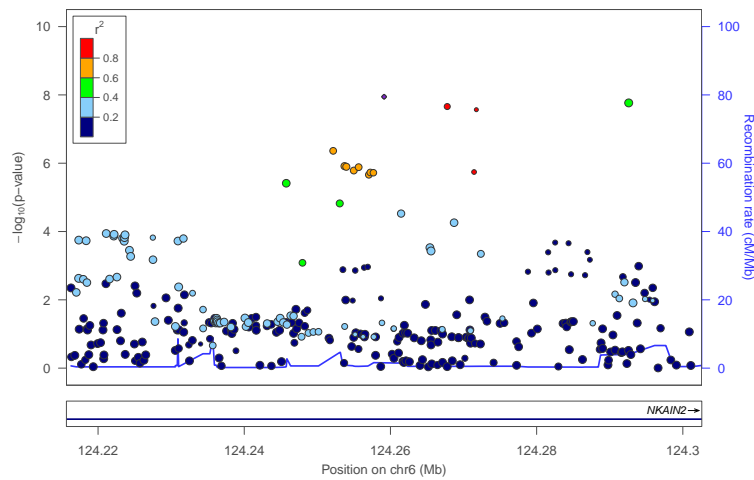

locus 229 rs62429521

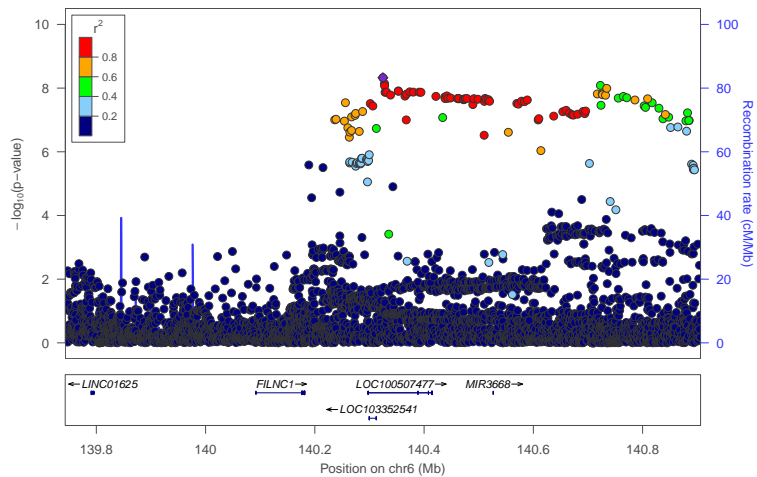

locus 230 rs1789695

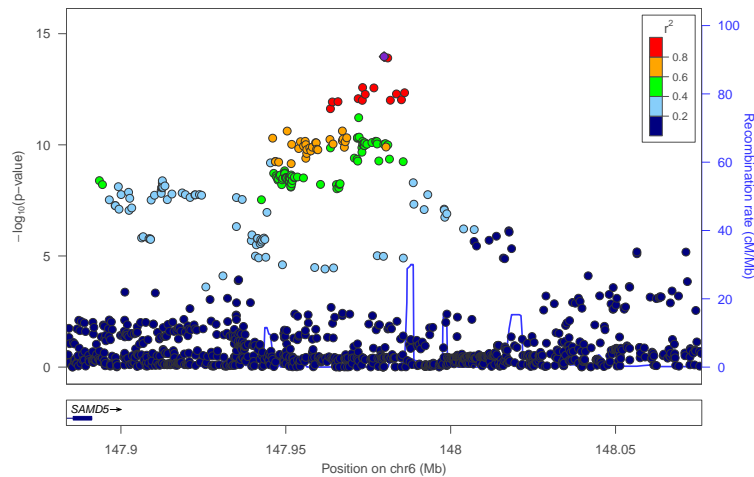

locus 231 rs13210756

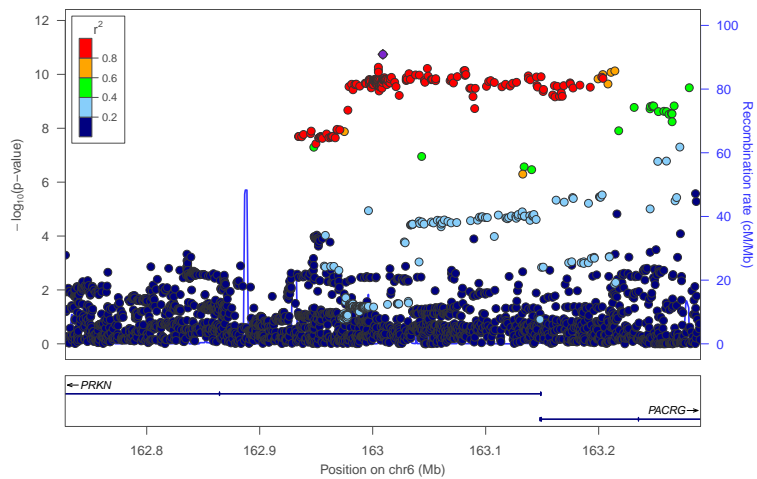

locus 232 rs62444044

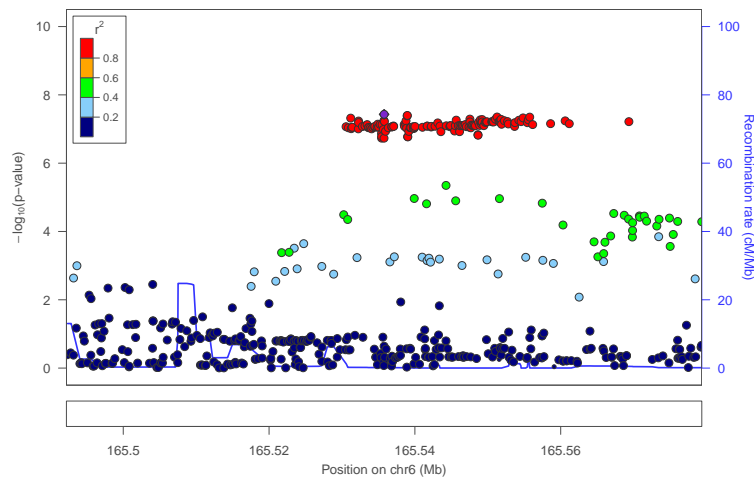

locus 233 rs55790766

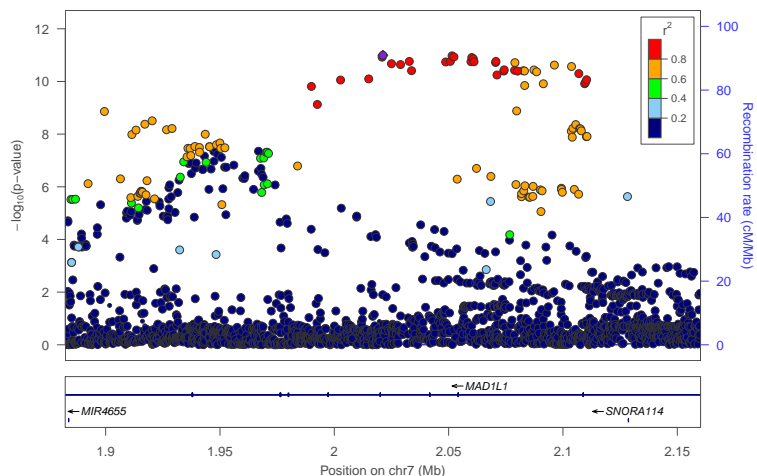

locus 234 rs73033403

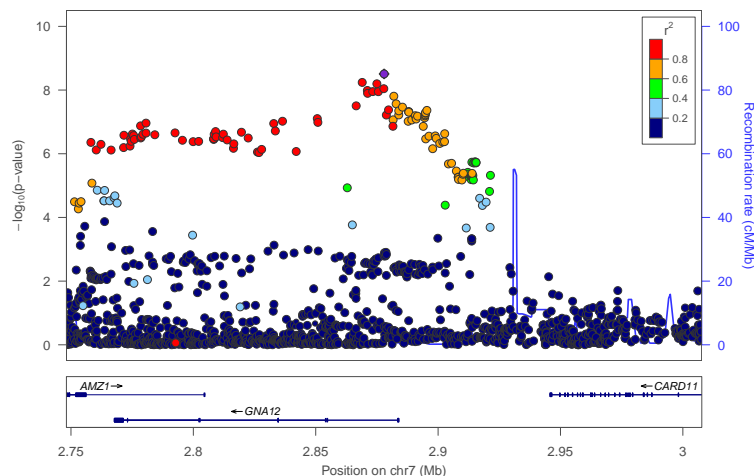

locus 235 rs75218827

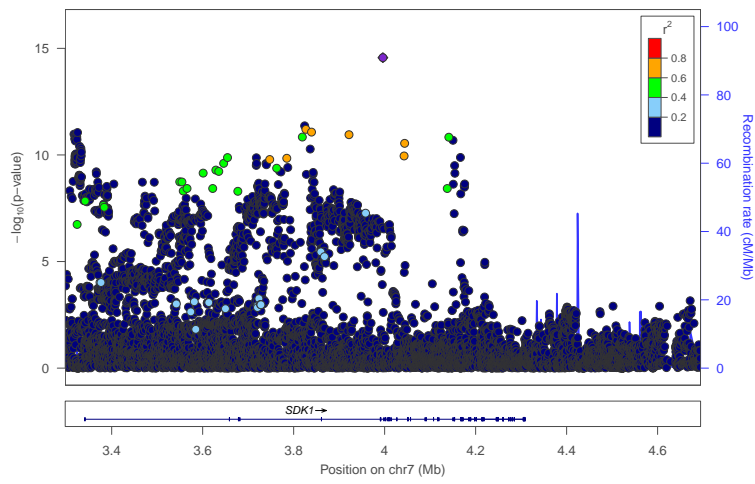

locus 236 rs138713861

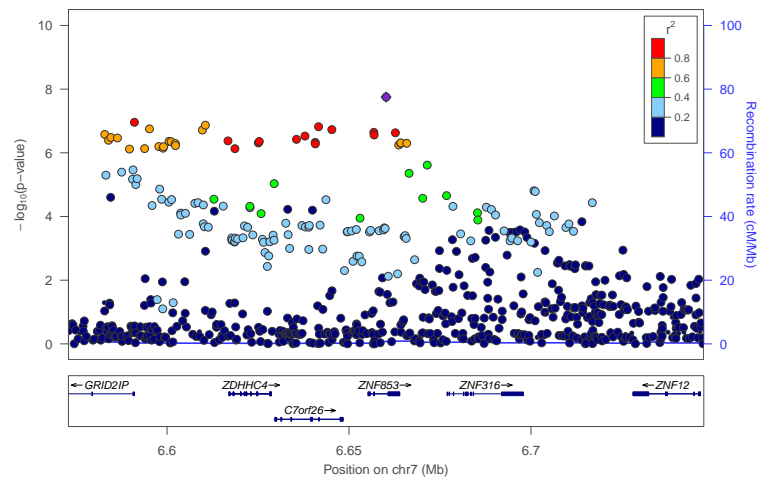

locus 237 rs5010183

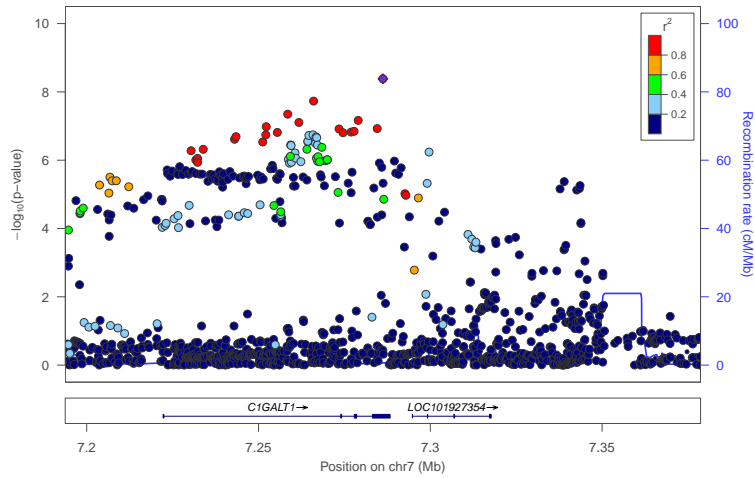

locus 238 rs4721061

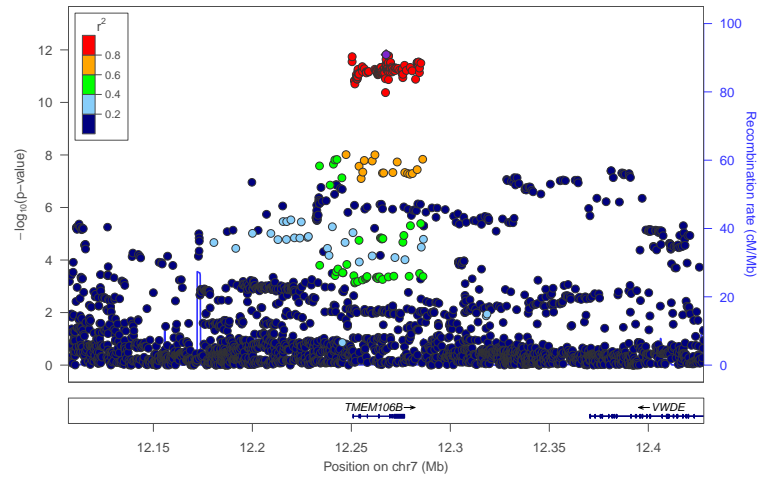

locus 239 rs12333379

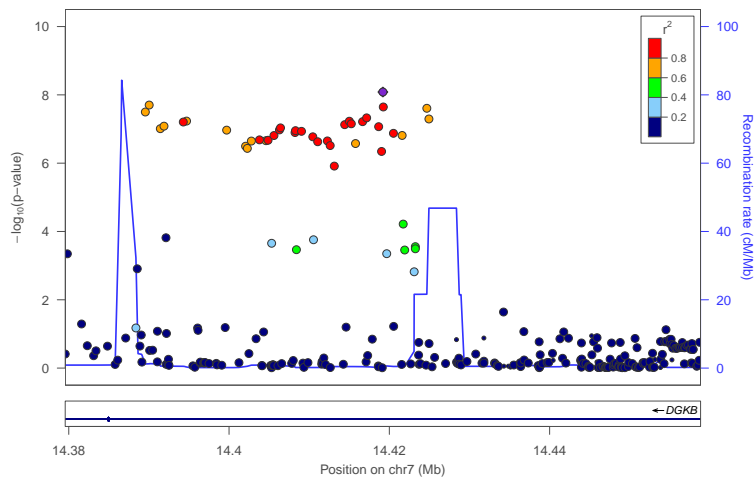

locus 240 rs2158414

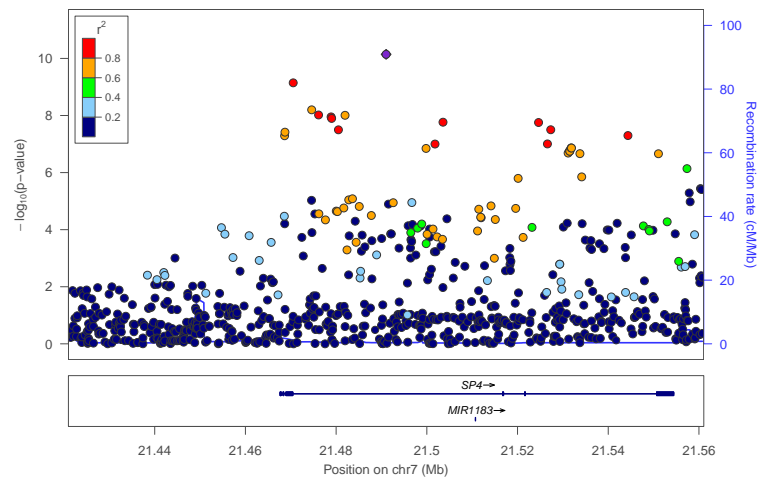

locus 241 rs7805564

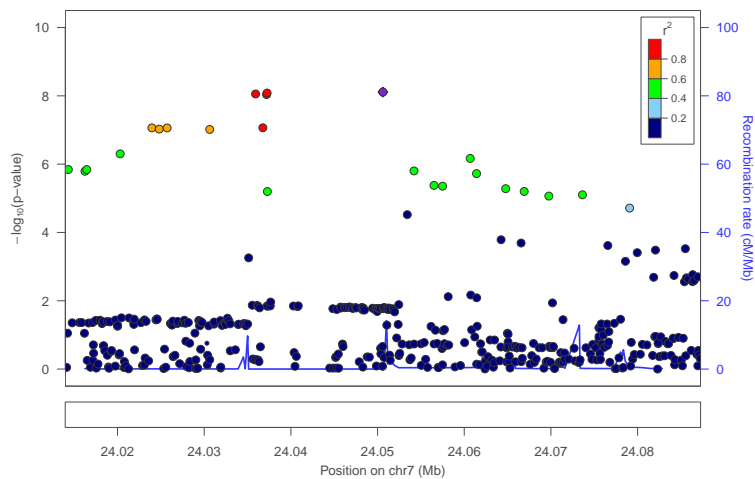

locus 242 rs5883355

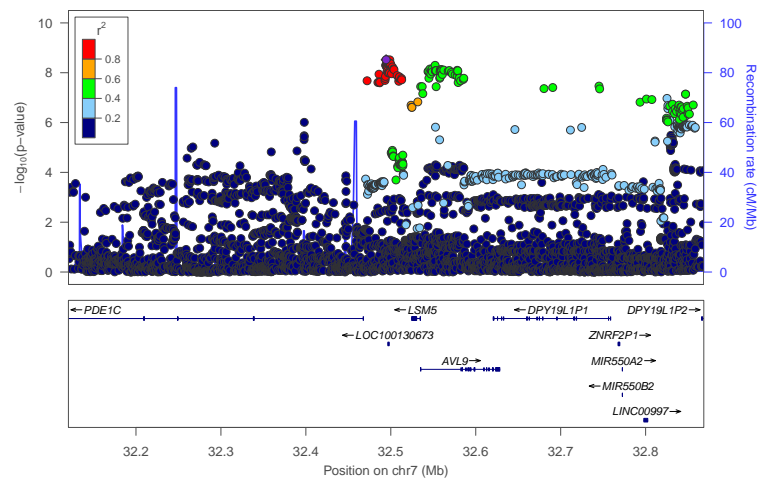

locus 243 rs62442231

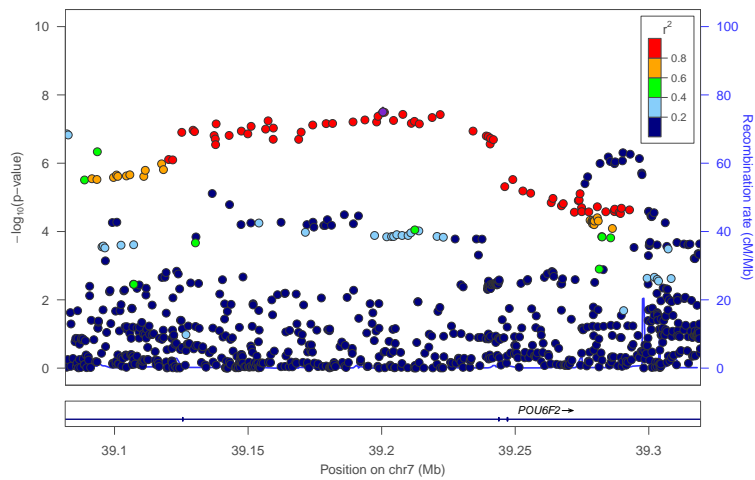

locus 244 rs10234070

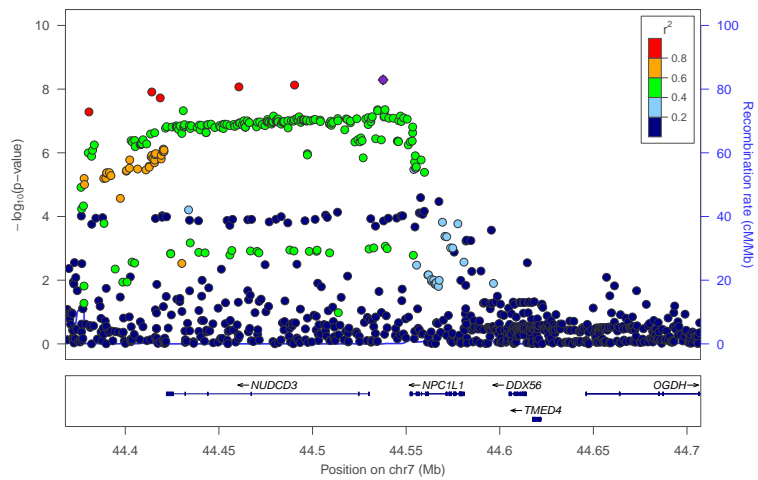

locus 245 rs73696927

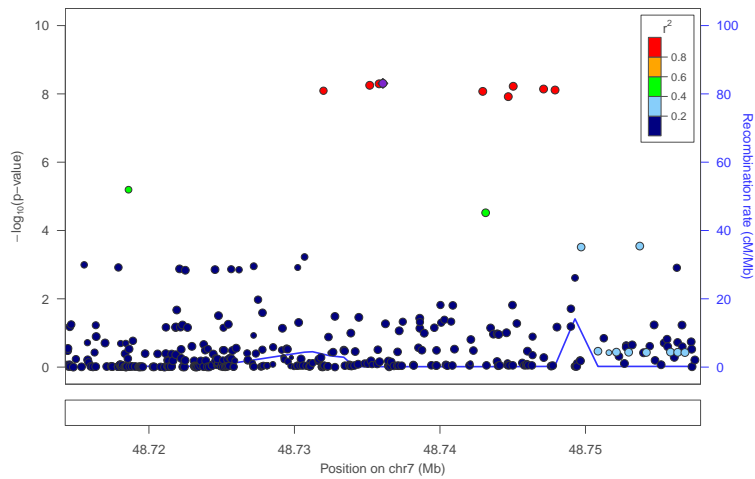

locus 246 rs11765062

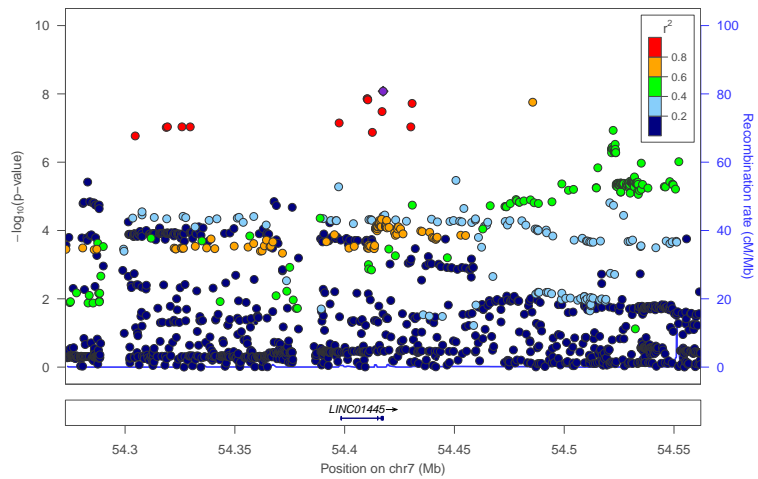

locus 247 rs60510343

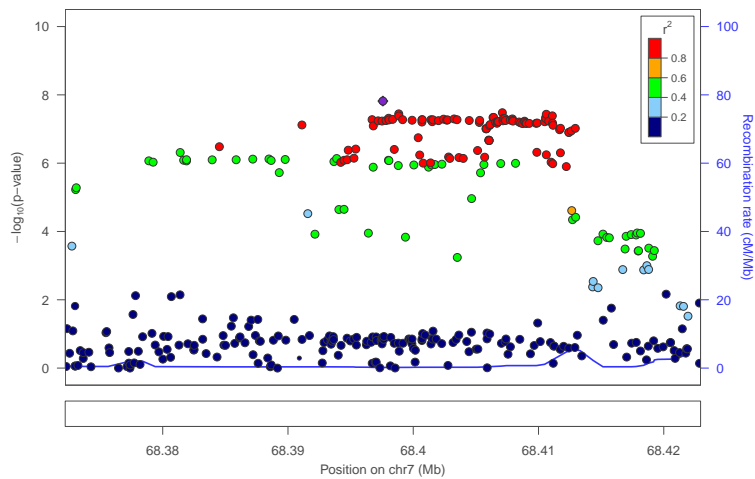

locus 248 rs11984380

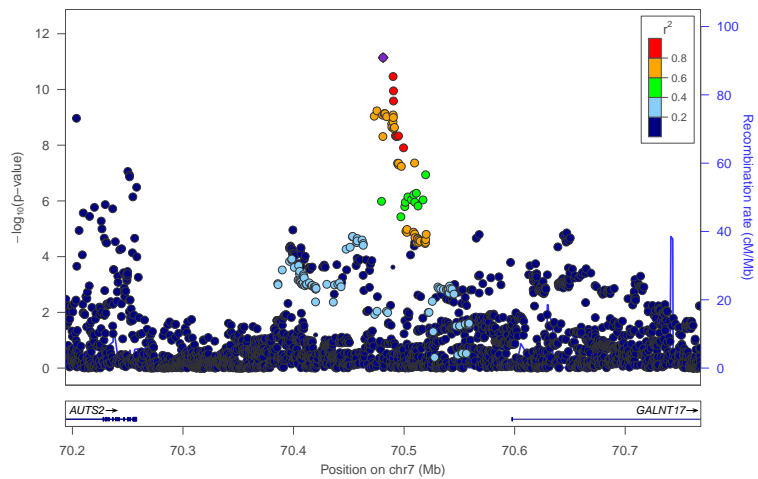

locus 249 rs35659126

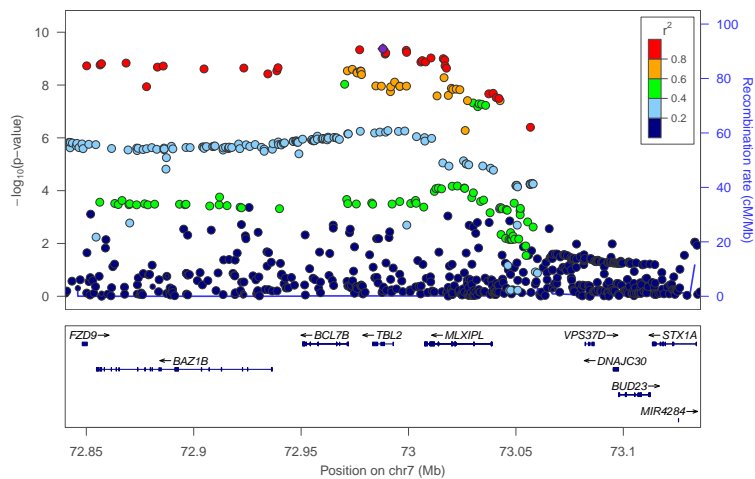

locus 250 rs1468774

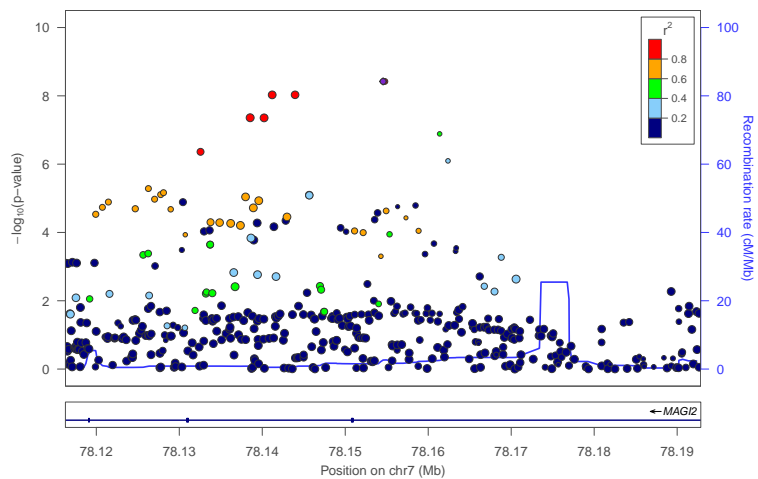

locus 251 rs10269321

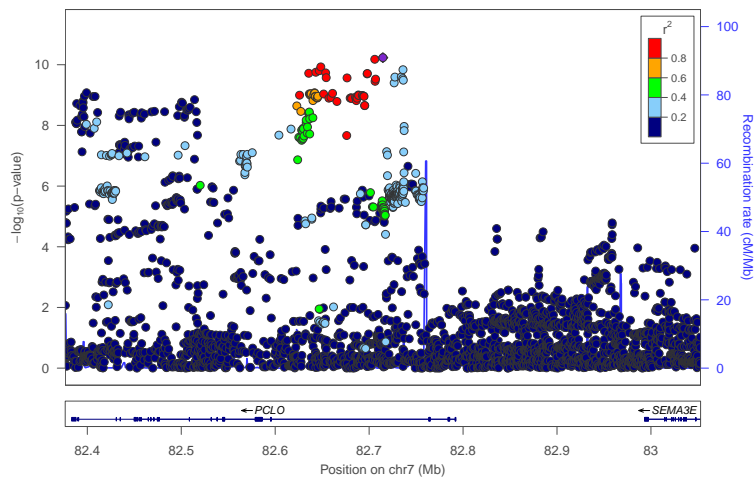

locus 252 rs11980428

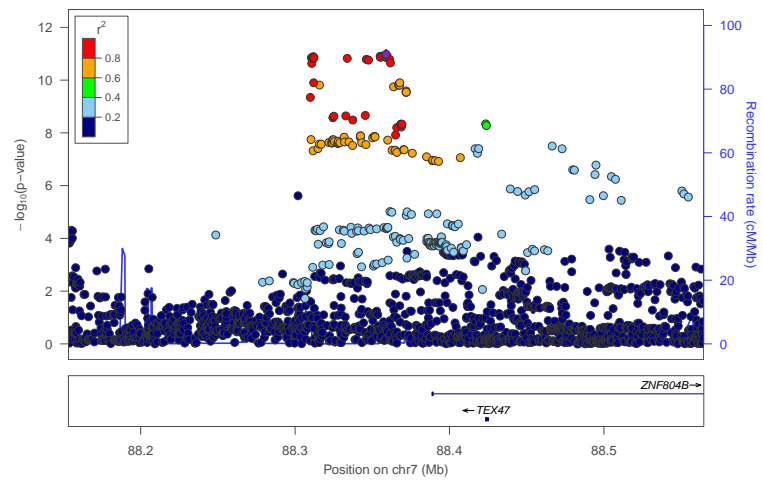

locus 253 rs6965799

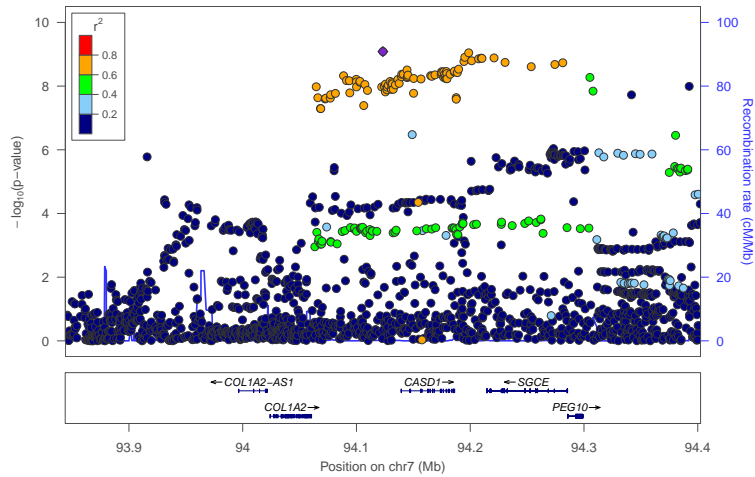

locus 254 rs66526712

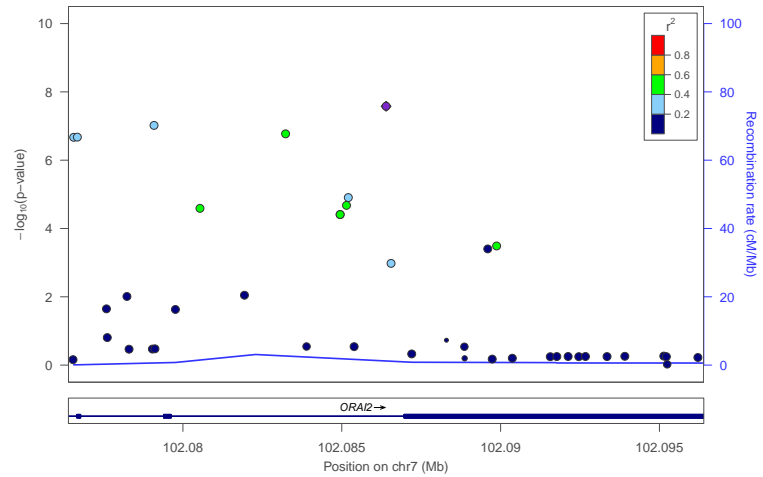

locus 255 rs6949391

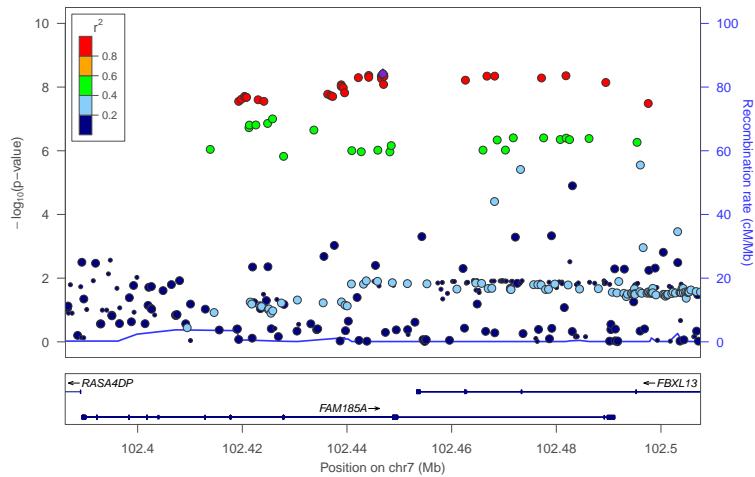

locus 256 rs112583482

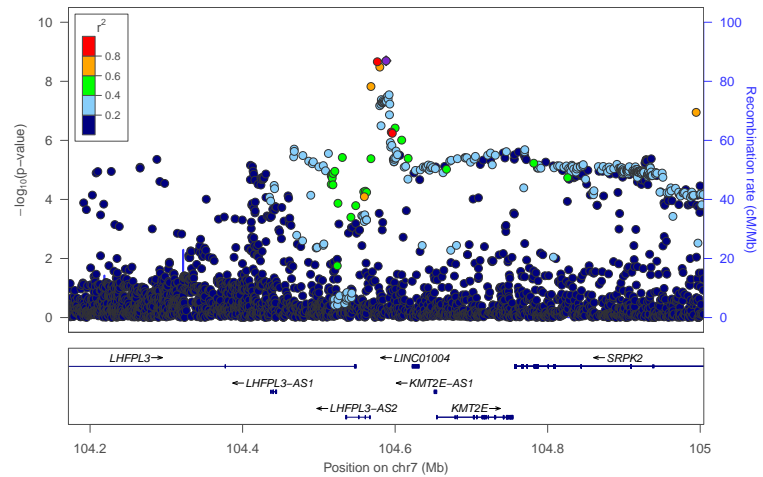

locus 257 rs76924513

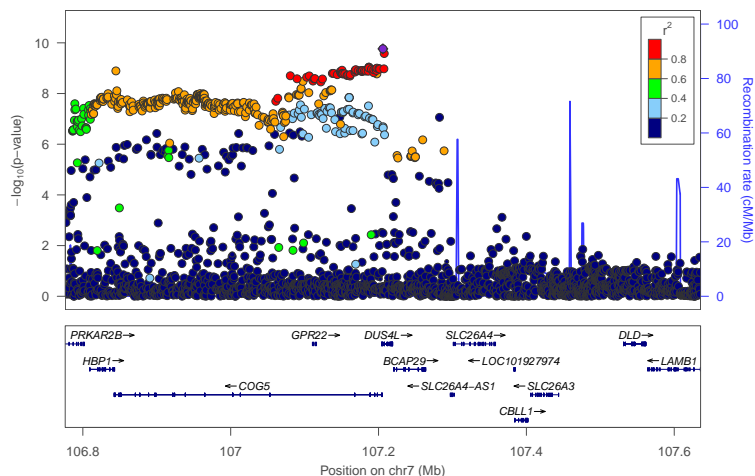

locus 258 rs1513922

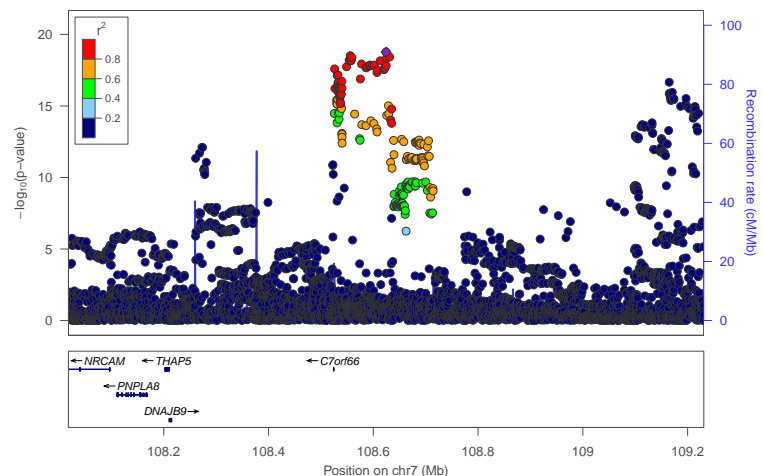



locus 259 rs2528691

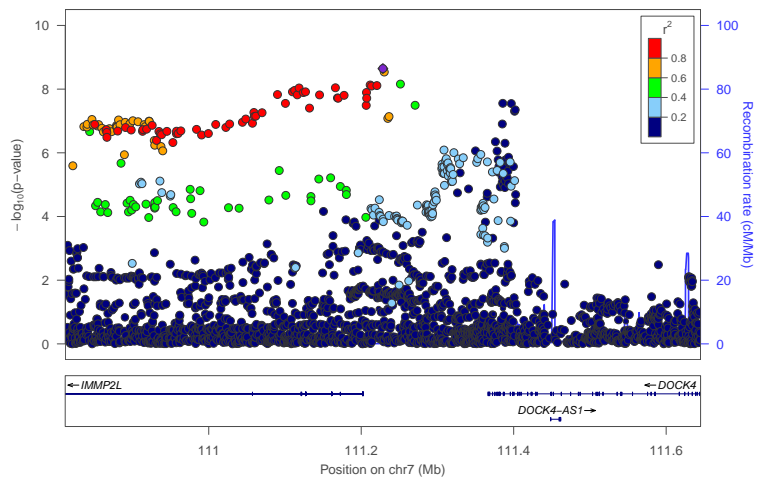

locus 260 rs8180817

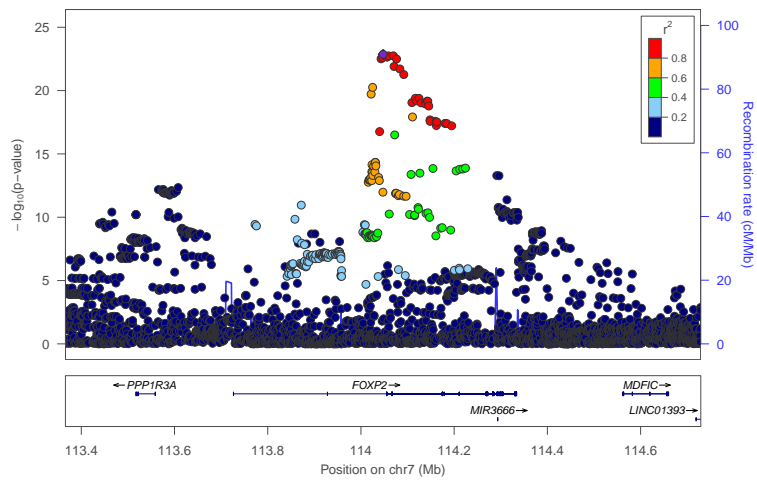

locus 261 rs1358393

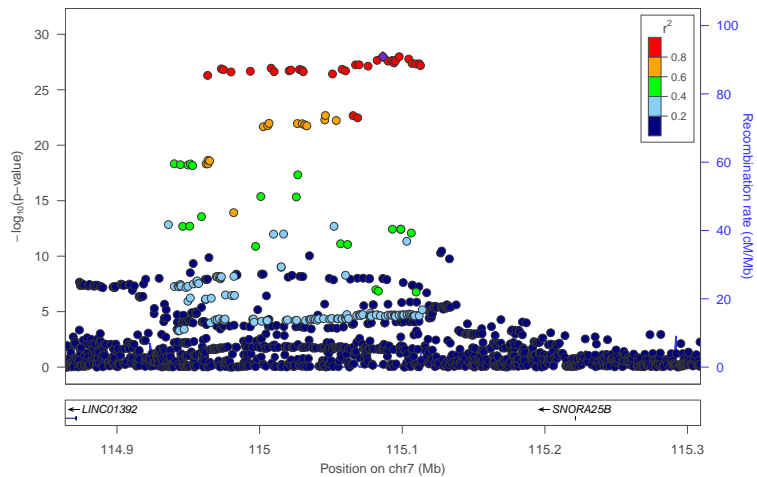

locus 262 rs35590186

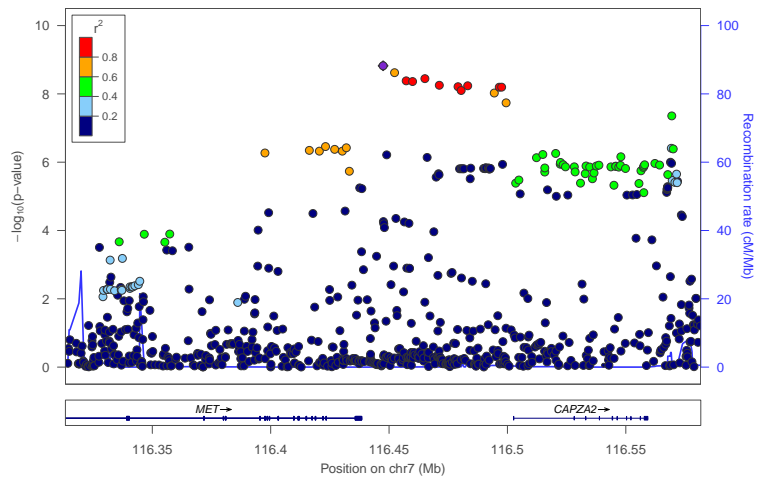

locus 263 rs1156954

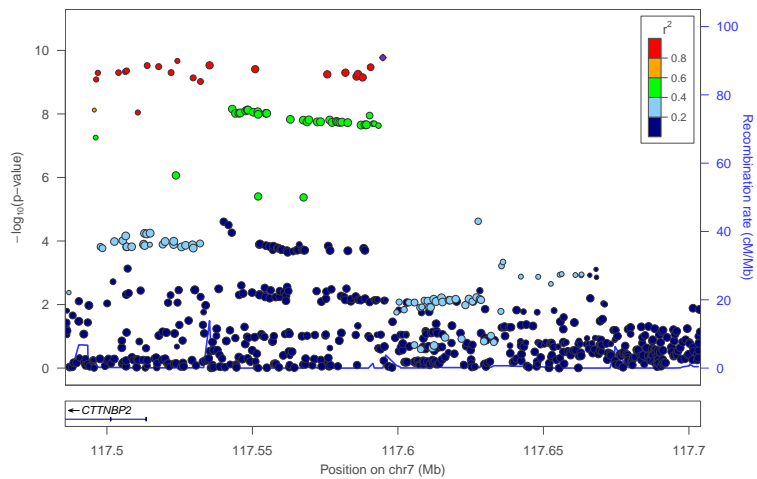

locus 264 rs62472321

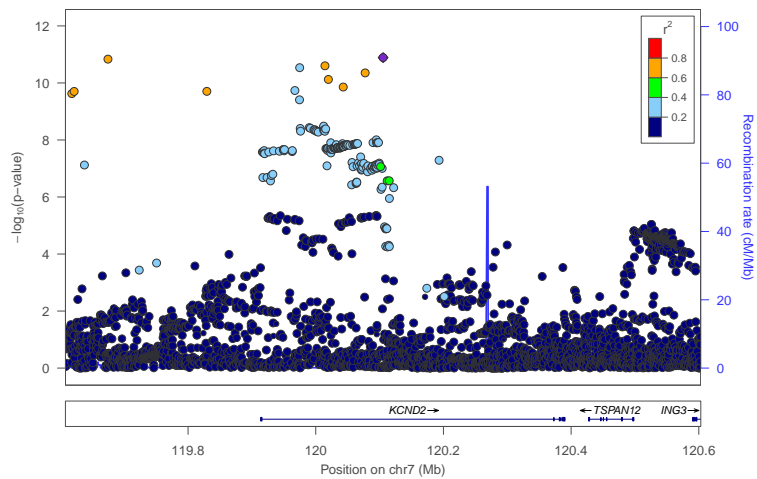

locus 265 rs7778413

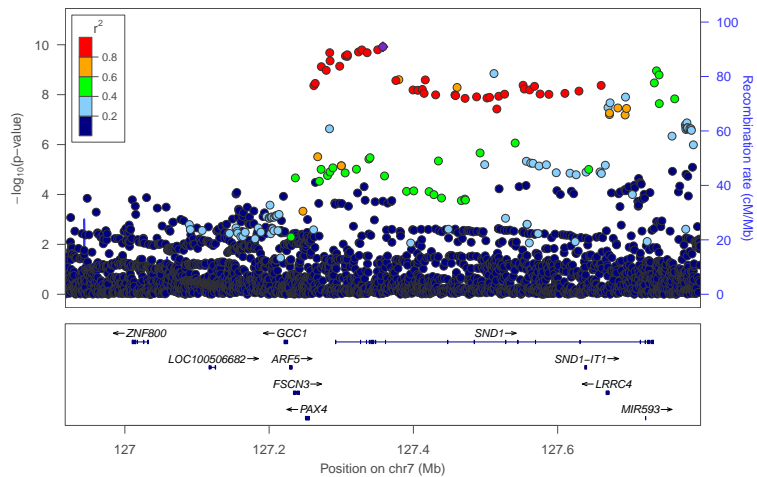

locus 266 rs56182580

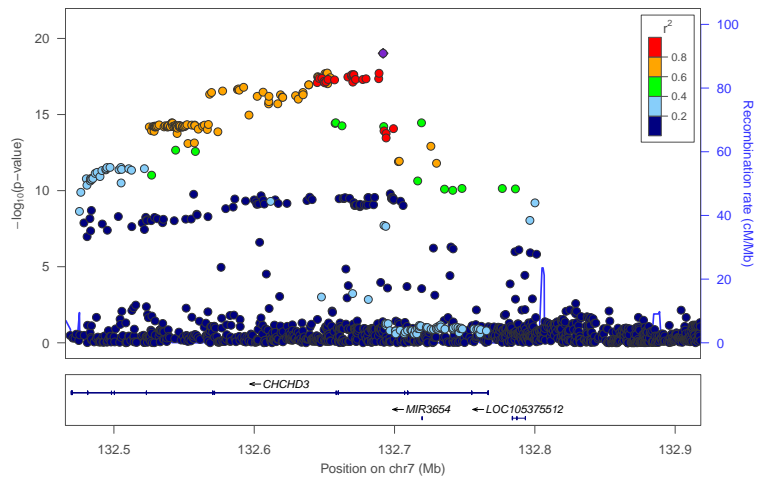

locus 267 rs2544211

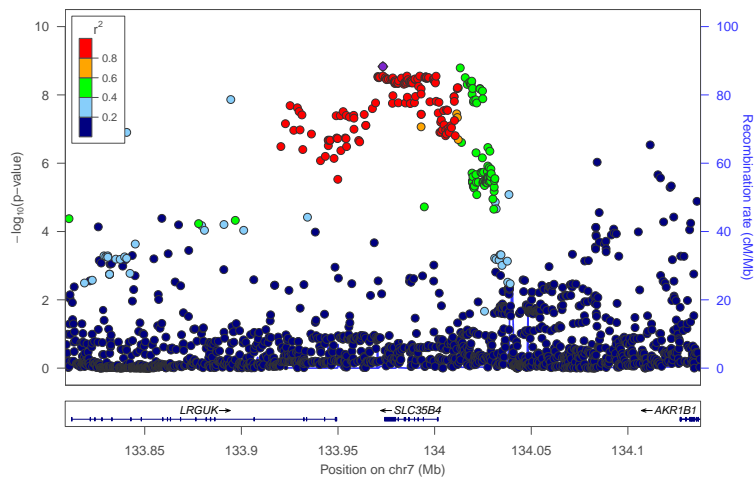

locus 268 rs1731951

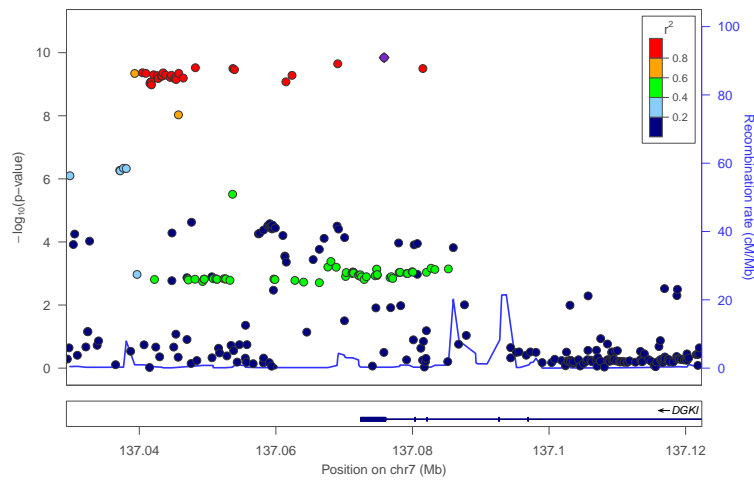

locus 269 rs13269117

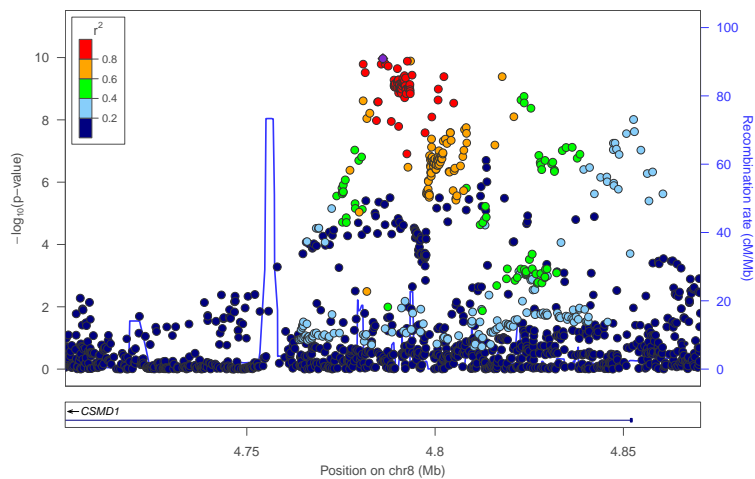

locus 270 rs6601426

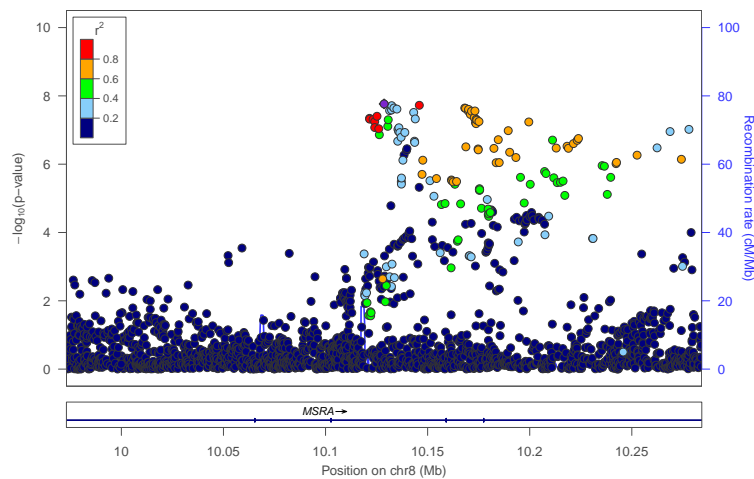

locus 271 rs4831647

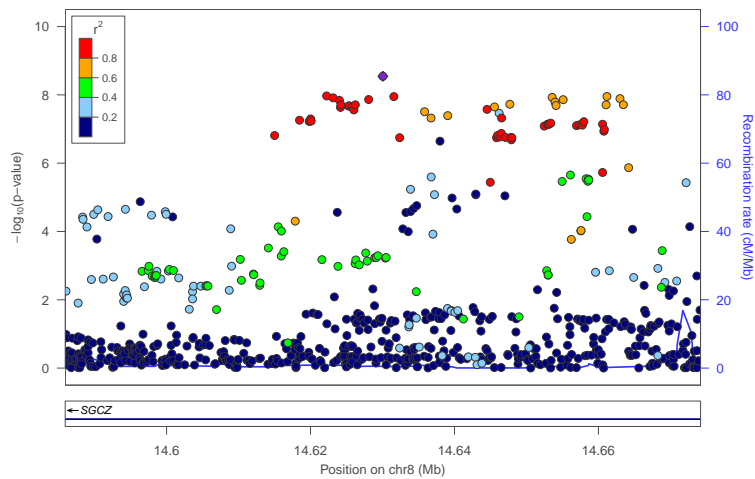

locus 272 rs2616192

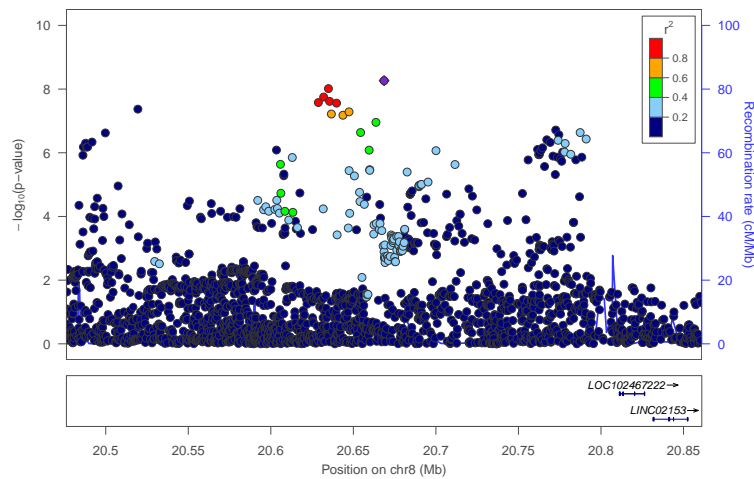

locus 273 rs751680

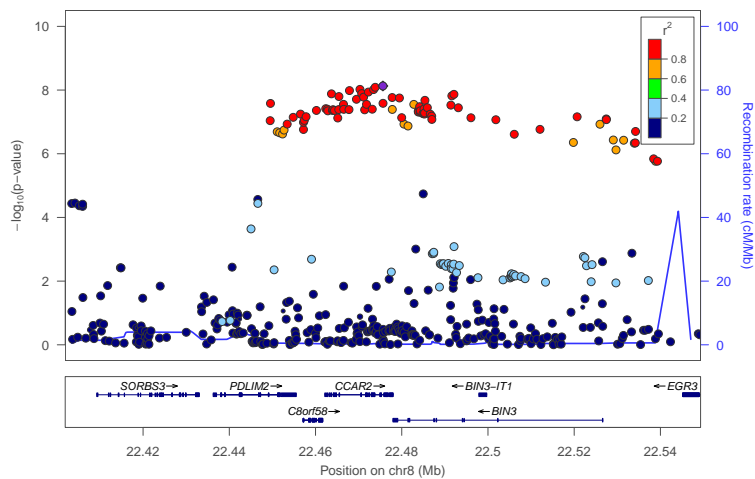

locus 274 rs62501777

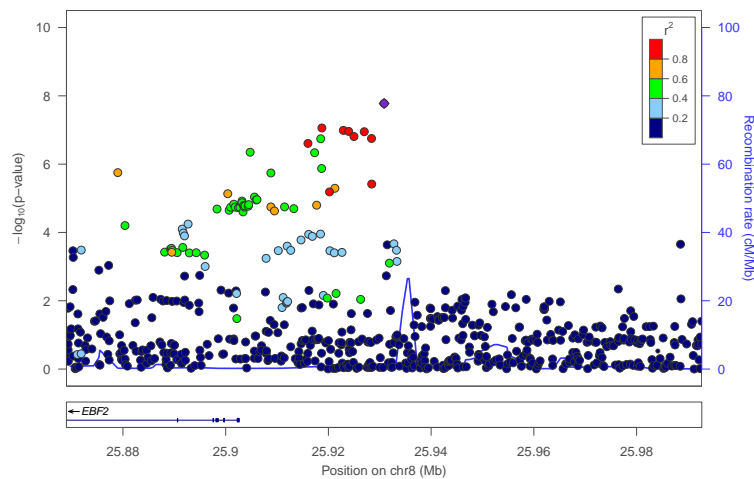

locus 275 rs10110224

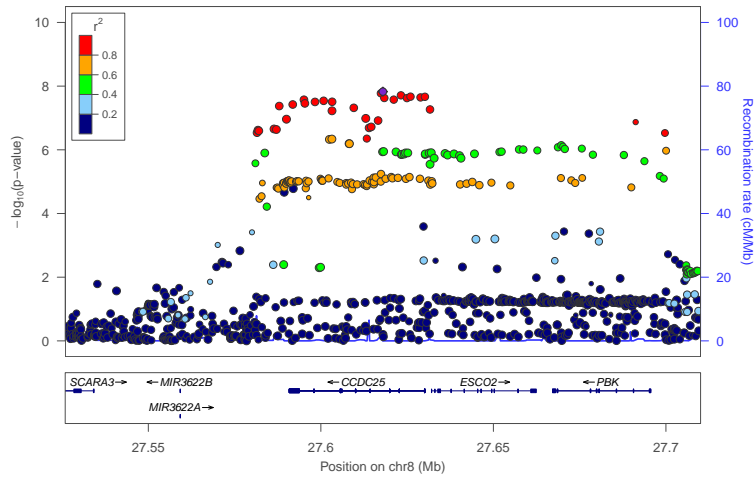

locus 276 rs2344121

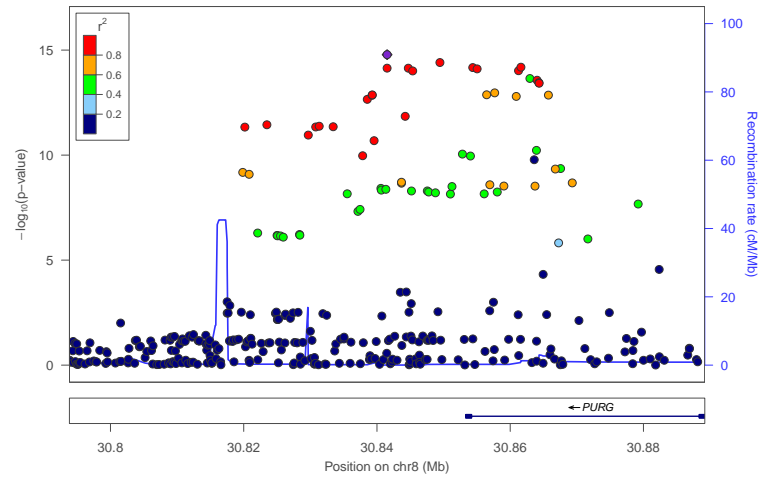

locus 277 rs1383890

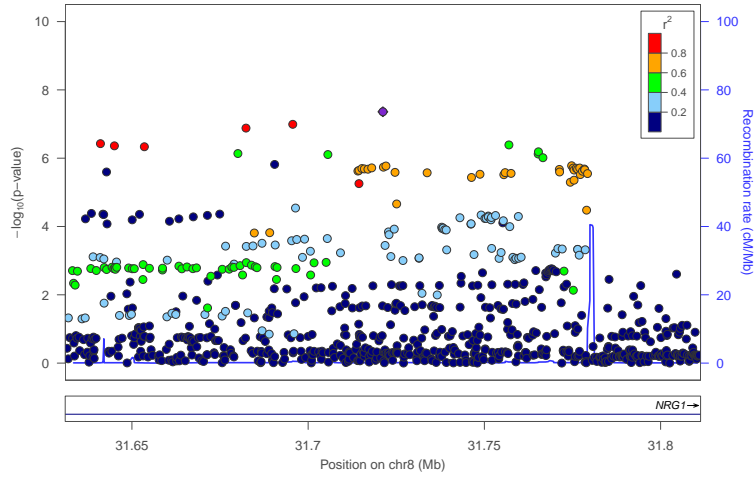

locus 278 rs79050075

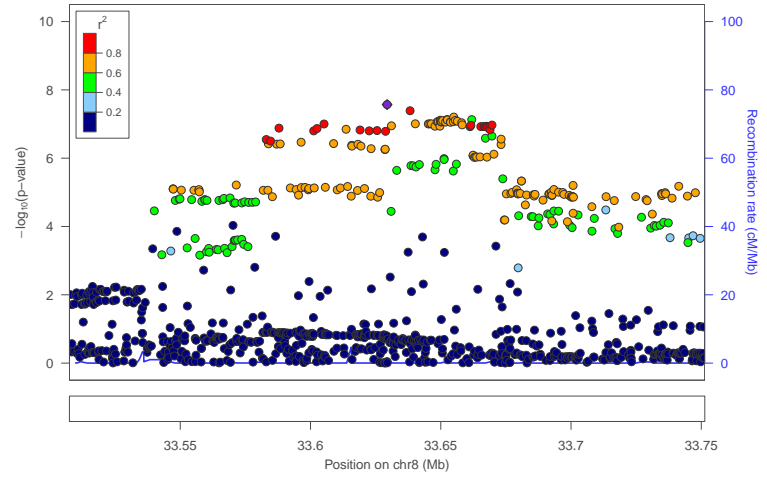

locus 279 rs573937698

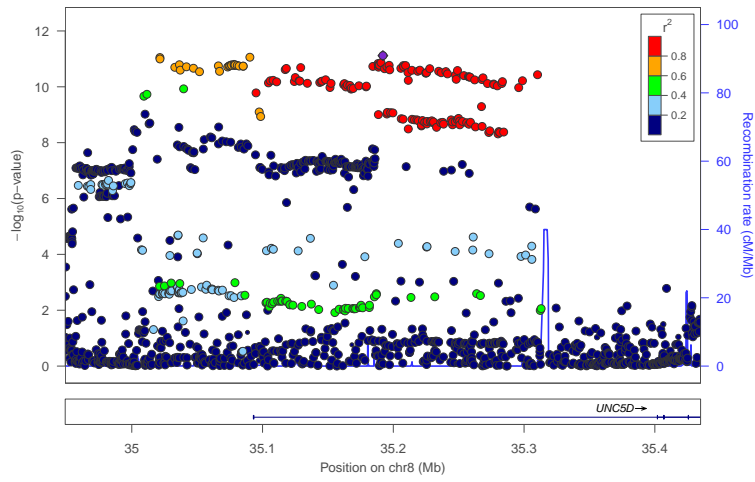

locus 280 rs5891160

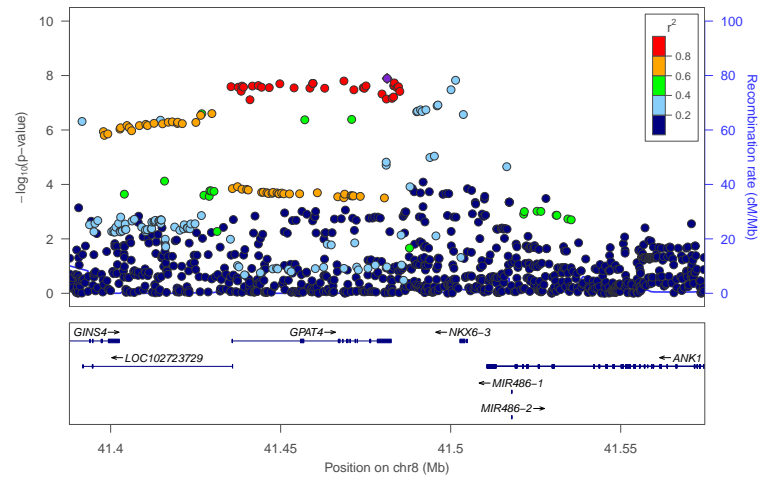

locus 281 rs12677105

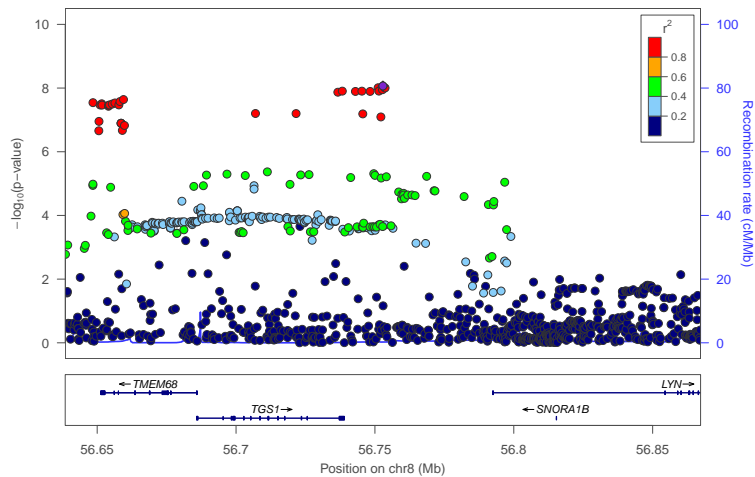

locus 282 rs10092649

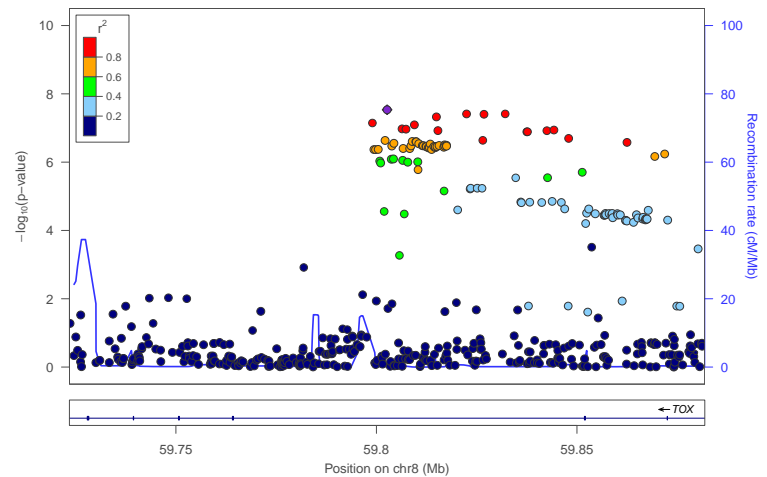

locus 283 rs643730

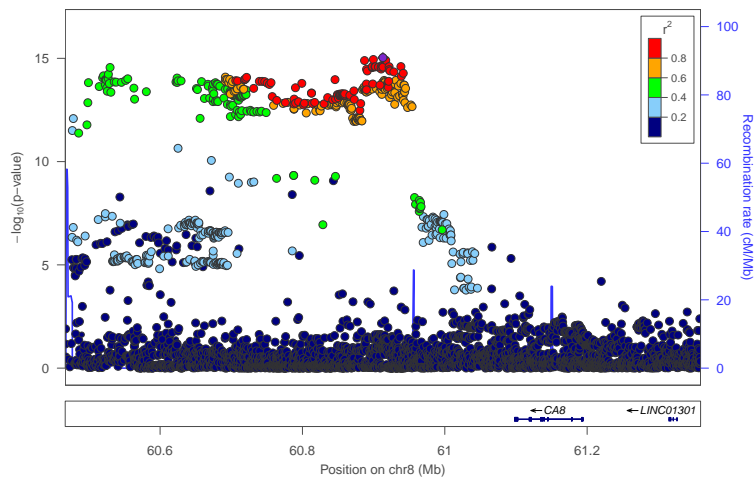

locus 284 rs77753524

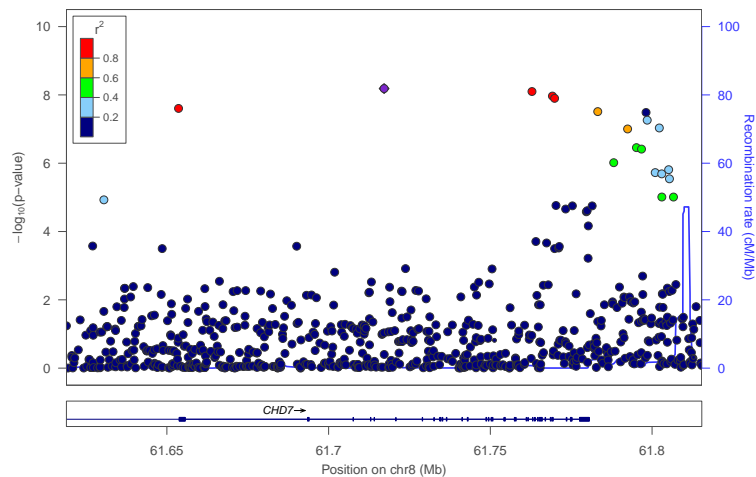

locus 285 rs10957292

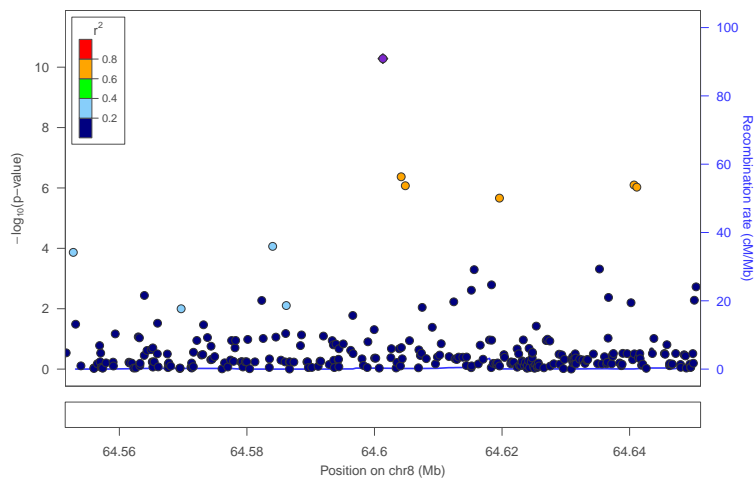

locus 286 rs298195

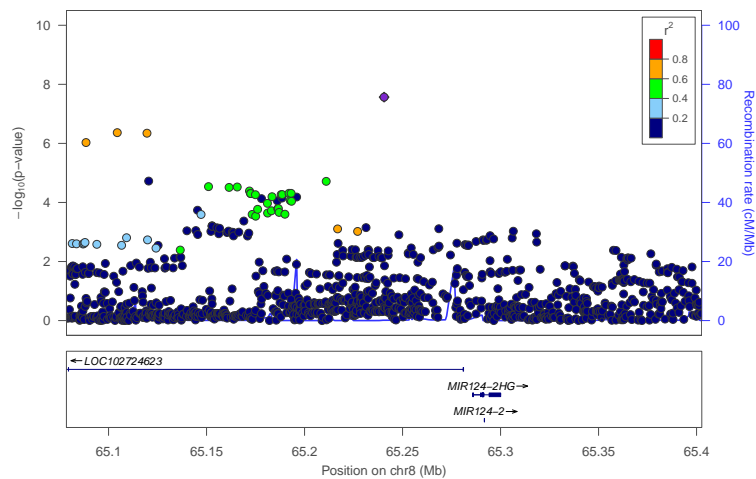

locus 287 rs10104523

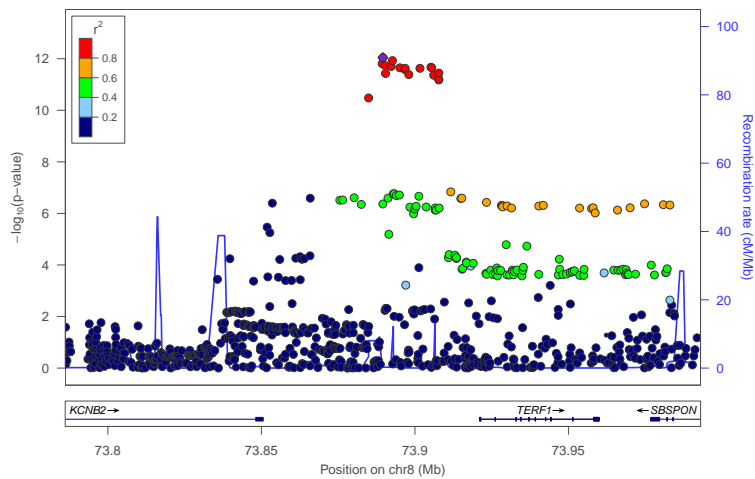

locus 288 rs35862289

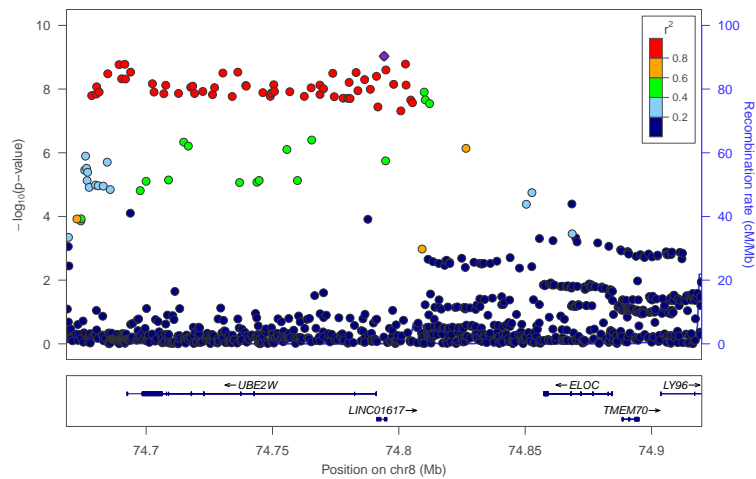

locus 289 rs1070036

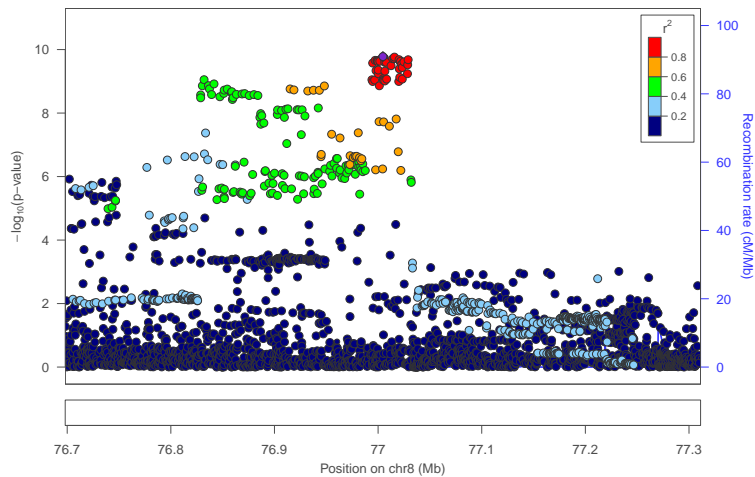

locus 290 rs4735738

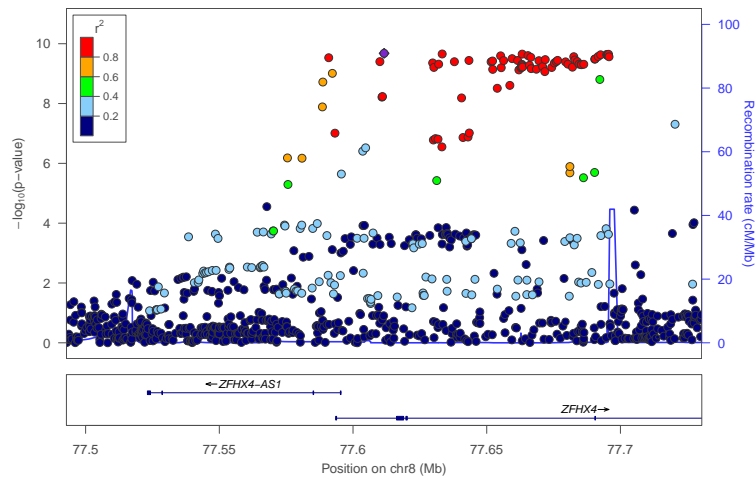



locus 291 rs4409363

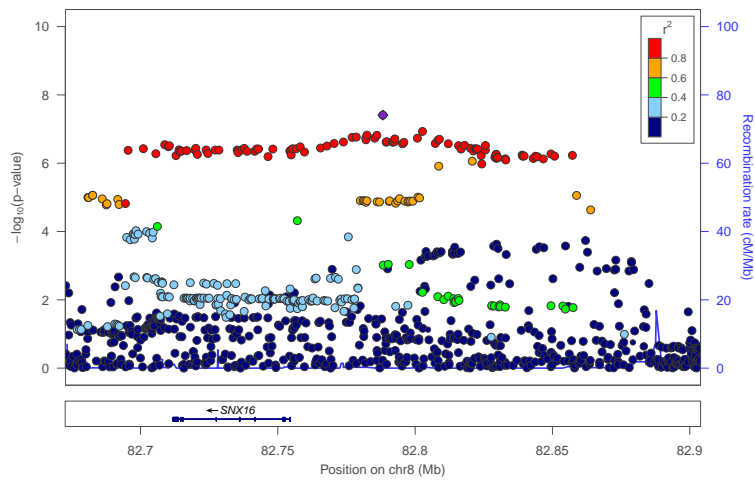

locus 292 rs62530187

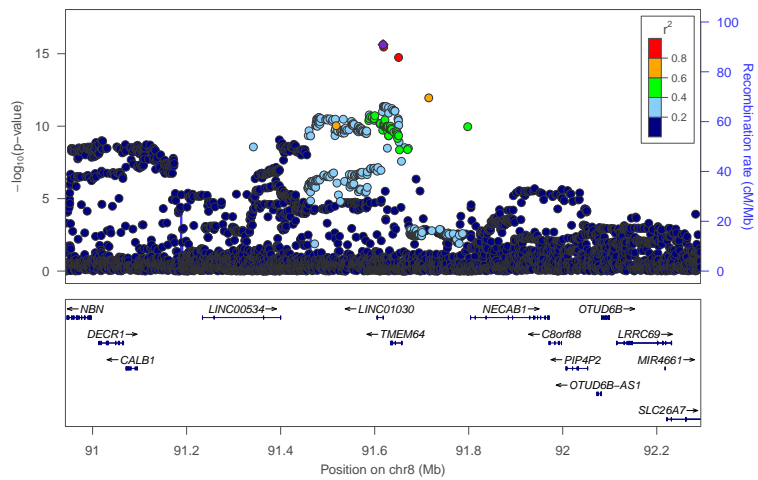

locus 293 rs7844069

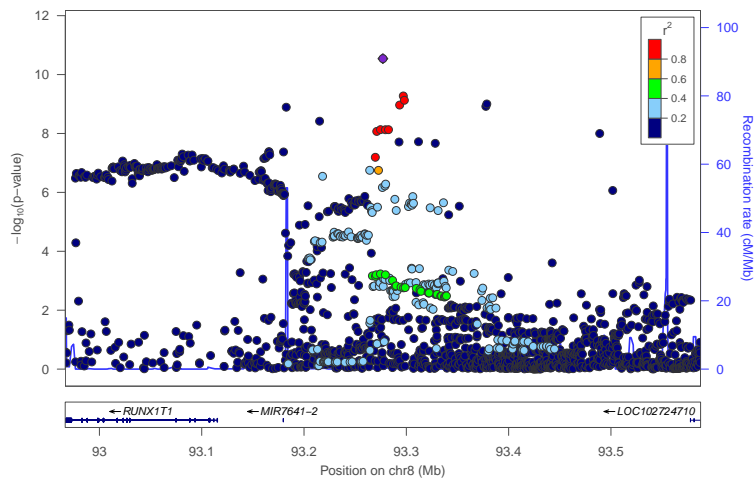

locus 294 rs56402193

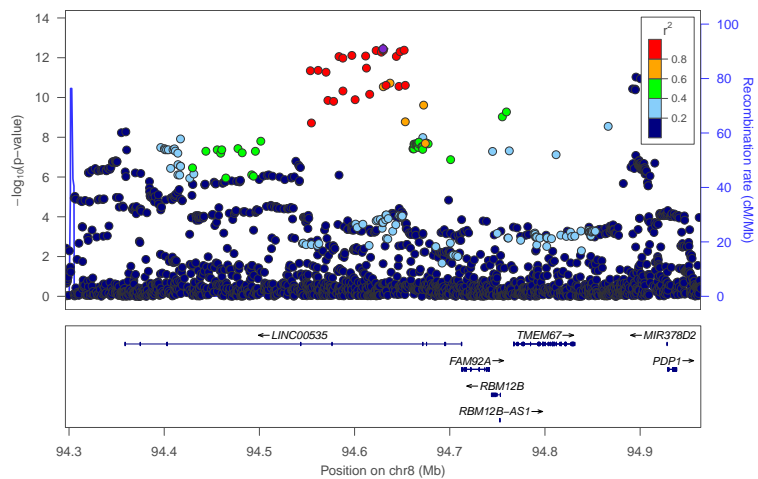

locus 295 rs11412375

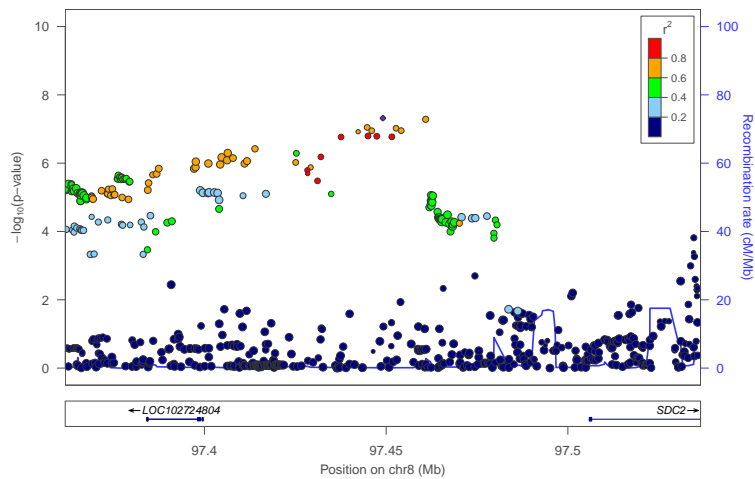

locus 296 rs28552587

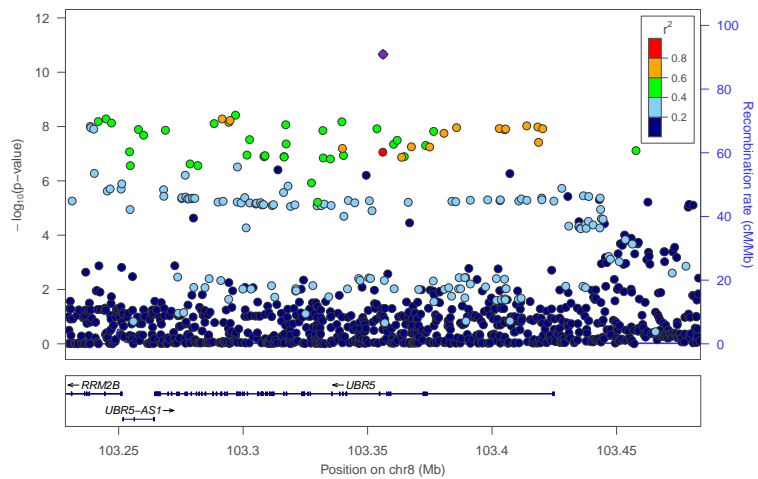

locus 297 8:104648730\_CCCTGGGA\_C

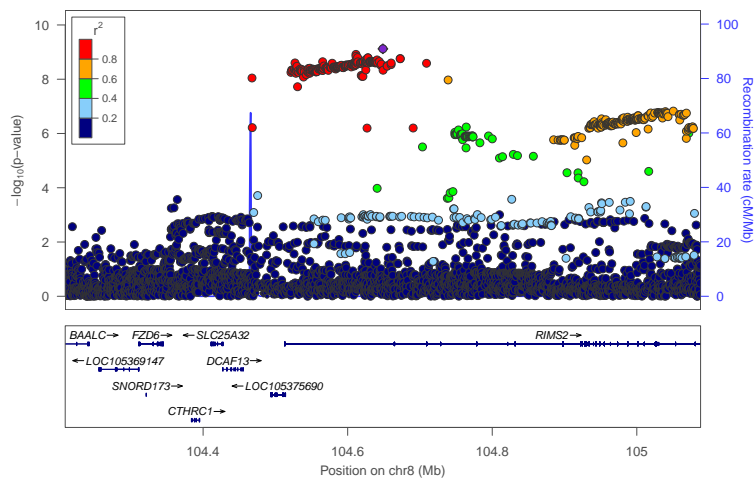

locus 298 rs776935

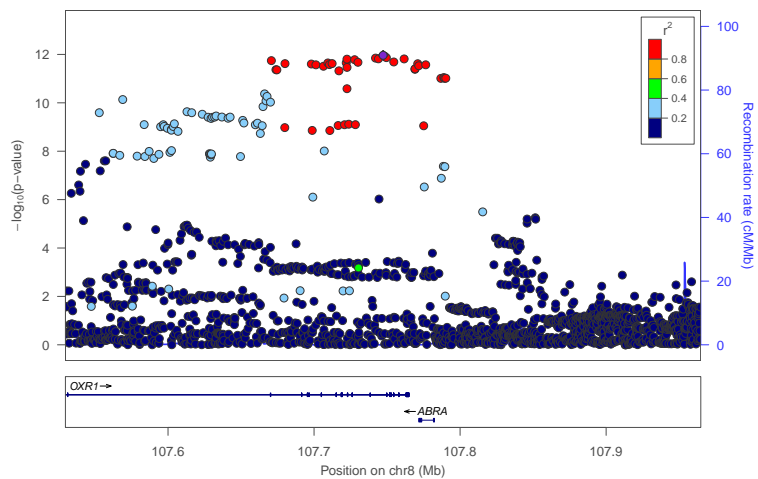

locus 299 rs1532797

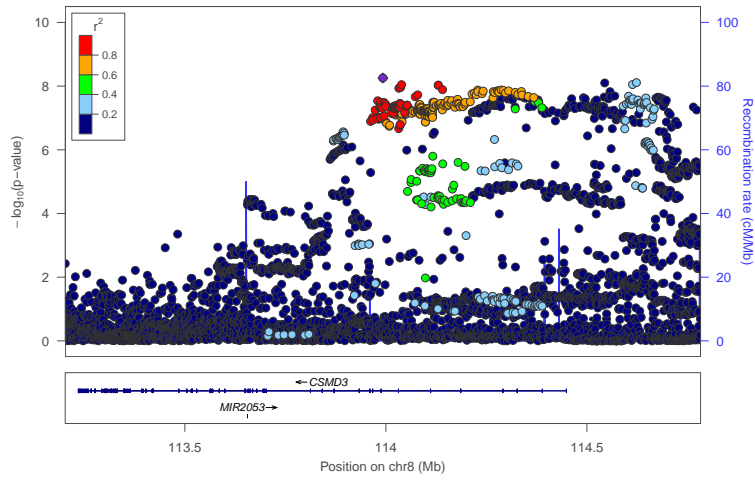

locus 300 rs62511348

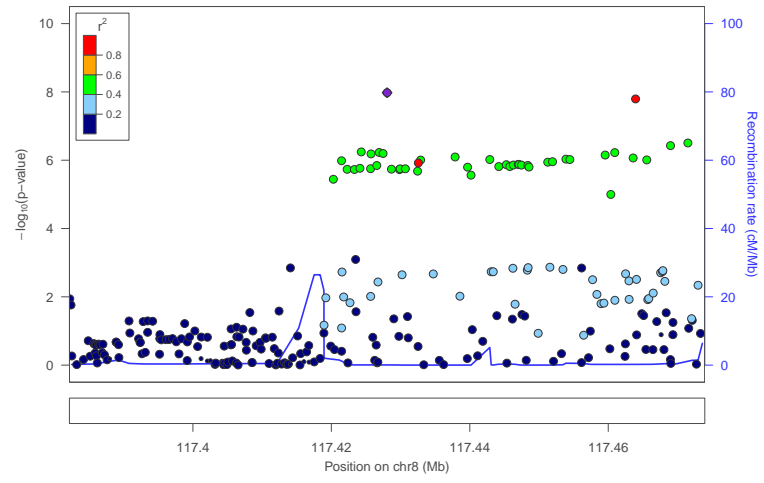

locus 301 rs6471065

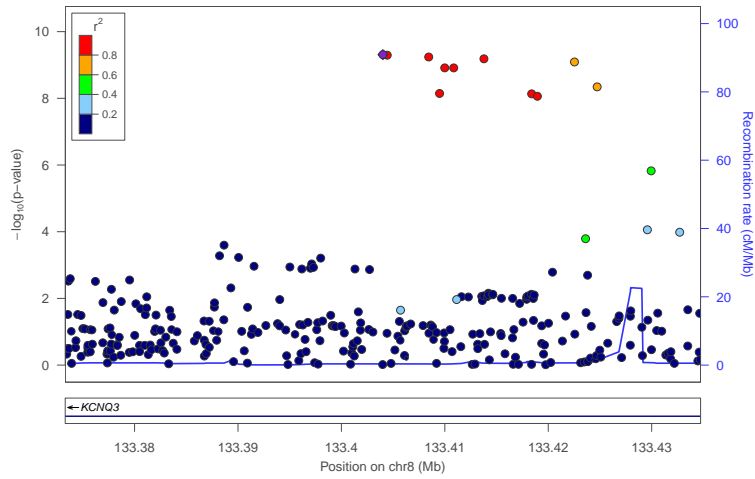

locus 302 rs2242090

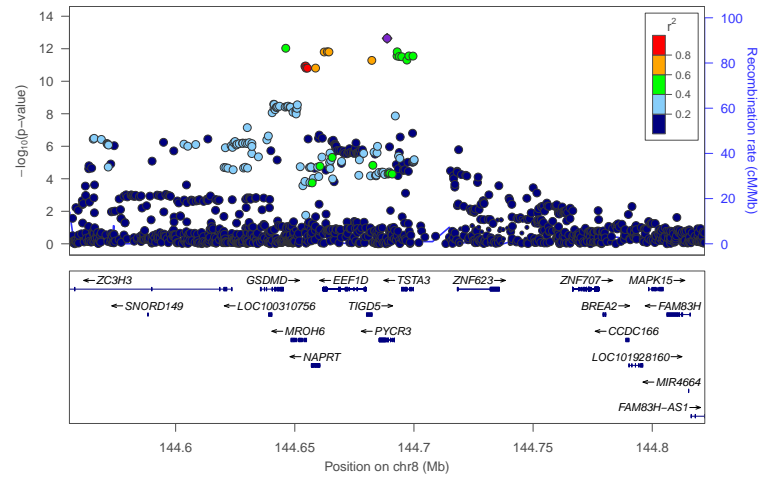

locus 303 rs17727688

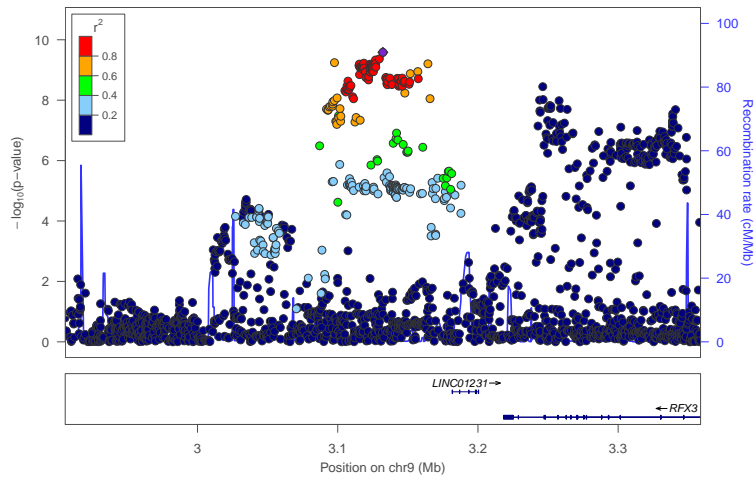

locus 304 rs10758594

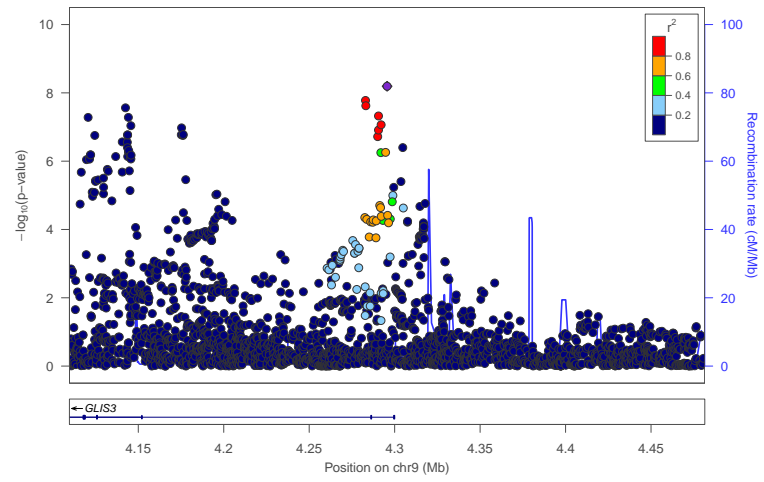

locus 305 rs7042696

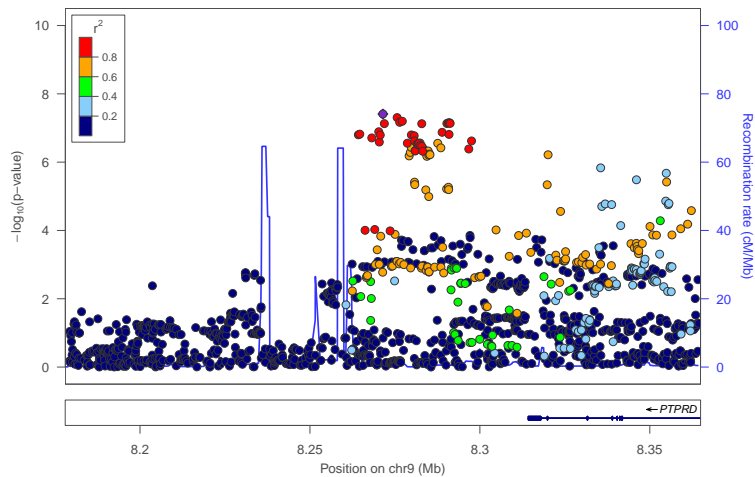

locus 306 rs118166957

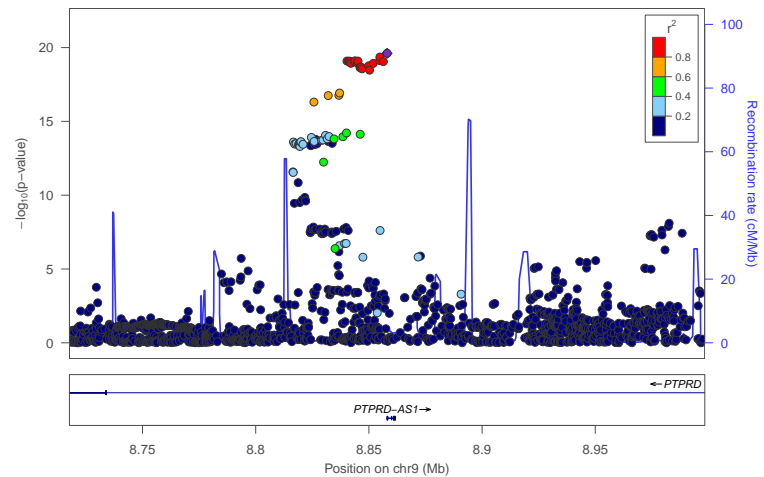

locus 307 rs1322304

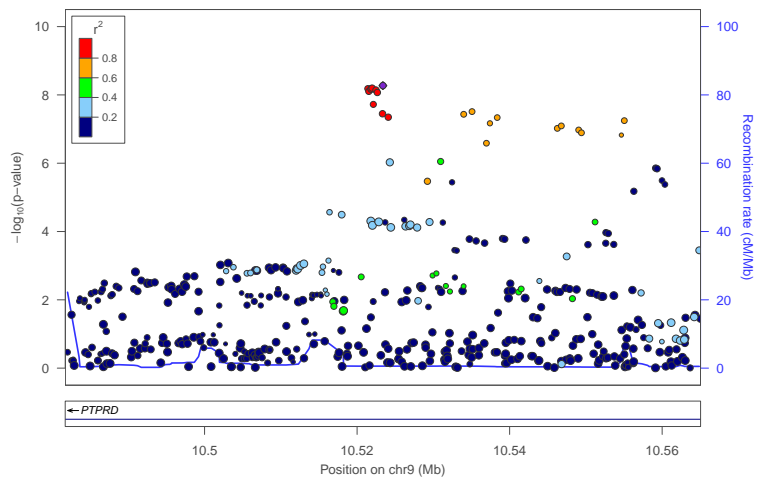

locus 308 rs2130121

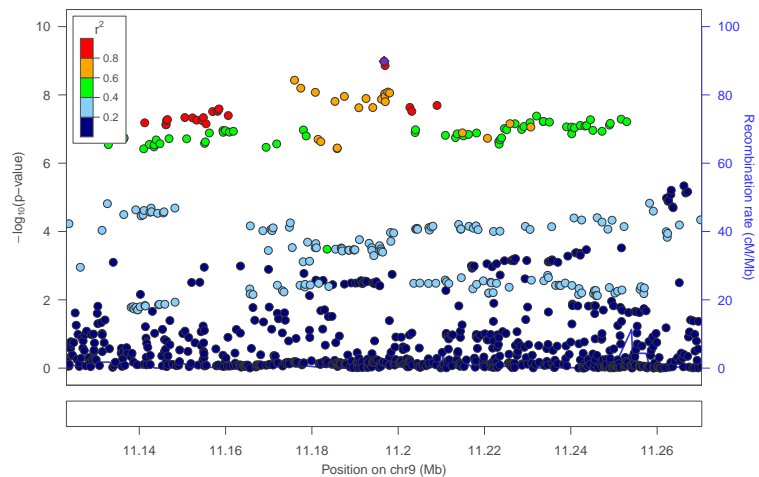

locus 309 rs10756553

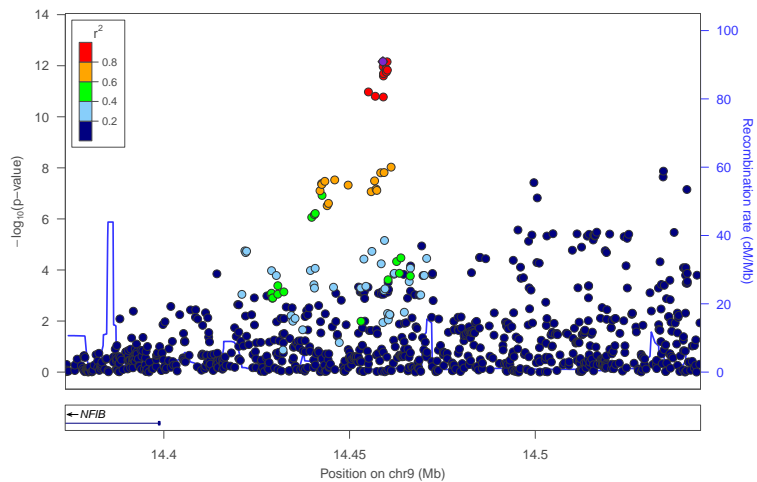

locus 310 rs393488

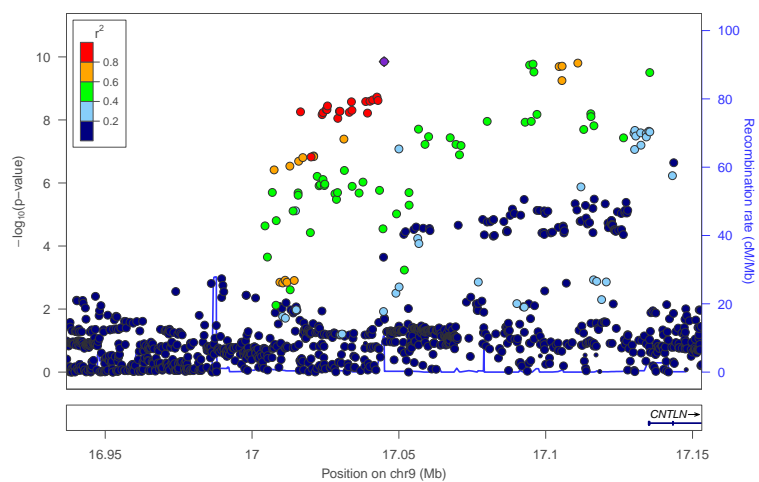

locus 311 rs7032599

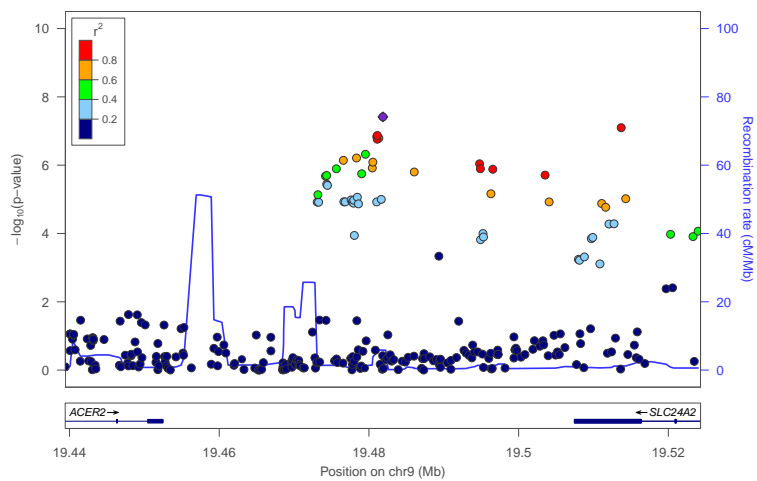

locus 312 rs55863203

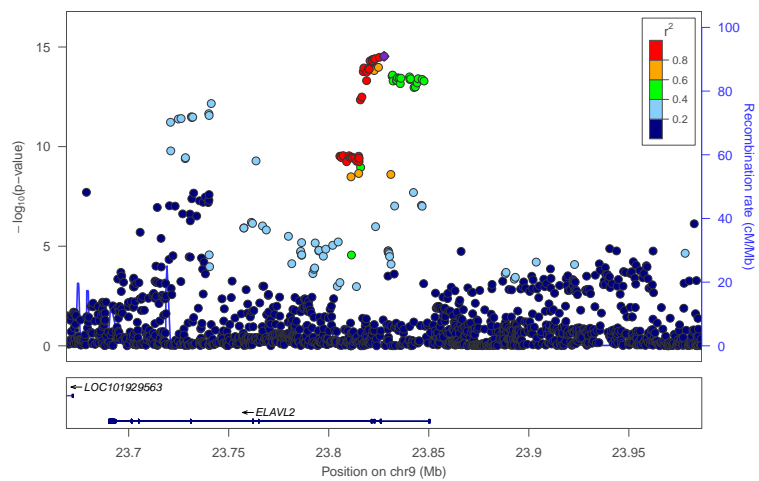

locus 313 rs3824345

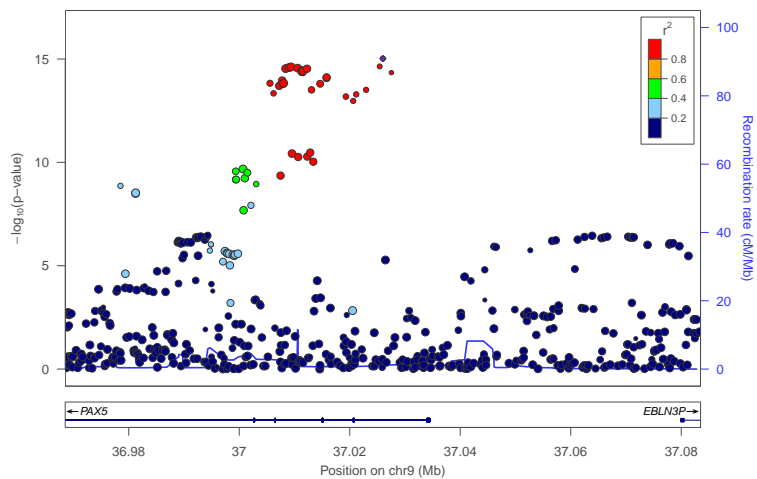

locus 314 rs9777373

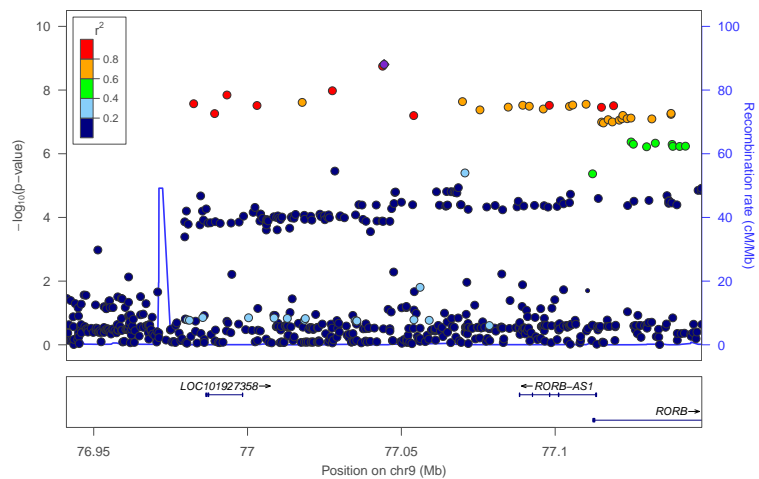

locus 315 rs990559

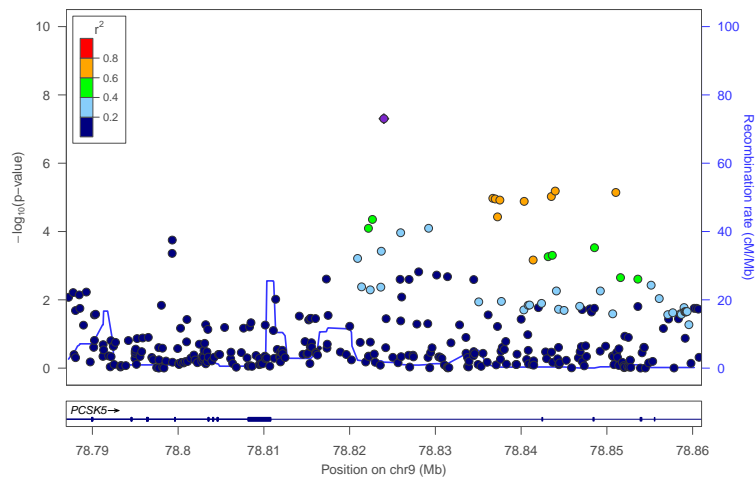

locus 316 rs35820496

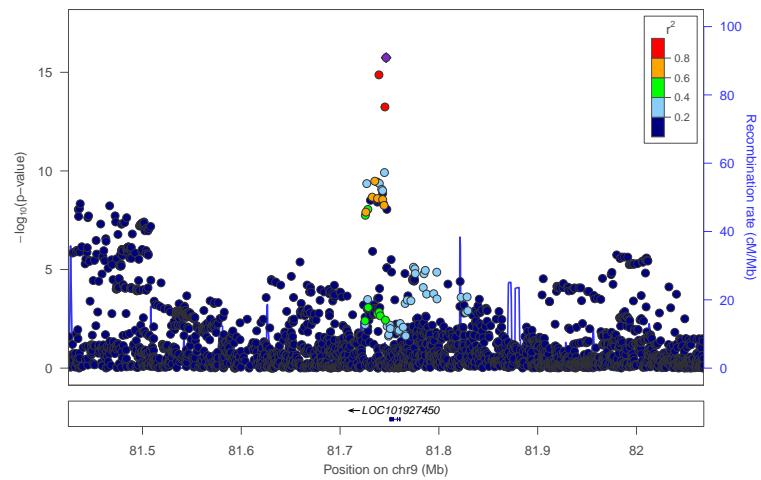

locus 317 rs1328435

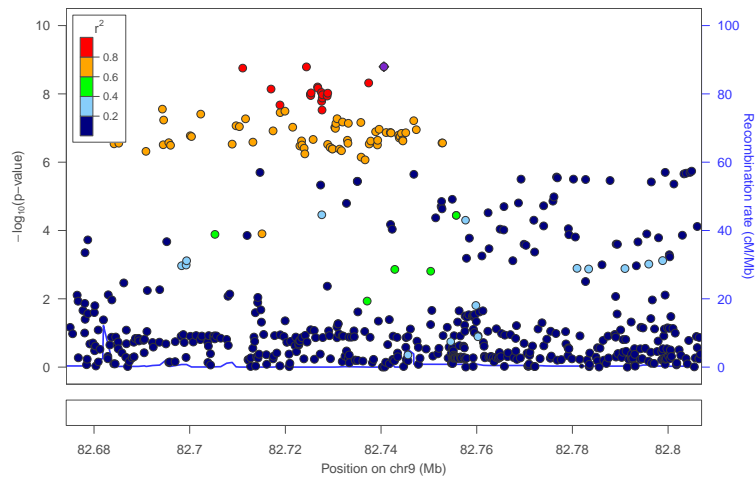

locus 318 rs10992756

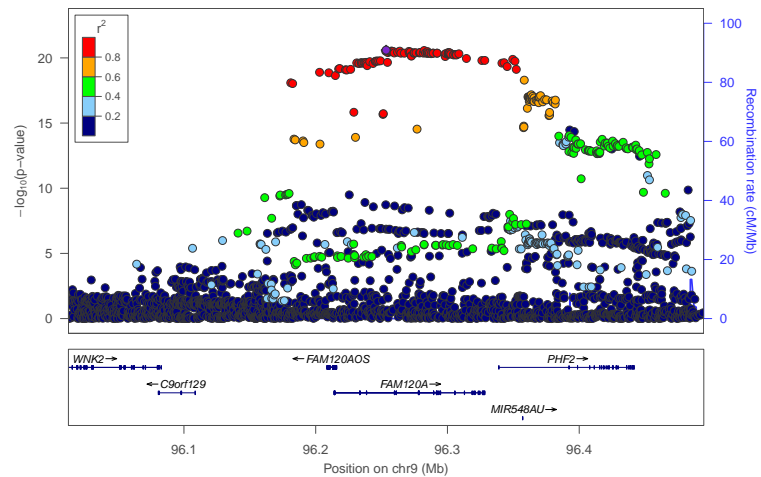

locus 319 rs7853585

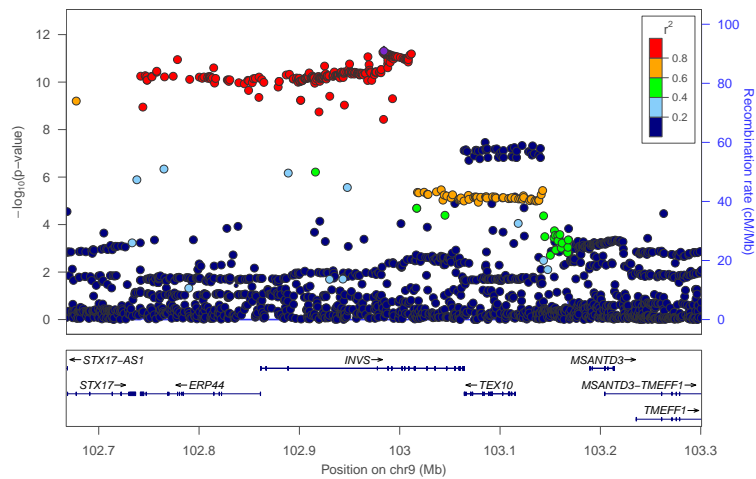

locus 320 rs10817718

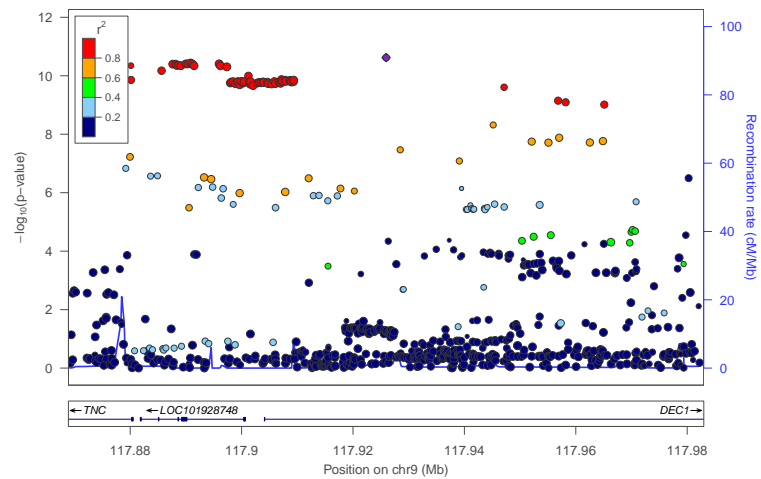

locus 321 rs4595203

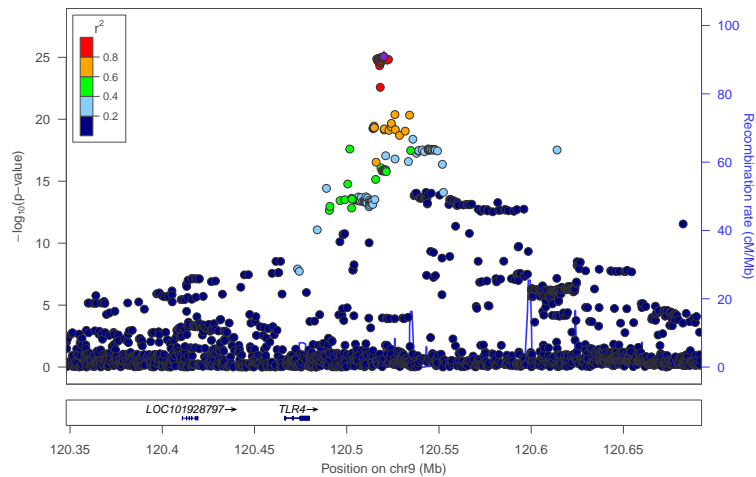

locus 322 rs10818399

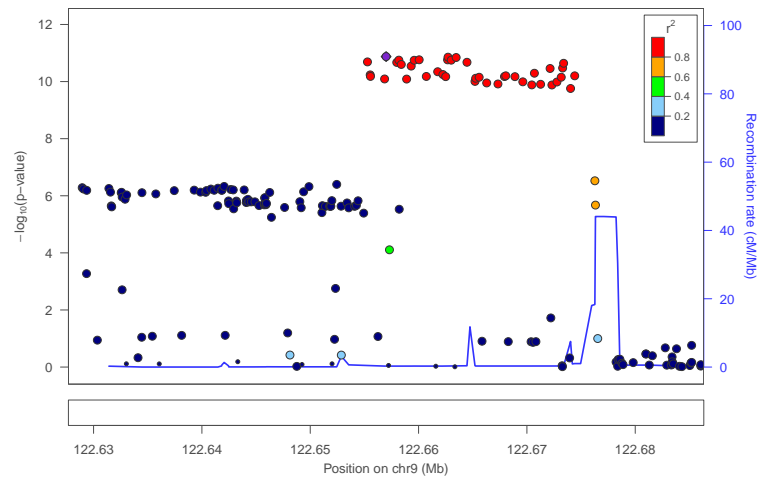



locus 323 rs2792990

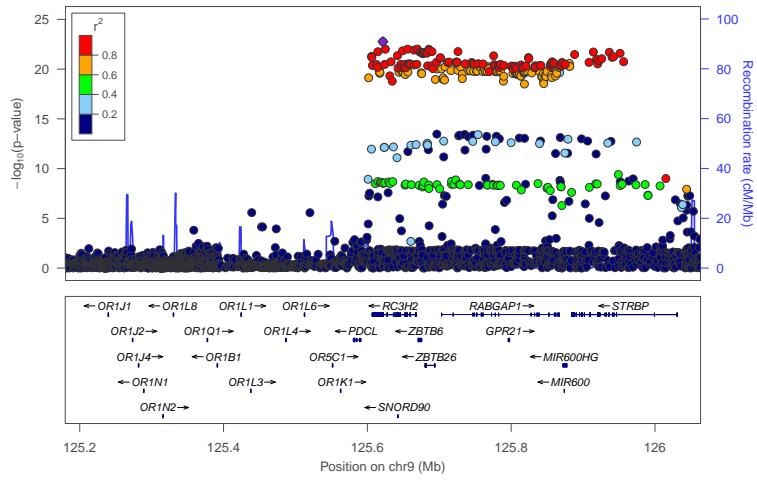

locus 324 rs2502817

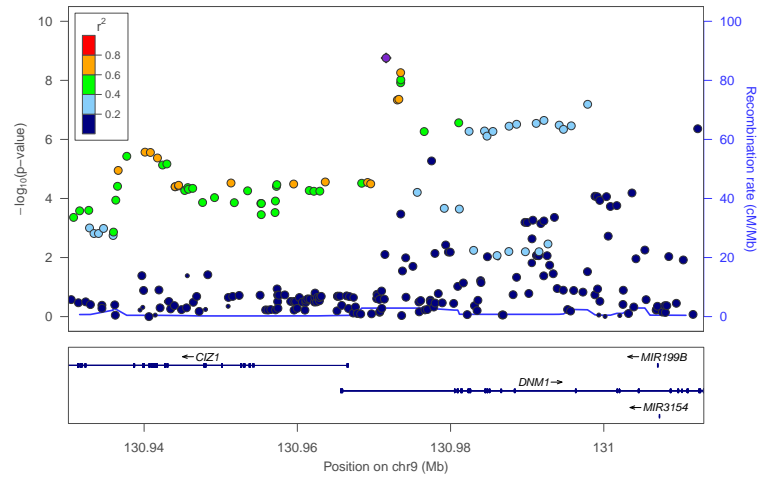

locus 325 rs10819613

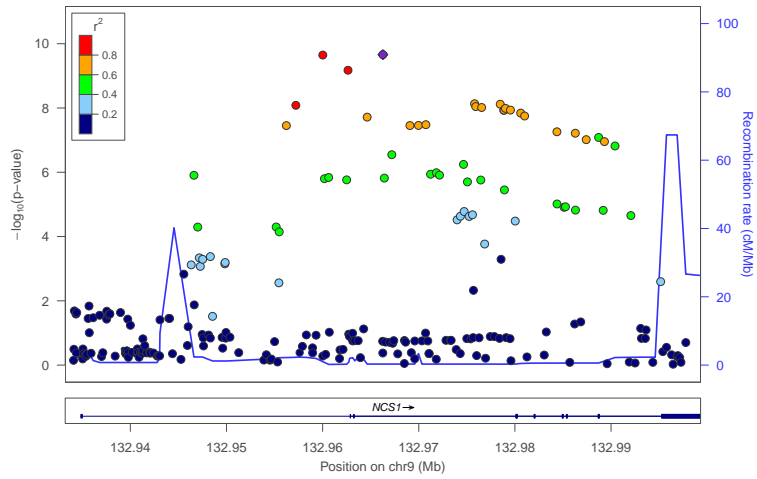

locus 326 rs10125388

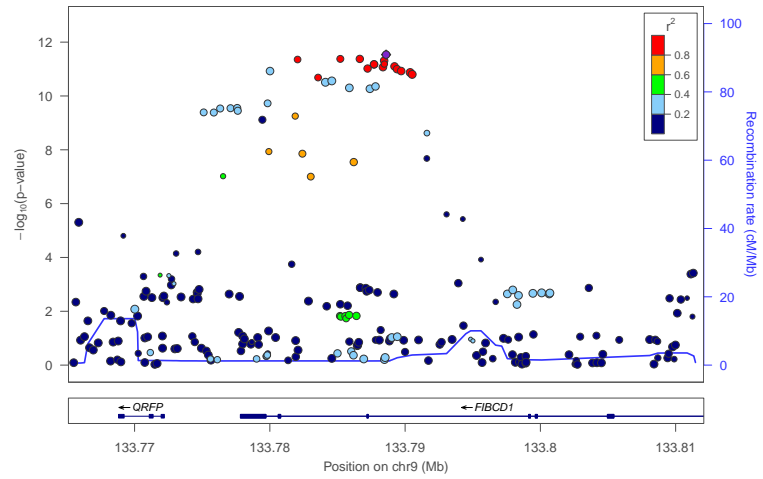

locus 327 rs9411339

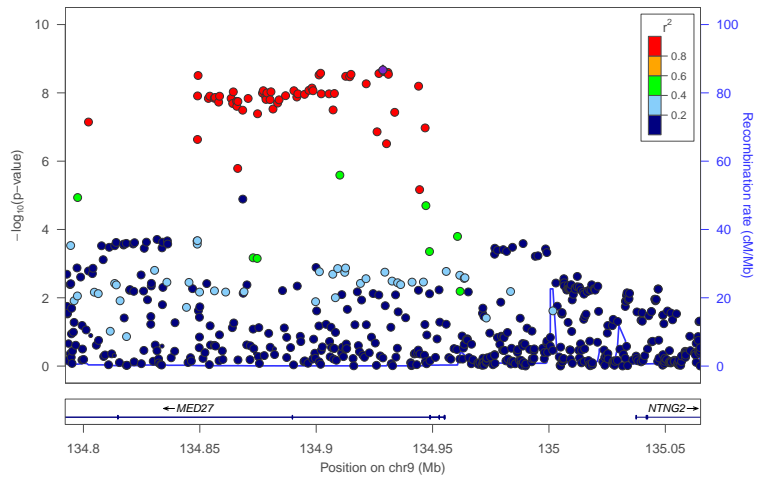

locus 328 rs72766657

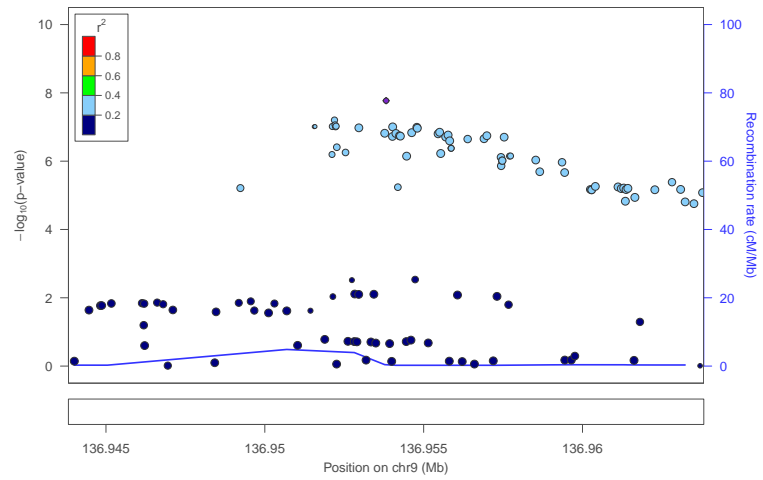

locus 329 rs1105175

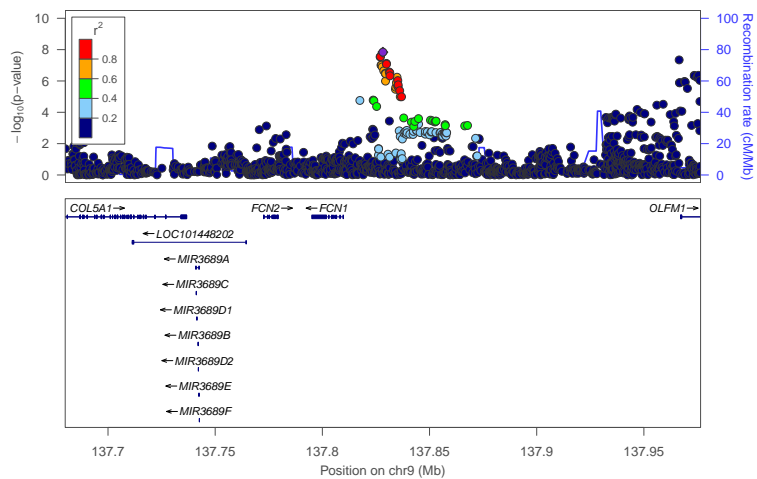

locus 330 rs12684650

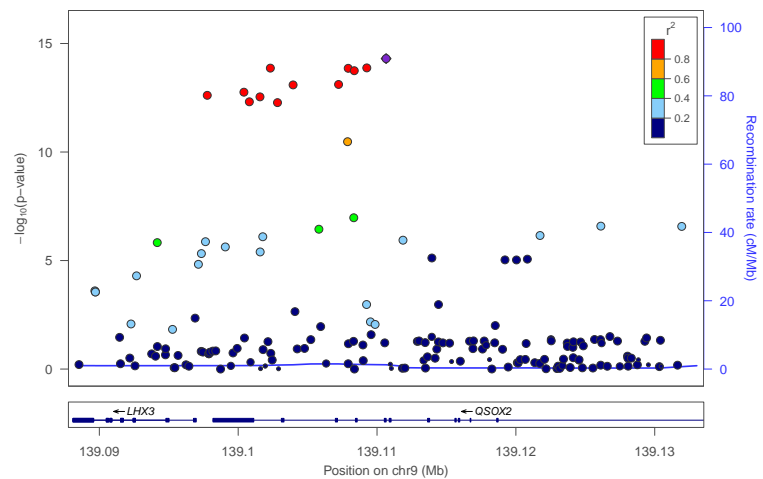

locus 331 9:140265782\_C\_T

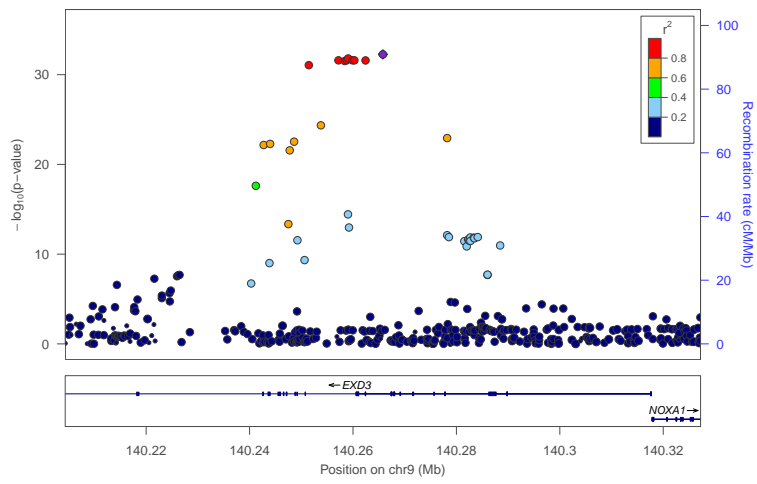

locus 332 rs12775090

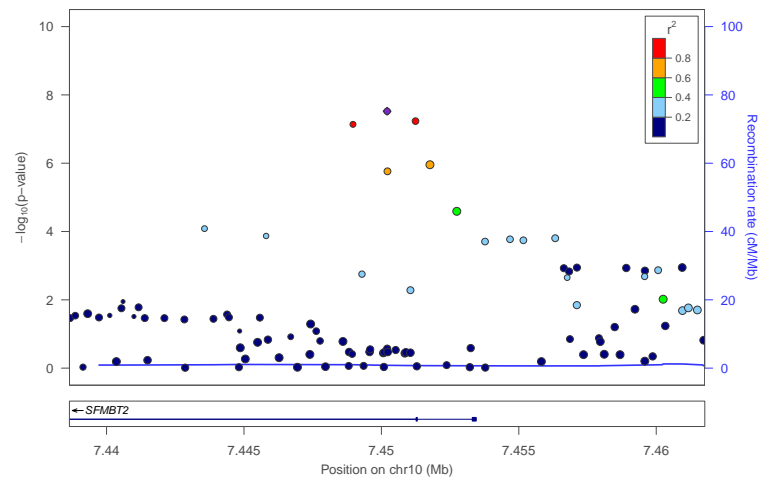

locus 333 rs10906391

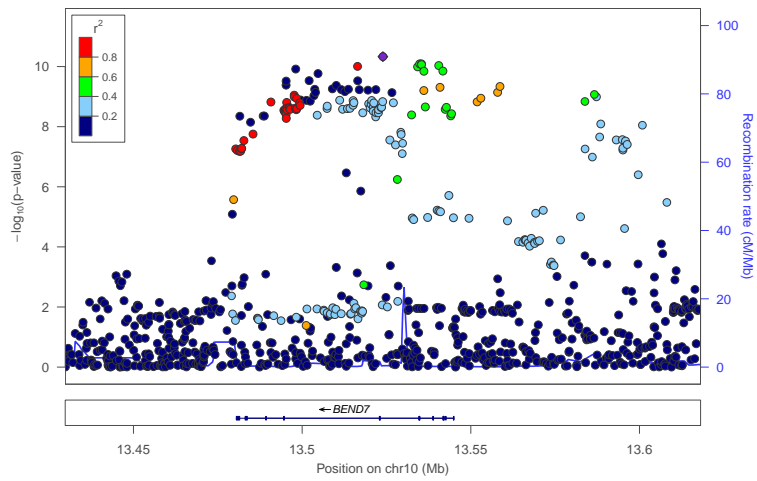

locus 334 rs1416901

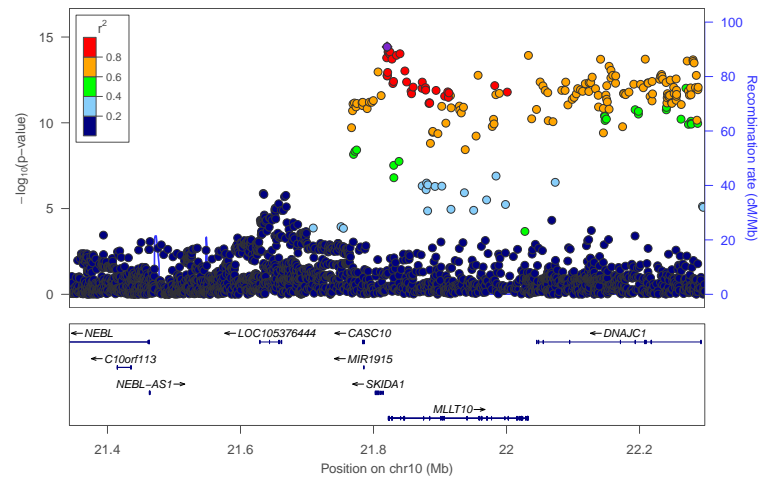

locus 335 rs9943377

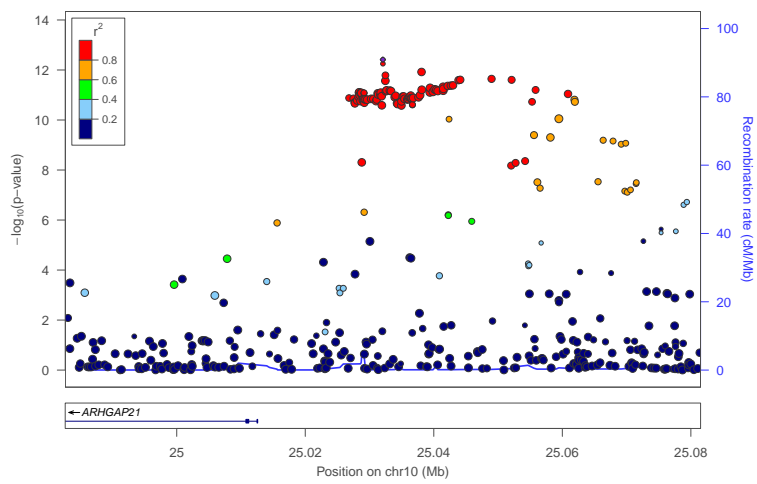

locus 336 rs117404983

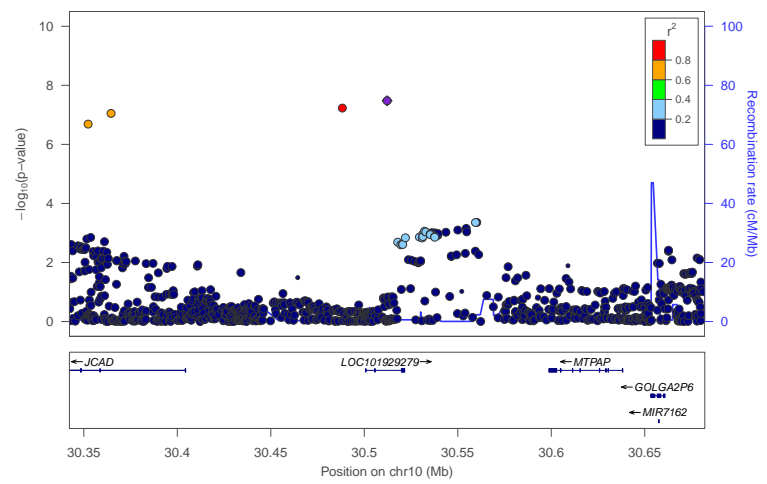

locus 337 rs12356643

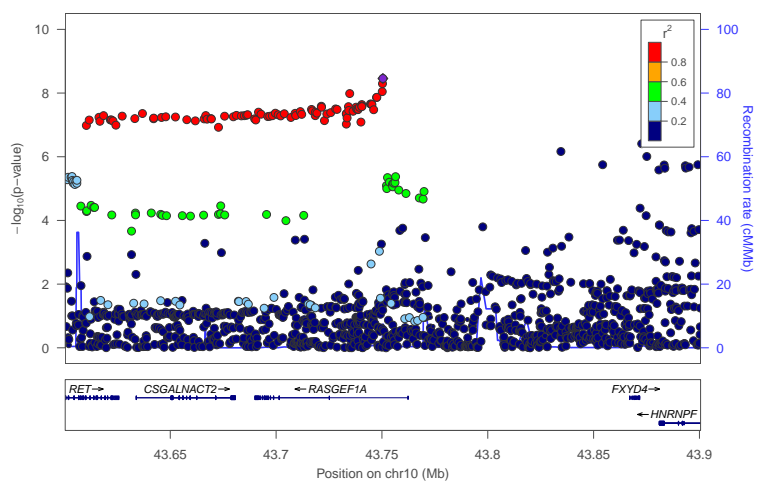

locus 338 rs11004838

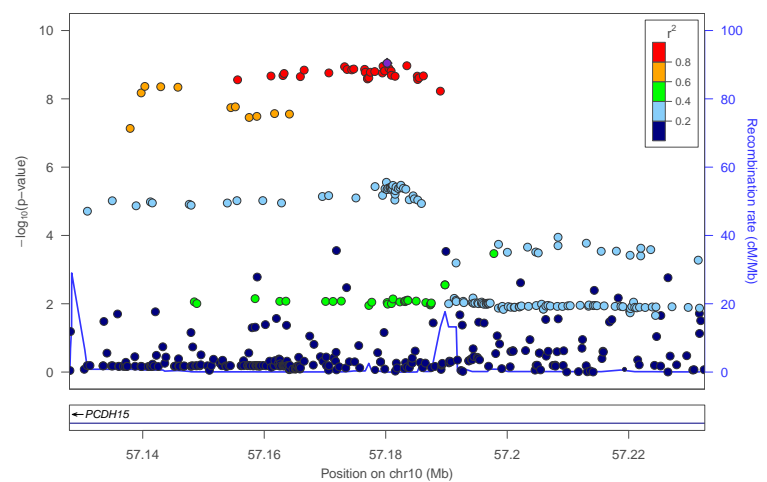

locus 339 rs224139

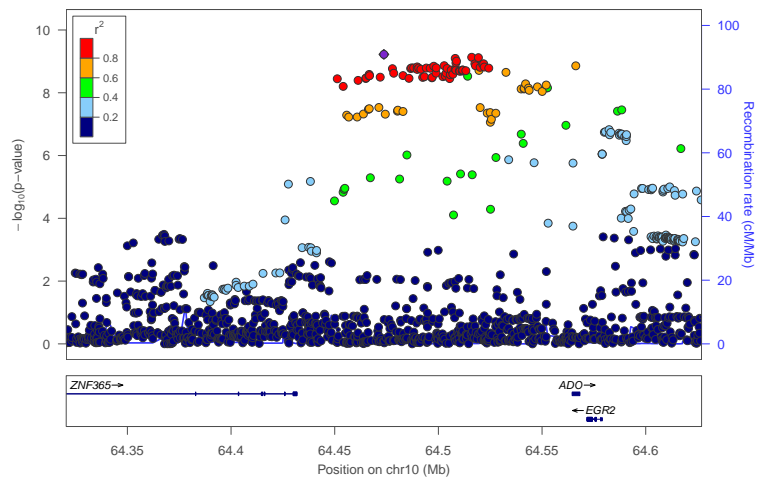

locus 340 rs7924036

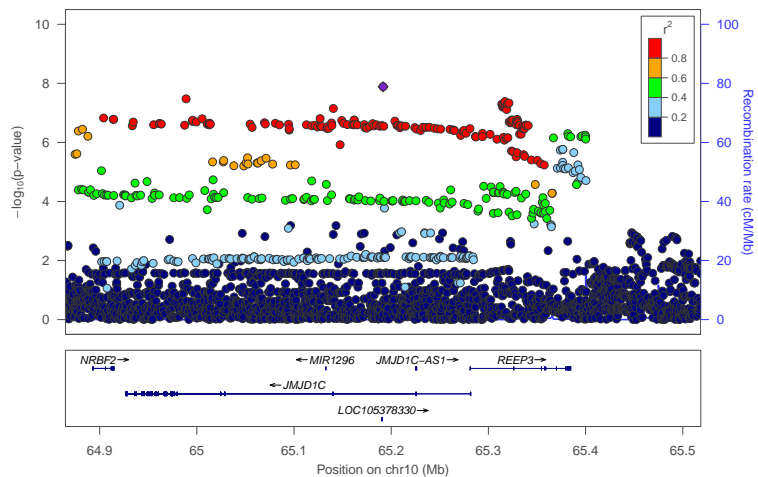

locus 341 rs7072222

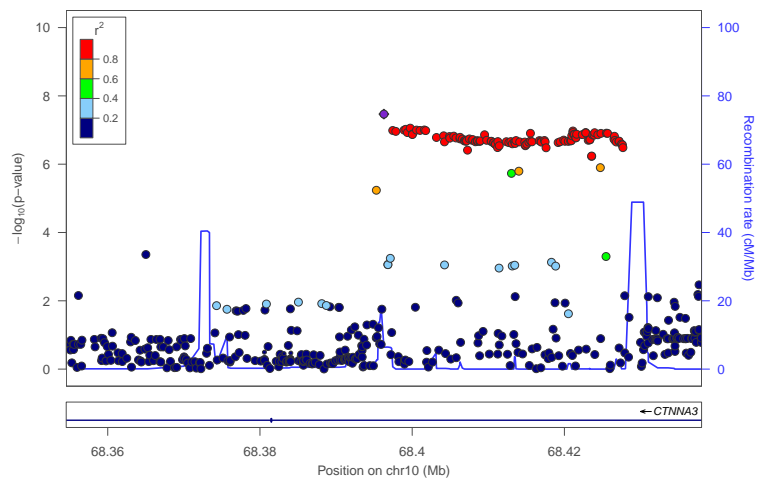

locus 342 rs111296206

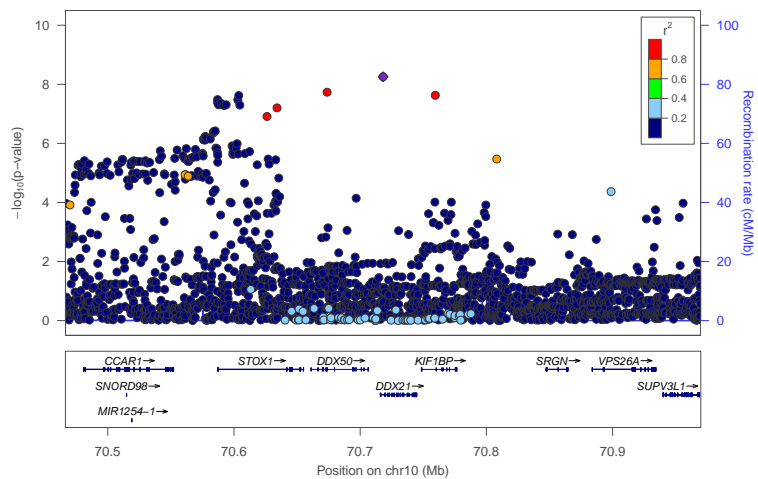

locus 343 rs2395137

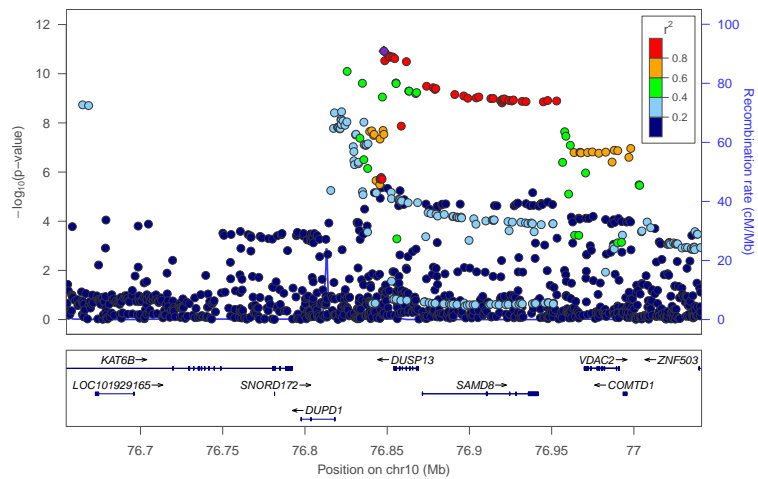

locus 344 rs1407736

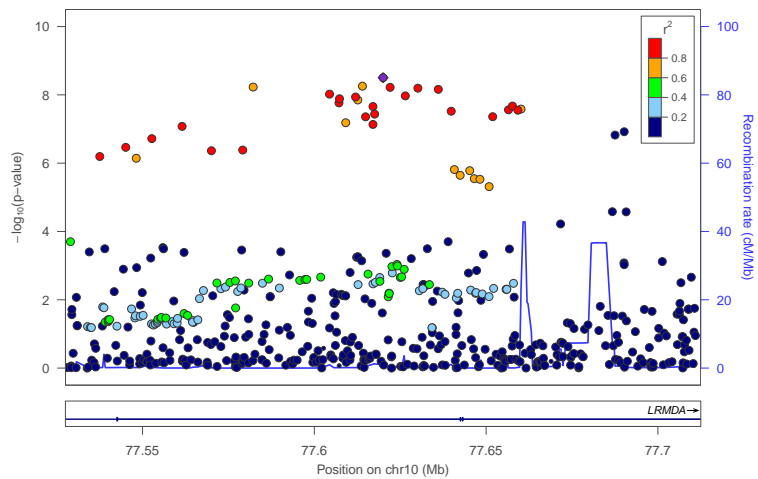

locus 345 rs566903

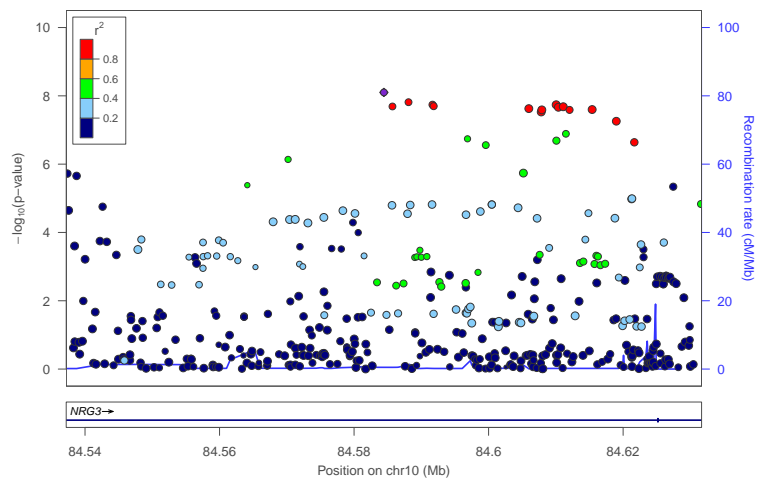

locus 346 rs188189626

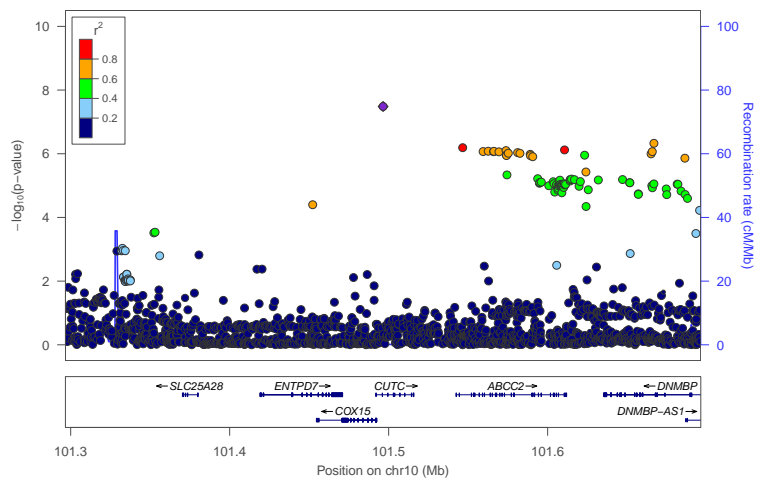

locus 347 rs111374164

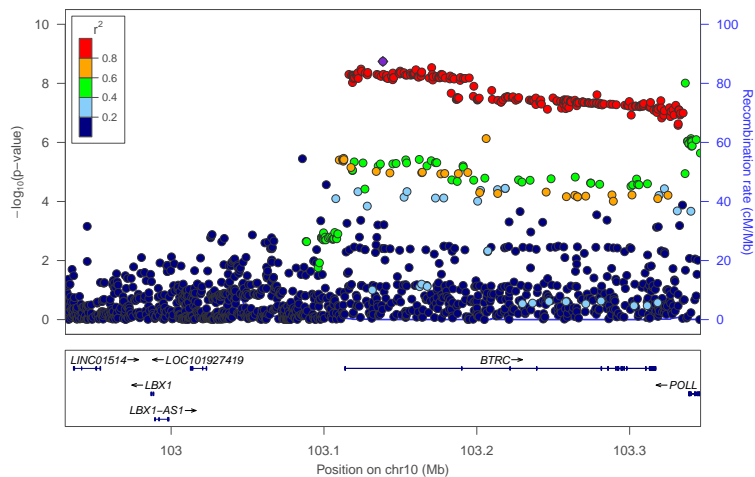

locus 348 rs11191434

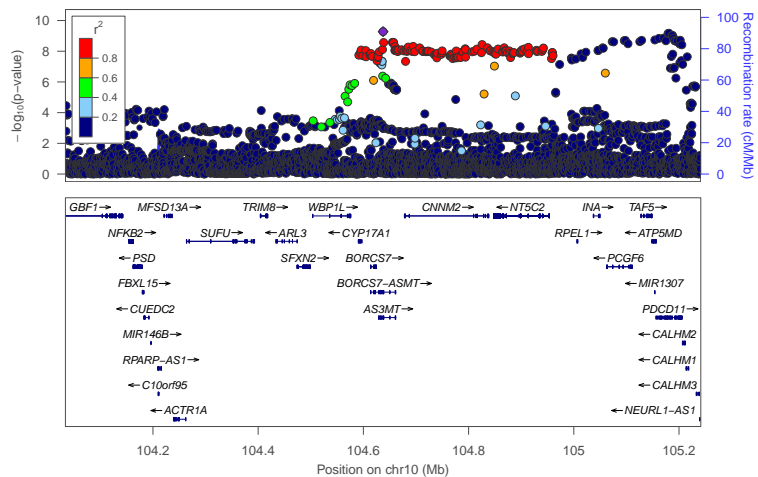

locus 349 rs56093138

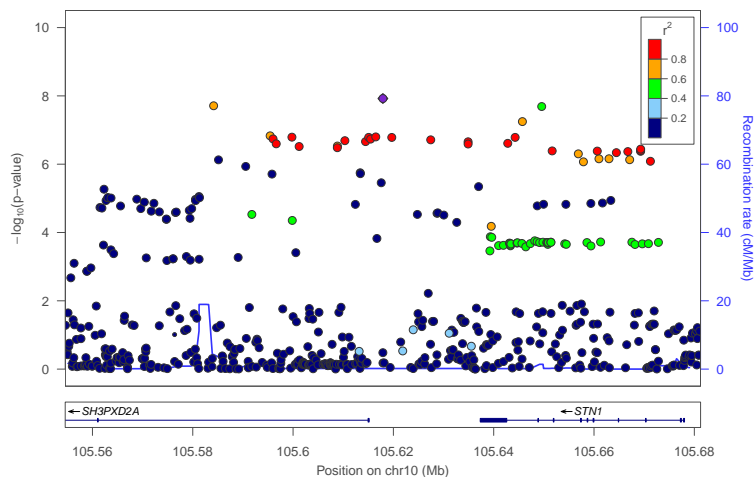

locus 350 rs35723963

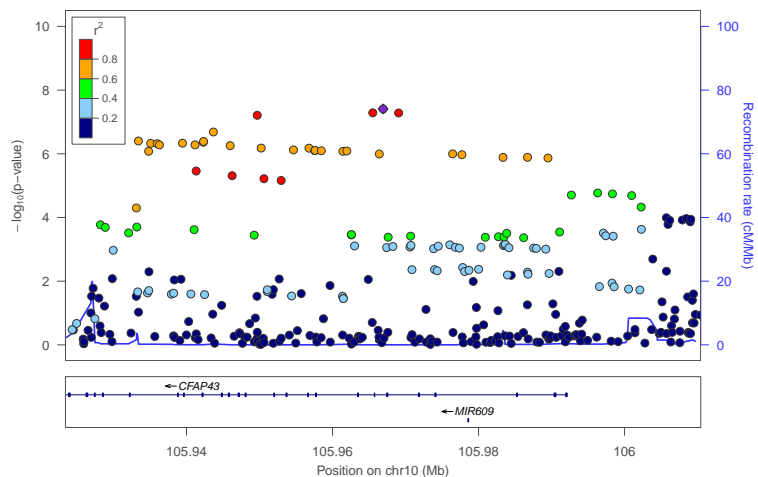

locus 351 rs9787523

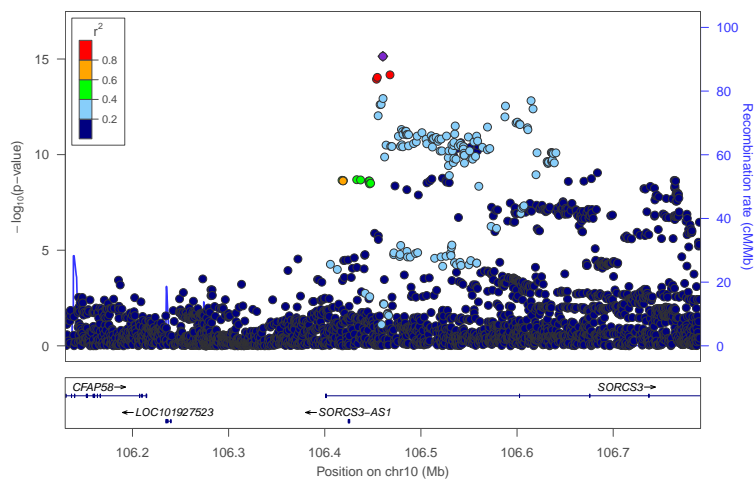

locus 352 rs1331156

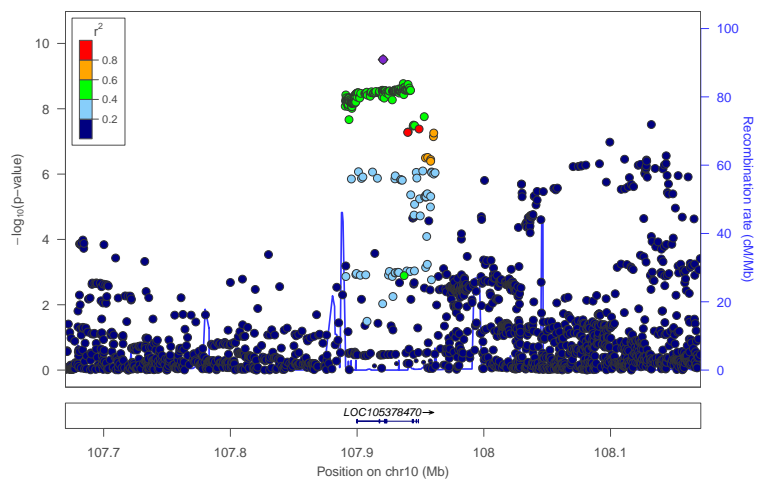

locus 353 rs2184796

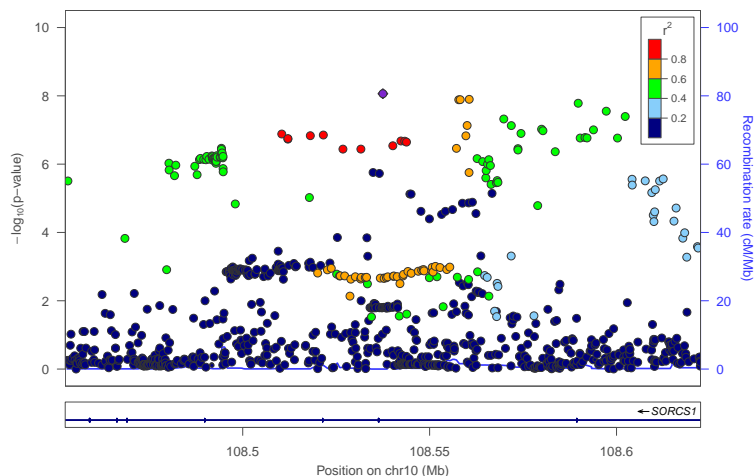

locus 354 rs72814942

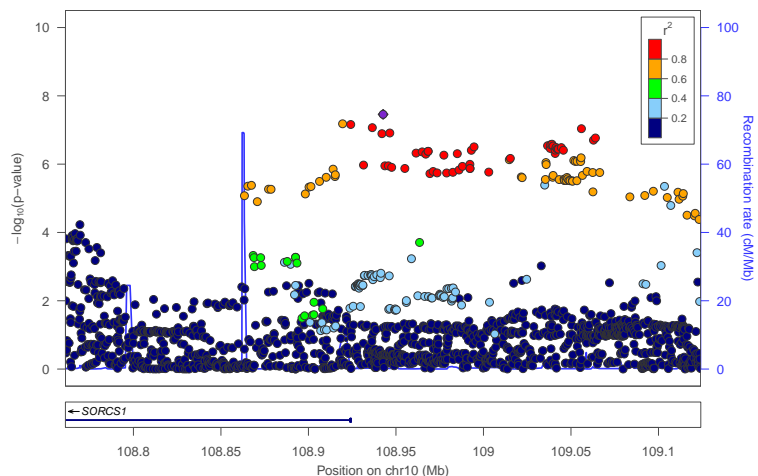



locus 355 rs17130183

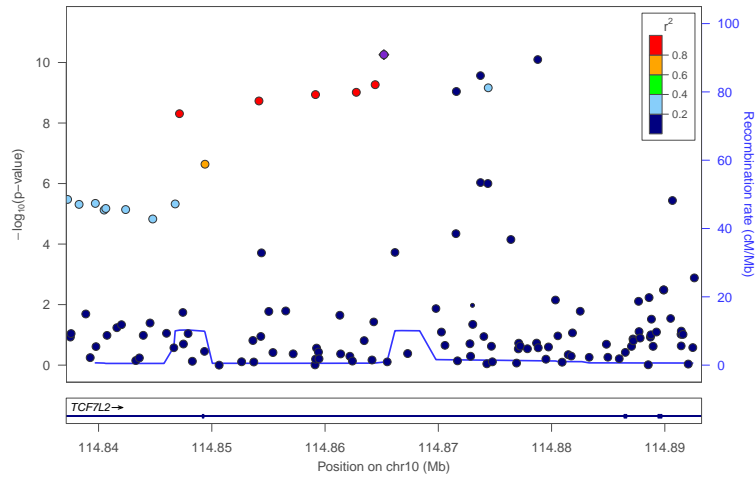

locus 356 rs7915425

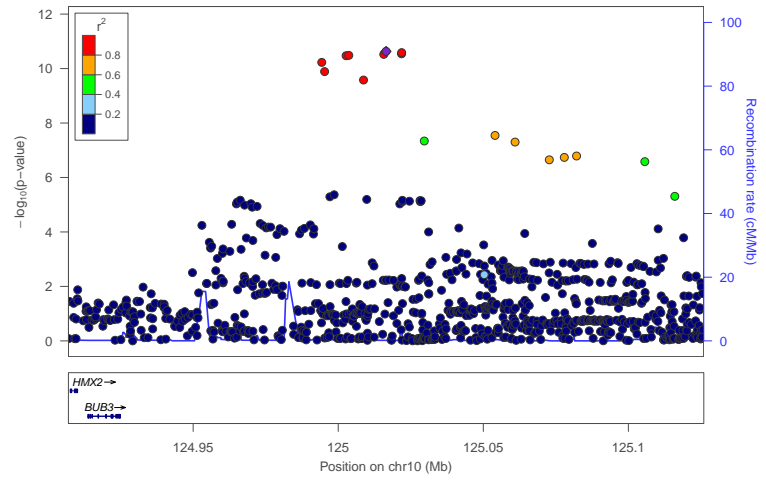

locus 357 rs2065677

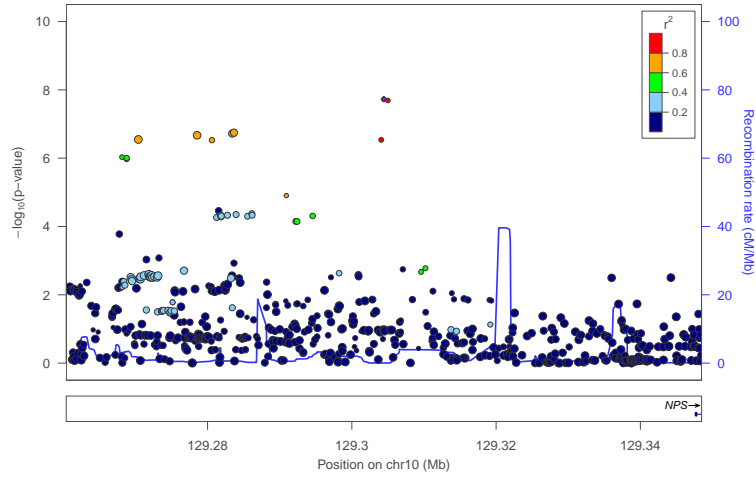

locus 358 rs9971199

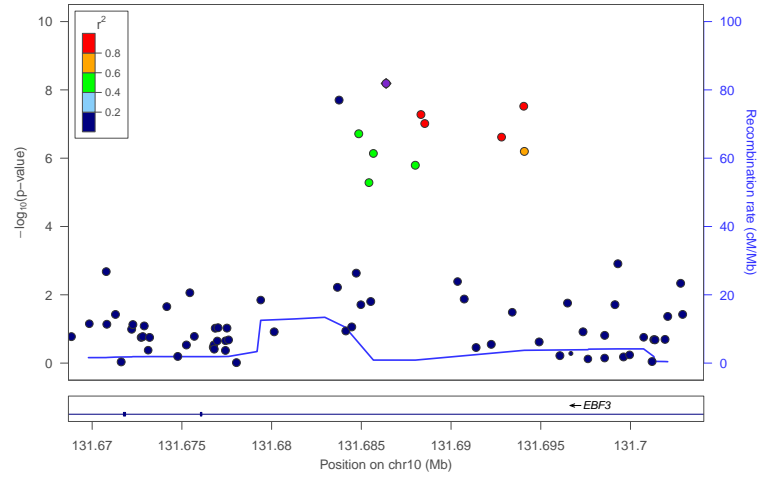

locus 359 rs2748432

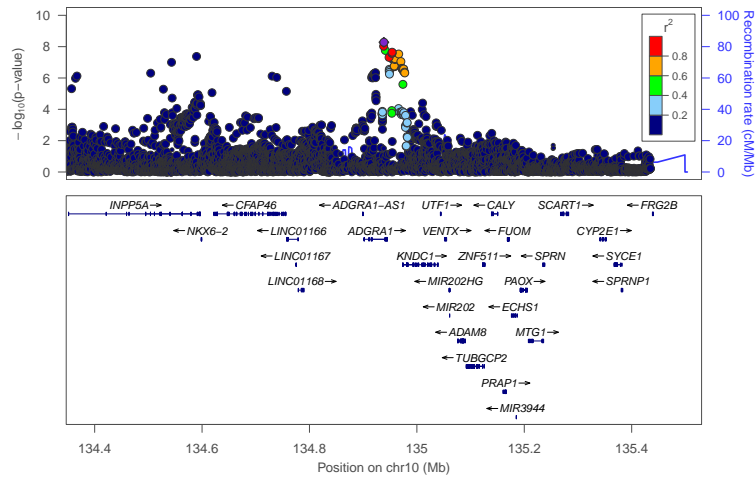

locus 360 rs1552514

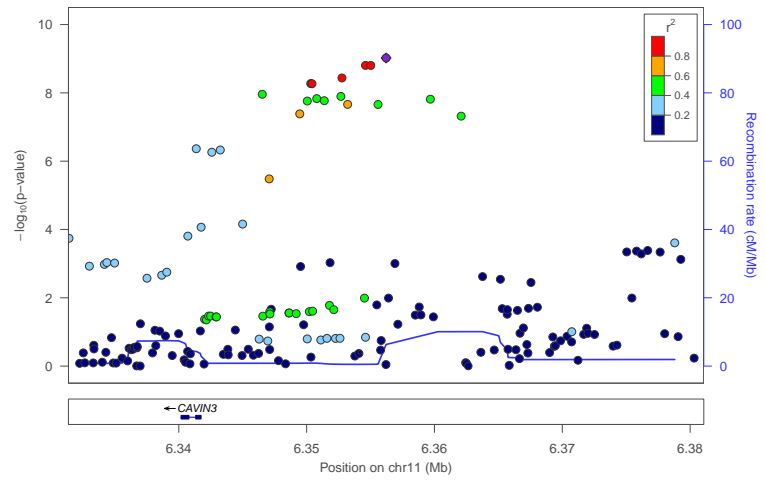

locus 361 rs7928823

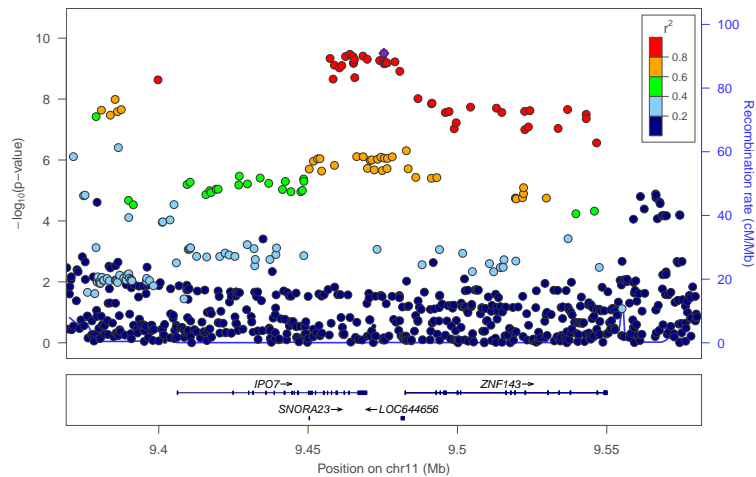

locus 362 rs75742406

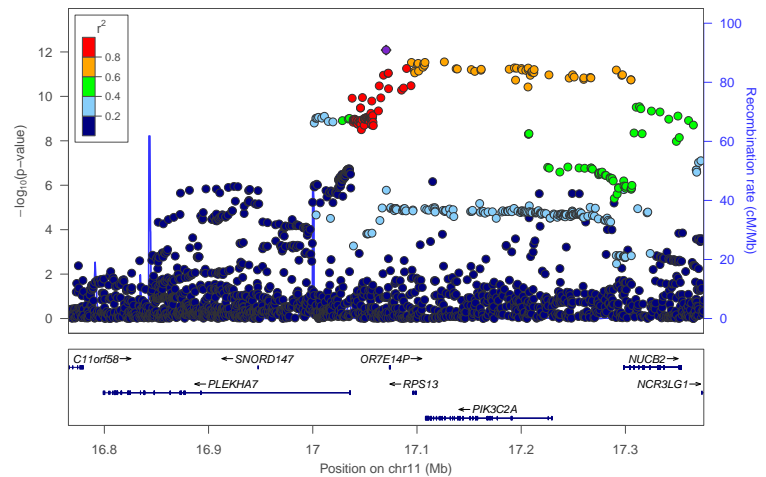

locus 363 rs593839

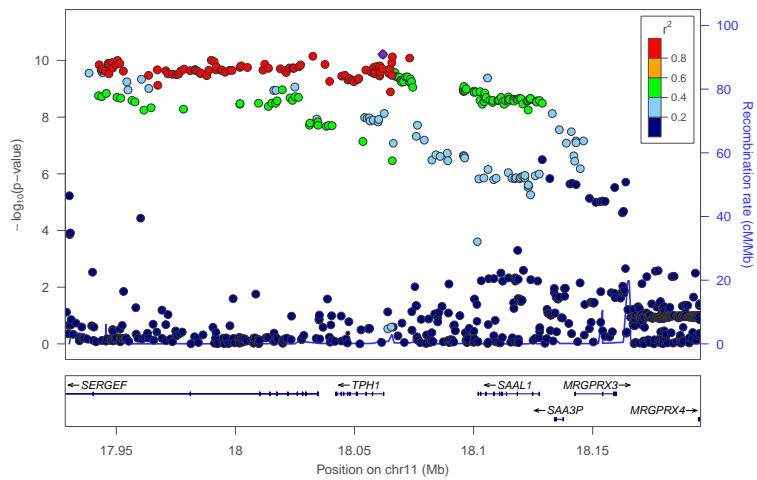

locus 364 rs12284708

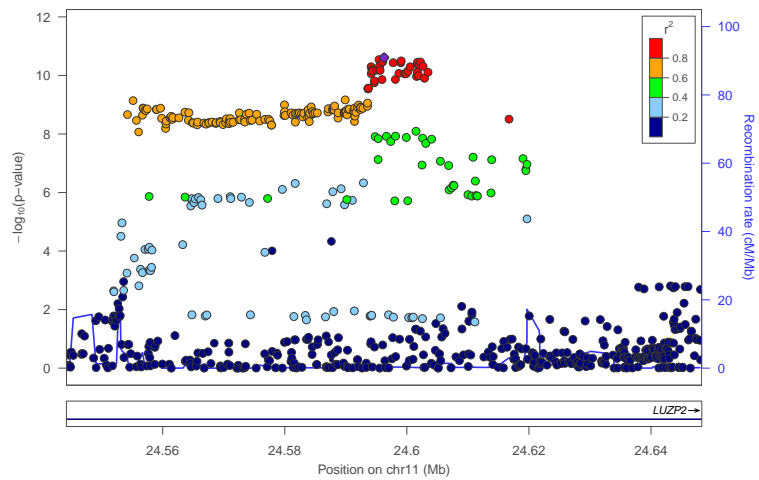

locus 365 rs1806152

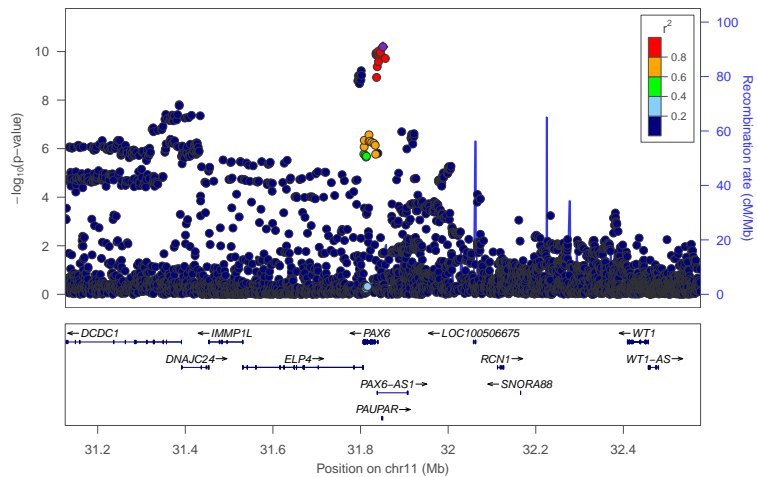

locus 366 rs10837042

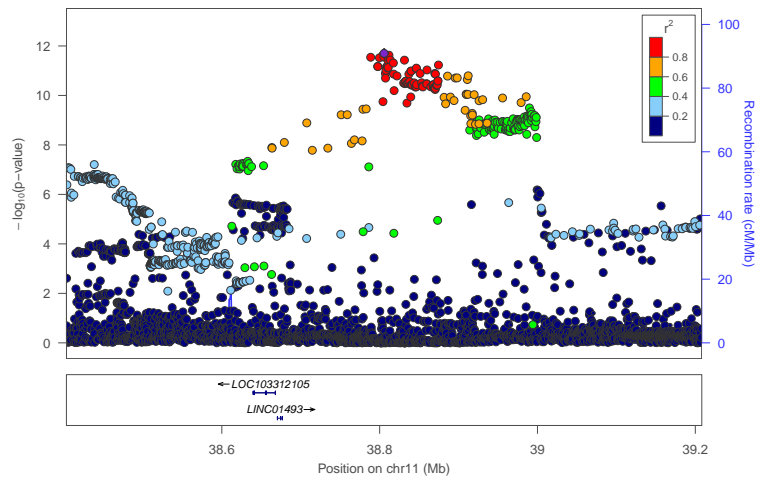

locus 367 rs72899452

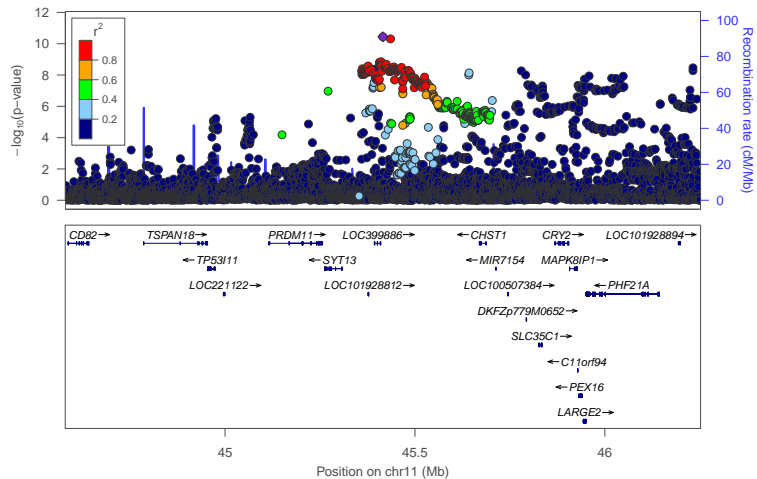

locus 368 rs150870784

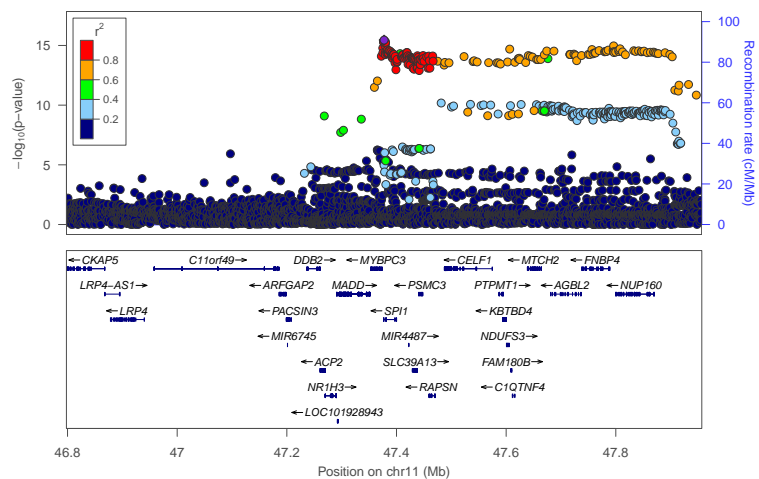

locus 369 rs7934304

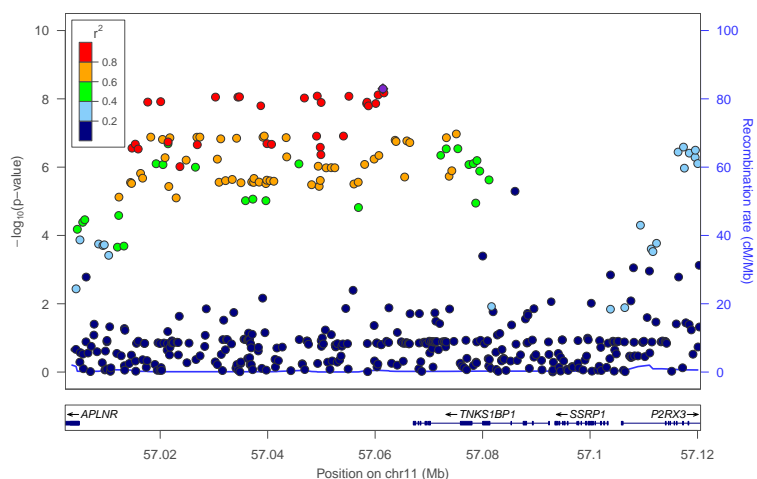

locus 370 rs12790660

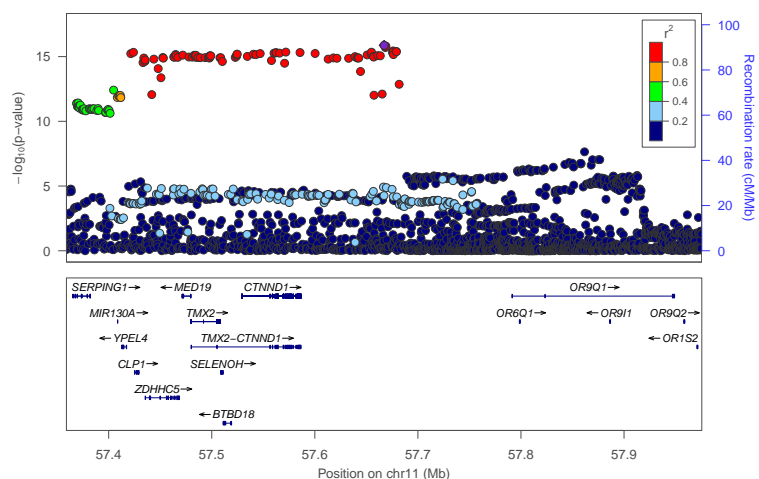

locus 371 rs7940070

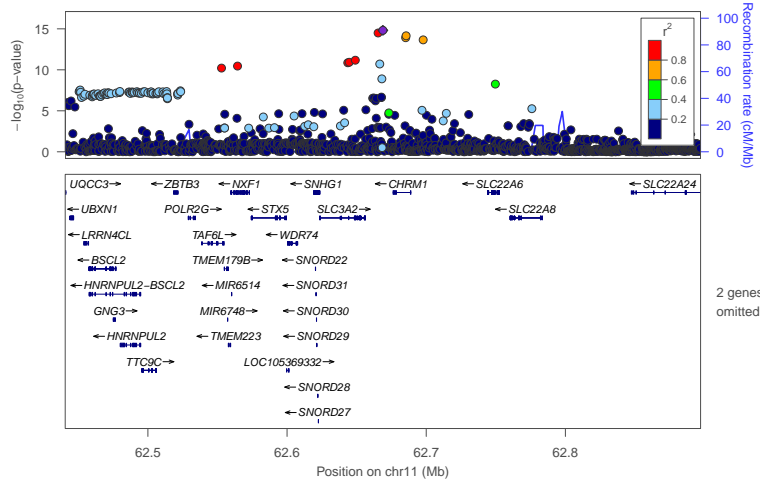

locus 372 rs12272545

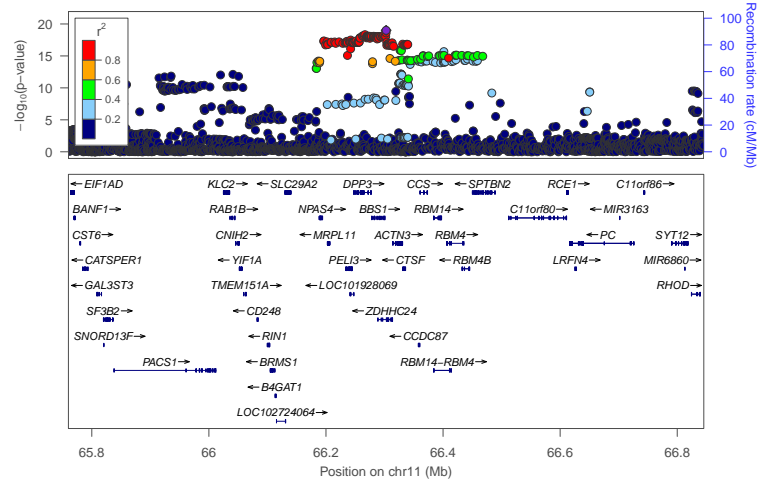

locus 373 rs79693059

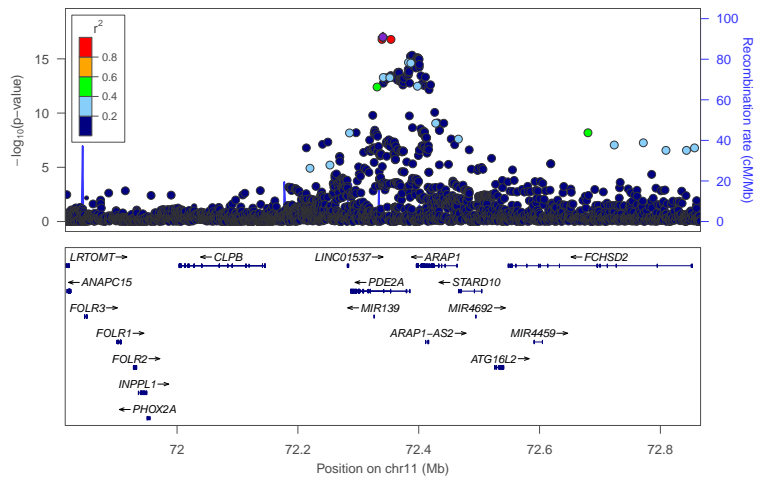

locus 374 rs505621

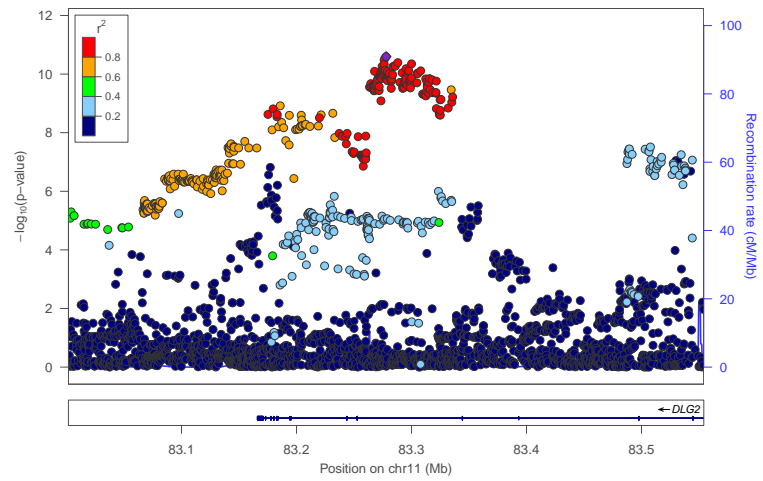

locus 375 rs519778

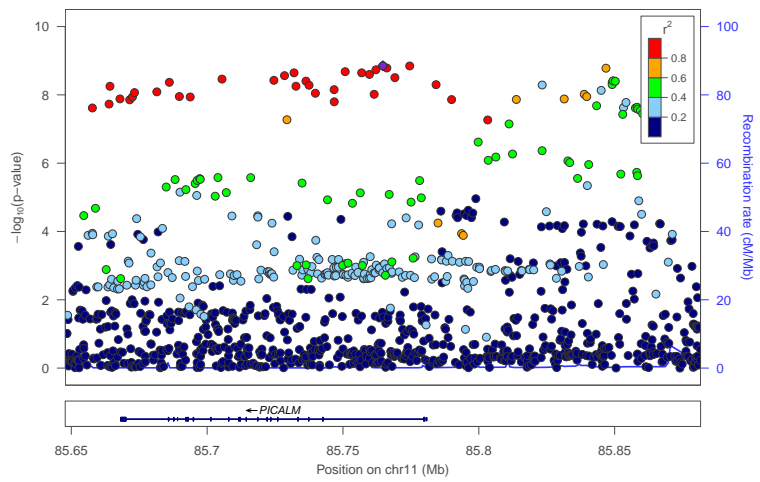

locus 376 rs1939252

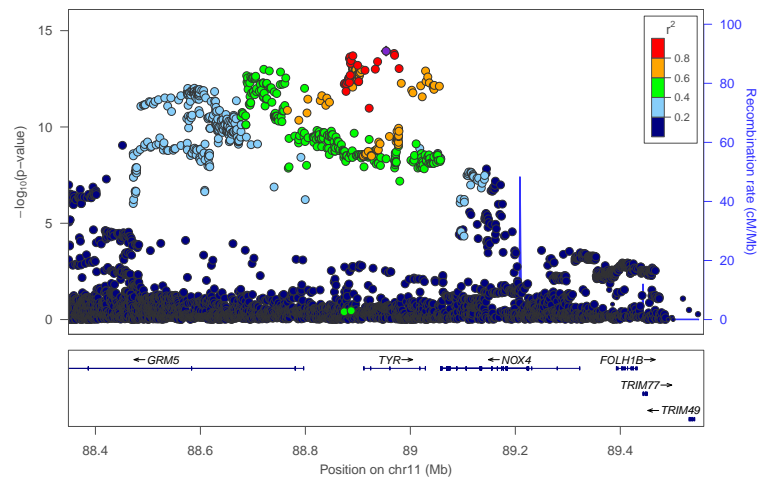

locus 377 rs10893052

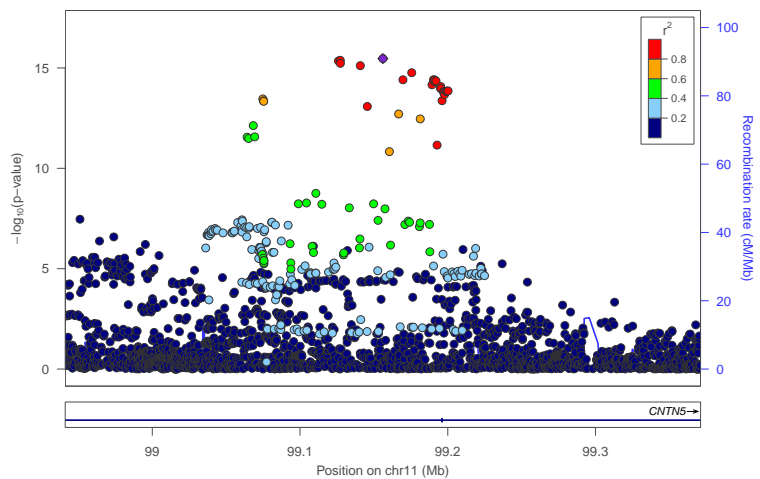

locus 378 rs7110574

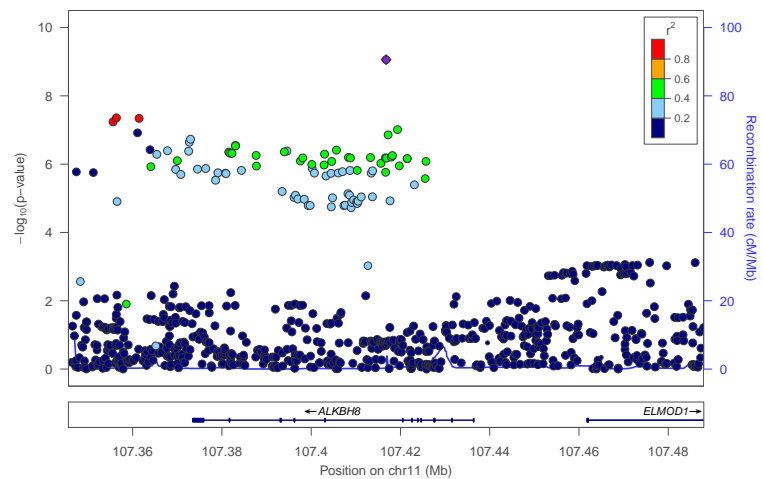

locus 379 rs3802847

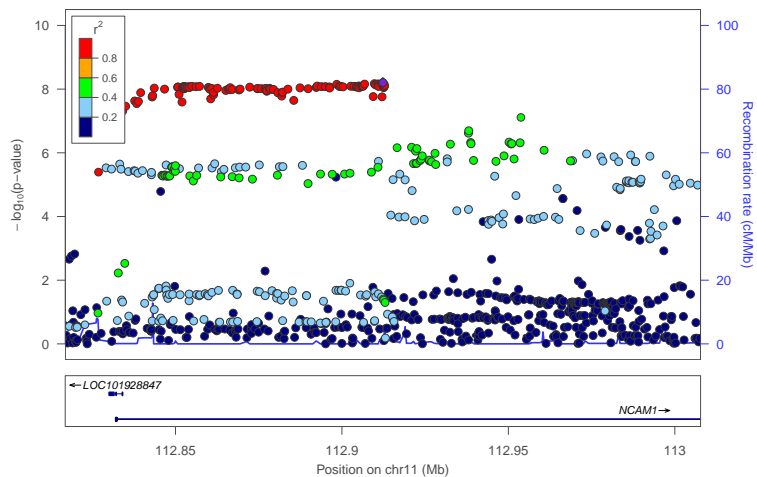

locus 380 rs1064939

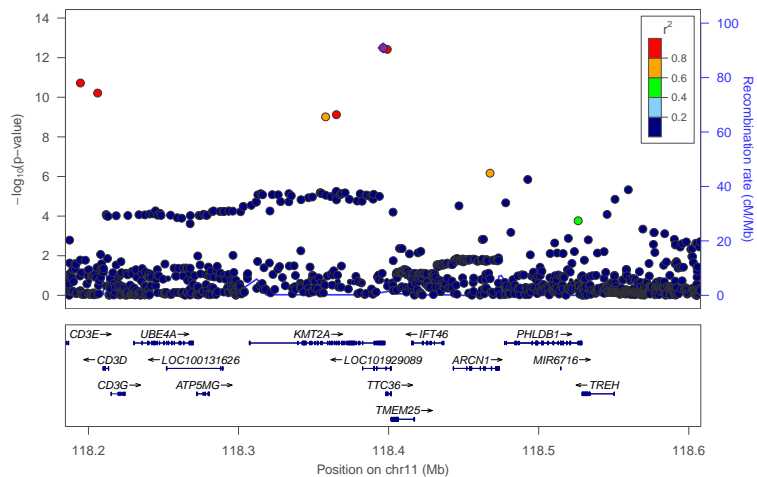

locus 381 rs142192979

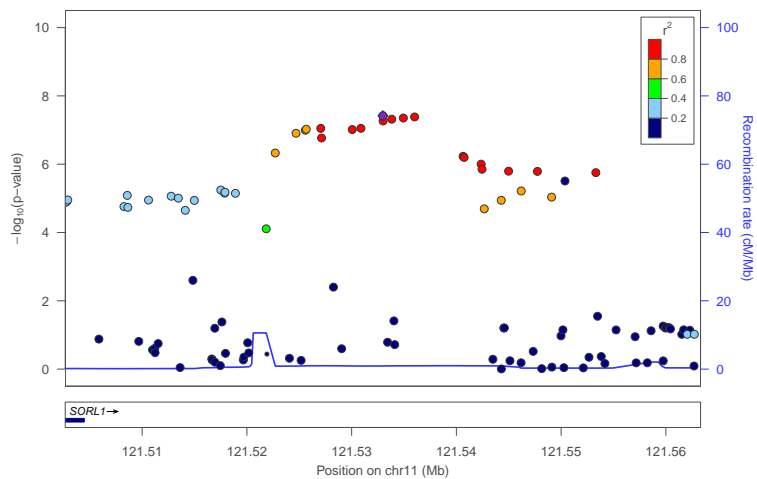

locus 382 rs10894504

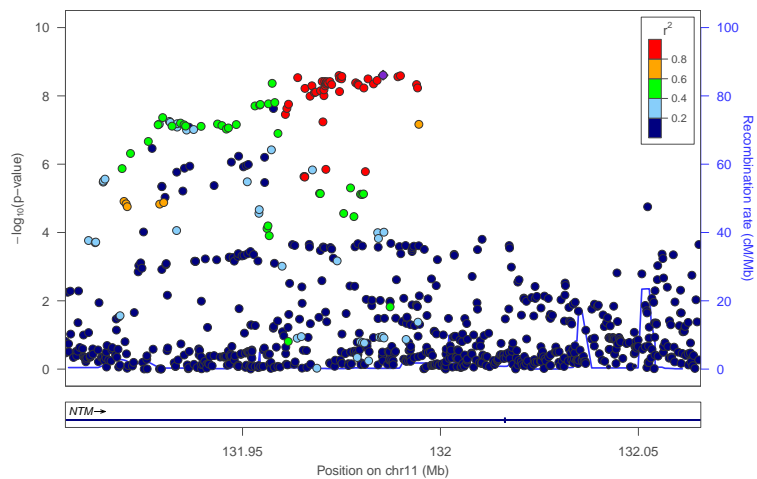

locus 383 rs4937860

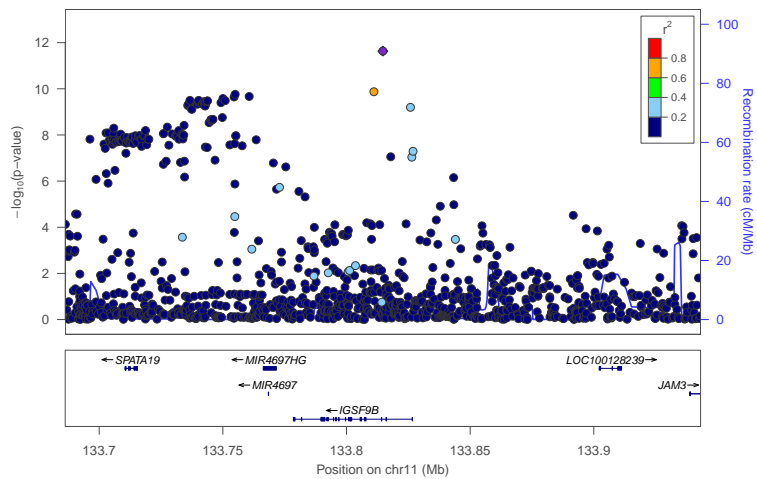

locus 384 rs58475265

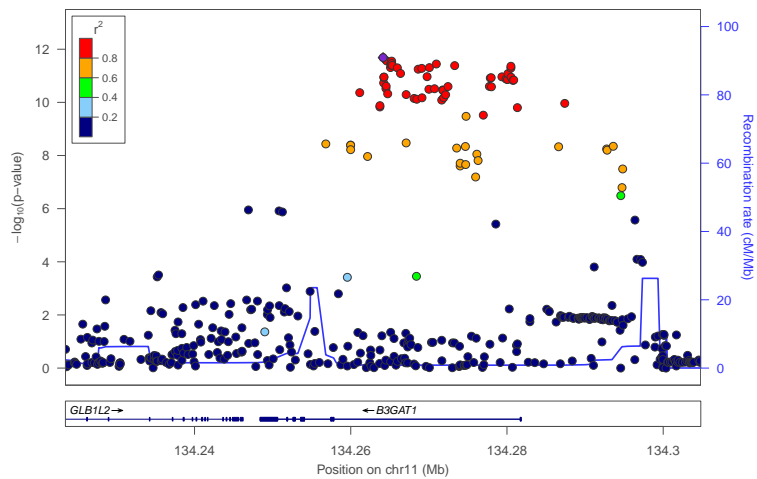

locus 385 rs35745815

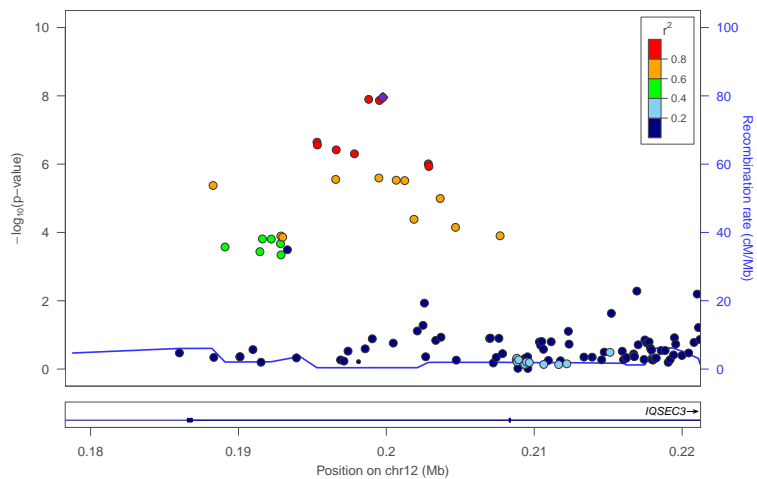

locus 386 rs2286729

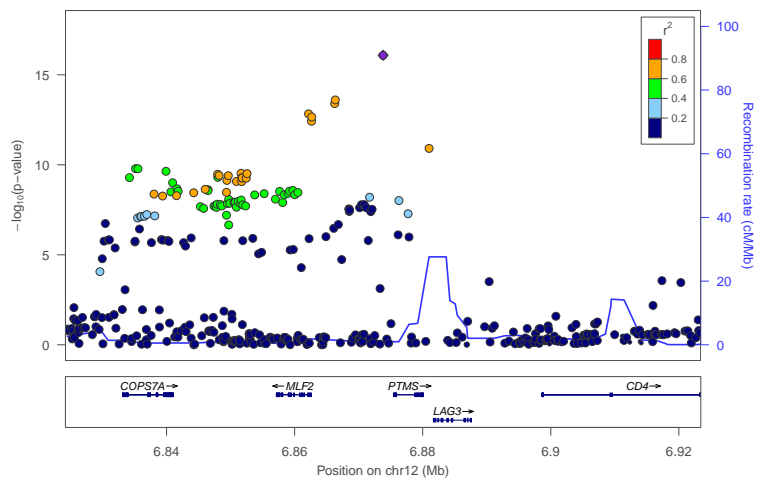



locus 387 rs547204129

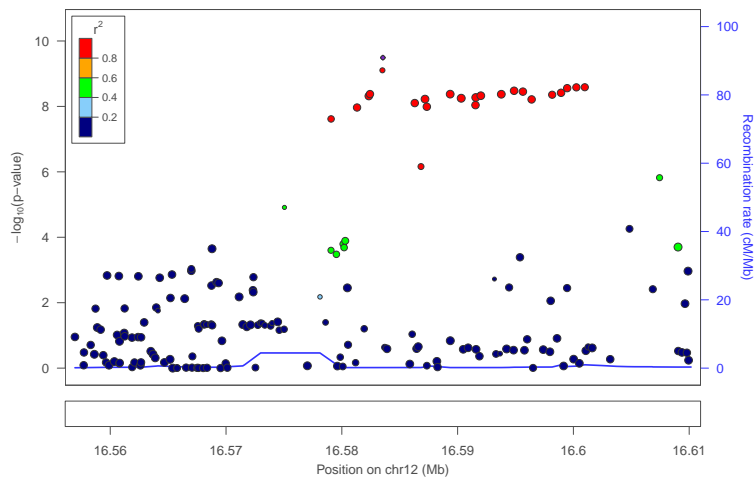

locus 388 rs10842059

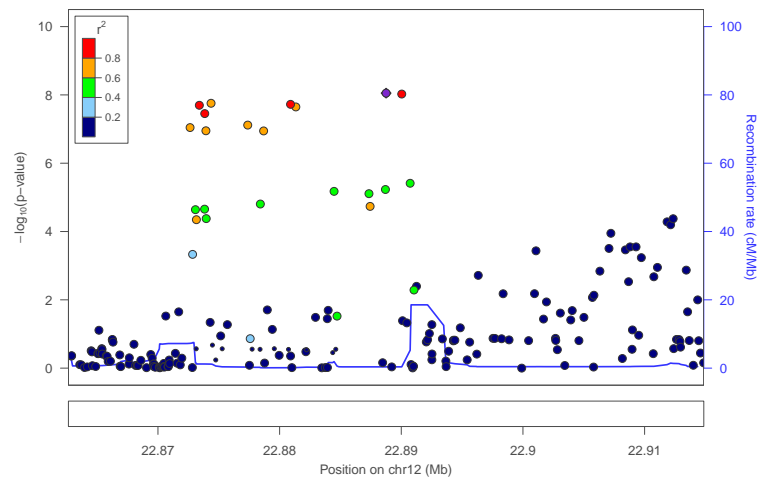

locus 389 rs11047436

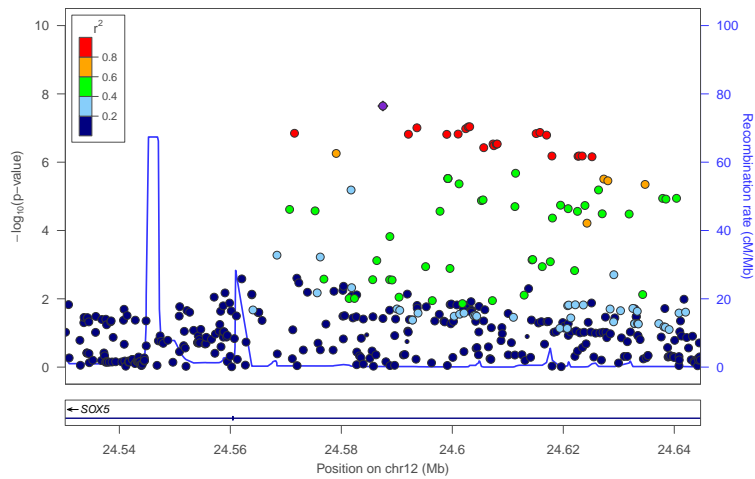

locus 390 rs12311881

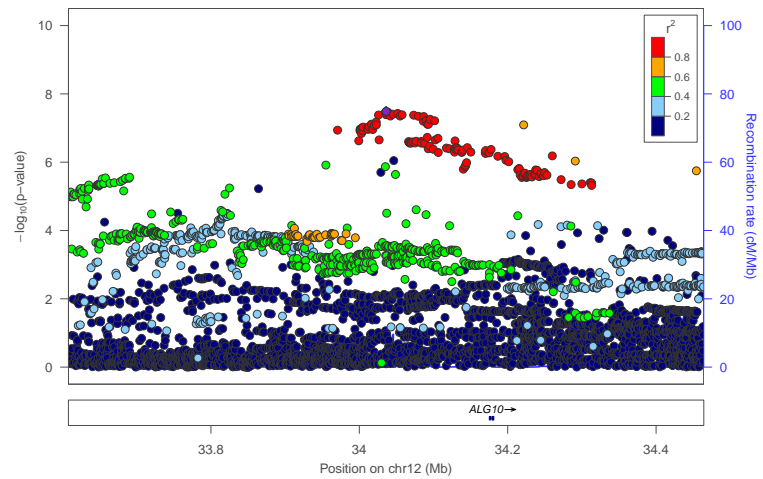

locus 391 rs10880104

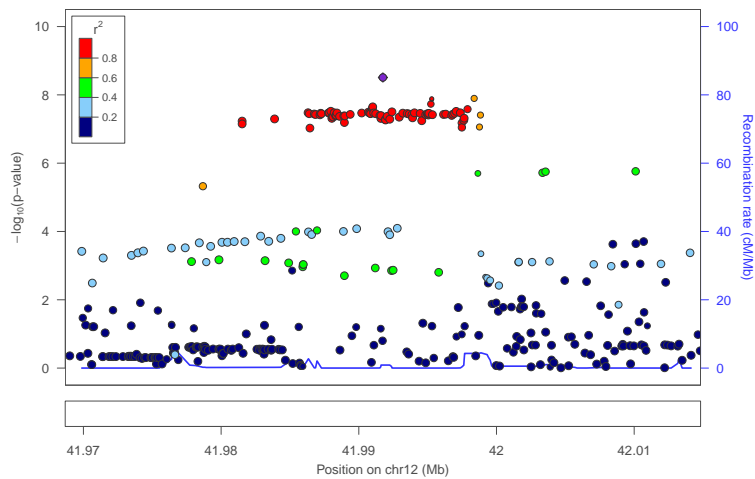

locus 392 rs12814145

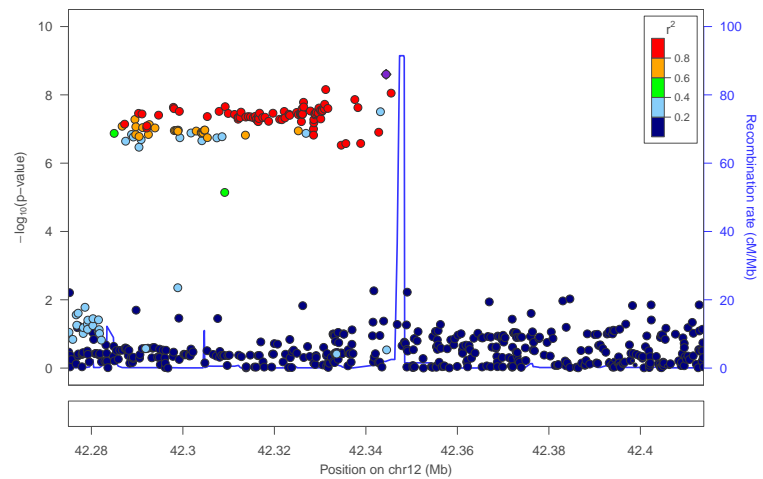

locus 393 rs1344829

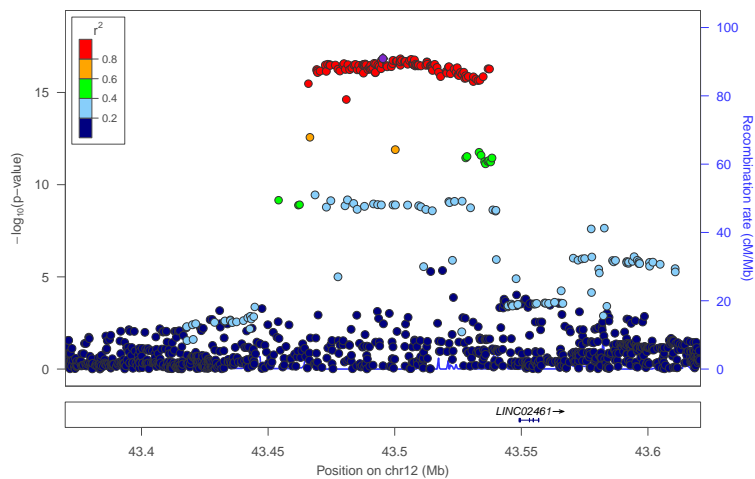

locus 394 rs12228775

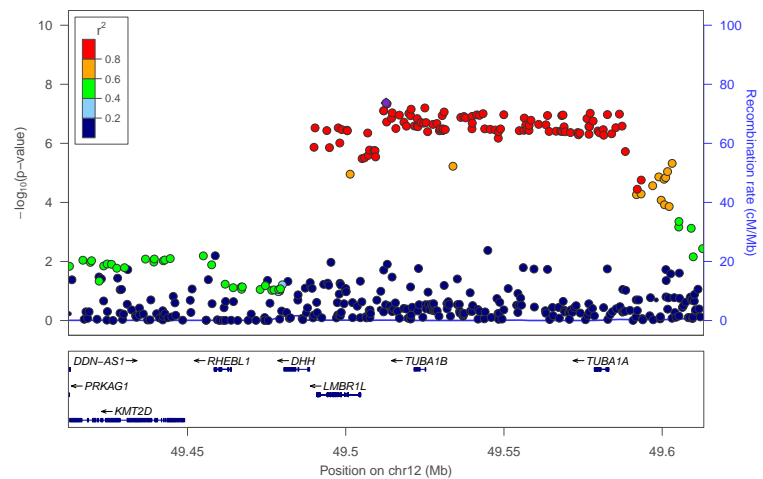

locus 395 rs7308217

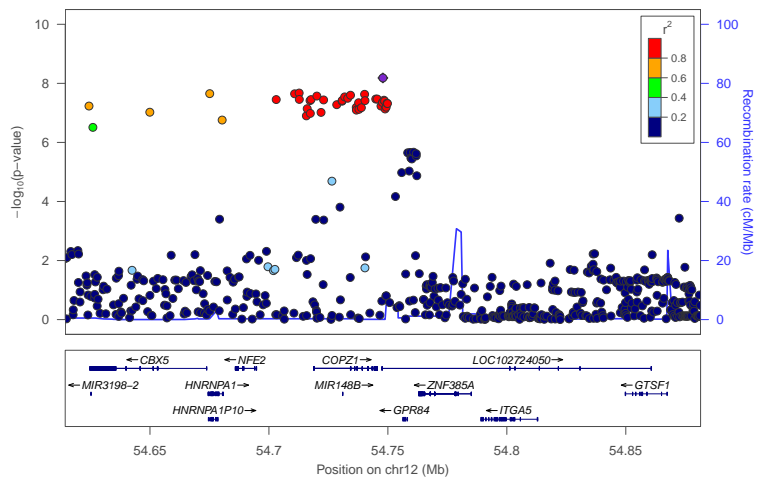

locus 396 rs703848

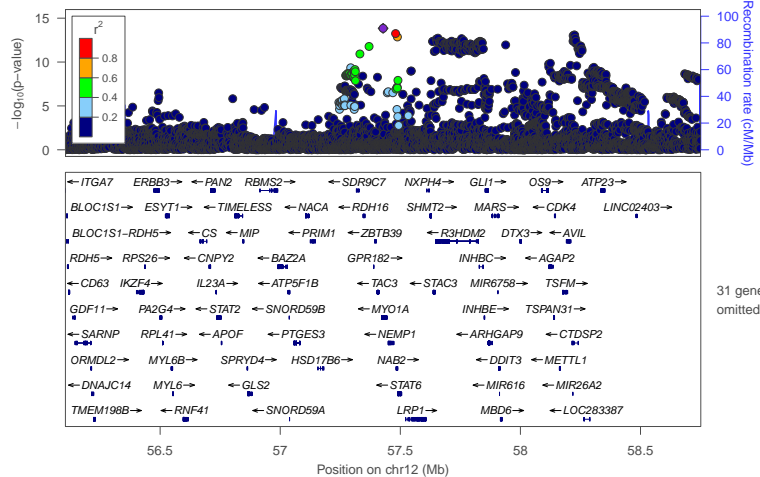

locus 397 rs11173201

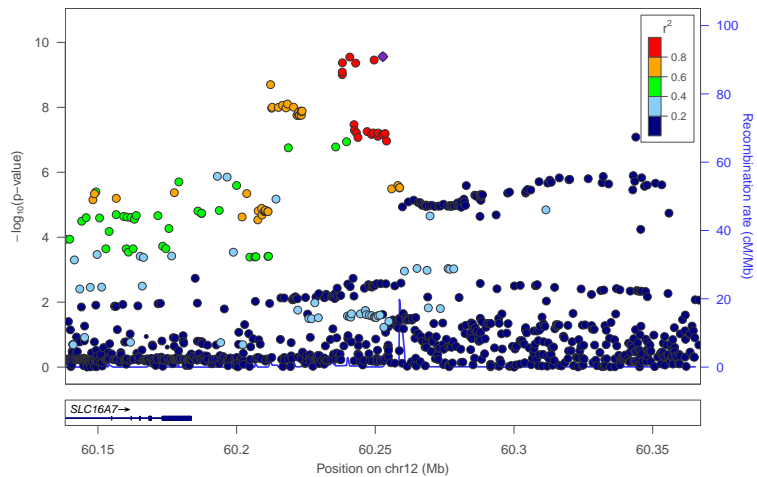

locus 398 rs542132735

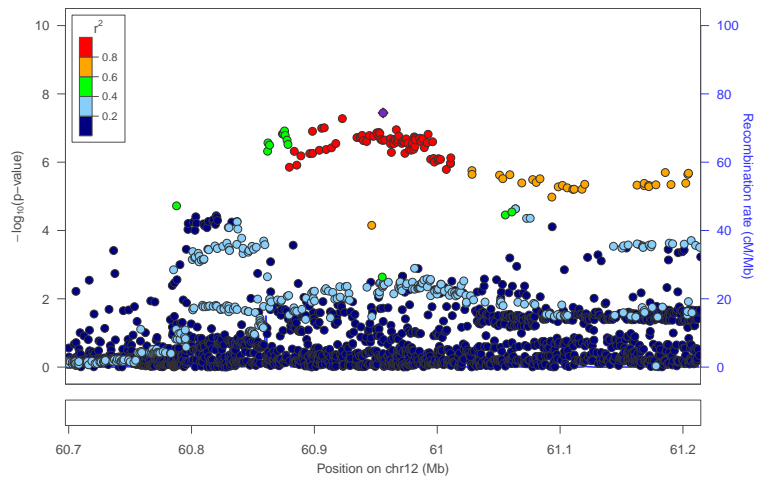

locus 399 rs61921611

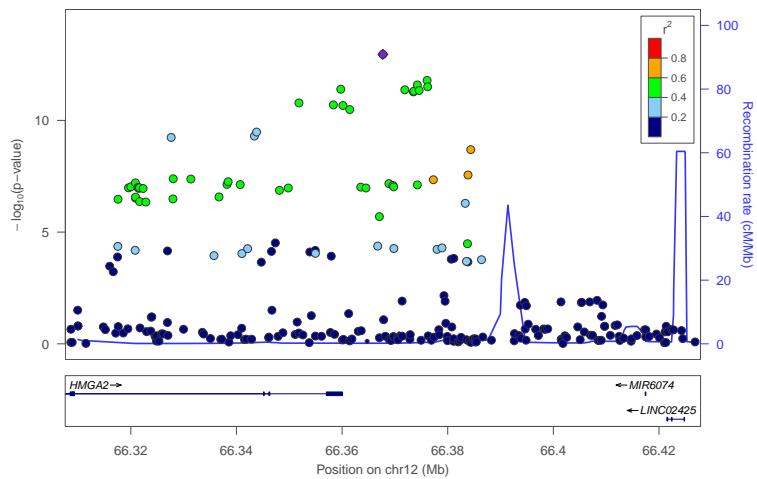

locus 400 rs10400508

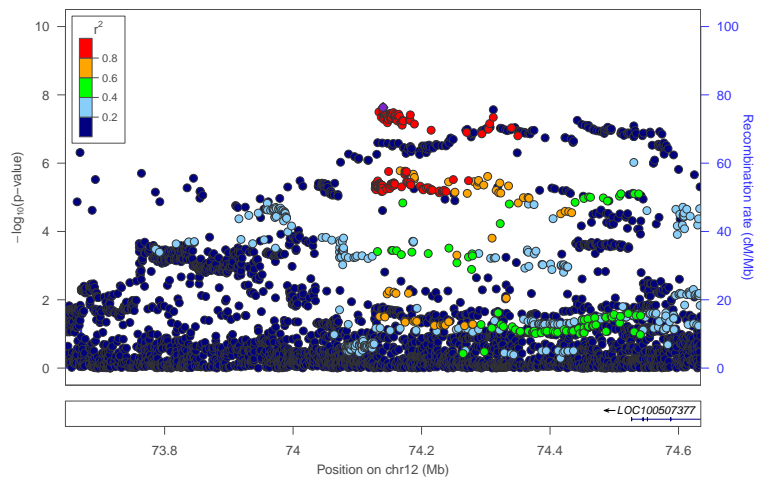

locus 401 rs7980124

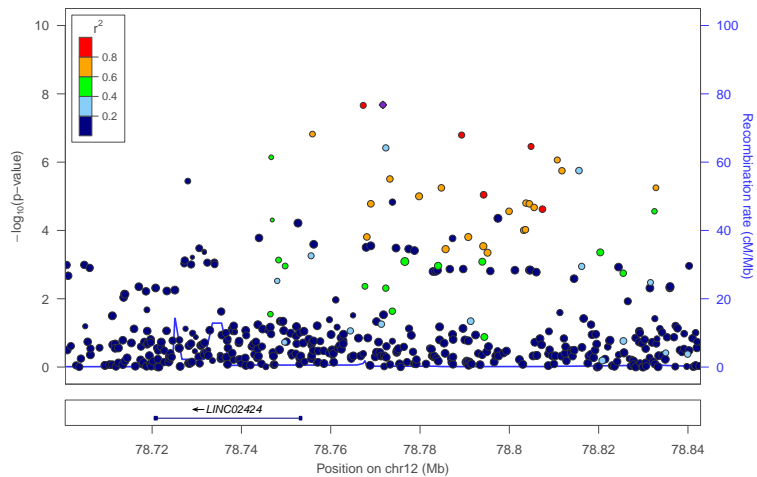

locus 402 rs12580149

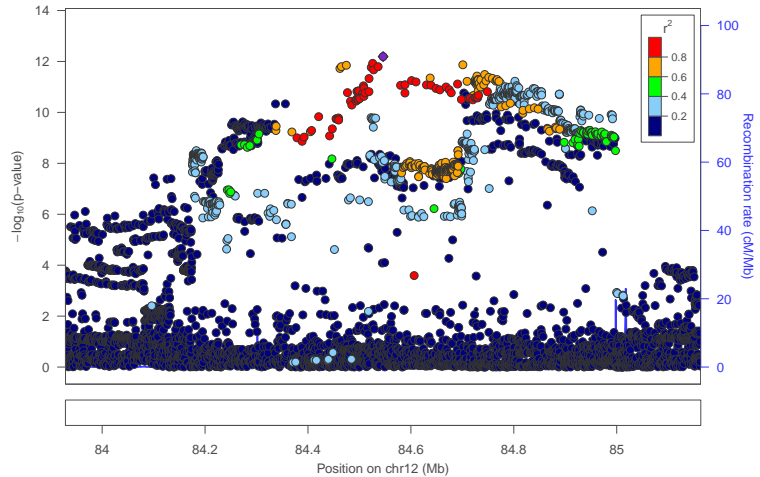

locus 403 rs797091

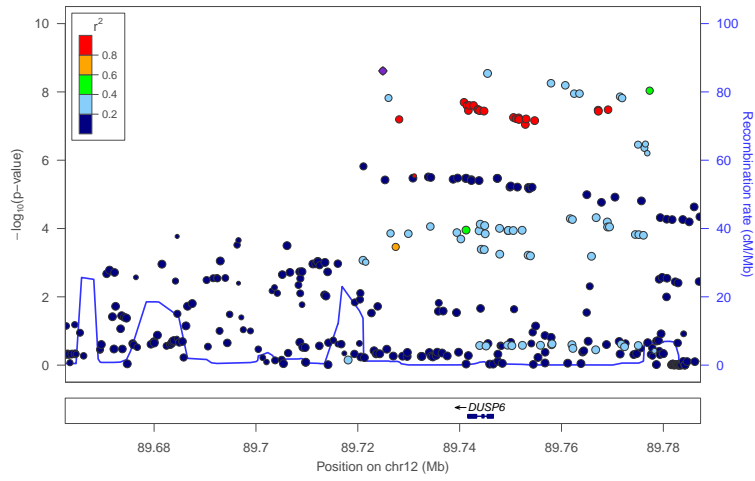

locus 404 rs9943753

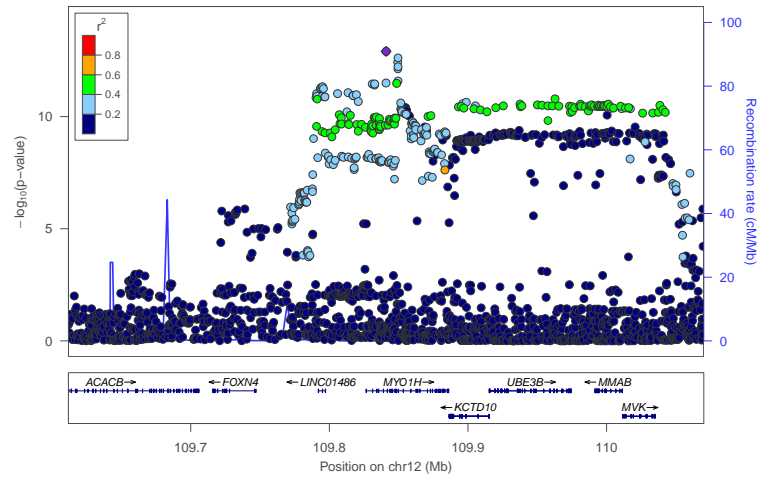

locus 405 rs7974266

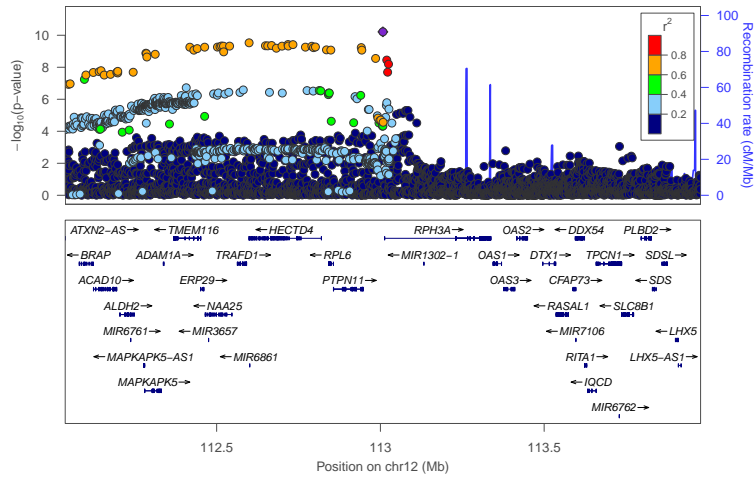

locus 406 rs1846644

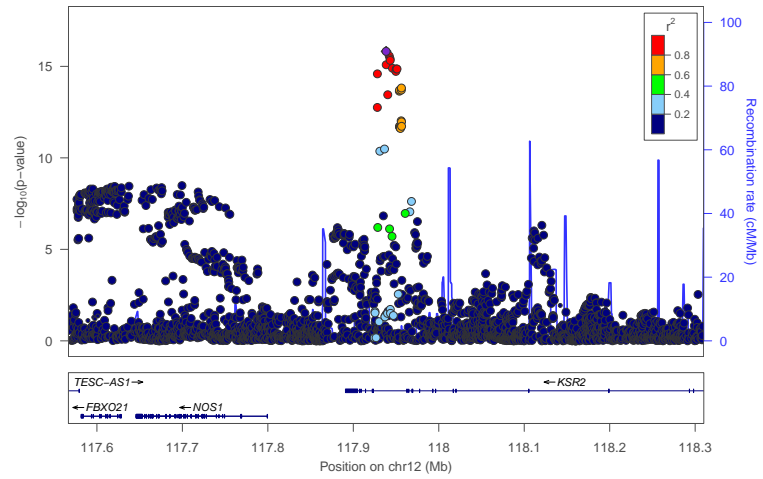

locus 407 rs2393330

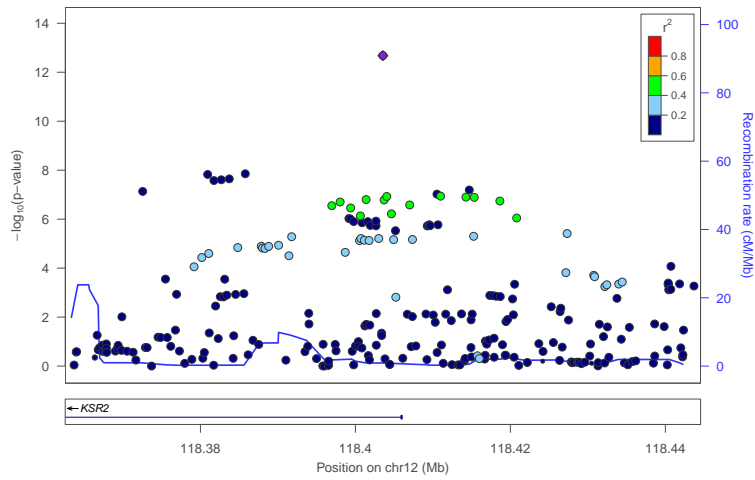

locus 408 rs585522

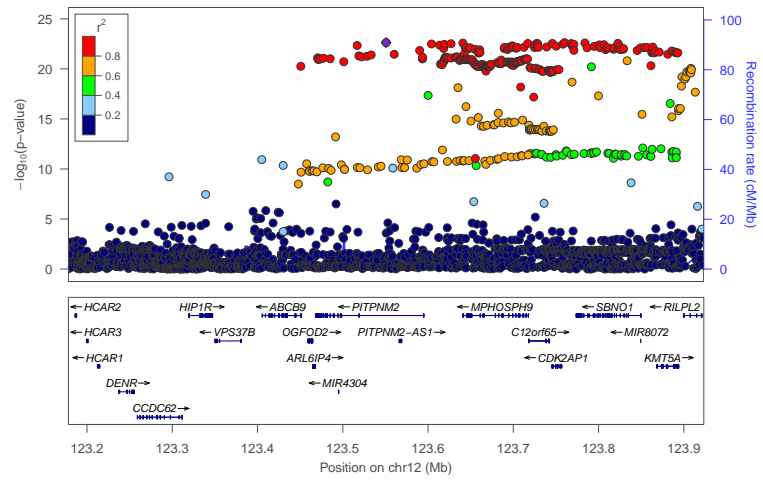

locus 409 rs7133378

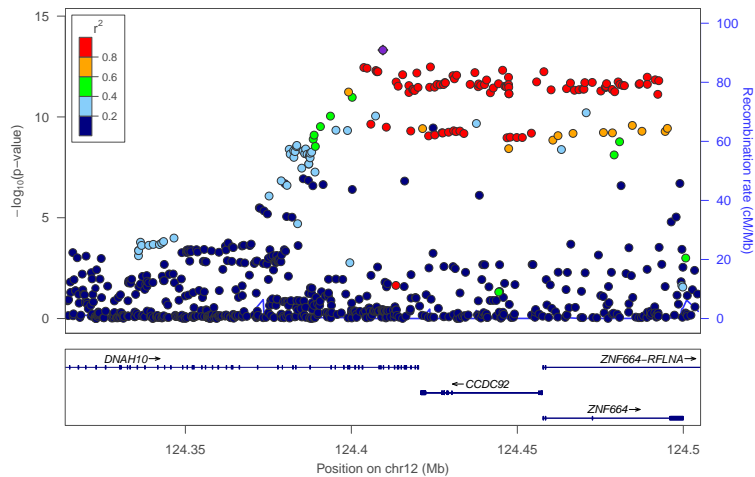

locus 410 rs9509284

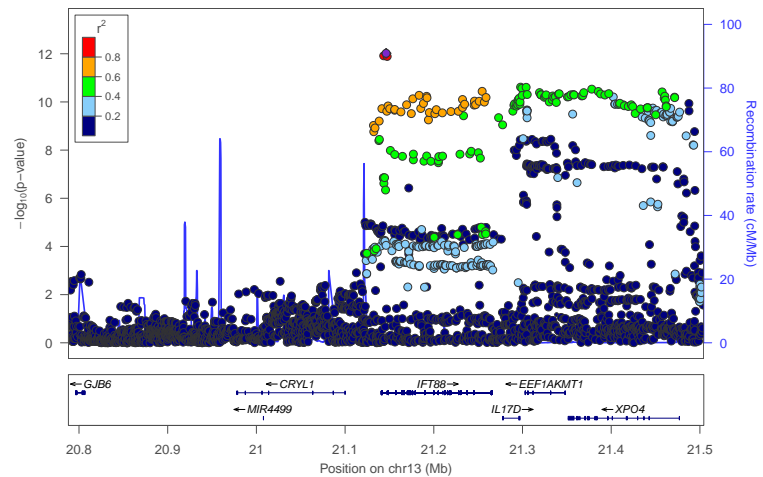

locus 411 rs9543859

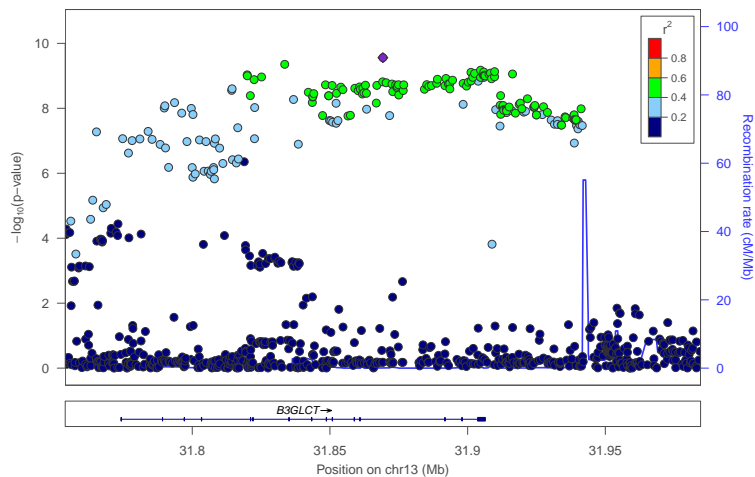

locus 412 rs407004

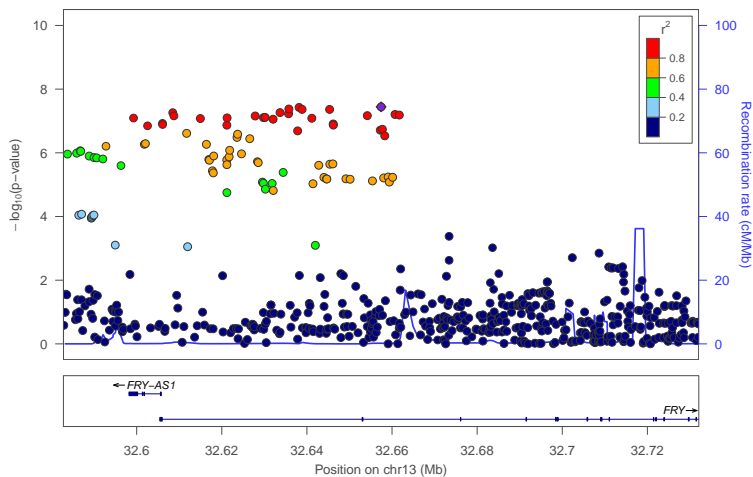

locus 413 rs9315688

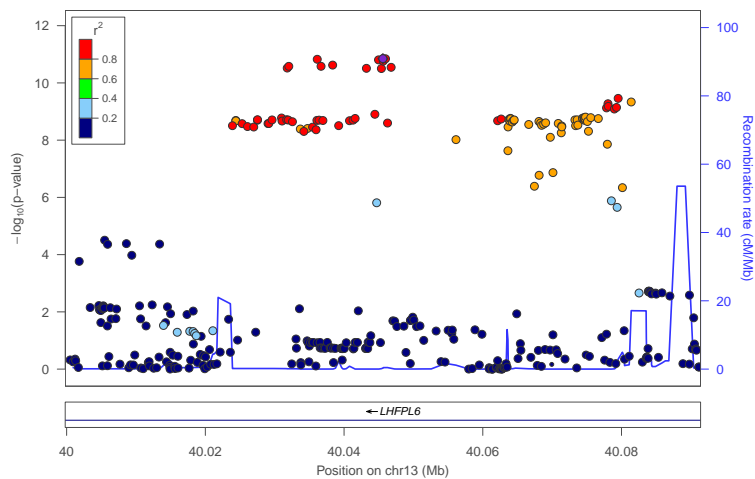

locus 414 rs4304930

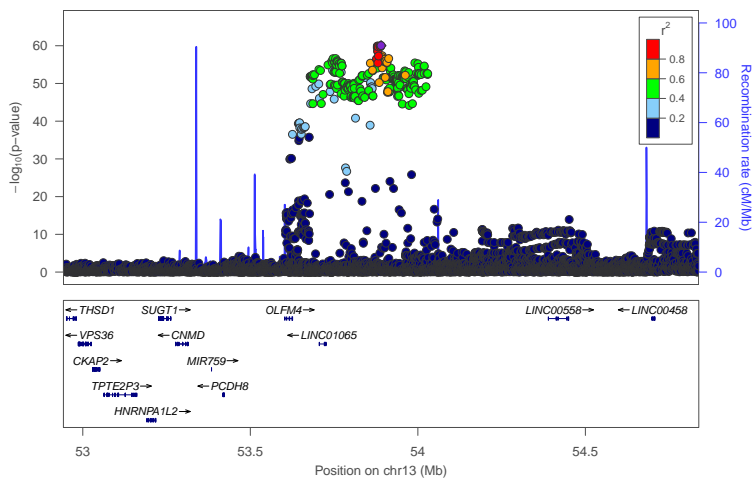

locus 415 rs139963101

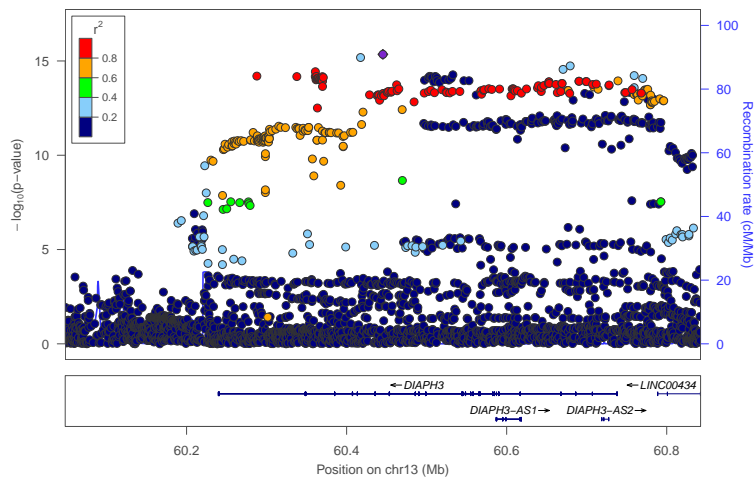

locus 416 rs9563886

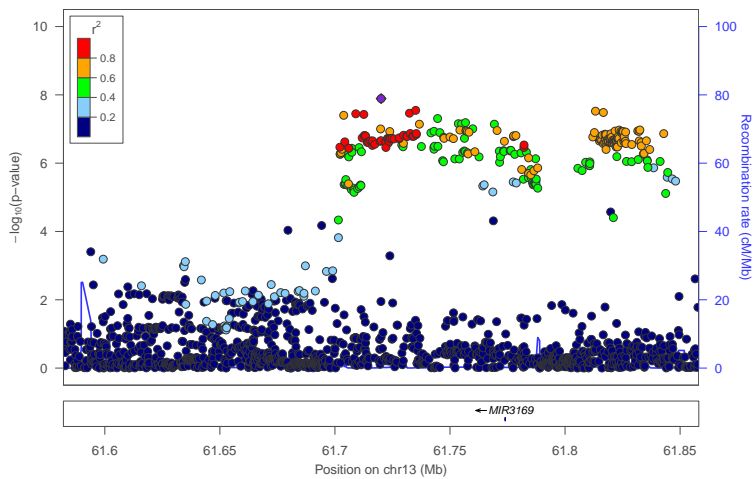

locus 417 rs9317586

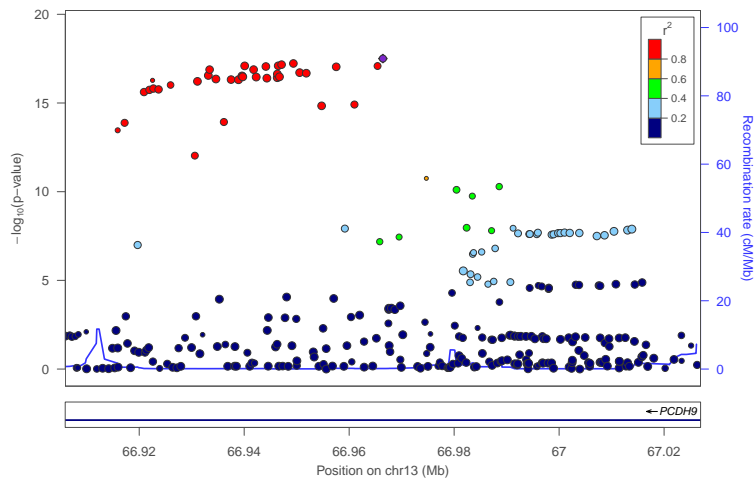

locus 418 rs1925750

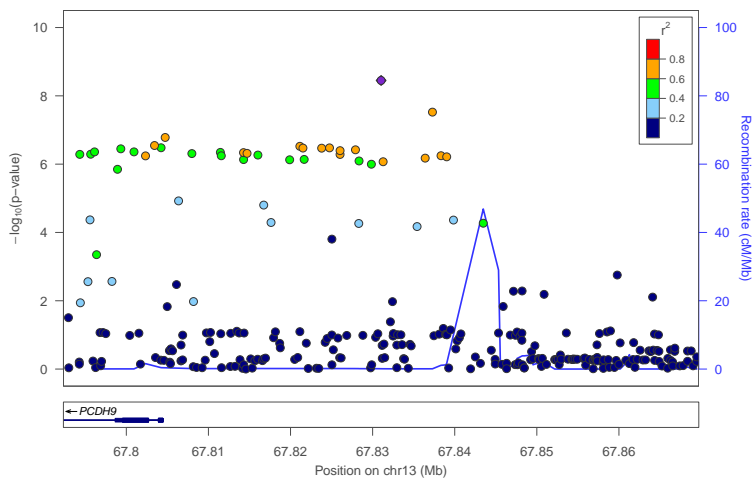



locus 419 rs1876400

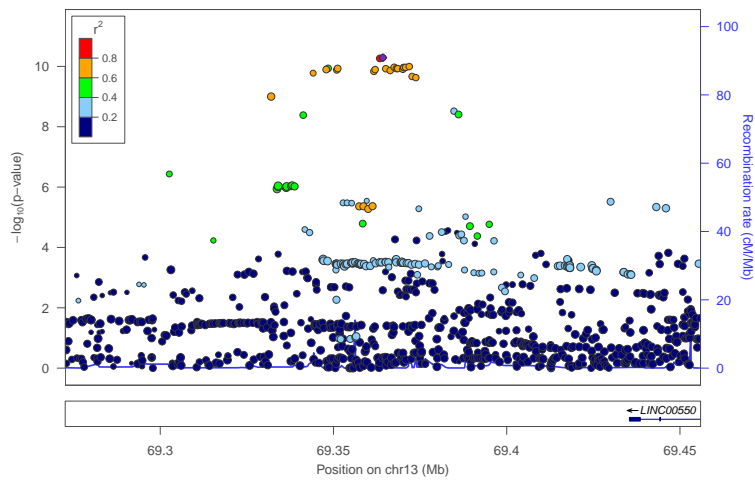

locus 420 rs2782446

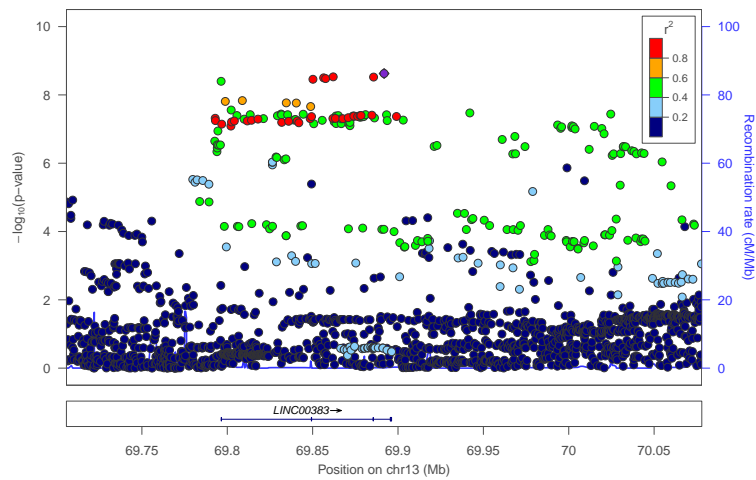

locus 421 rs7338765

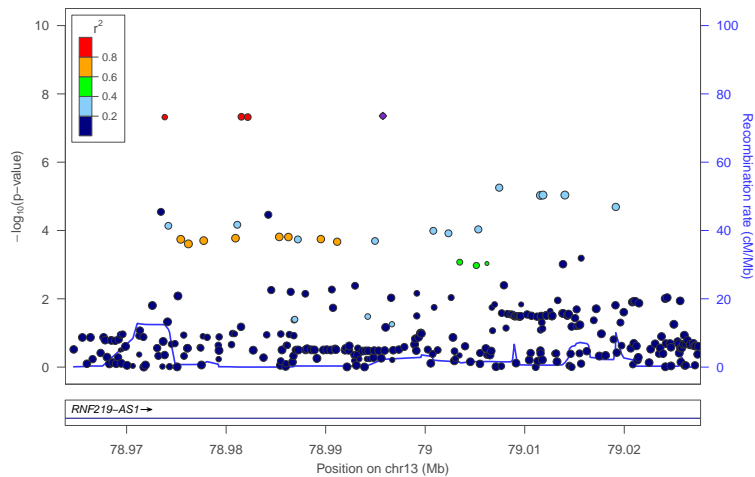

locus 422 rs73532287

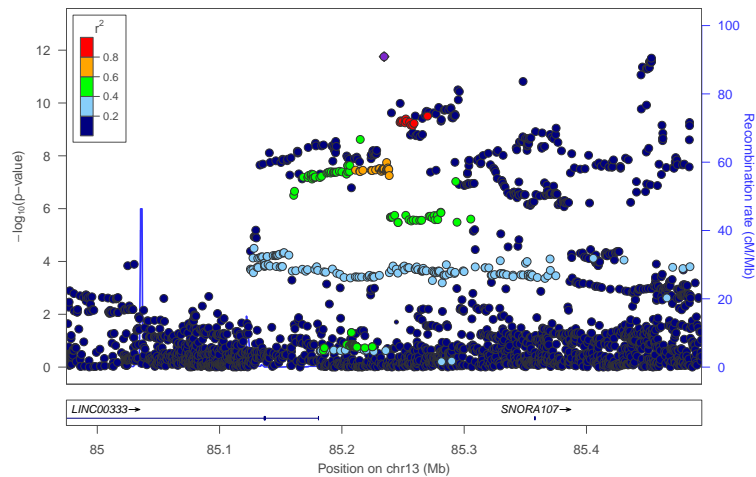

locus 423 rs1411751

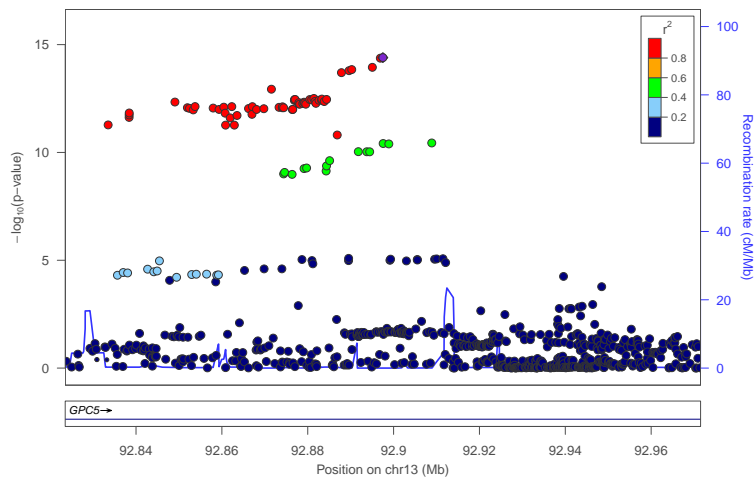

locus 424 rs9561317

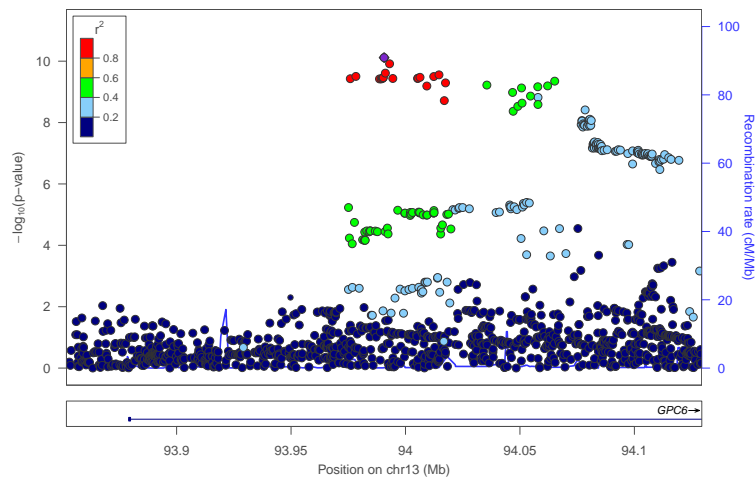

locus 425 rs1925107

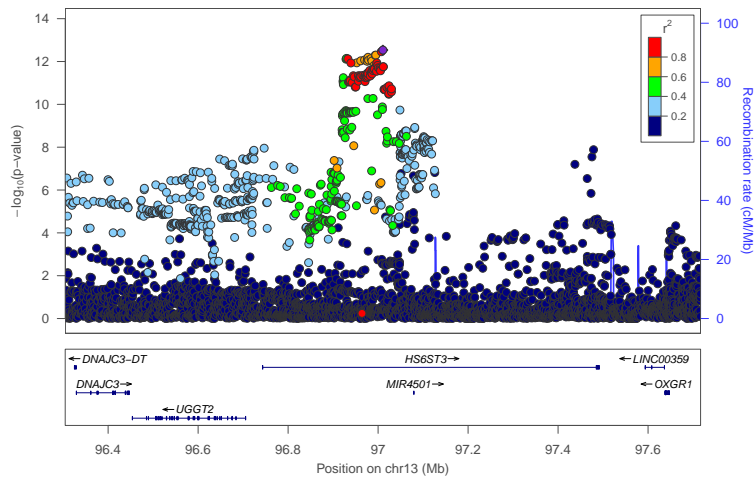

locus 426 rs143612171

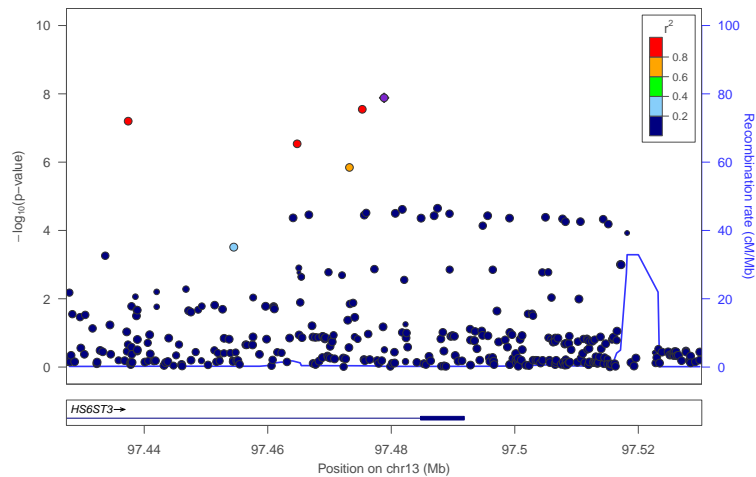

locus 427 rs4772087

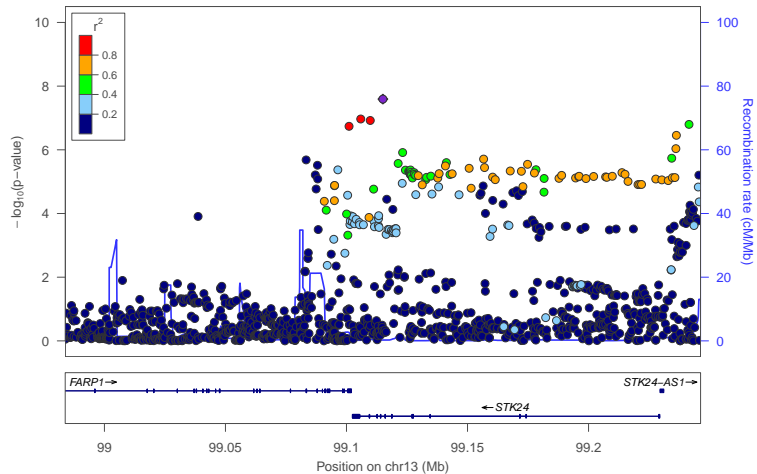

locus 428 rs61965119

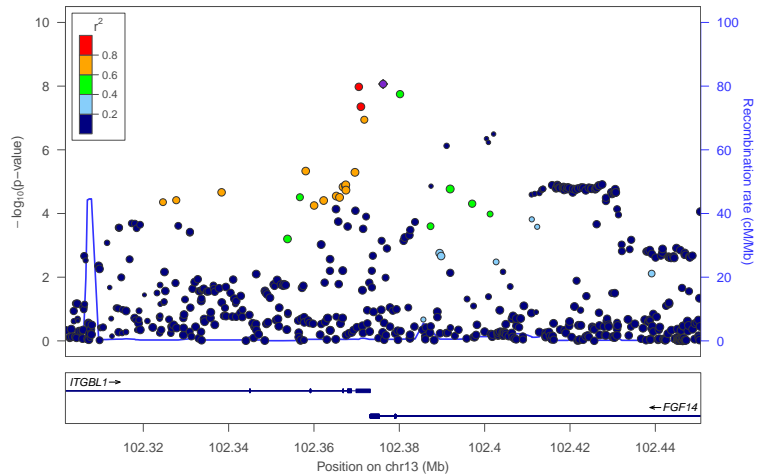

locus 429 rs17416209

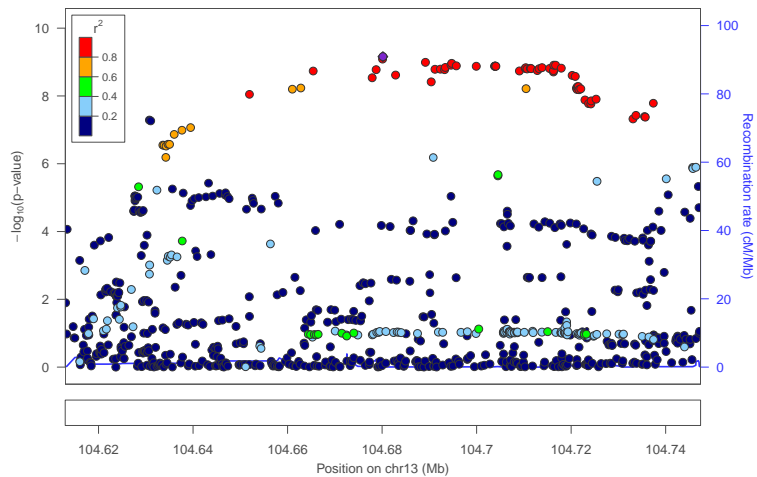

locus 430 rs275950

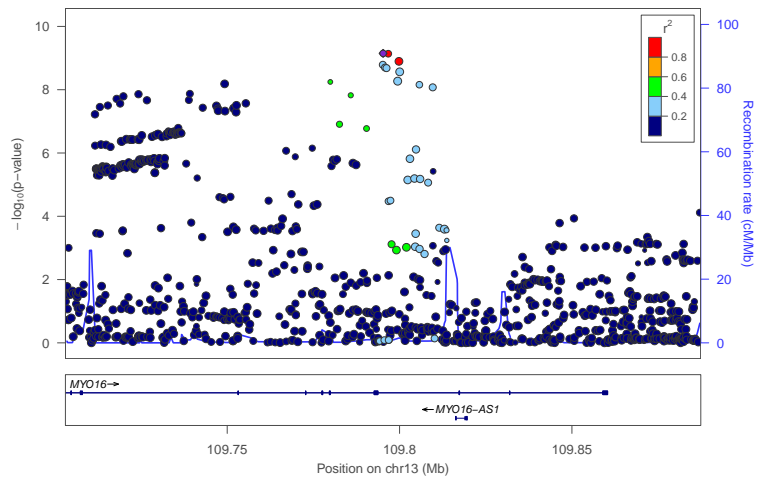

locus 431 rs1536053

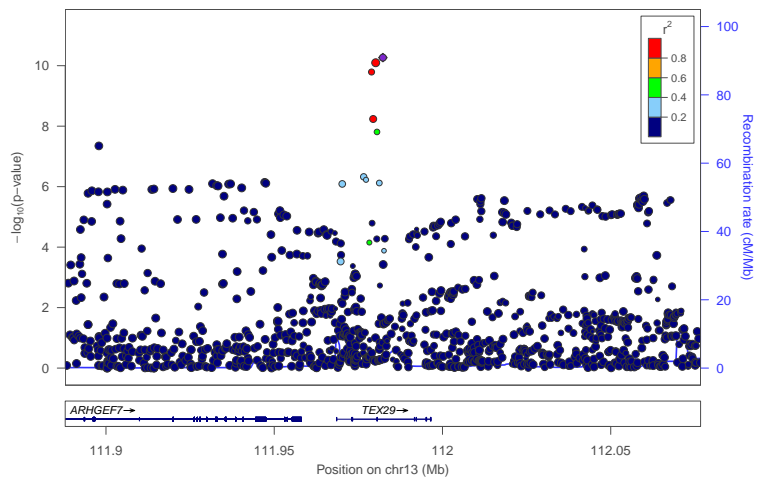

locus 432 rs61979497

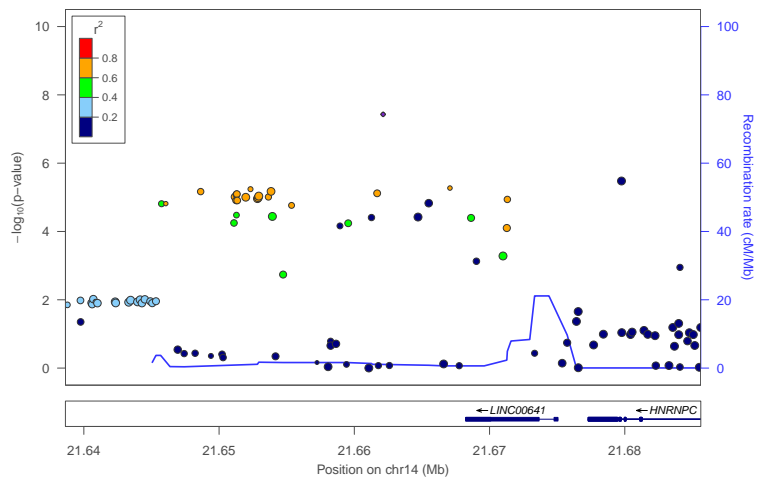

locus 433 rs4981170

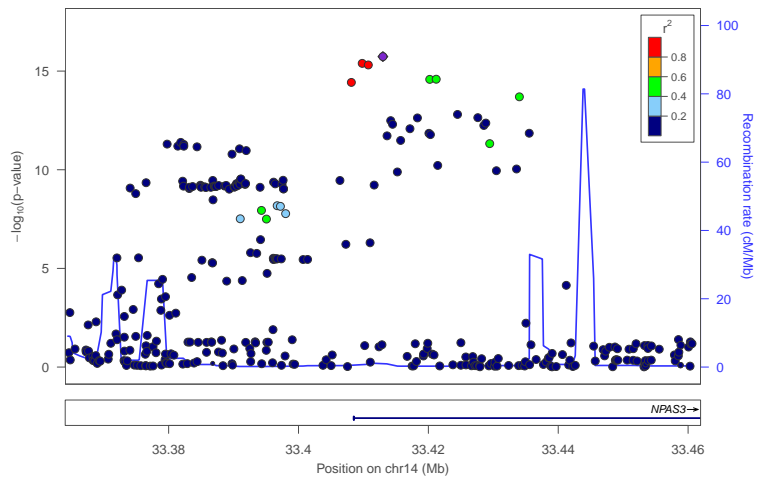

locus 434 rs10148610

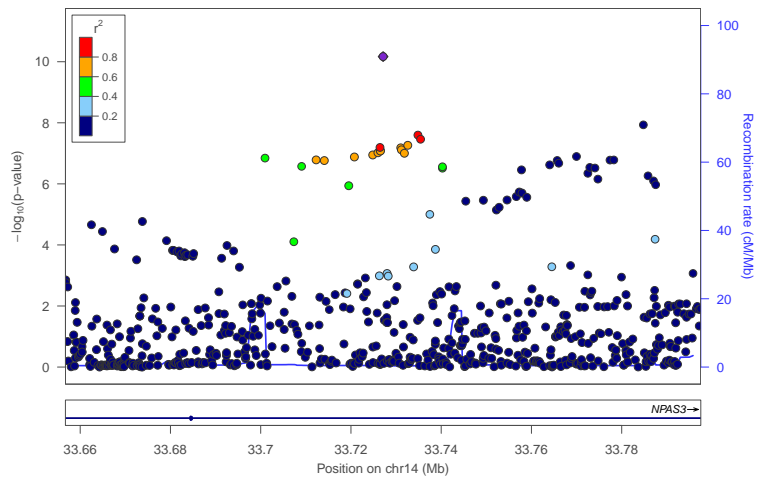

locus 435 rs12893801

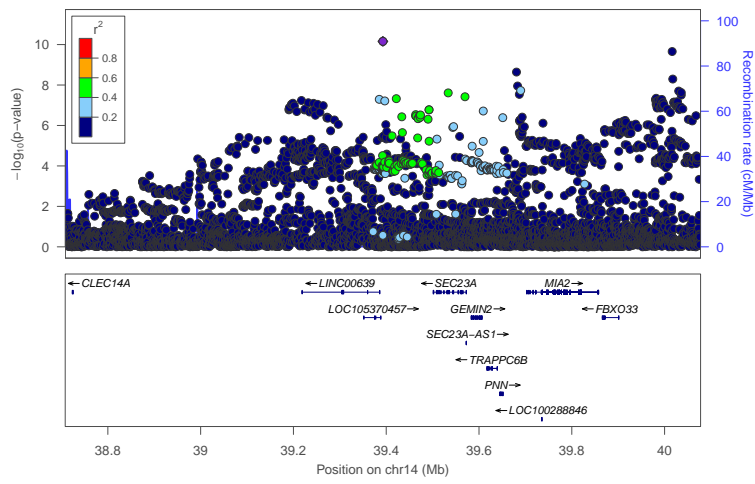

locus 436 rs1584317

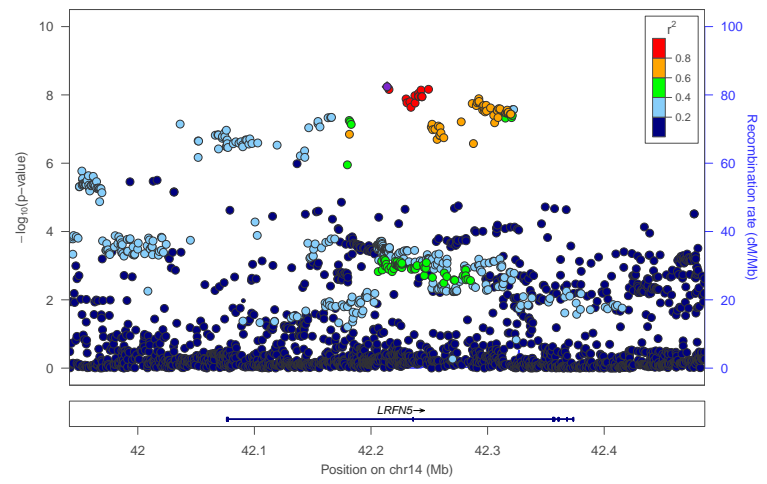

locus 437 rs34772727

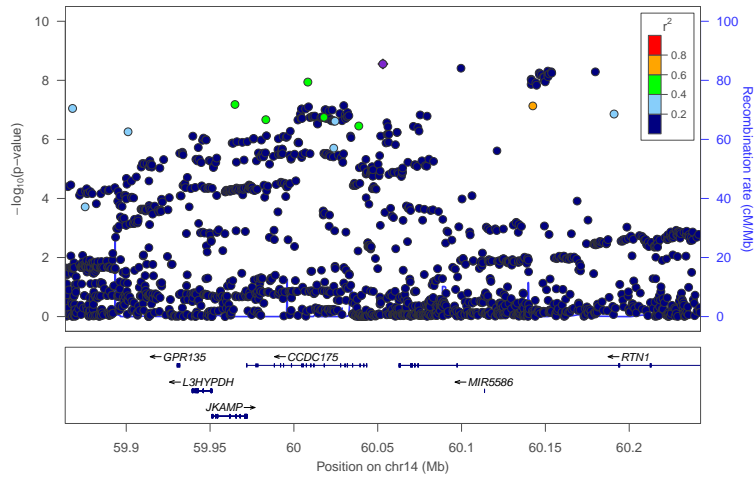

locus 438 rs1007841

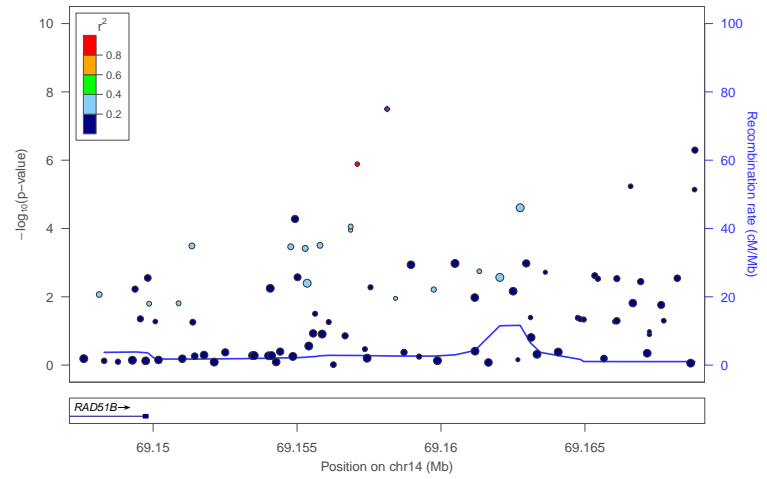

locus 439 rs201404034

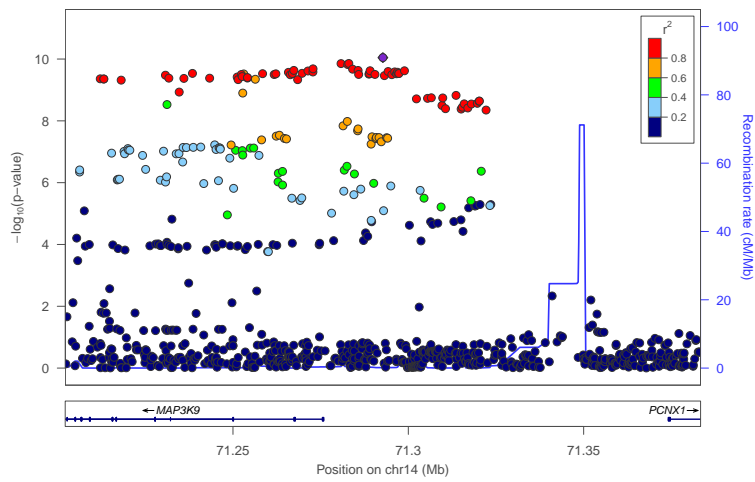

locus 440 rs3783955

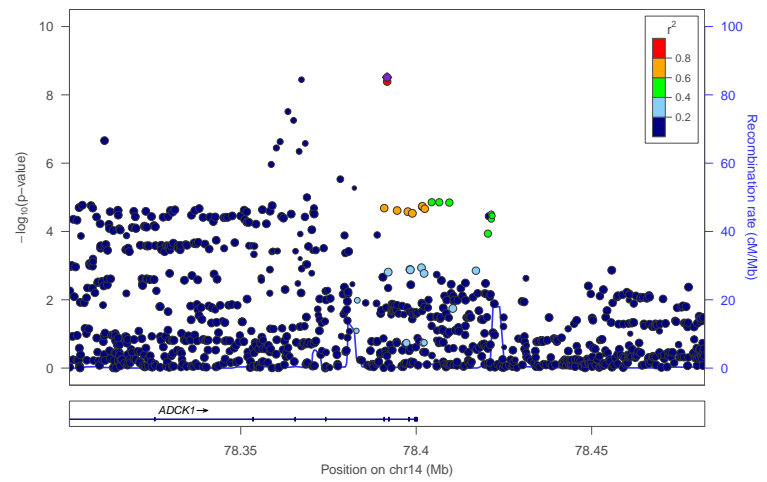

locus 441 rs17836224

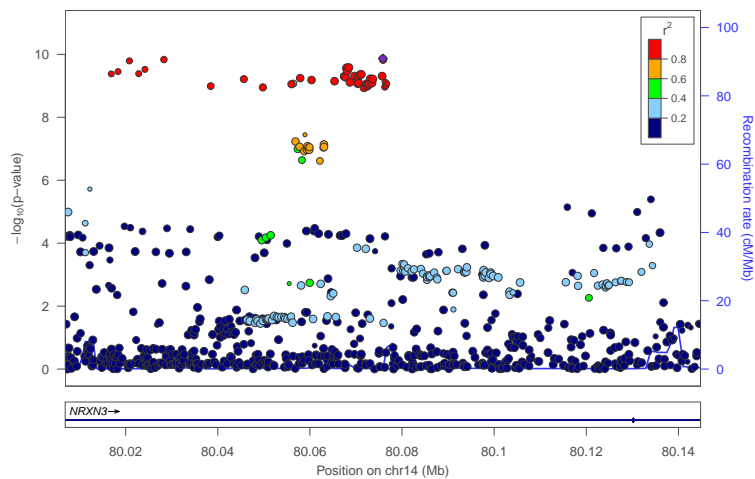

locus 442 rs12431506

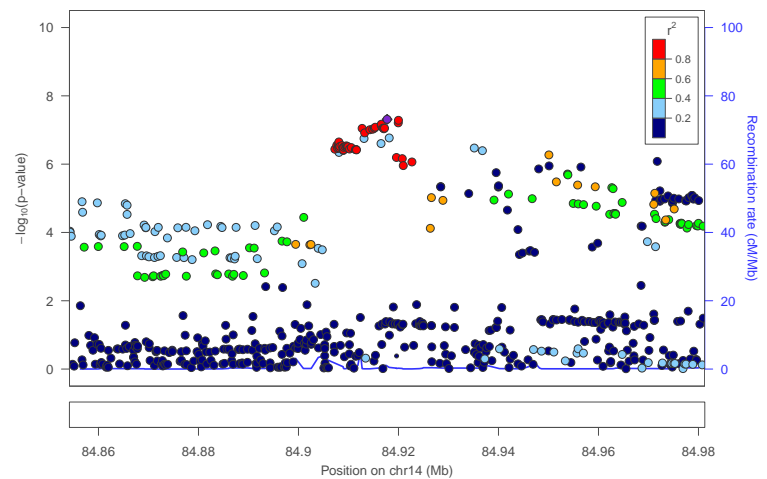

locus 443 rs61981985

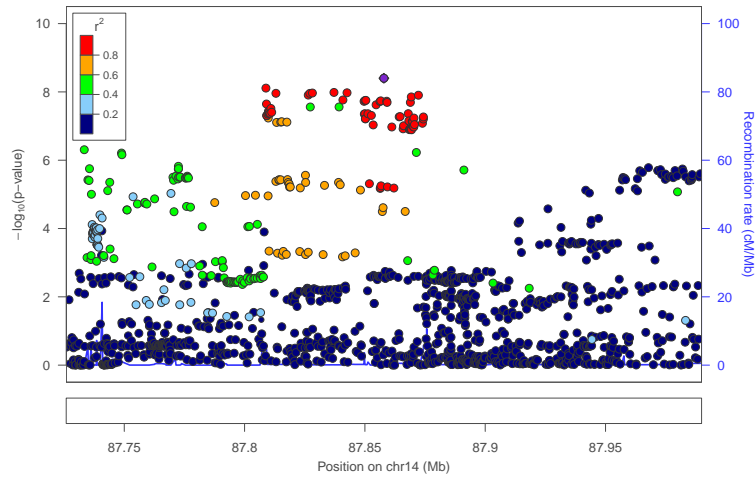

locus 444 rs10137365

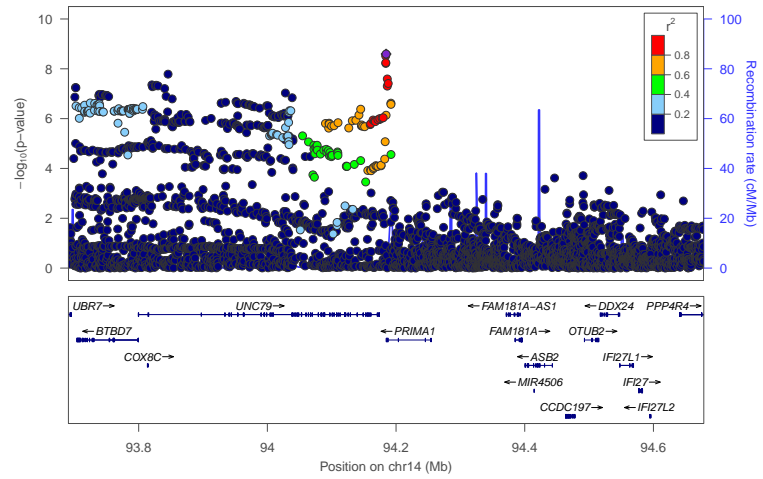

locus 445 rs736929

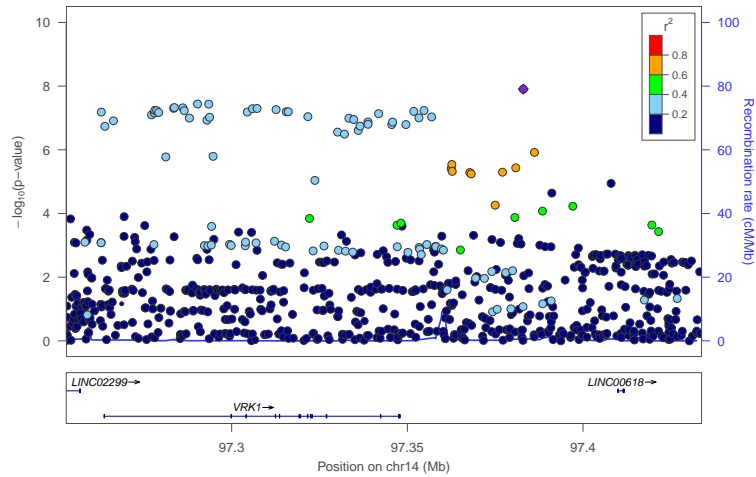

locus 446 rs10143433

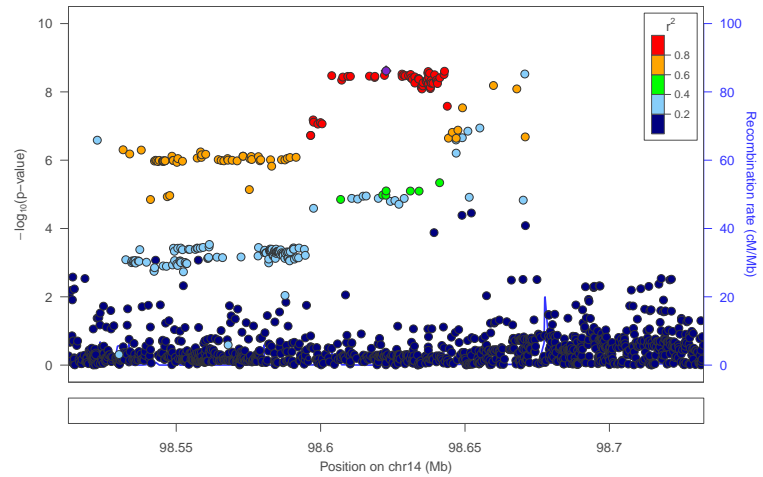

locus 447 rs2664299

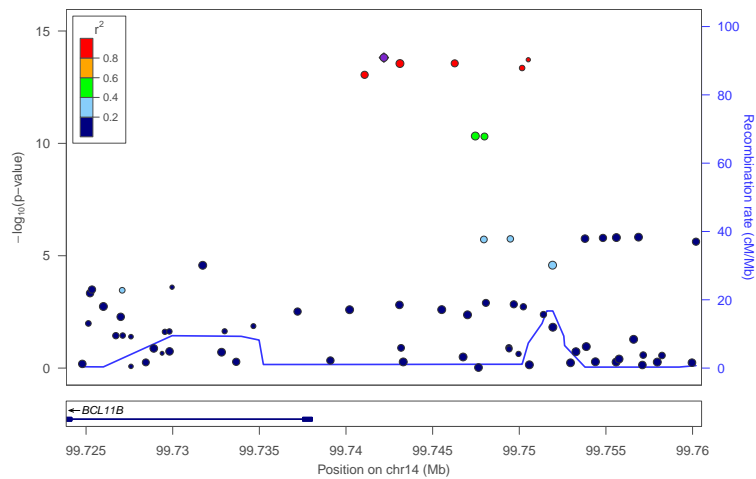

locus 448 rs911324

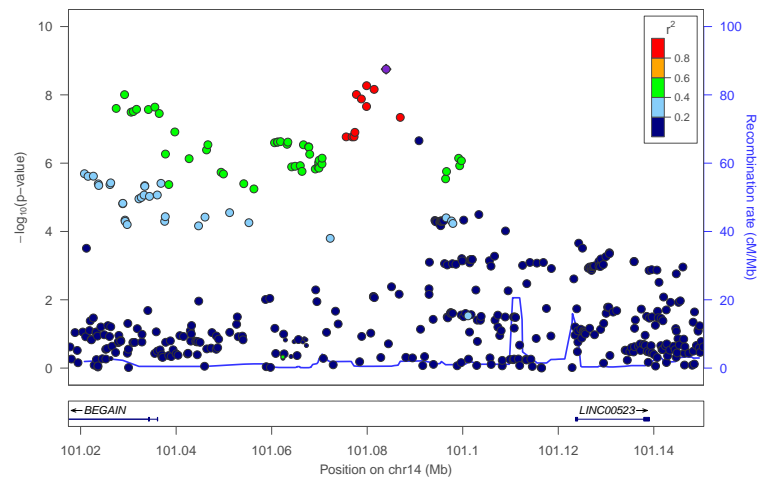

locus 449 rs4906347

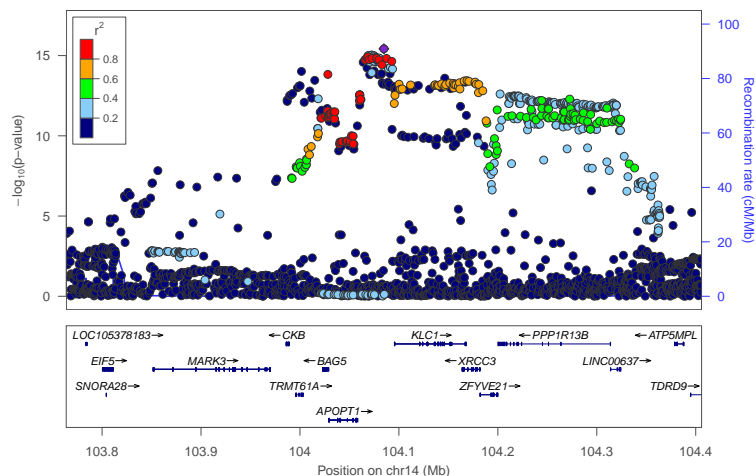

locus 450 rs12324269

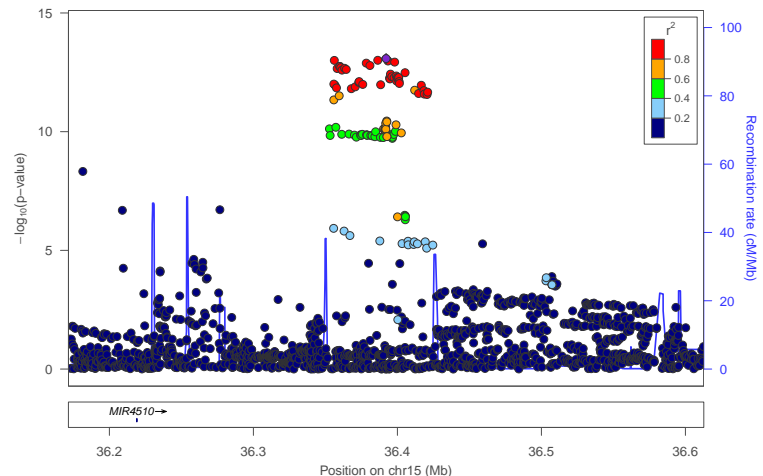



locus 451 rs8036386

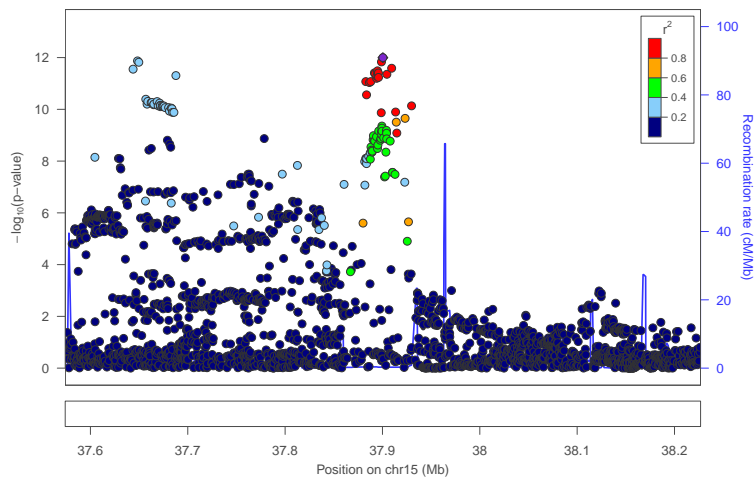

locus 452 rs7173565

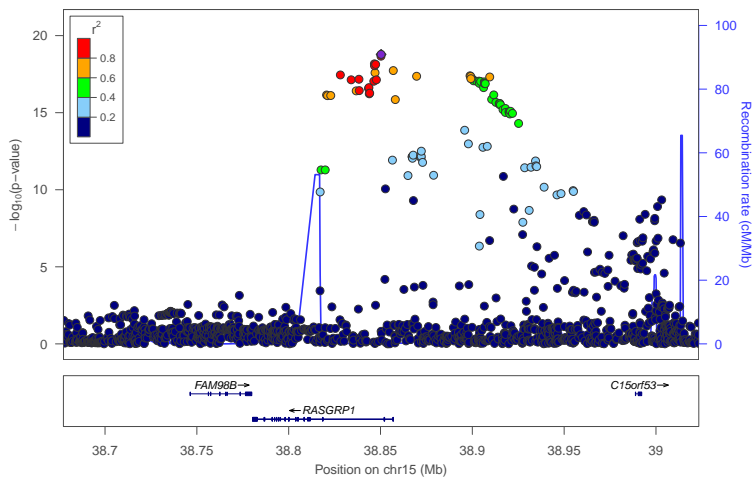

locus 453 rs12594473

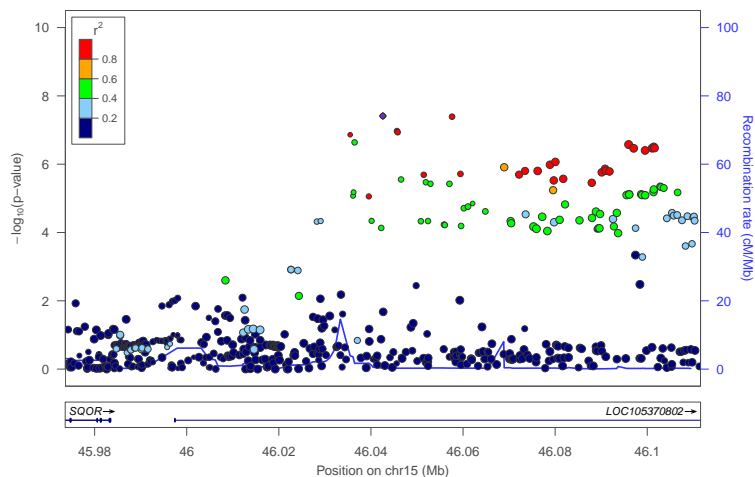

locus 454 rs281222

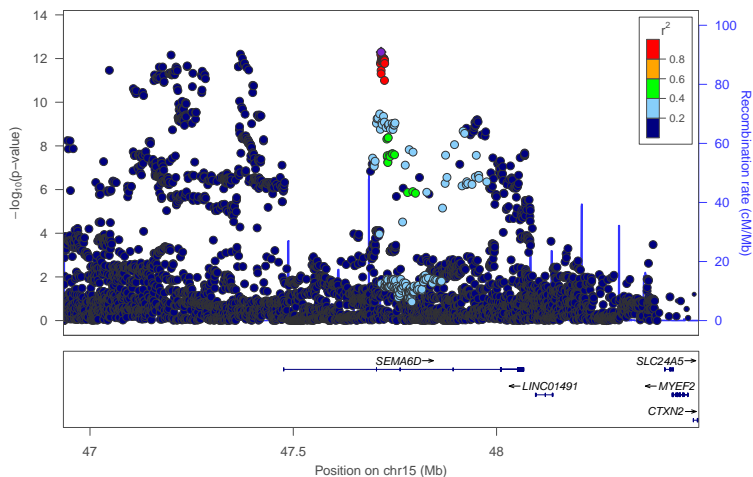

locus 455 rs7183479

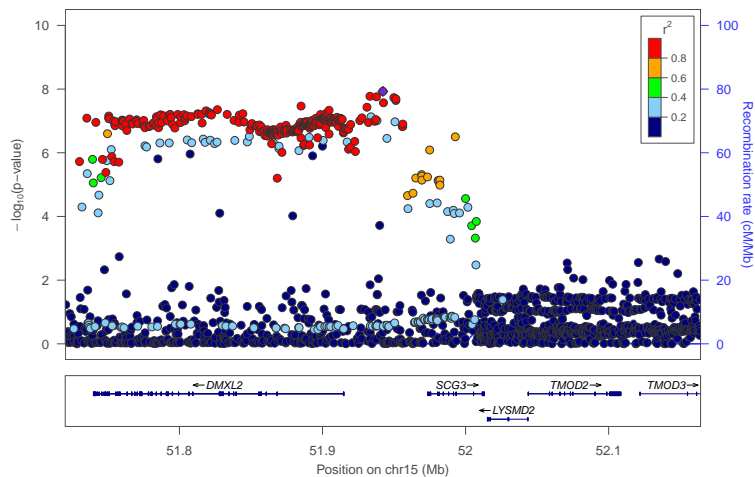

locus 456 rs2456523

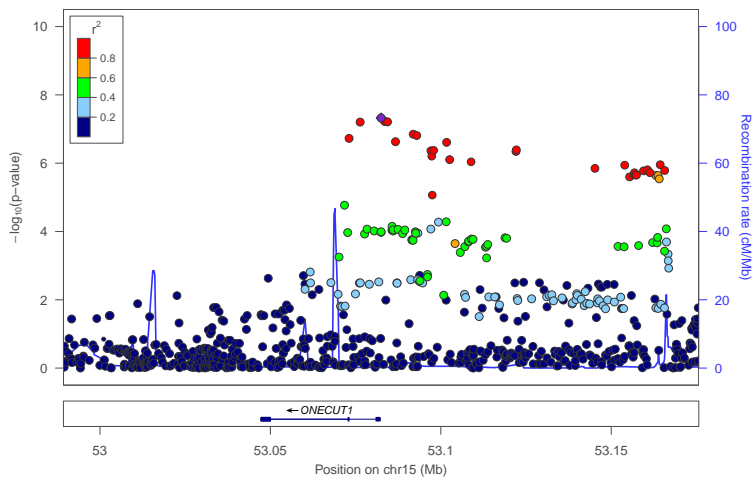

locus 457 rs2615252

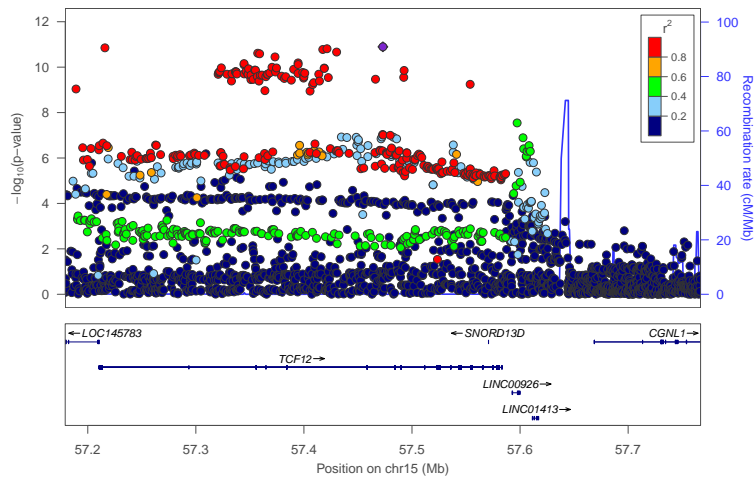

locus 458 rs11856510

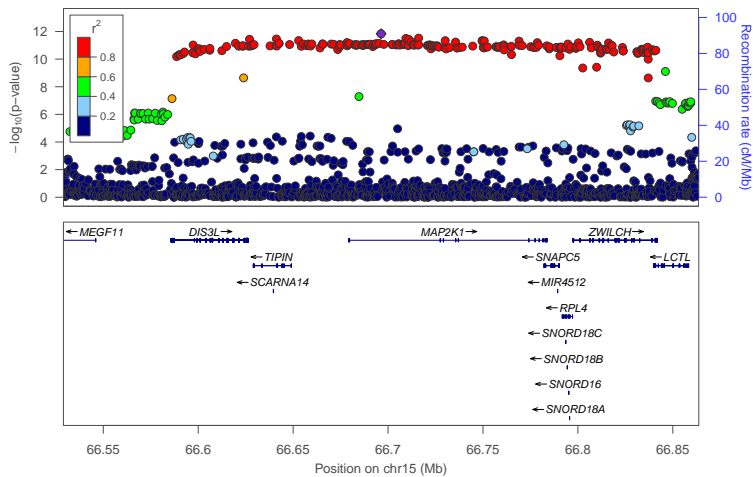

locus 459 rs8025163

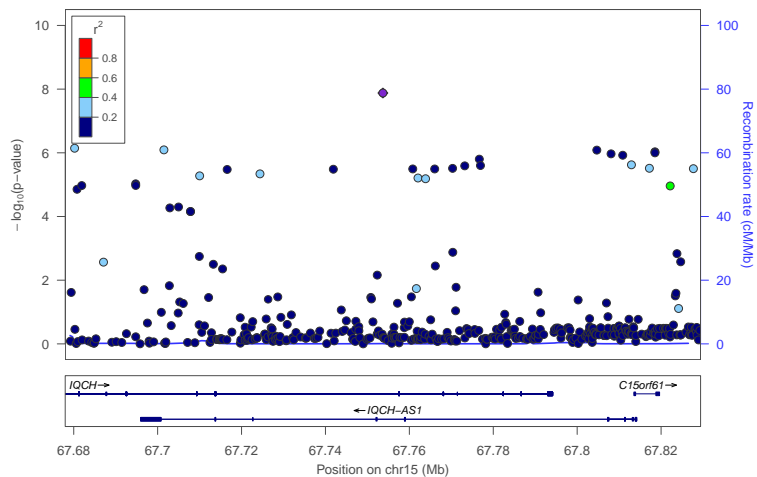

locus 460 rs7162423

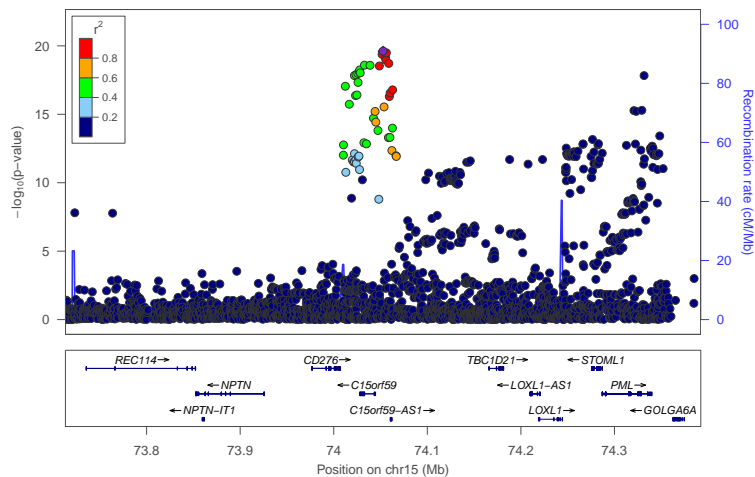

locus 461 rs35095870

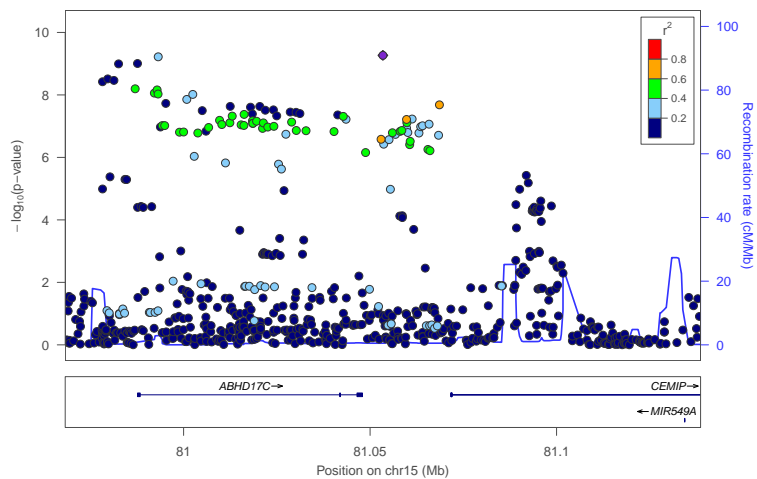

locus 462 rs16976763

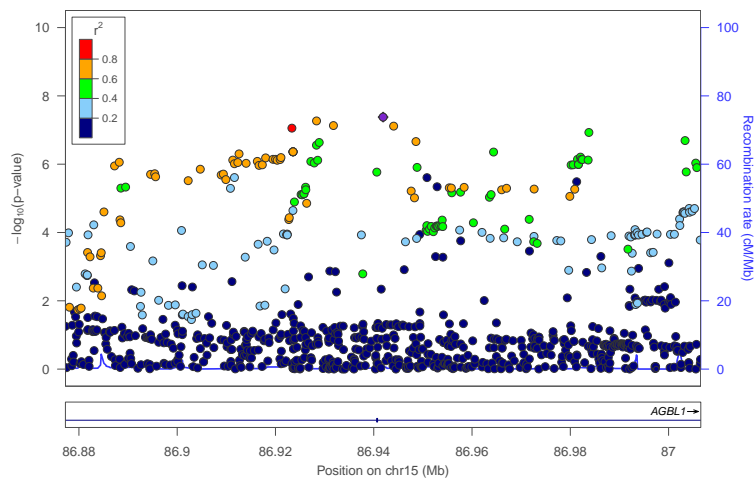

locus 463 rs176644

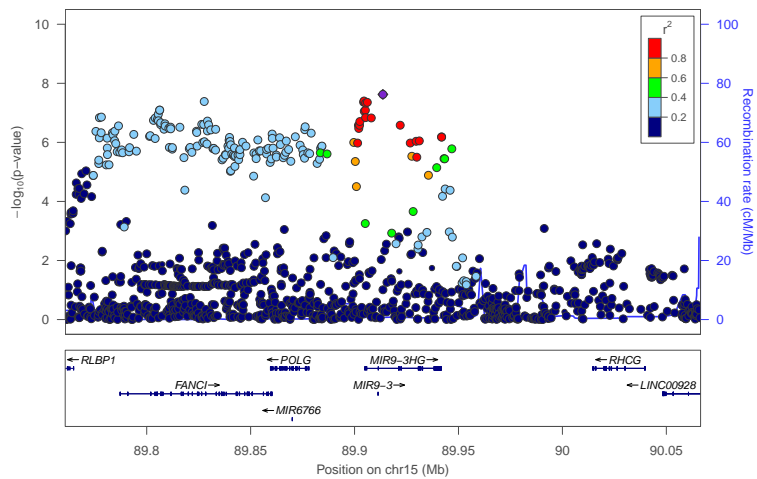

locus 464 rs4702

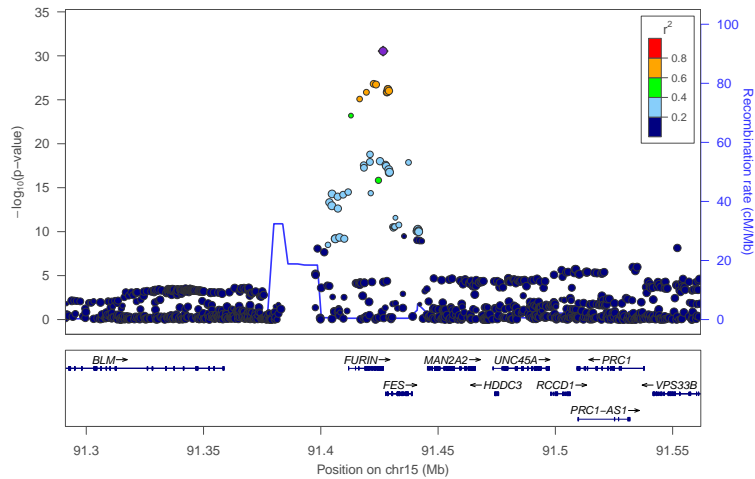

locus 465 rs11858157

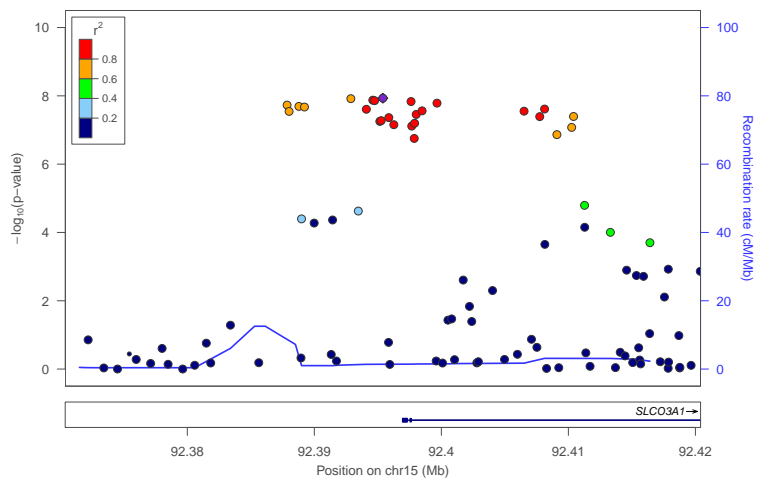

locus 466 rs2575431

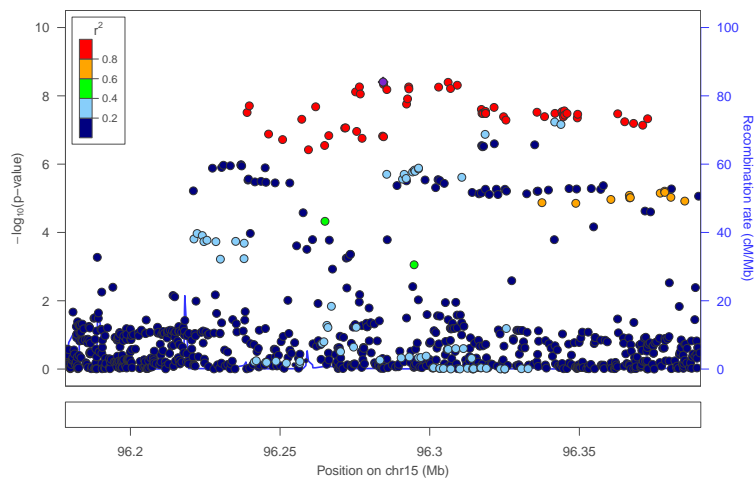

locus 467 rs8026716

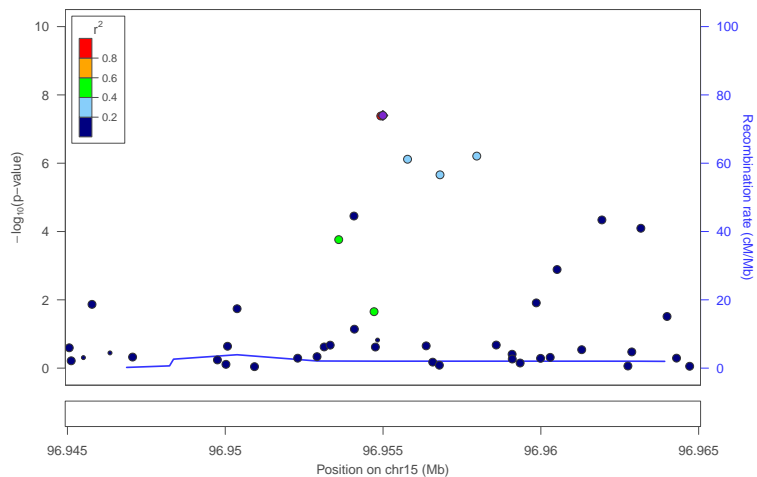

locus 468 rs8028620

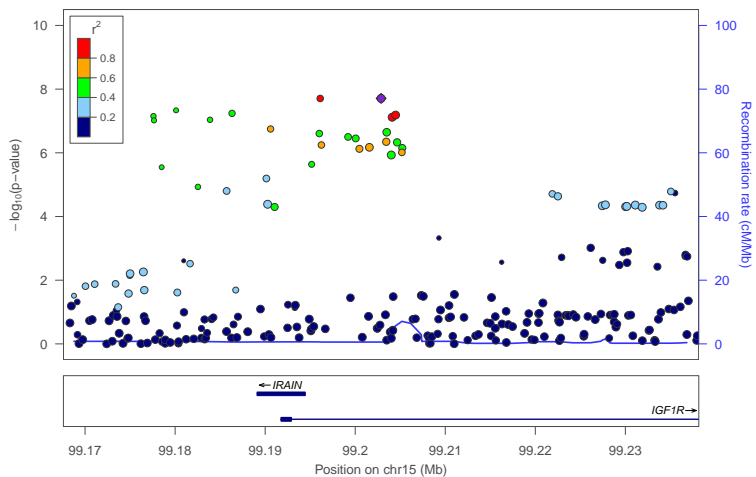

locus 469 rs9936879

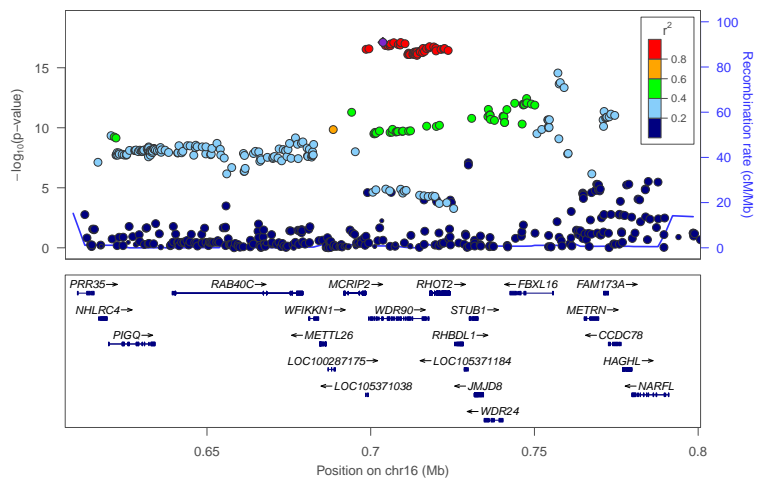

locus 470 rs11461440

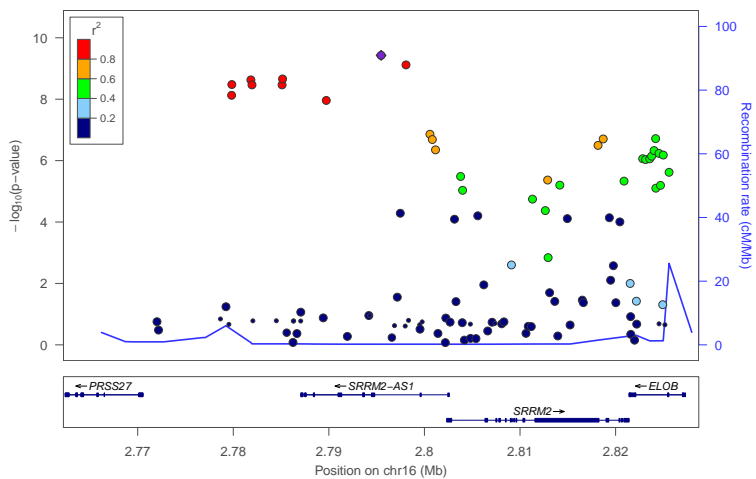

locus 471 rs11077334

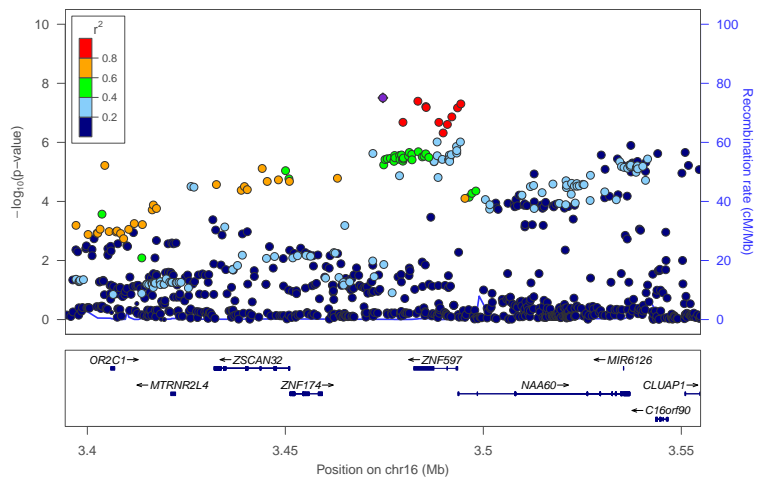

locus 472 rs12928387

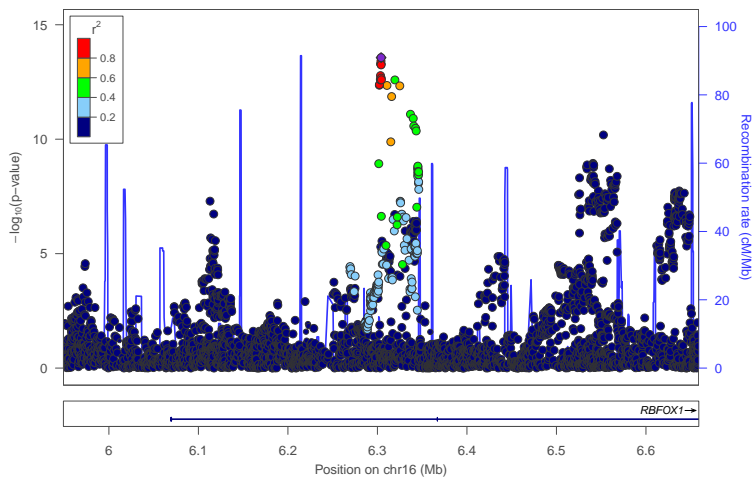

locus 473 rs12924275

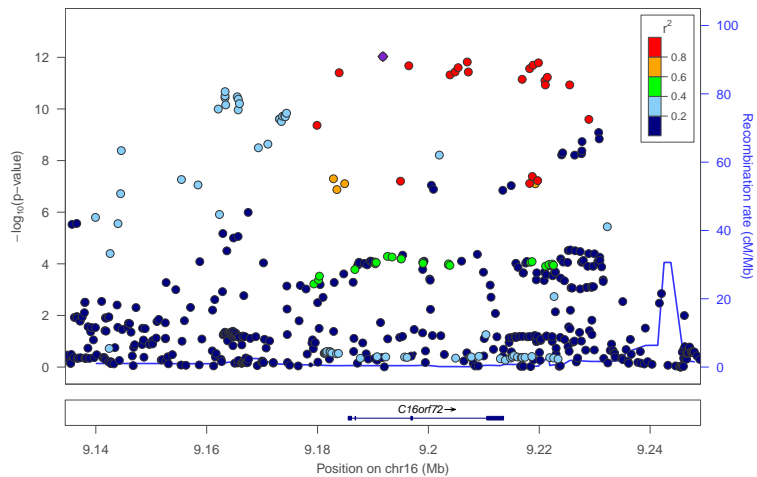

locus 474 rs111505982

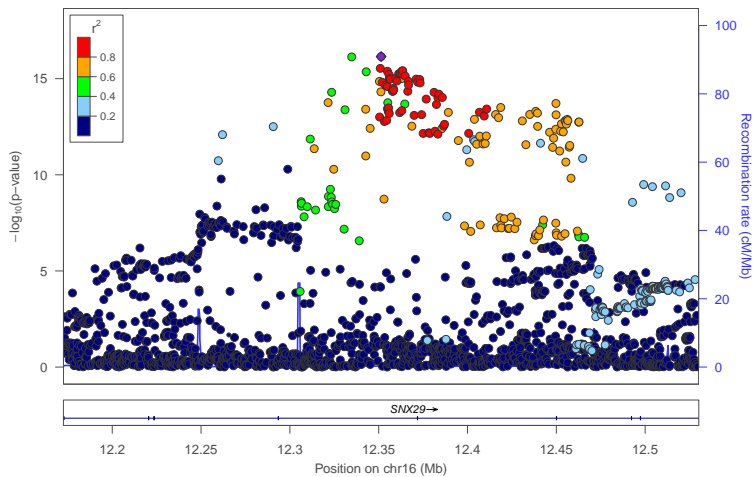

locus 475 rs111536178

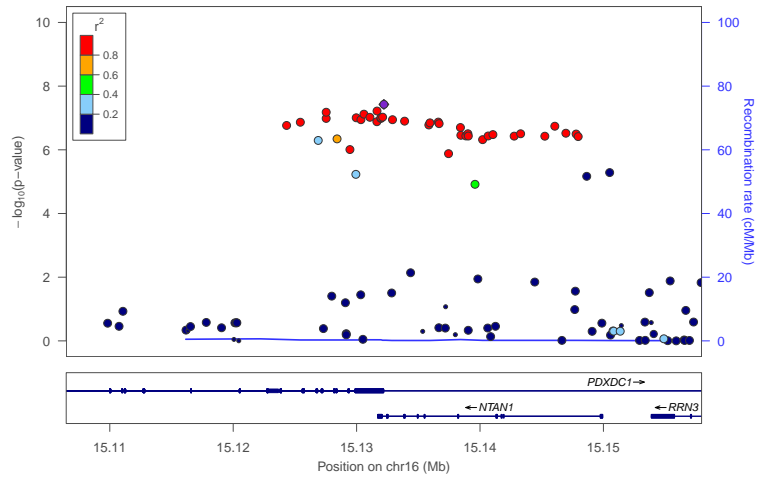

locus 476 rs8054082

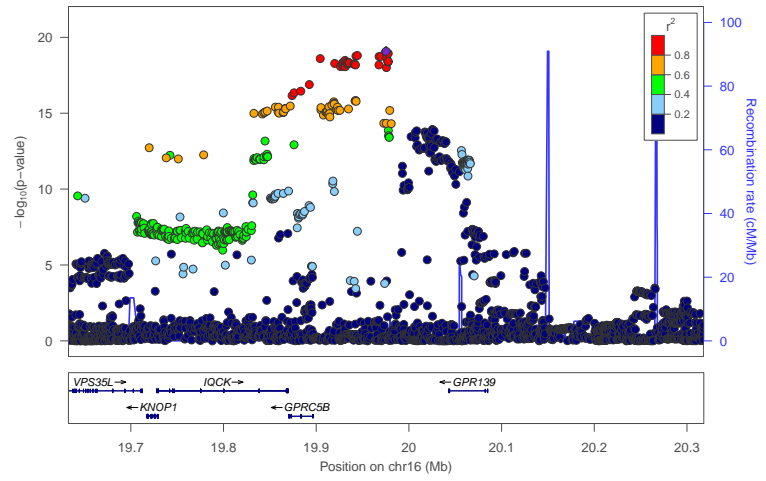

locus 477 rs148514776

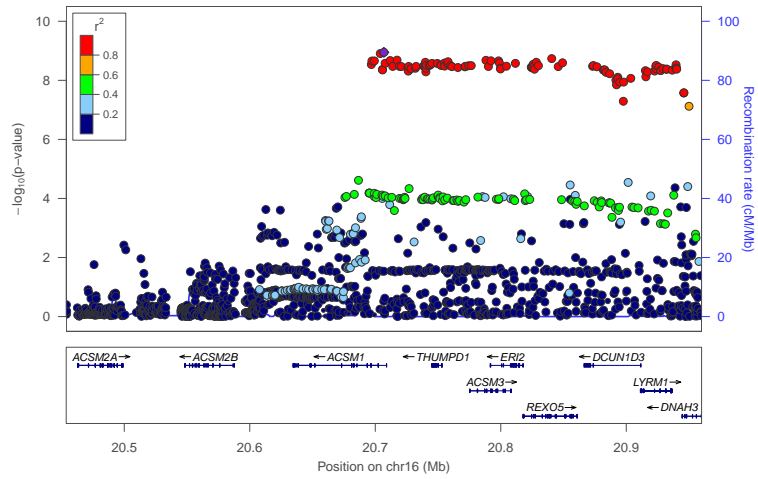

locus 478 rs3814883

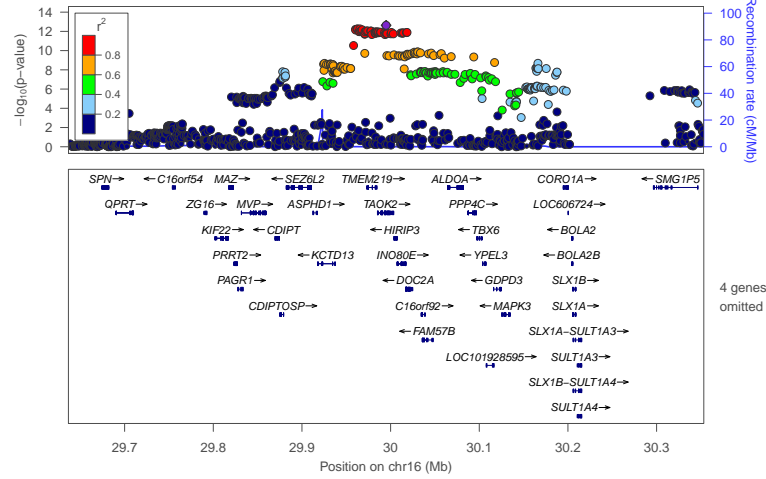

locus 479 rs2356265

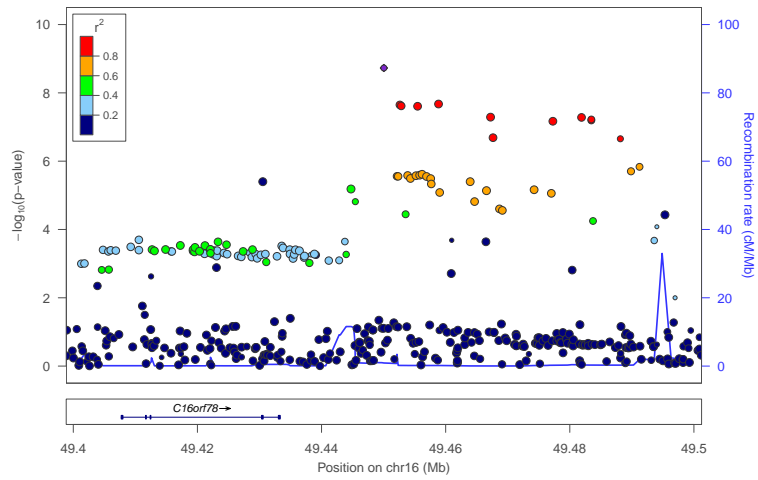

locus 480 rs1015438

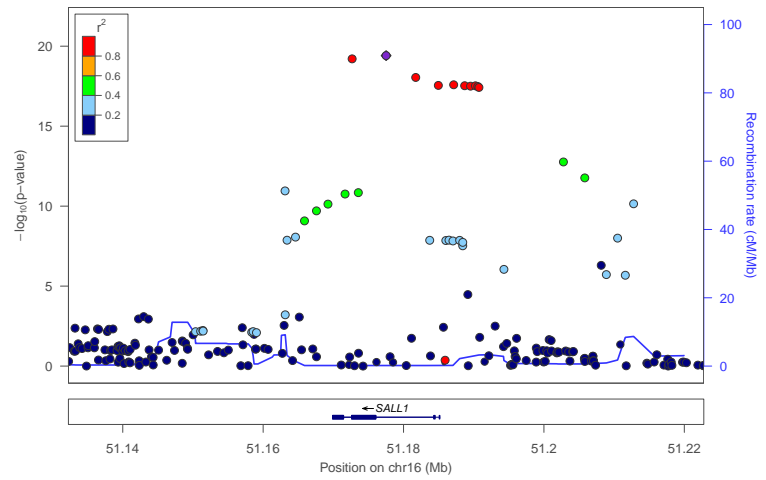

locus 481 rs59937052

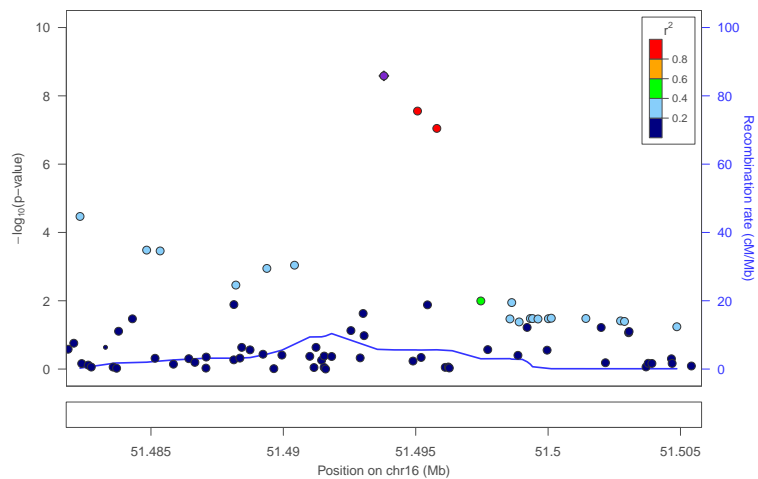

locus 482 rs12927162

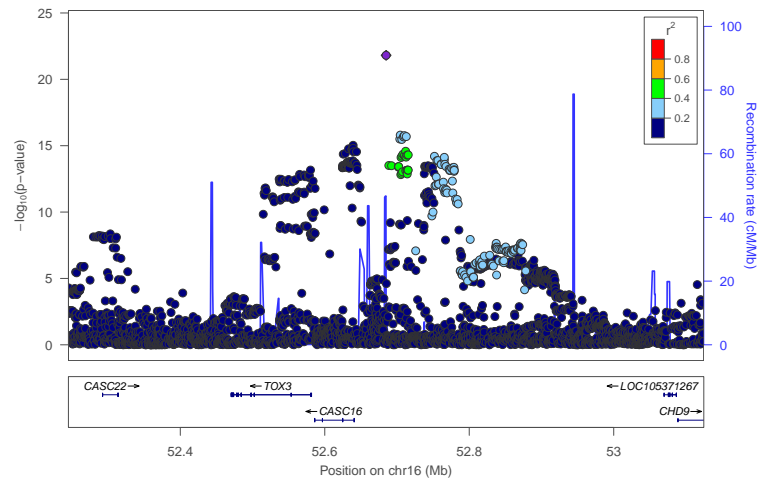



locus 483 rs1548911

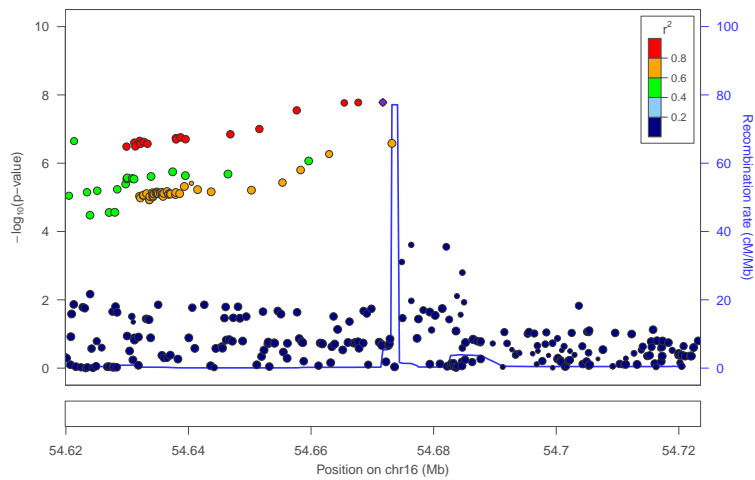

locus 484 rs2398144

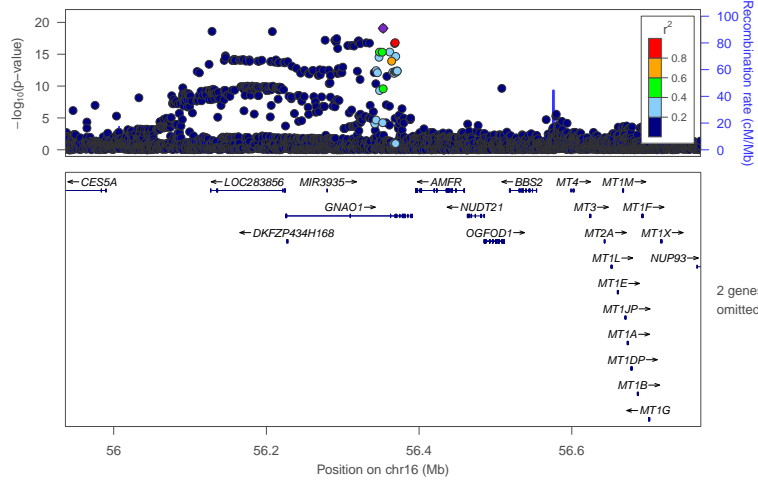

locus 485 rs34160647

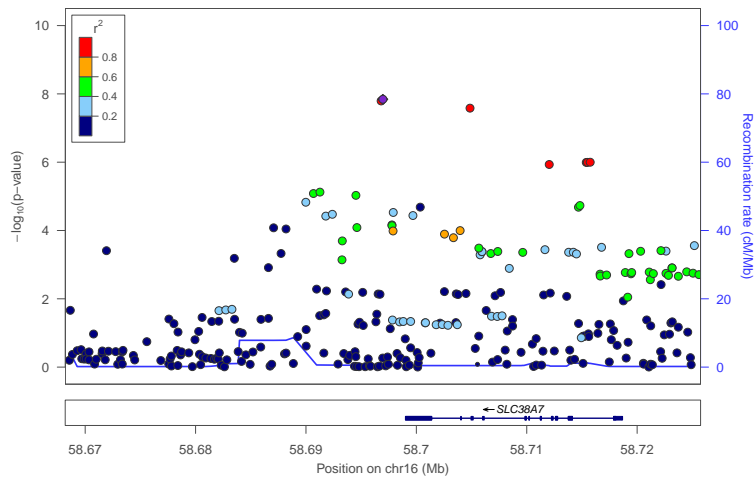

locus 486 rs7203385

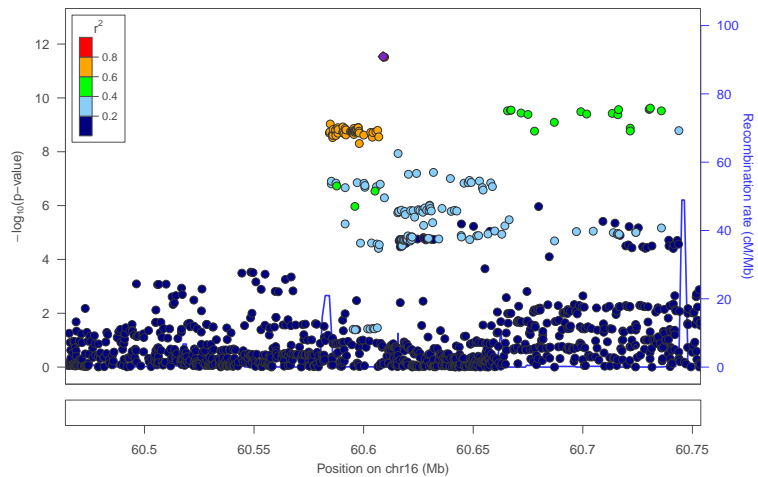

locus 487 rs11863753

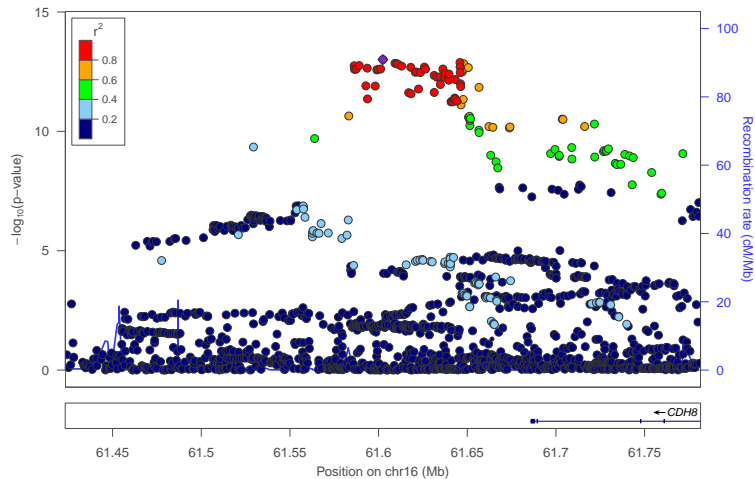

locus 488 rs12598089

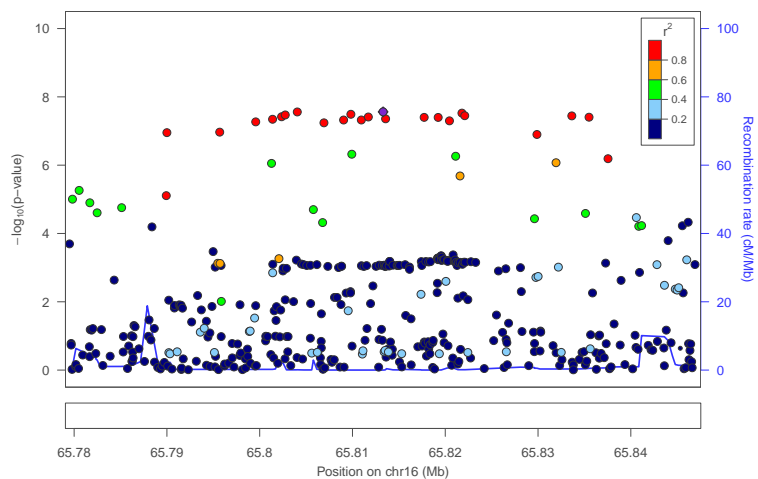

locus 489 rs9926159

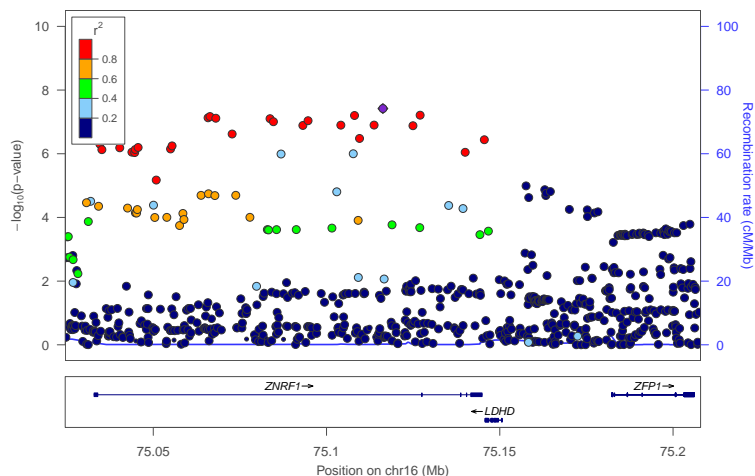

locus 490 rs7184998

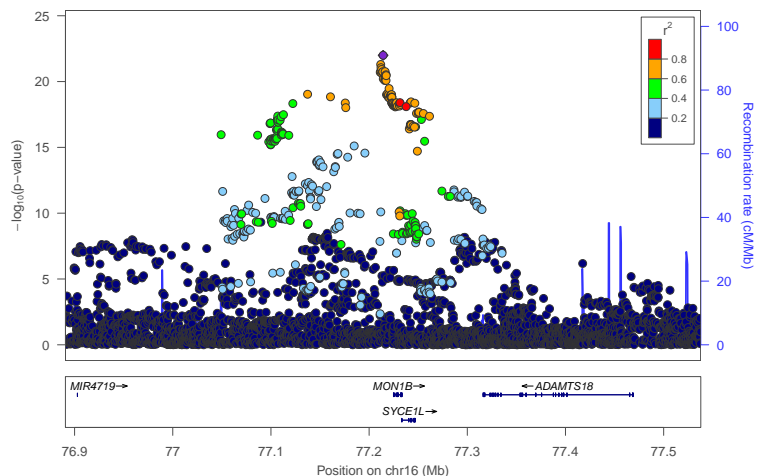

locus 491 rs79637296

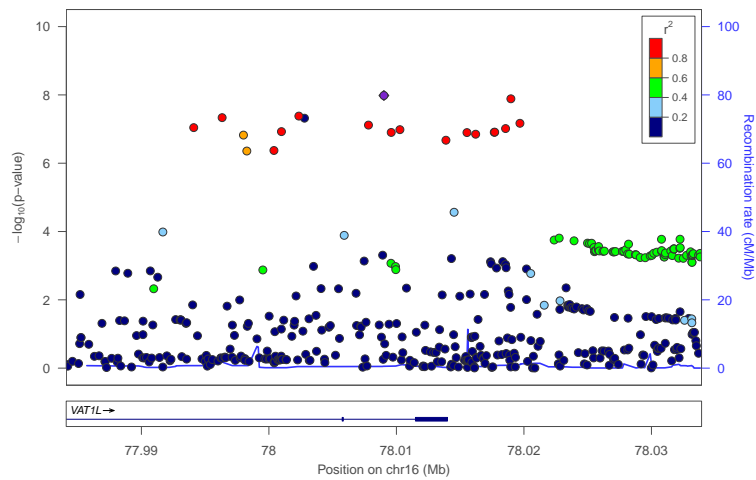

locus 492 rs11150494

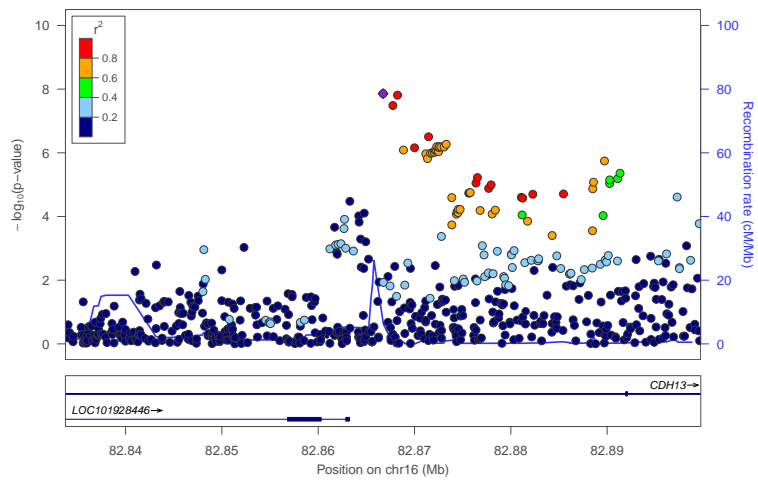

locus 493 rs8063871

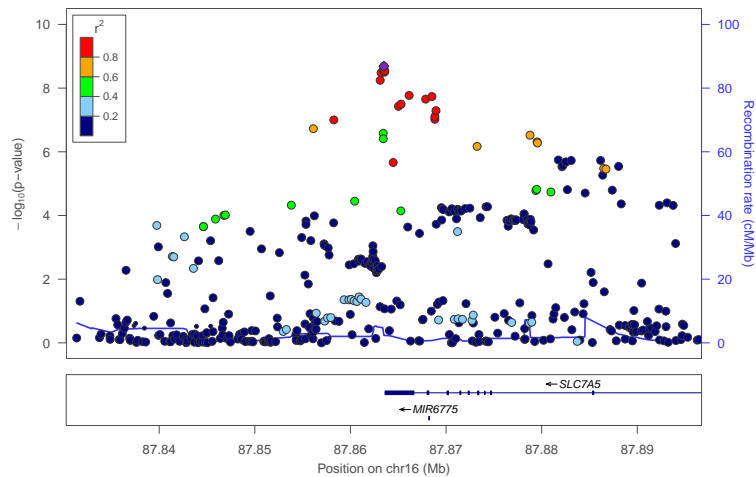

locus 494 rs8069356

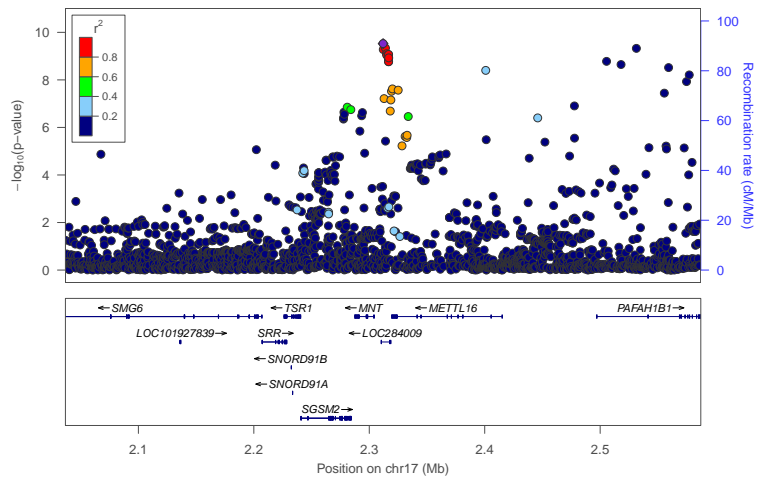

locus 495 rs8066969

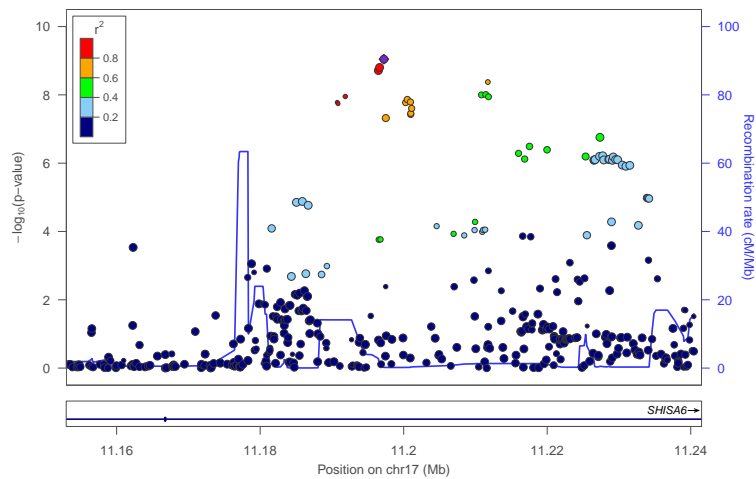

locus 496 rs2232839

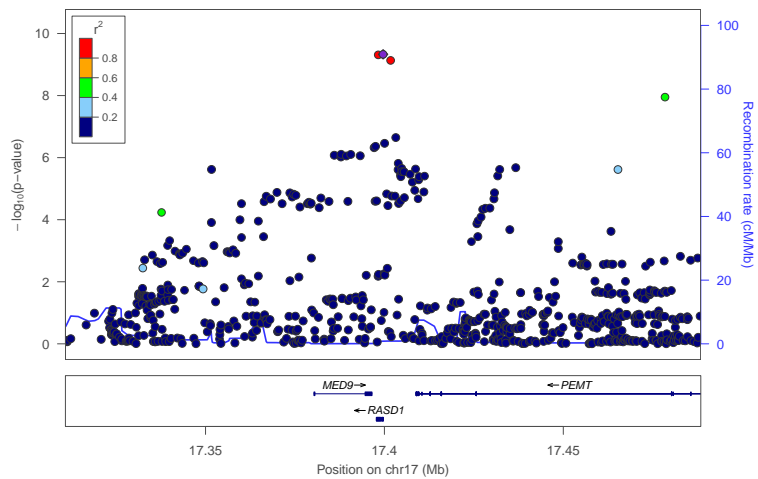

locus 497 rs34490907

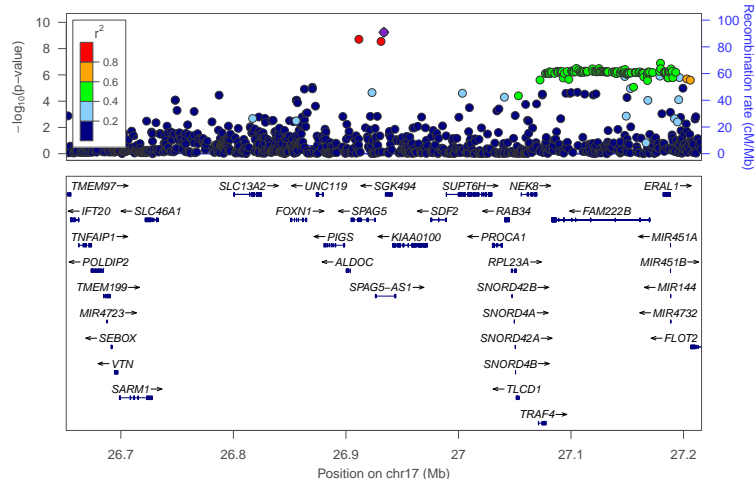

locus 498 rs8076005

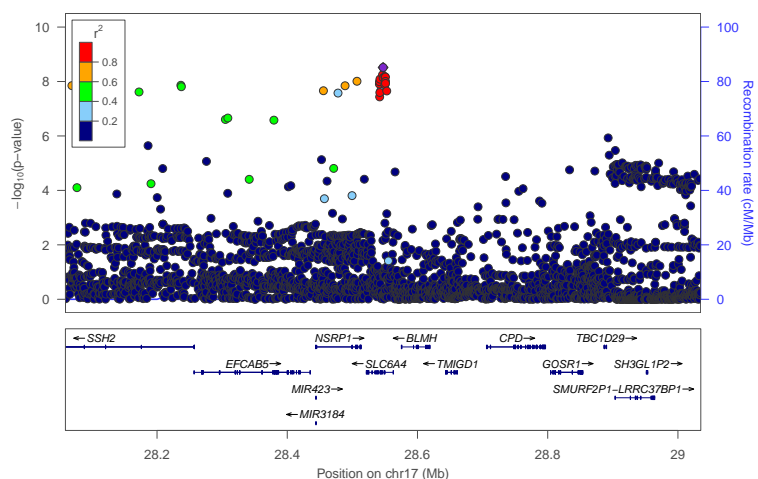

locus 499 rs3815156

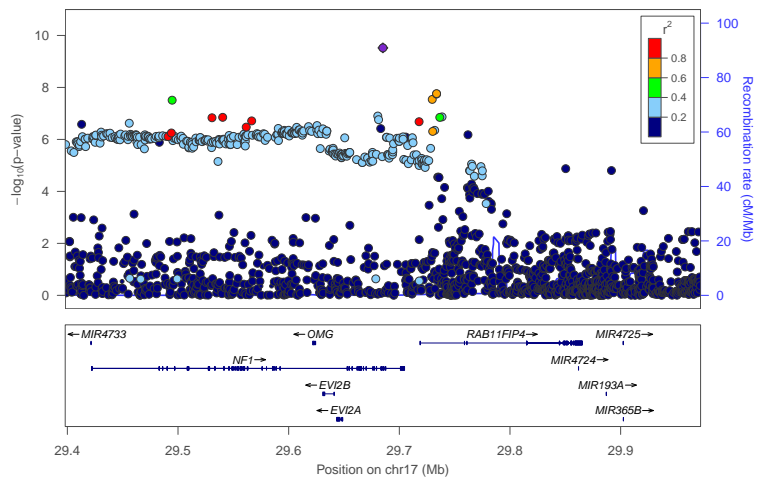

locus 500 rs12947676

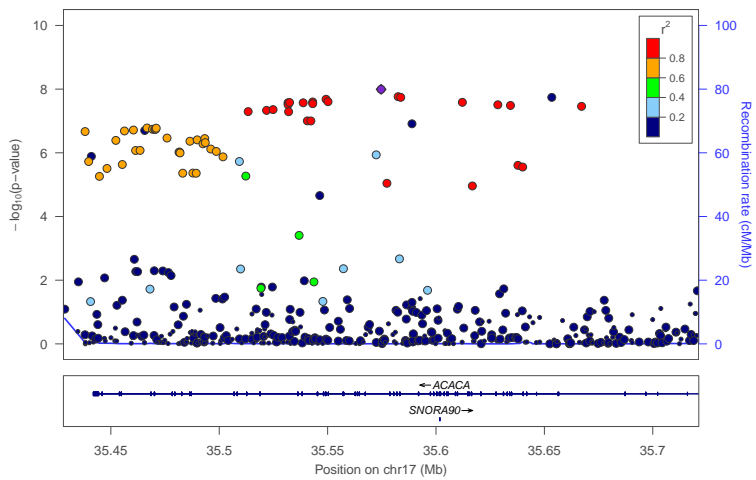

locus 501 rs11871043

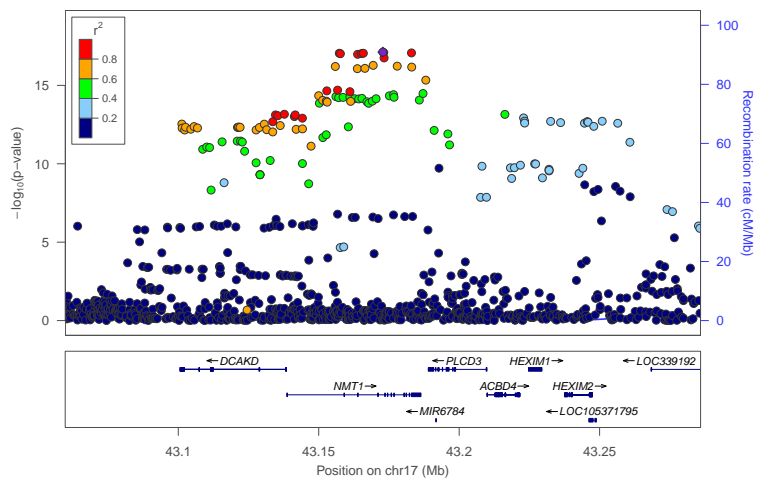

locus 502 rs4643373

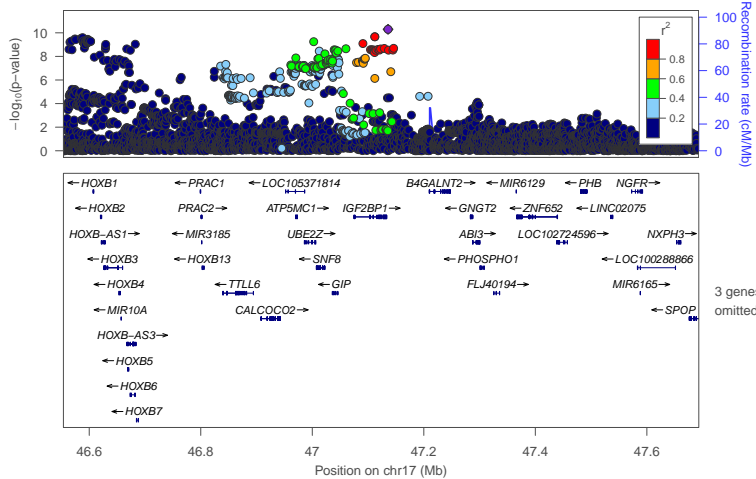

locus 503 rs9889282

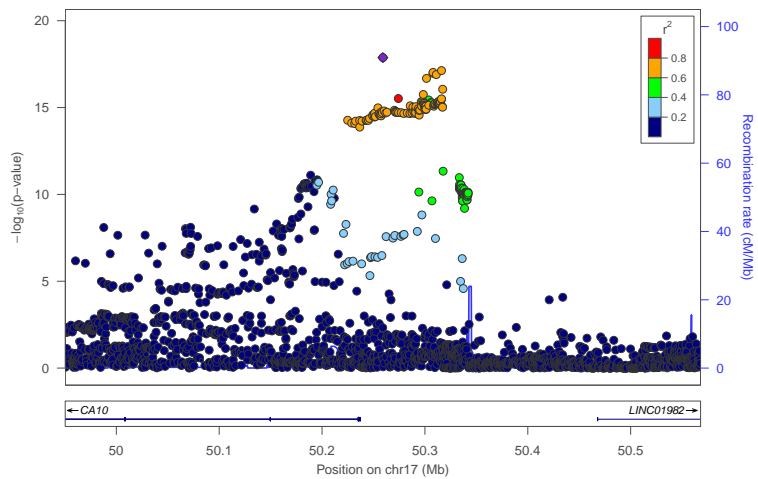

locus 504 rs8076183

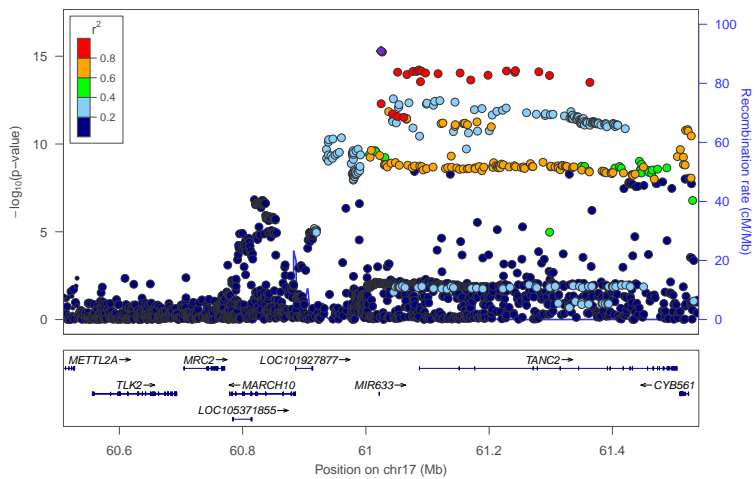

locus 505 rs6504568

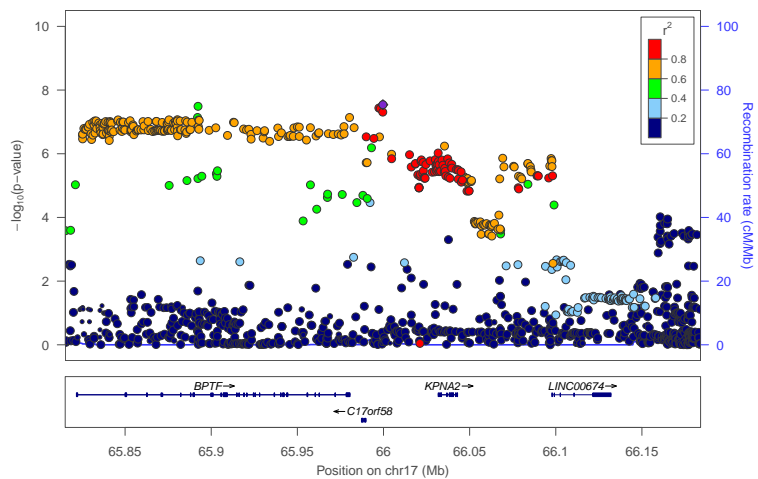

locus 506 rs323406

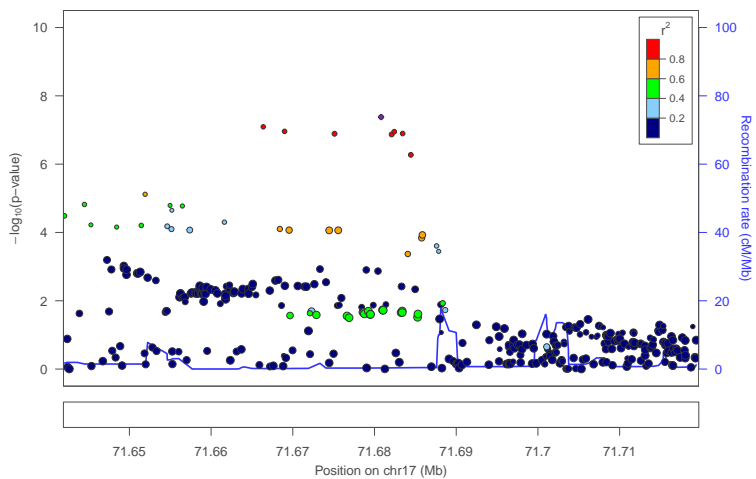

locus 507 rs56324203

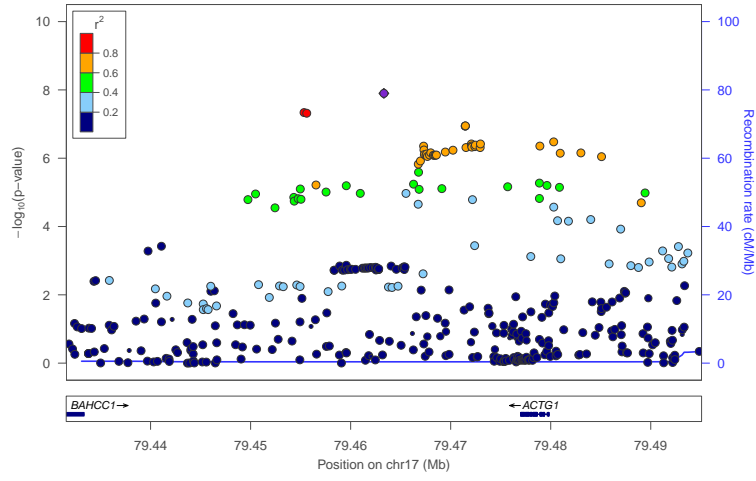

locus 508 rs8074498

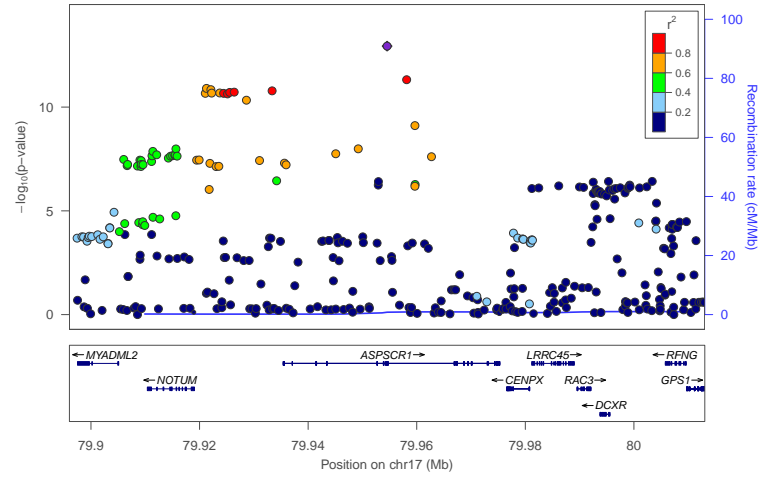

locus 509 rs113722141

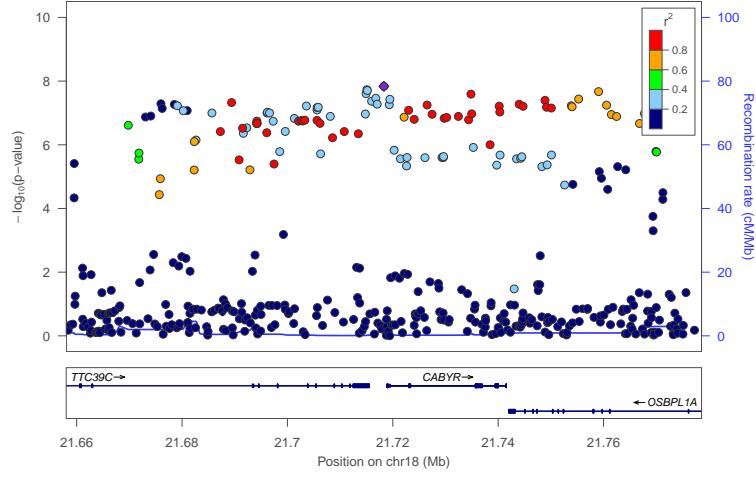

locus 510 rs4432322

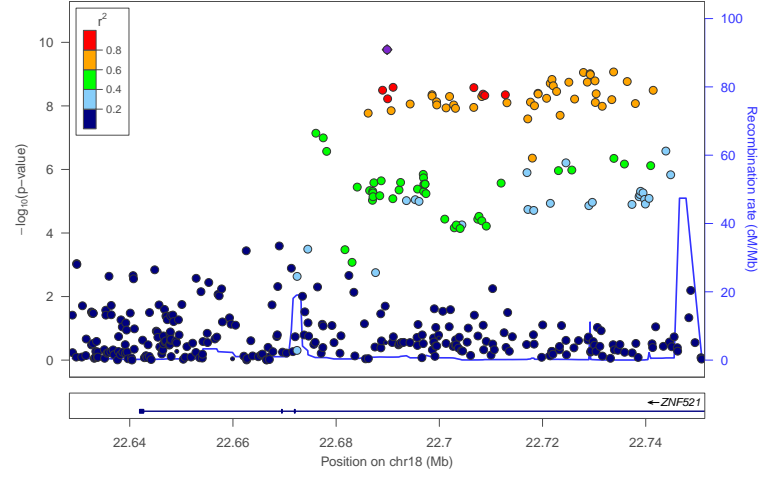

locus 511 rs790316

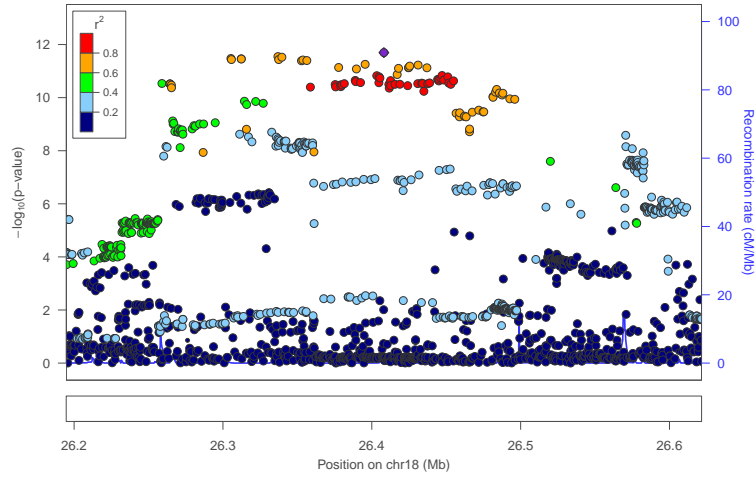

locus 512 rs12605642

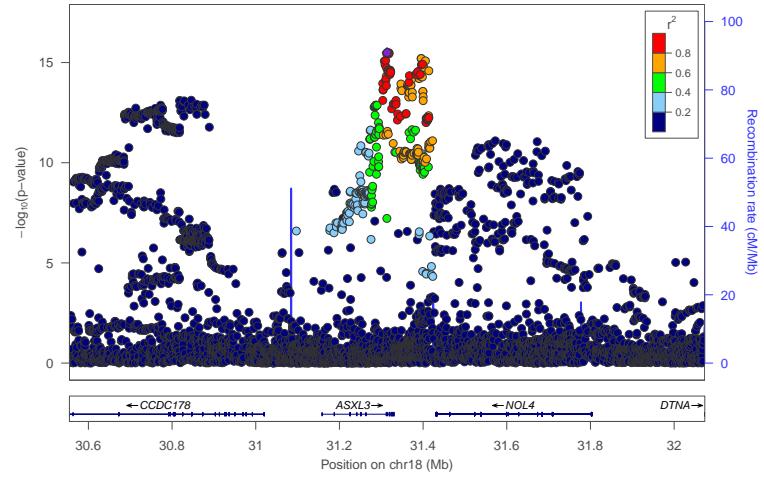

locus 513 rs62092949

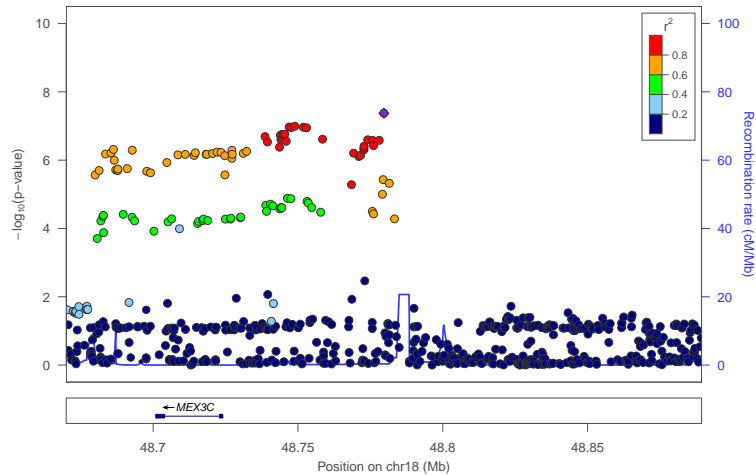

locus 514 rs35541683

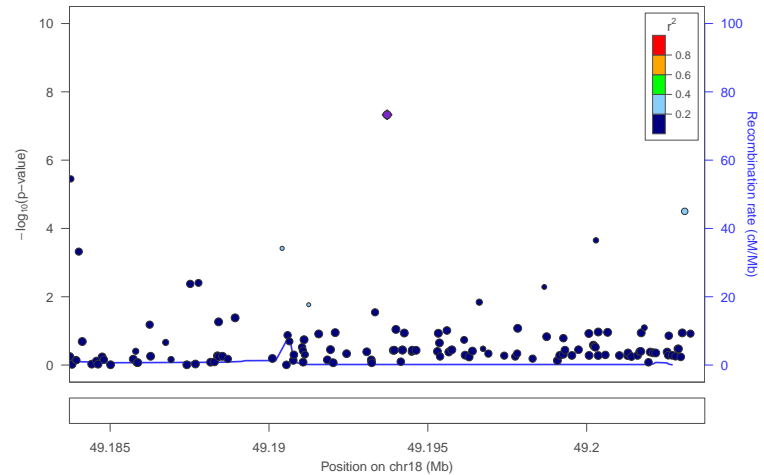



locus 515 rs10502966

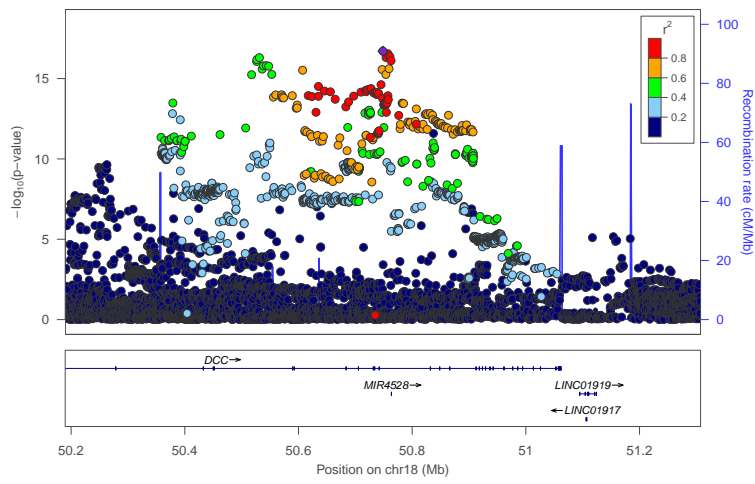

locus 516 rs8766

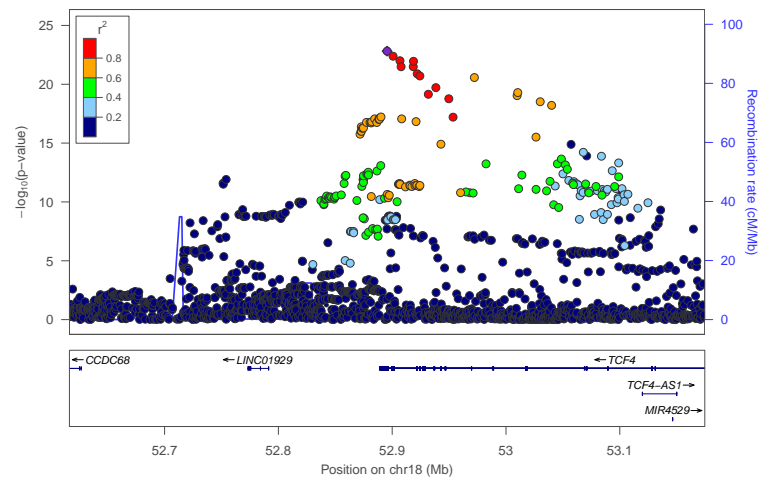

locus 517 rs2271731

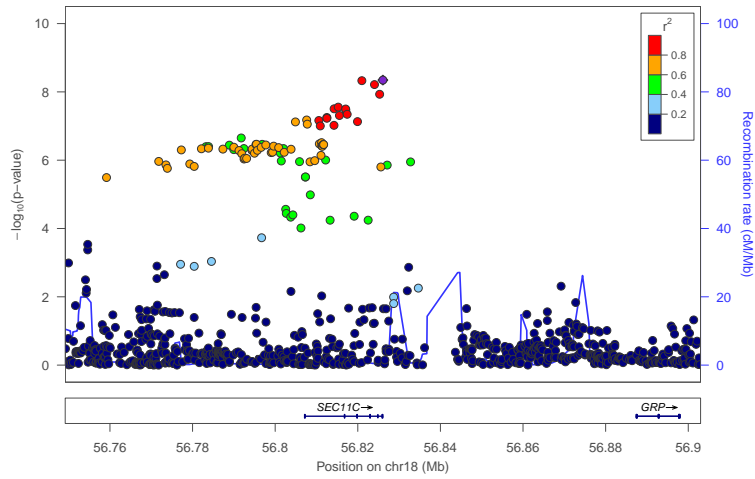

locus 518 rs8084405

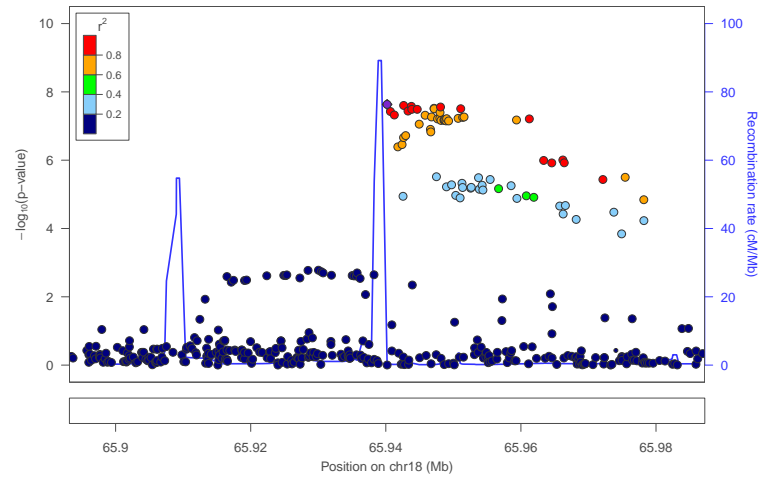

locus 519 rs516890

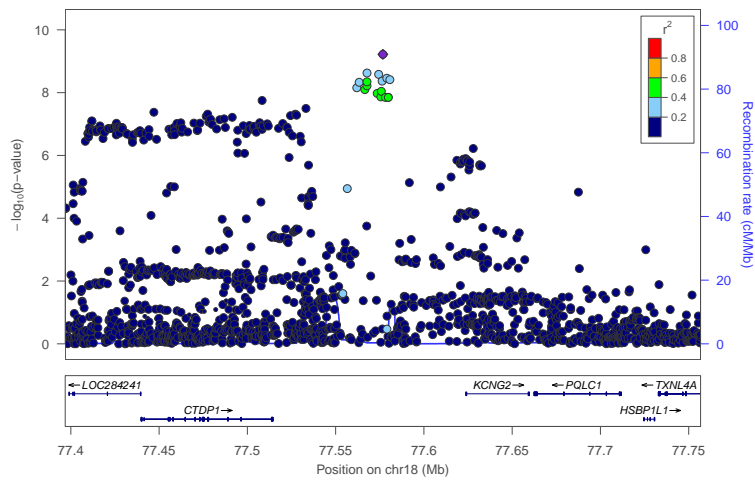

locus 520 rs12983032

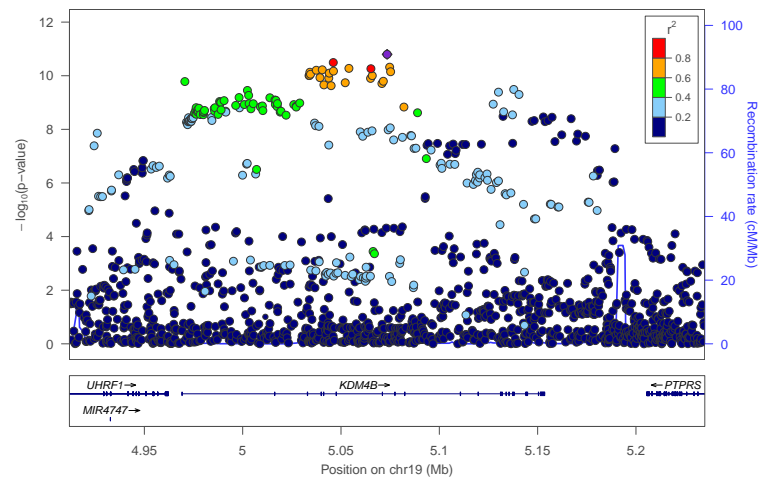

locus 521 rs12611068

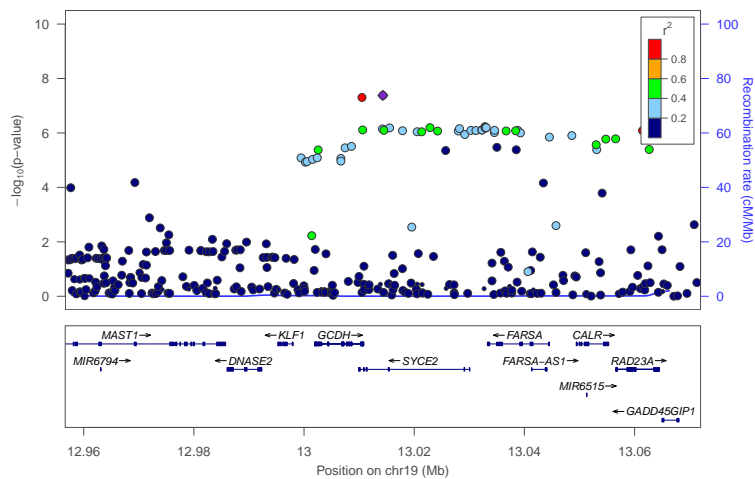

locus 522 rs12973258

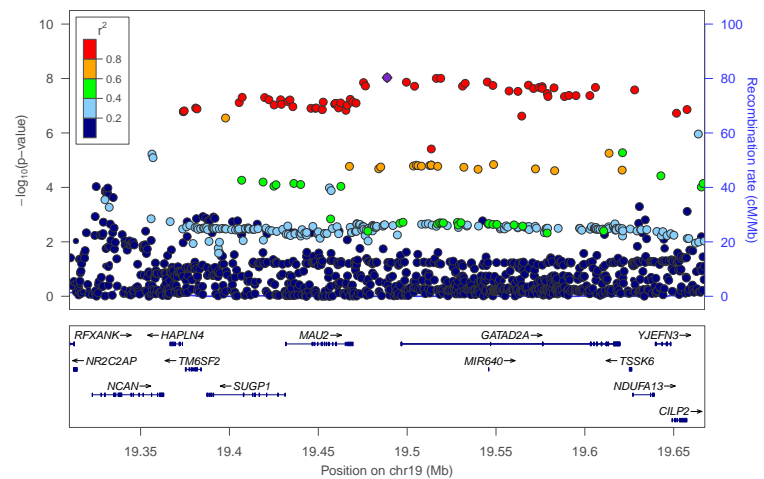

locus 523 rs11375063

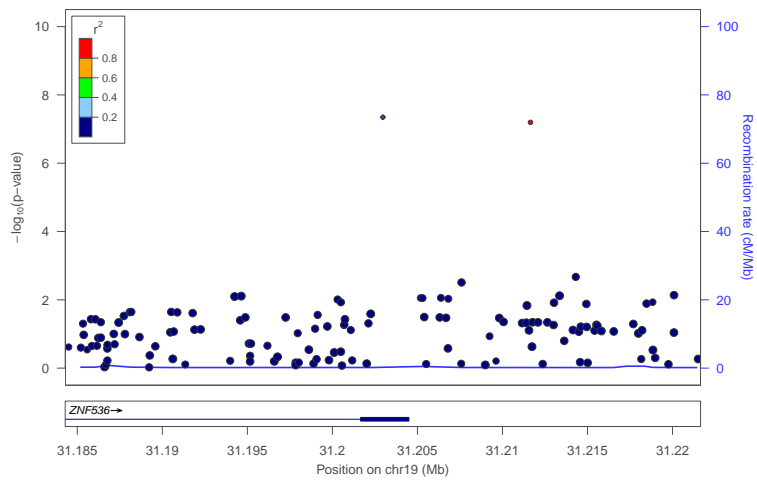

locus 524 rs10421599

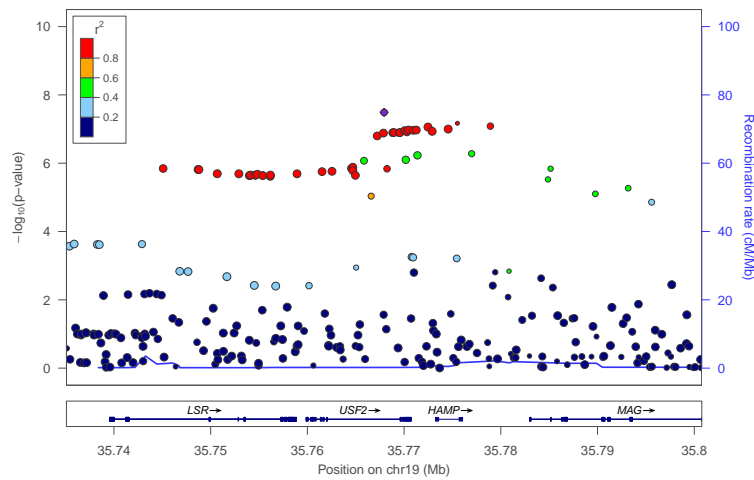

locus 525 rs73034109

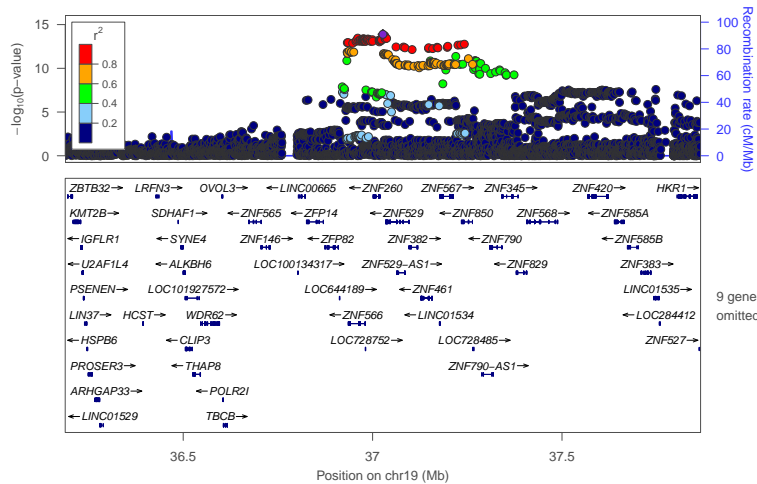

locus 526 rs4803217

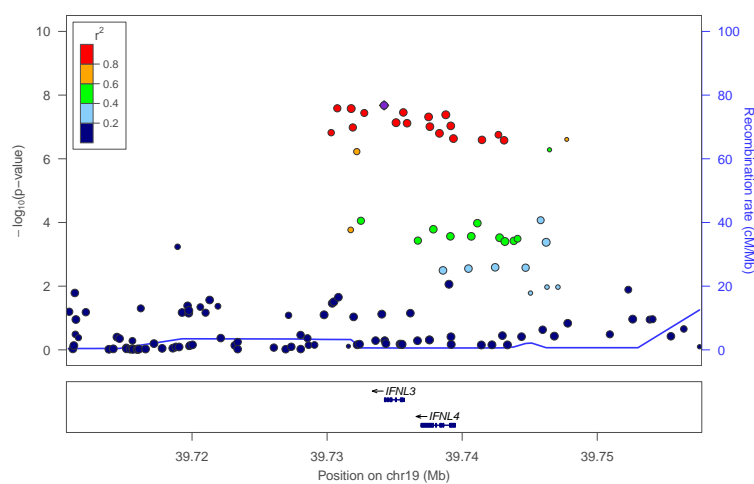

locus 527 rs429358

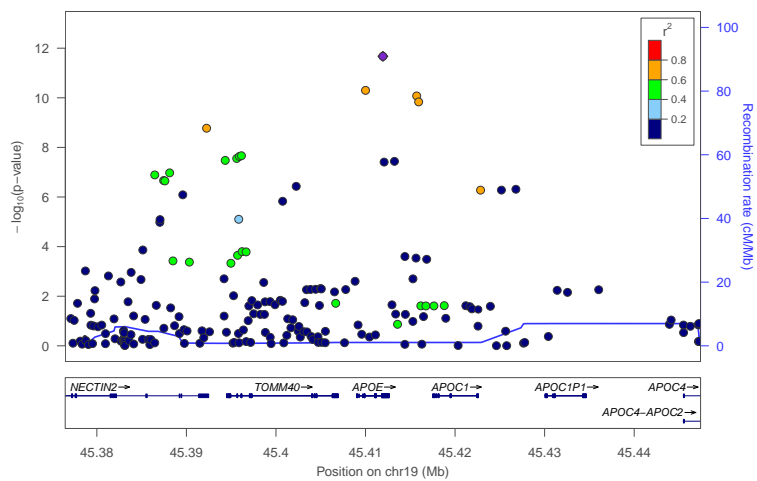

locus 529 rs57314044

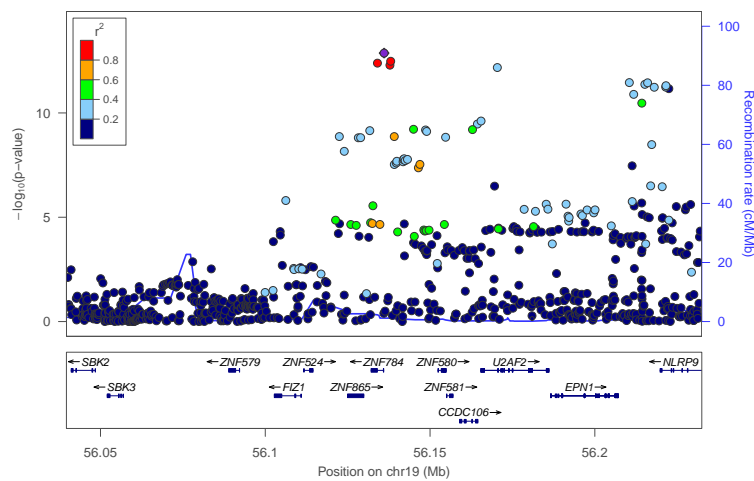

locus 530 rs8110135

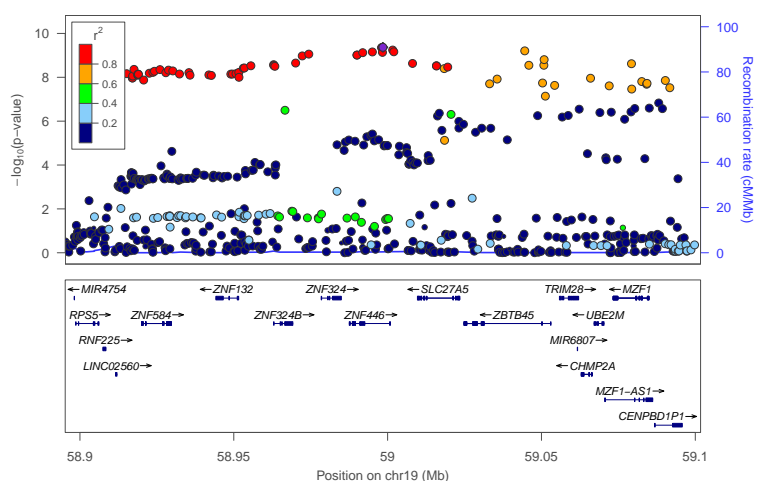

locus 531 rs56353032

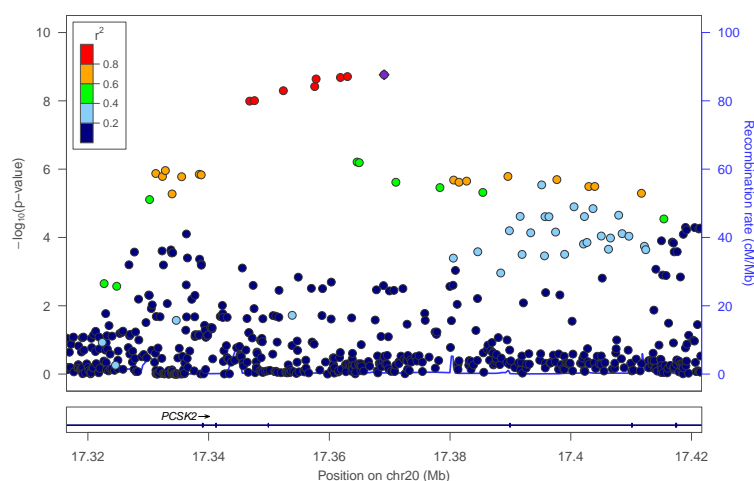

locus 532 rs6035826

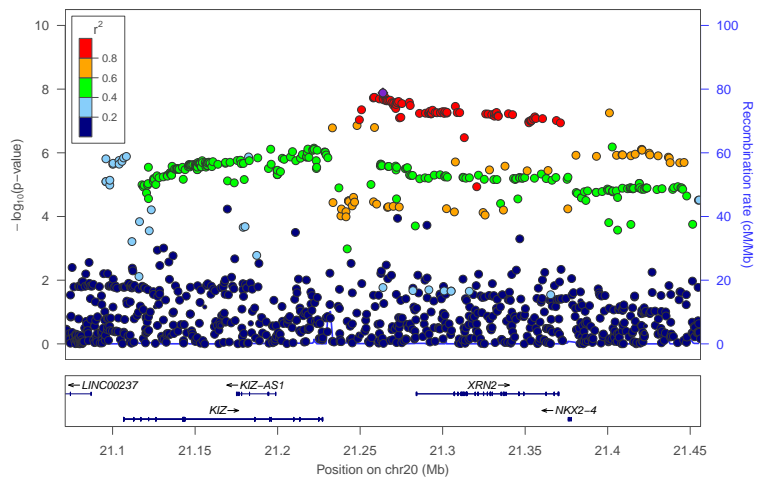

locus 533 rs760997

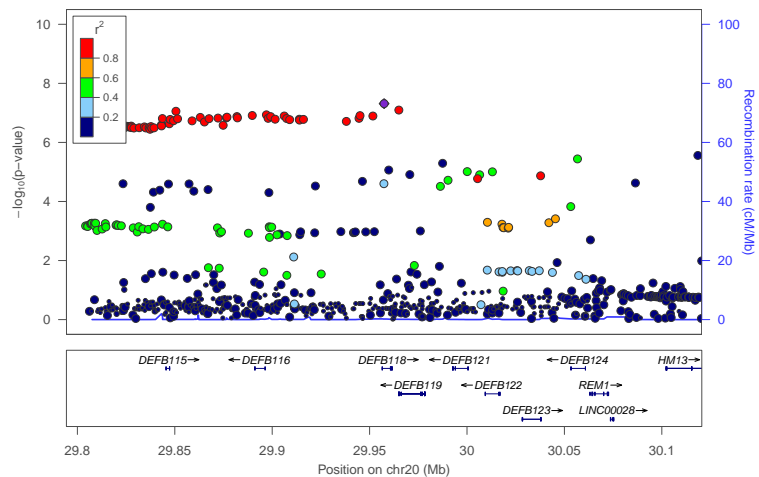

locus 534 rs293567

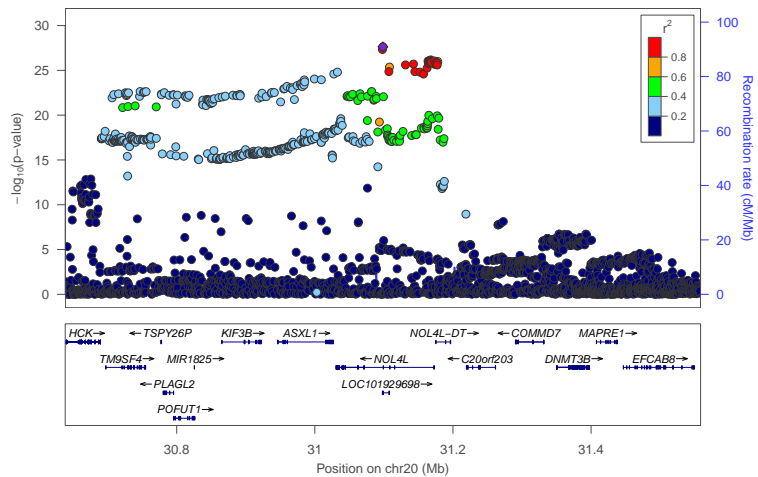

locus 535 rs13038787

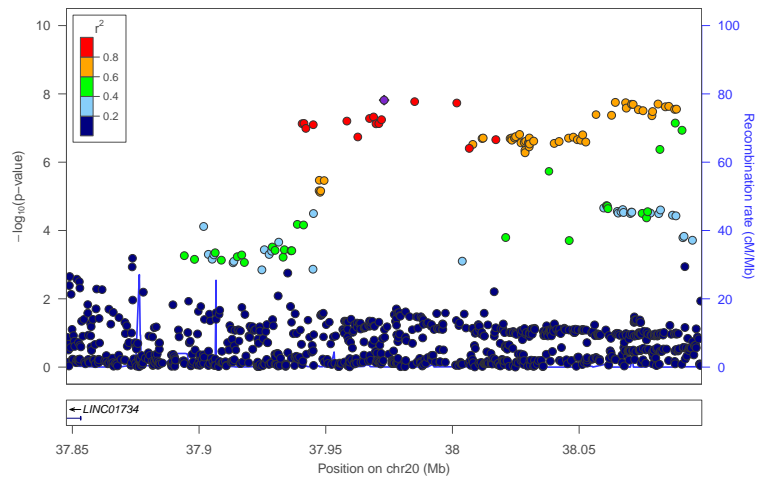

locus 536 rs6030790

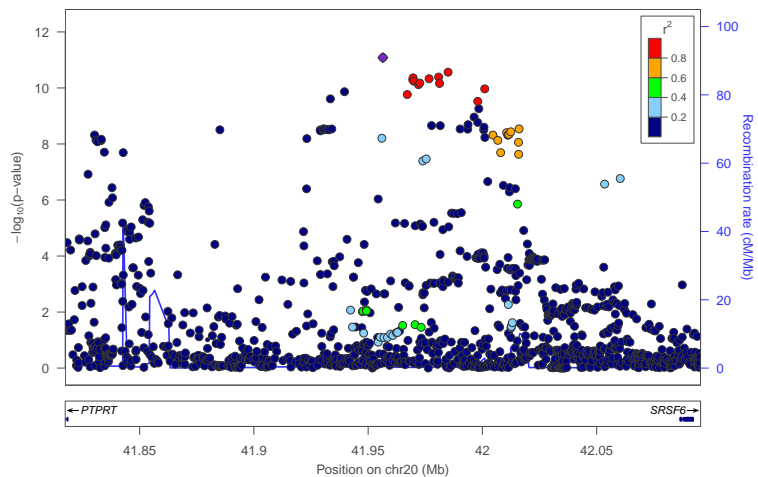

locus 537 rs1883832

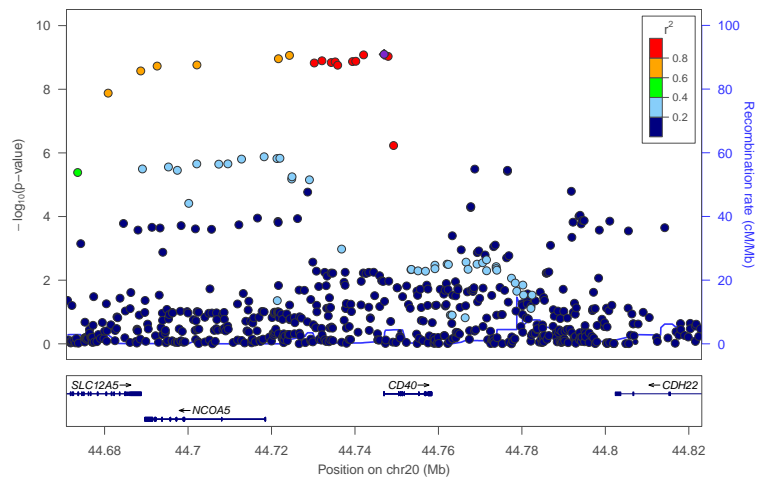

locus 538 rs910187

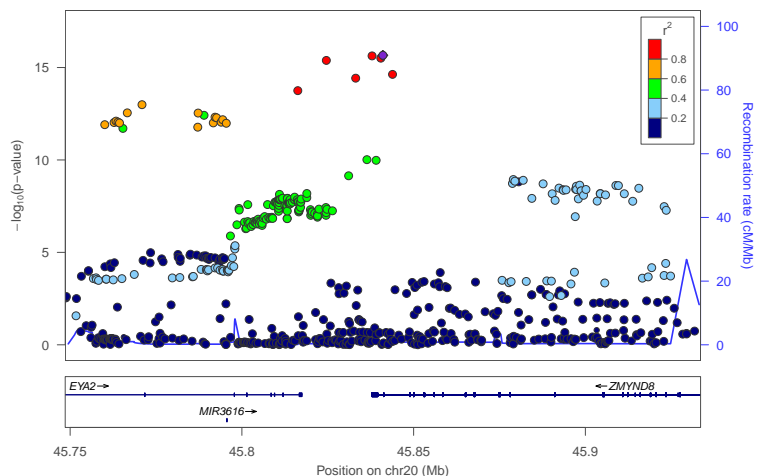

locus 539 rs6019663

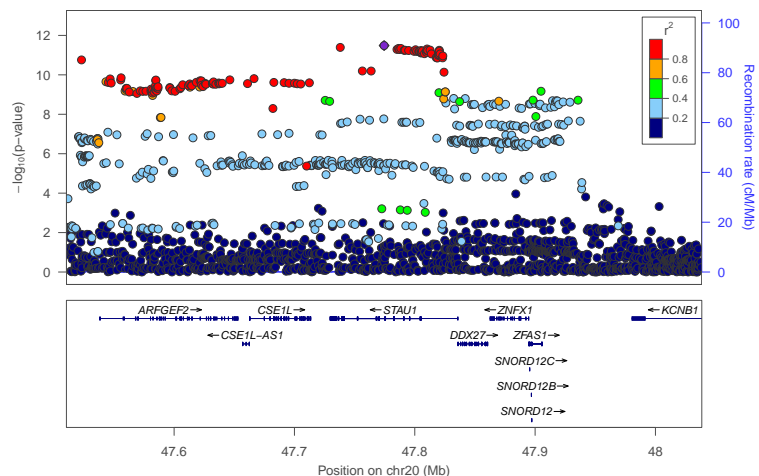

locus 540 rs13037010

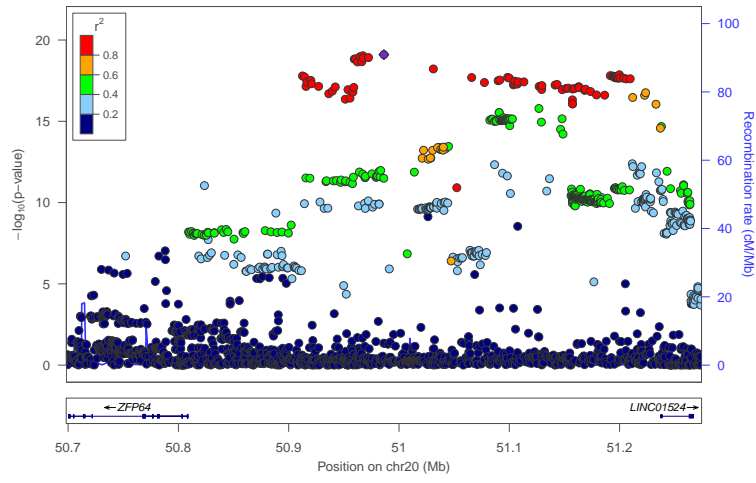

locus 541 rs6024441

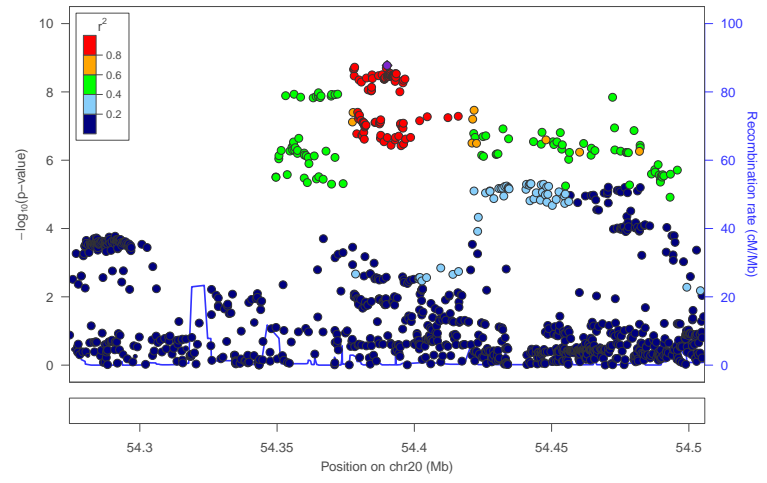

locus 542 rs2236202

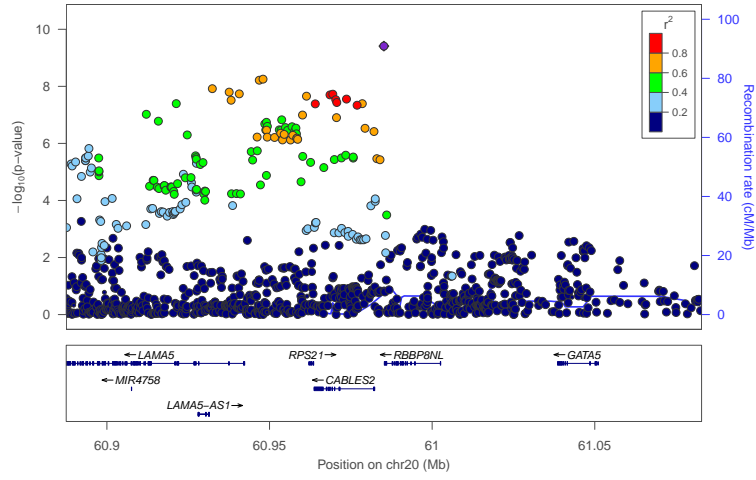

locus 543 rs67047102

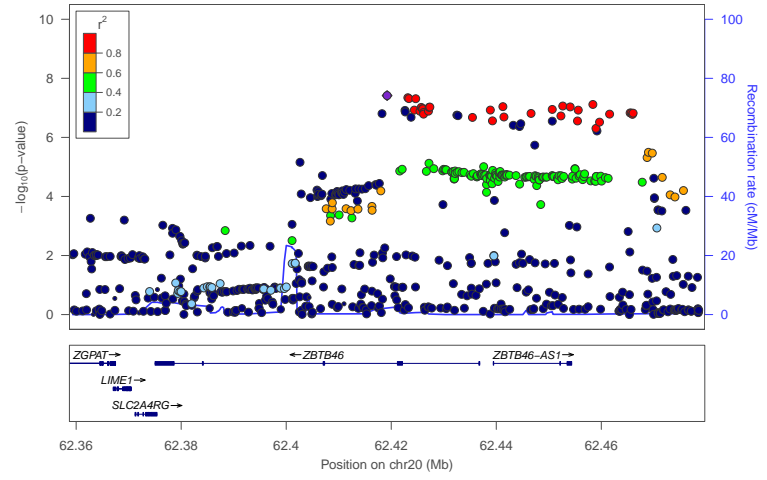

locus 544 rs965494

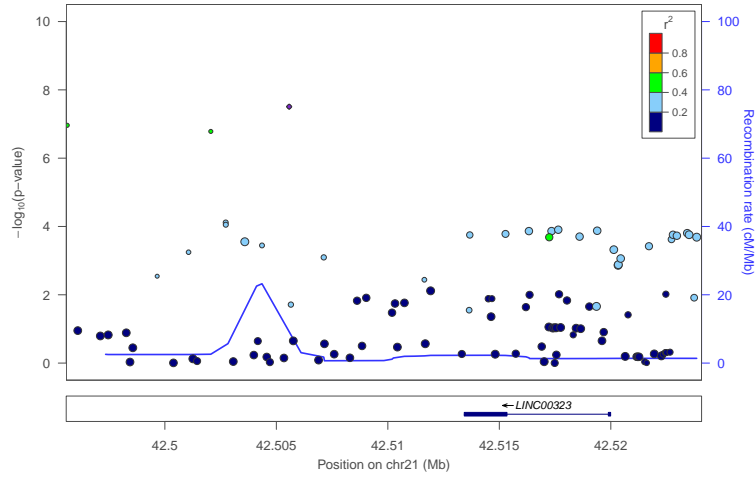

locus 545 rs10368

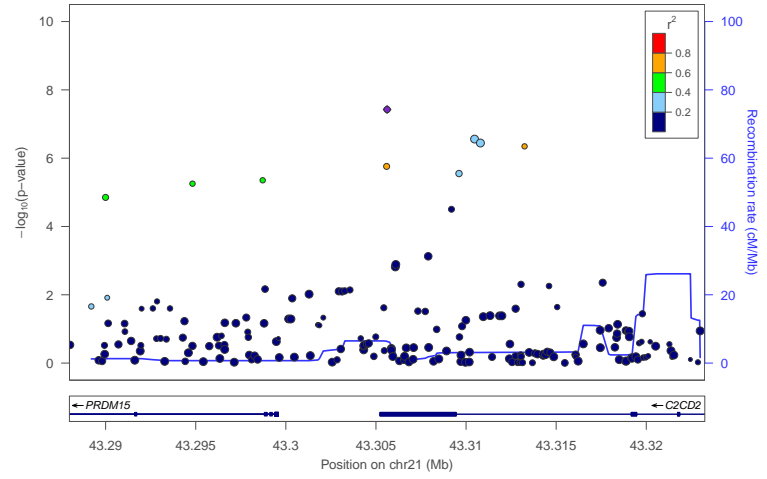

locus 546 rs2003273

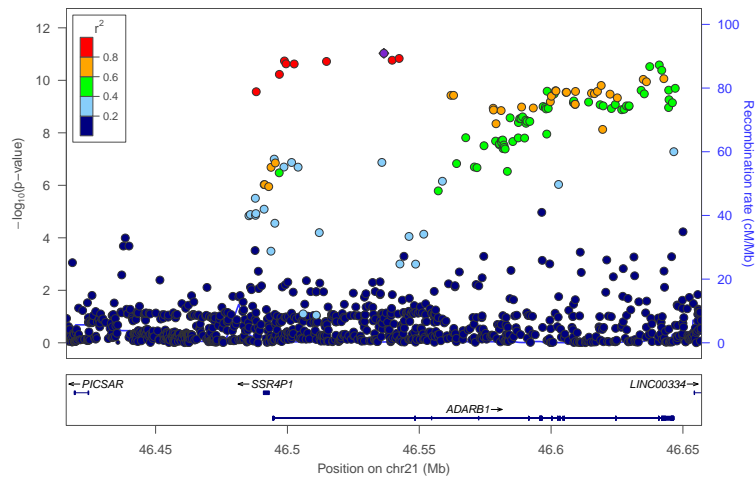

locus 547 rs147970828

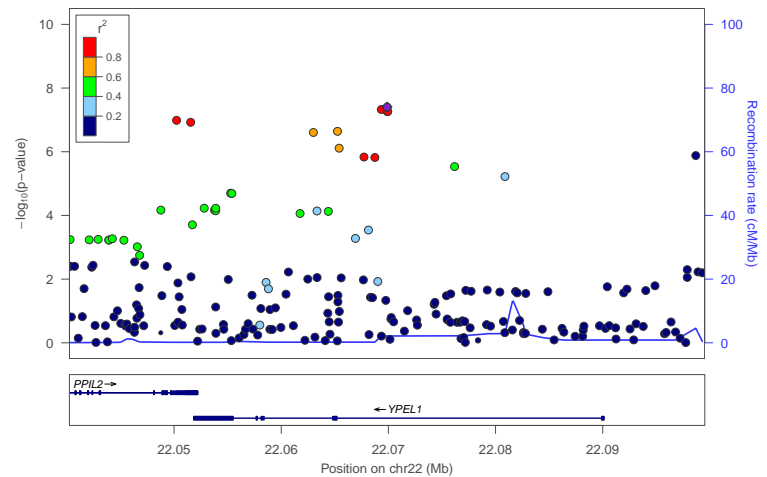



locus 548 rs136310

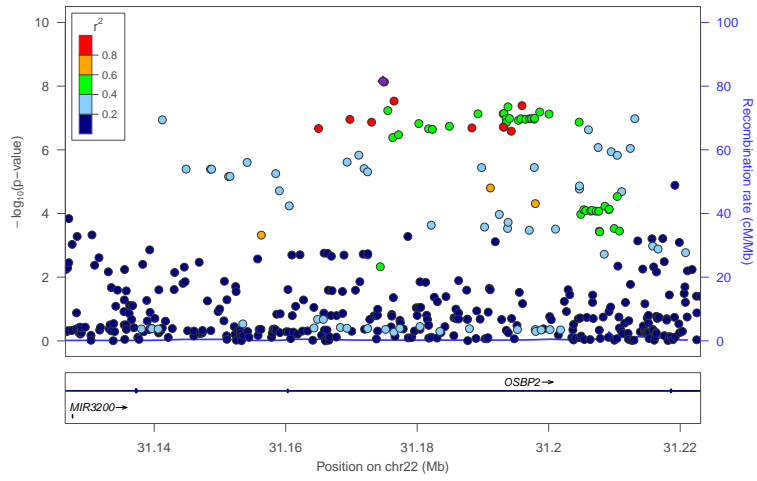

locus 549 rs9607581

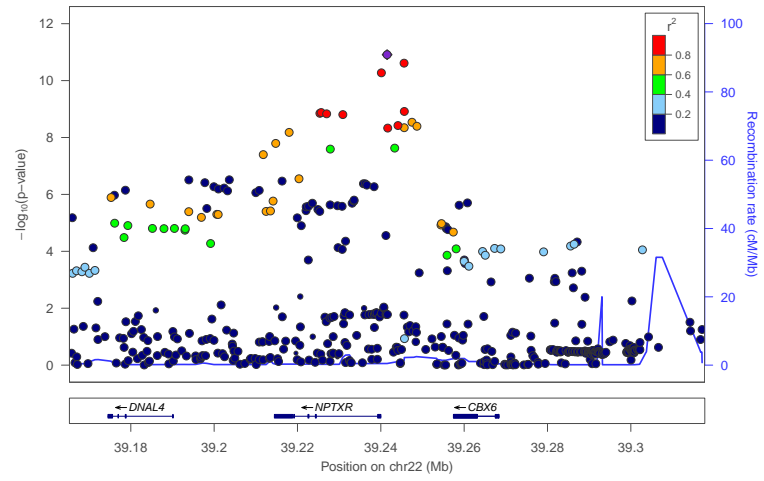

locus 550 rs145611631

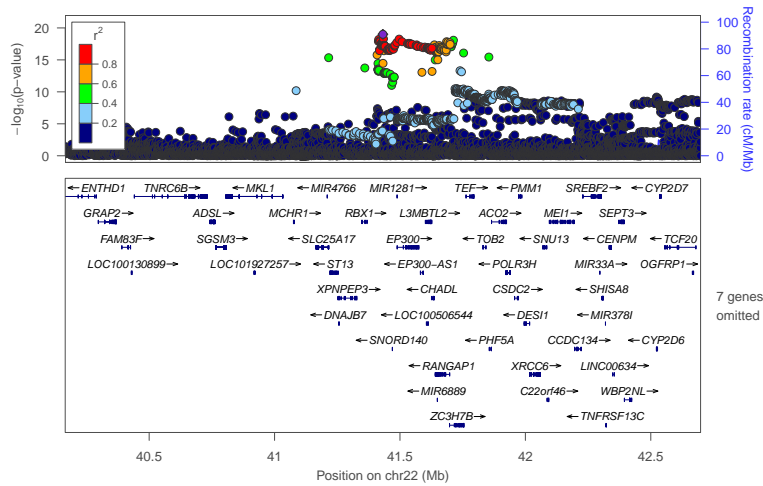

locus 551 rs12010000

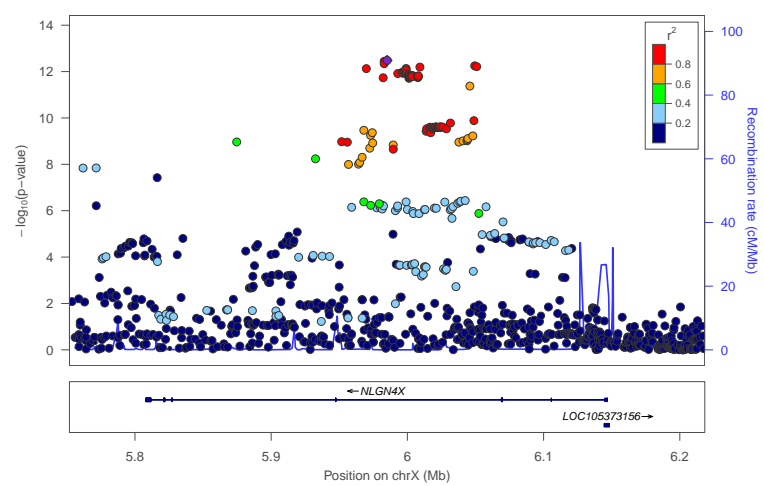

locus 552 rs62590551

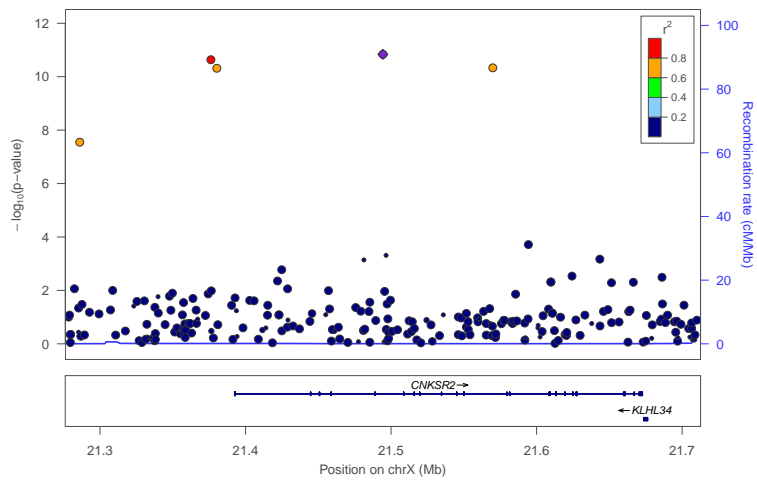

locus 553 rs6629928

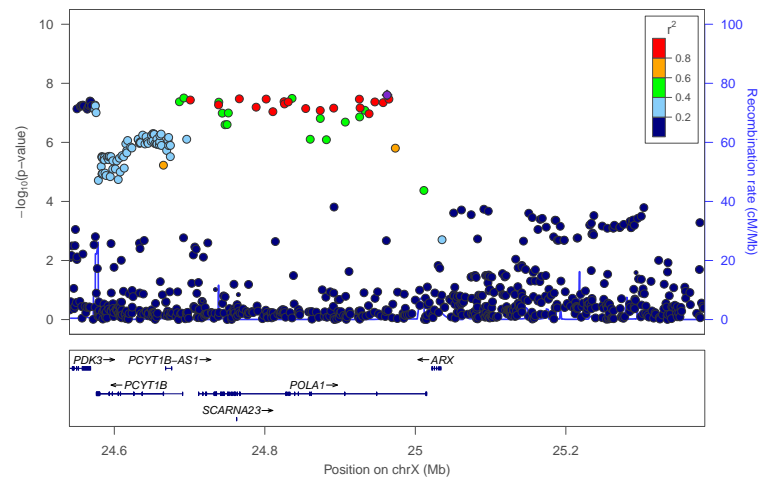

locus 555 rs4828253

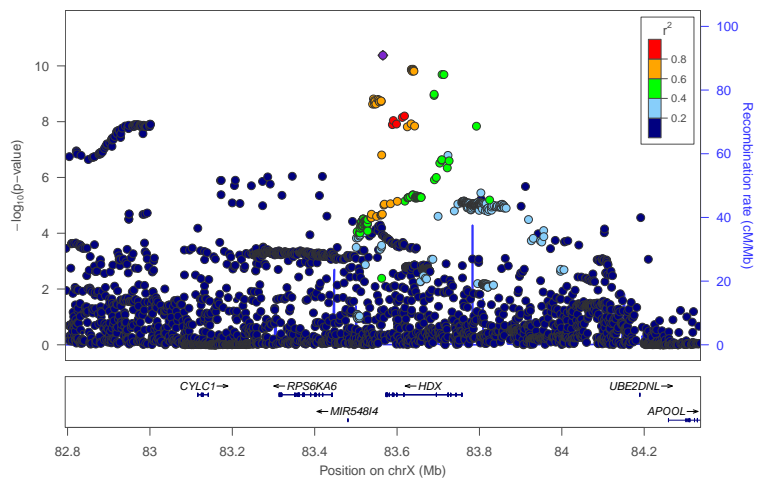

locus 556 rs5932880

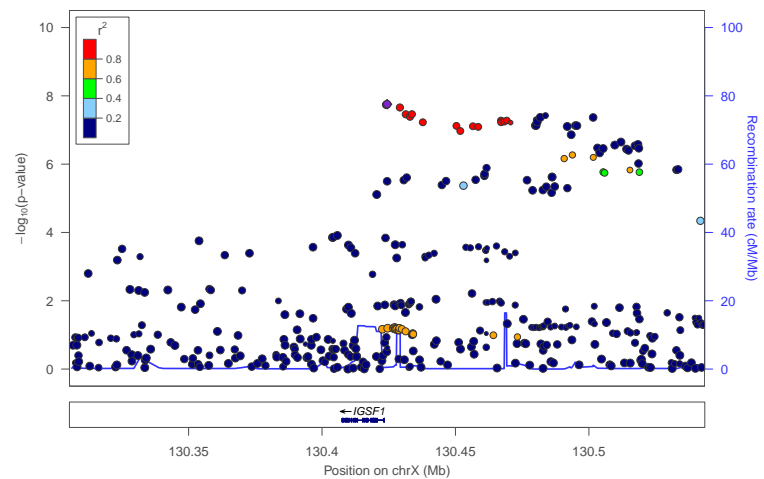

locus 557 rs144895060

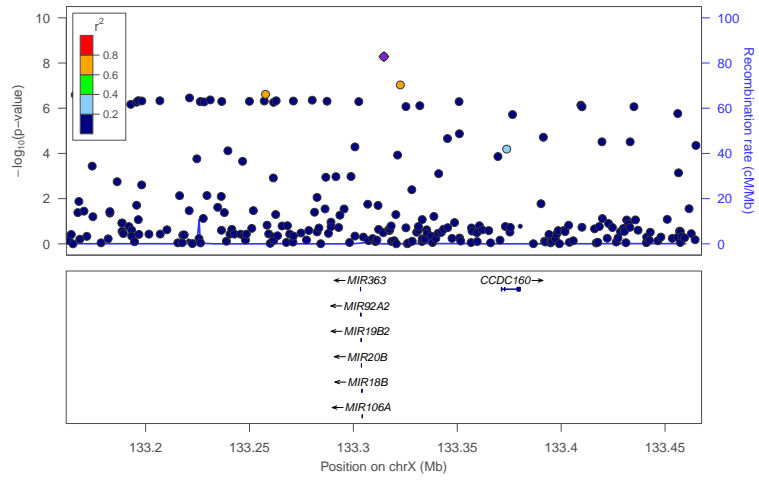

locus 558 rs2199679

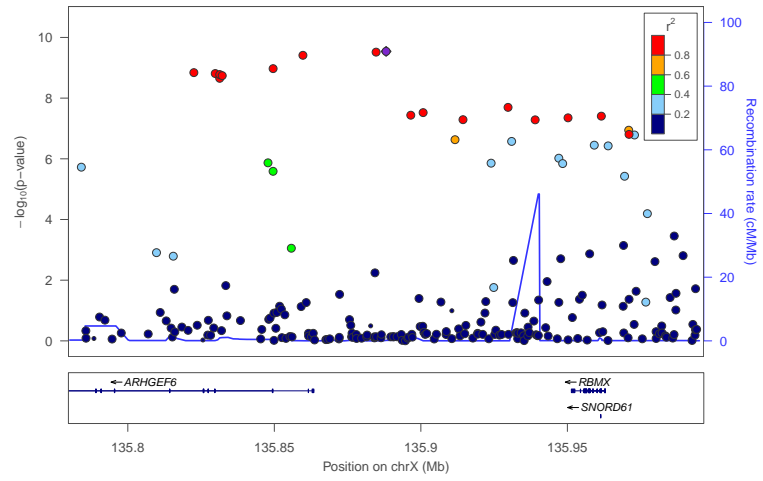

Supplement: 41588_2022_1124_MOESM4_ESM.pdf [file 41588_2022_1124_MOESM4_ESM.pdf]
